# Supplementary material for: Disulfiram Oxy-Derivatives Suppress Protein Retrotranslocation across the ER Membrane to the Cytosol and Initiate Paraptosis-like Cell Death
Source: MDPI journal article supplement (doi:10.3390/membranes12090845), 2022-08-29

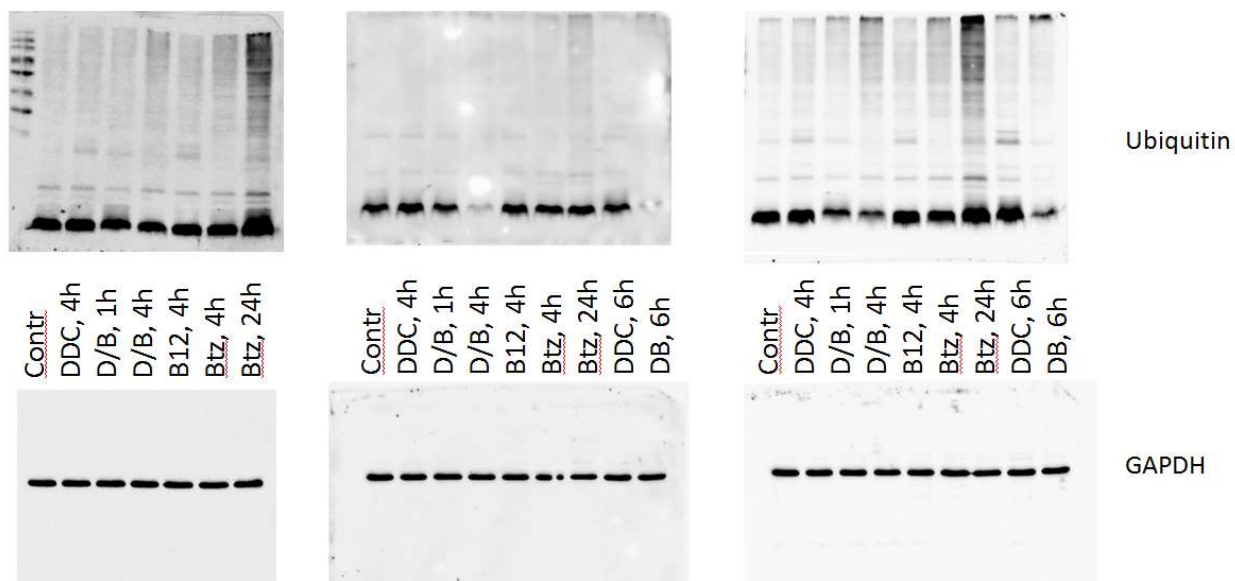

A

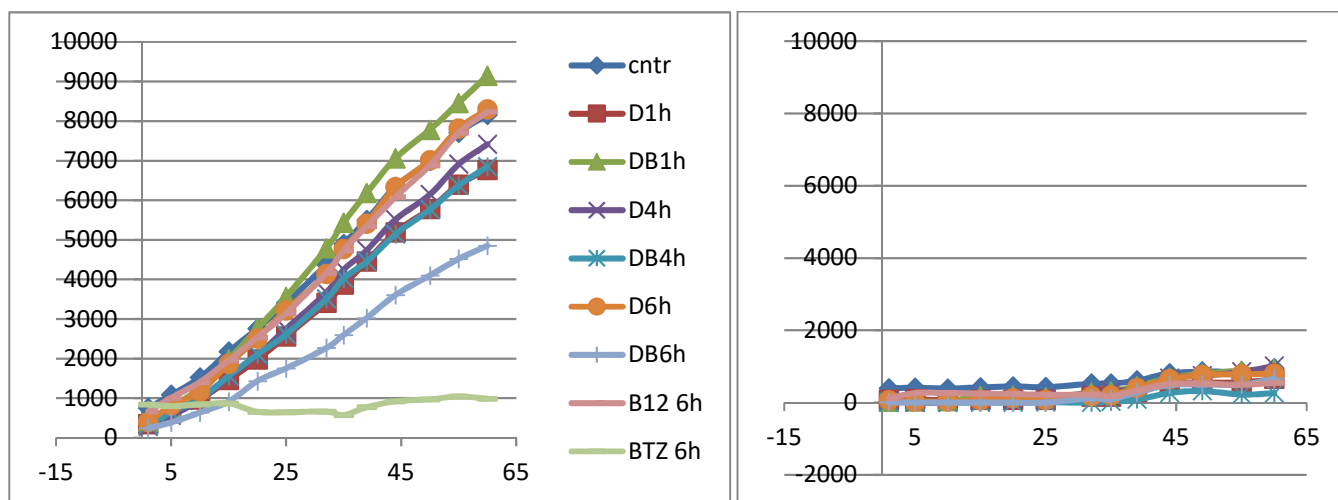

B

C

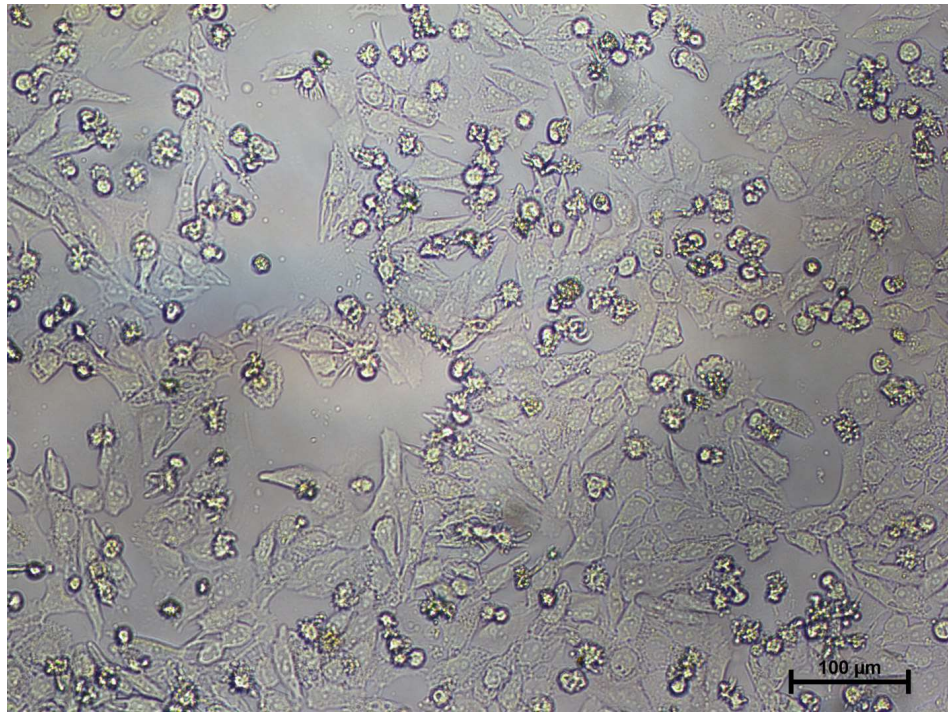

D

Supplementary Figure S1. DSFOxy impaire the UPS system of HEP-2 cells. (A) Decrease in monoubiquitin level, data of 3 independent experiments are given. (B) Estimation of 26S proteasome activity of HEP-2 cells during the initiation of their death by 1 mM DDC combined with 25  $\mu$ M B<sub>12b</sub>. Data from one of 5 typical experiments are given. (C,D) Bortezomib (BTZ, 1  $\mu$ M) inhibits this reaction after its addition to the wells of 96-plate (C) and induces the vacuolization of HEP-2 cells after the 24 h of incubation (D).

A. PPI enrichment (p-value  $7.57 \times 10^{-11}$ )

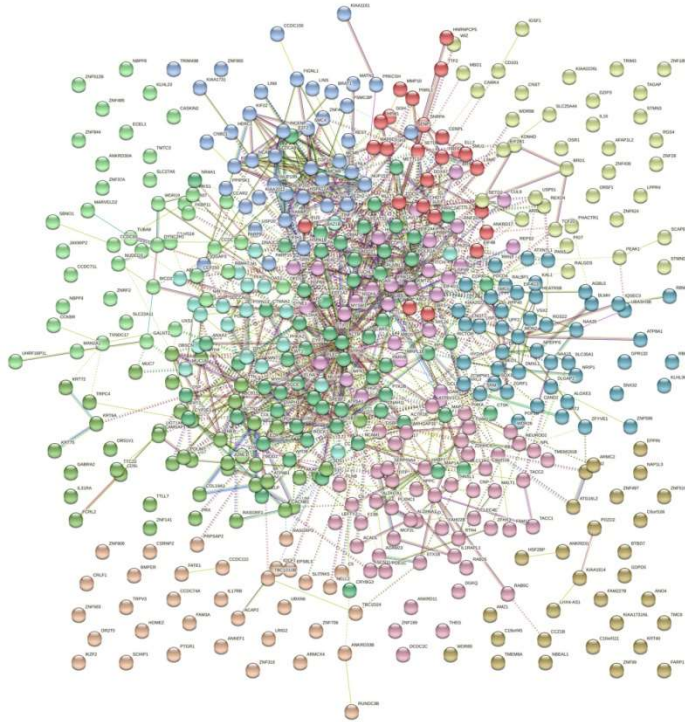

B. ACTB (p-value  $< 10^{-16}$ )

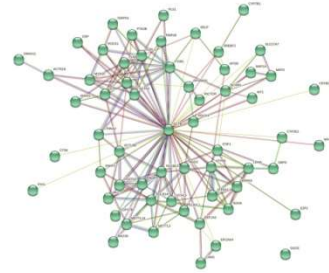

H. MON2 (p-value  $< 10^{-16}$ )

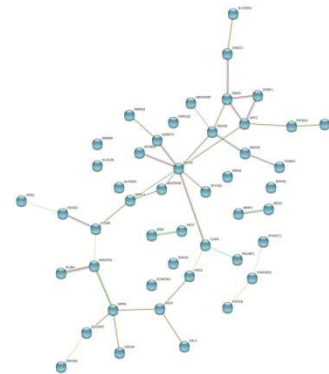

D. DNA&nucleus (p-value  $< 10^{-16}$ )

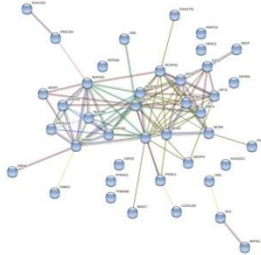

E. CDC5L (p-value  $9.97 \times 10^{-12}$ )

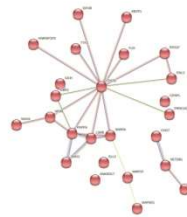

F. UBB (p-value  $4.23 \times 10^{-12}$ )

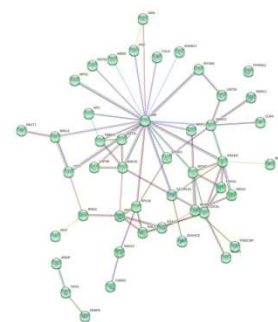

G. OFD1 (p-value  $< 10^{-16}$ )

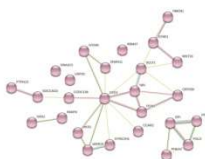

C. SYNE1 (p-value  $< 10^{-16}$ )

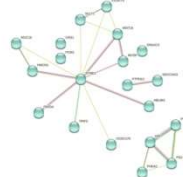

I. VAPA (p-value  $< 10^{-16}$ )

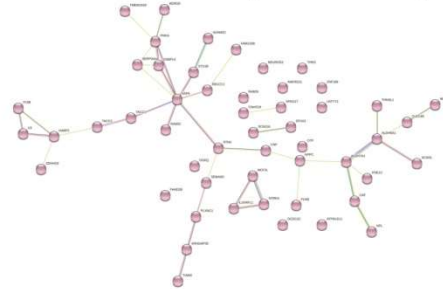

Supplementary Figure S2. PPI in protein clusters according to STRING data base.



A. PPI enrichment (p-value 0.0443)  
Response to stress

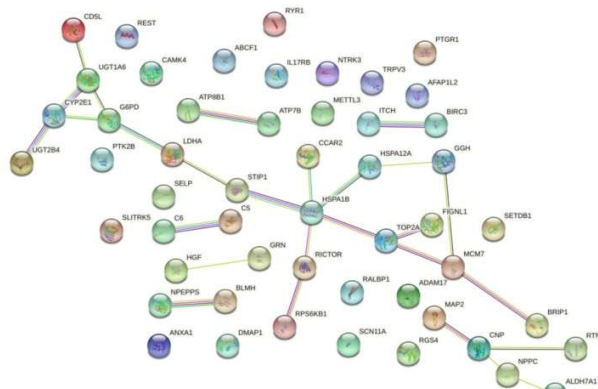

B. PPI enrichment (p-value 0.00368)  
Lipid metabolism

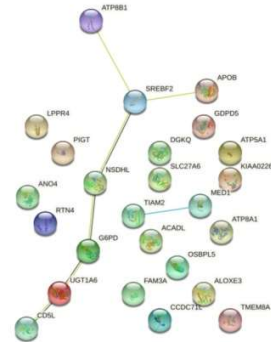

C. PPI enrichment (p-value  $9.4 \times 10^{-5}$ )  
Ras family

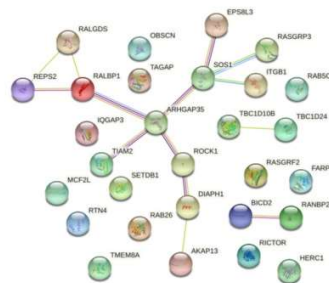

D. PPI enrichment (p-value 0.00513)  
PI

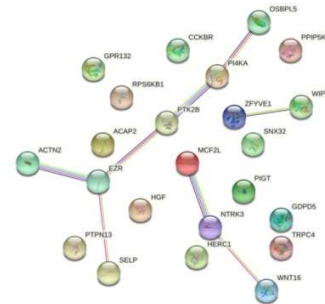

E. PPI enrichment (p-value 0.000325)  
Ca metabolism

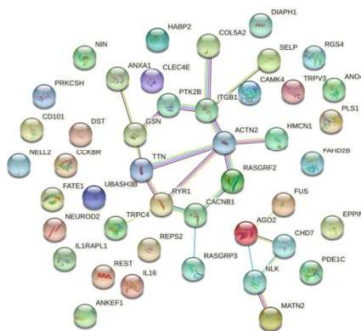

F. PPI enrichment (p-value 0.00722)  
Autophagy

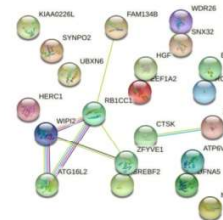

G. PPI enrichment (p-value 0.272)  
MAPK cascade

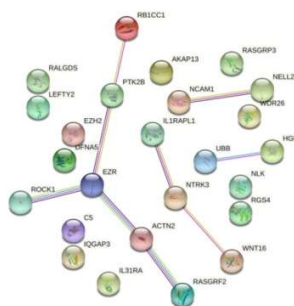

H. PPI enrichment (p-value 0.066)  
Transport of Na<sup>+</sup>, K<sup>+</sup>, and Cl<sup>-</sup> ions

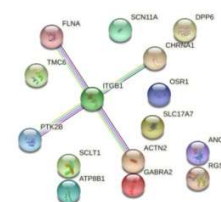

Supplement: s1 [file s1]
