# Supplementary material for: Disulfiram Oxy-Derivatives Suppress Protein Retrotranslocation across the ER Membrane to the Cytosol and Initiate Paraptosis-like Cell Death
Source: Membranes (Basel). 2022 Aug 29;12(9):845. doi: 10.3390/membranes12090845 (PMC9506514; doi:10.3390/membranes12090845)
Supplement: Supplementary file 1 [file membranes-12-00845-s001.zip › Table S1 Ub-proteins total, data of GO-slim analysis.xlsx]

## Sheet: contr Ub-proteins
Sample	Protein(s)	Protein Inference	Sequence	Missed Cleavages	Modified Sequence	Position	AAs Before	AAs After	Variable Modifications	Fixed Modifications	Probabilistic PTM score	D-score	#PSMs	Score	Confidence [%]
AKT_01	P0CG47	Related and Unrelated Proteins	LIFAGKQLEDGR	1	NH2-LIFAGK<ubq long k>QLEDGR-COOH	43, 119, 195; 43, 119, 195, 271, 347, 423, 499, 575, 651; 43; 43	QR, QR, QR; QR, QR, QR, QR, QR, QR, QR, QR, QR; QR; QR	TL, TL, TL; TL, TL, TL, TL, TL, TL, TL, TL, TL; TL; TL	Ubiquitination long of K (6)		Ubiquitination long of K (6: 100.0)	Ubiquitination long of K (6: 98.65211810012838)	3	43.6038	91.8033
AKT_01	P68104	Related Proteins	IVDMVPGKPMCVESFSDYPPLGR	0	NH2-IVDM<ox>VPGK<ubq long k>PM<ox>C<cmm>VESFSDYPPLGR-COOH	401; 401	AA; AA	FA; FA	Carbamidomethylation of C (11), Oxidation of M (10, 4), Ubiquitination long of K (8)		Carbamidomethylation of C (11: 100.0), Oxidation of M (4: 100.0, 10: 100.0), Ubiquitination long of K (8: 100.0)	Carbamidomethylation of C (11: 100.0), Oxidation of M (4: 100.0, 10: 100.0), Ubiquitination long of K (8: 100.0)	1	100	100
AKT_01	P68363	Related Proteins	QMVKCDPR	1	pyro-QMVK<ubq long k>C<cmm>DPR-COOH	301; 301; 301; 301; 301; 301; 301	AN; AN; AN; AN; AN; AN; NS	HG; HG; HG; HG; HG; HG; HG	Carbamidomethylation of C (5), Pyrolidone from Q (1), Ubiquitination long of K (4)		Carbamidomethylation of C (5: 100.0), Pyrolidone from Q (0: 100.0), Ubiquitination long of K (4: 100.0)	Carbamidomethylation of C (5: 93.11926605504587), Pyrolidone from Q (1: 93.11926605504587), Ubiquitination long of K (4: 93.11926605504587)	2	27.1877	91.8033
AKT_01	Q16288	Related Proteins	WMPPESIMYRK	1	NH2-WM<ox>PPESIMYRK<ub>-COOH	736; 719	IR; IR	FT; FT	Oxidation of M (2), Ubiquitination of K (11)		Oxidation of M (2: 99.99999994093768, 8: 2.690205740522066E-6), Ubiquitination of K (11: 100.0)	Oxidation of M (2: 53.17616240995415), Ubiquitination of K (11: 53.17616240995415)	7	17.5477	75.4098
AKT_01	Q6P2I3	Related Proteins	GDEVQCEIEELGVIINK	0	NH2-GDEVQCEIEELGVIINK<ub>-COOH	296; 296	KK; KK	VV; VV	Ubiquitination of K (17)		Ubiquitination of K (17: 100.0)	Ubiquitination of K (17: 93.89920424403184)	11	36.7327	91.8033
AKT_01	O14556	Related Proteins	GKLTGMAFR	1	NH2-GK<ub>LTGMAFR-COOH	298; 226	LK; LN	VP; VP	Ubiquitination of K (2)		Ubiquitination of K (2: 100.0)	Ubiquitination of K (2: 99.80237154150198)	1	23.4439	95.4545
AKT_01	P35609	Single Protein	ELPPDQAQYCIK	0	NH2-ELPPDQAQYC<cmm>IK<ub>-COOH	853	RR	RM	Carbamidomethylation of C (10), Ubiquitination of K (12)		Carbamidomethylation of C (10: 100.0), Ubiquitination of K (12: 100.0)	Carbamidomethylation of C (10: 100.0), Ubiquitination of K (12: 100.0)	3	100	100
AKT_01	Q6DN72	Single Protein	LWTAVLLFVPCVGK	0	NH2-LWTAVLLFVPC<cmm>VGK<ubq long k>-COOH	3	ML	TV	Carbamidomethylation of C (11), Ubiquitination long of K (14)		Carbamidomethylation of C (11: 100.0), Ubiquitination long of K (14: 100.0)	Carbamidomethylation of C (11: 99.03225806451613), Ubiquitination long of K (14: 99.03225806451613)	3	29.6339	95.082
AKT_01	Q8NEN0	Single Protein	FISGNLGFLNEMISK	0	NH2-FISGNLGFLNEM<ox>ISK<ub>-COOH	403	IK	GA	Oxidation of M (12), Ubiquitination of K (15)		Oxidation of M (12: 100.0), Ubiquitination of K (15: 100.0)	Oxidation of M (12: 97.01986754966887), Ubiquitination of K (15: 97.01986754966887)	7	28.8199	91.8033
AKT_01	P04083	Single Protein	IMVSRSEIDMNDIK	1	NH2-IM<ox>VSRSEIDMNDIK<ub>-COOH	299	IR	AF	Oxidation of M (2), Ubiquitination of K (14)		Oxidation of M (2: 99.99999999972586, 10: 50.0), Ubiquitination of K (14: 100.0)	Oxidation of M (2: 68.05644644002567), Ubiquitination of K (14: 68.05644644002567)	7	22.2415	92.0635
AKT_01	P38646	Single Protein	QKAMQDAEVSKSDIGEVILVGGMTR	2	pyro-QK<ub>AM<ox>QDAEVSK<ub>SDIGEVILVGGMTR-COOH	367	PC	MP	Oxidation of M (4), Pyrolidone from Q (1), Ubiquitination of K (2, 11)		Oxidation of M (4: 99.99999999999987, 23: 1.288202472326215E-13), Pyrolidone from Q (0: 100.0), Ubiquitination of K (2: 100.0, 11: 100.0)	Oxidation of M (4: 100.0), Pyrolidone from Q (1: 100.0), Ubiquitination of K (2: 100.0, 11: 100.0)	1	100	100
AKT_01	Q9NZN1	Single Protein	LLYPMESK	0	NH2-LLYPM<ox>ESK<ub>-COOH	244	PK	LT	Oxidation of M (5), Ubiquitination of K (8)		Oxidation of M (5: 100.0), Ubiquitination of K (8: 100.0)	Oxidation of M (5: 75.83807716635042), Ubiquitination of K (8: 75.83807716635042)	3	18.8824	78.125
AKT_01	Q5T8P6	Single Protein	ELLDTELDLYK	0	pyro-ELLDTELDLYK<ub>-COOH	813	QK	KM	Pyrolidone from E (1), Ubiquitination of K (11)		Pyrolidone from E (0: 100.0), Ubiquitination of K (11: 100.0)	Pyrolidone from E (1: 87.0843989769821), Ubiquitination of K (11: 87.0843989769821)	5	28.7108	92.0635
AKT_01	Q12802	Single Protein	EALLAQREEEVQQGQQDLEKER	2	pyro-EALLAQREEEVQQGQQDLEK<ub>ER-COOH	2616	ER	EE	Pyrolidone from E (1), Ubiquitination of K (20)		Pyrolidone from E (0: 100.0), Ubiquitination of K (20: 100.0)	Pyrolidone from E (1: 99.93650793650794), Ubiquitination of K (20: 99.93650793650794)	9	100	100
AKT_01	P01031	Single Protein	KPLERVFQFLEK	1	NH2-K<ub>PLERVFQFLEK<ub>-COOH	618	AK	SD	Ubiquitination of K (12, 1)		Ubiquitination of K (1: 100.0, 12: 100.0)	Ubiquitination of K (1: 85.67725210628645, 12: 85.67725210628645)	5	22.0148	91.8033
AKT_01	Q8NBE8	Single Protein	IRSLIYNALNPMHK	1	NH2-IRSLIYNALNPMHK<ub>-COOH	252	NK	EI	Ubiquitination of K (14)		Ubiquitination of K (14: 100.0)	Ubiquitination of K (14: 94.32717678100263)	5	38.3448	91.8033
AKT_01	Q96QB1	Single Protein	VNVLLSRYLIEPCGPGK	1	NH2-VNVLLSRYLIEPCGPGK<ub>-COOH	1461	VR	SK	Ubiquitination of K (17)		Ubiquitination of K (17: 100.0)	Ubiquitination of K (17: 98.76703439325114)	1	19.9123	84.127
AKT_01	Q9H251	Single Protein	VRINVLDVNDNVPTFQK	1	NH2-VRINVLDVNDNVPTFQK<ub>-COOH	547	GR	DA	Ubiquitination of K (17)		Ubiquitination of K (17: 100.0)	Ubiquitination of K (17: 97.27802981205444)	4	27.098	91.8033
AKT_01	O95696	Single Protein	GKPALVRR	1	NH2-GK<ub>PALVRR-COOH	876	GR	HT	Ubiquitination of K (2)		Ubiquitination of K (2: 100.0)	Ubiquitination of K (2: 94.32717678100263)	6	31.2816	95.082
AKT_01	P55786	Single Protein	GWDPKPGEGHLDALLR	0	NH2-GWDPK<ub>PGEGHLDALLR-COOH	691	RL	GL	Ubiquitination of K (5)		Ubiquitination of K (5: 100.0)	Ubiquitination of K (5: 100.0)	2	100	100
AKT_01	O95980	Single Protein	NDISKVCRK	2	NH2-NDISK<ub>VCRK<ub>-COOH	124	SK	EY	Ubiquitination of K (5, 9)		Ubiquitination of K (5: 100.0, 9: 100.0)	Ubiquitination of K (5: 93.89920424403184, 9: 93.89920424403184)	8	31.3126	95.082
AKT_01	Q9C0D2	Single Protein	IQNLEKLYLASLRSMGEGHR	2	NH2-IQNLEK<ub>LYLASLRSMGEGHR-COOH	79	QK	QA	Ubiquitination of K (6)		Ubiquitination of K (6: 100.0)	Ubiquitination of K (6: 99.3455497382199)	20	100	99.9661
AKT_01	Q99963	Single Protein	DSLDINVKQTFIDPLQLLQDK	1	NH2-DSLDINVK<ub>QTFIDPLQLLQDK<ub>-COOH	129	VK	DL	Ubiquitination of K (8, 21)		Ubiquitination of K (8: 100.0, 21: 100.0)	Ubiquitination of K (8: 66.5406427221172, 21: 66.5406427221172)	10	26.3637	92.1875
2155	A4D161	Single Protein	SPTGMDCKLVGPETLCFCTHRYK	2	NH2-SPTGM<ox>DCK<ub>LVGPETLC<cmm>FCTHRYK-COOH	60	WR	QH	Carbamidomethylation of C (16), Oxidation of M (5), Ubiquitination of K (8)		Carbamidomethylation of C (7: 33.33333333333333, 16: 49.98694659649914, 18: 49.98694659649914), Oxidation of M (5: 100.0), Ubiquitination of K (8: 99.99999997585384, 23: 0.12859737027305052)	Oxidation of M (5: 84.76190476190476), Ubiquitination of K (8: 84.76190476190476)	2	4.98055	73.8095
2638	A6NP11	Single Protein	IVHTGEKLYTCEECGKAFTFSSTLNTHK	2	NH2-IVHTGEKLYTC<cmm>EECGK<longub>AFTFSSTLNTHK-COOH	344	HK	RI	Carbamidomethylation of C (11), Long ubiquitination (16)		Carbamidomethylation of C (11: 99.95770382951544, 14: 0.04229617048456928), Long ubiquitination (7: 1.1455080516761683E-8, 16: 99.99999998854491, 28: 2.857124930164099E-21)	Carbamidomethylation of C (11: 19.523809523809526), Long ubiquitination (16: 63.650793650793645)	1	6.50665	86.2275
1436	A6QL64	Single Protein	QPALKAICDK	1	NH2-QPALK<ub>AICDK<ub>-COOH	1128	PK	ED	Ubiquitination of K (5, 10)		Ubiquitination of K (5: 100.0, 10: 100.0)	Ubiquitination of K (5: 7.936507936507942, 10: 7.936507936507942)	1	3.11546	60.479
179	C9J069	Single Protein	VATPGPASKCSPCERSVARPAEPAPFNK	2	NH2-VATPGPASK<ub>C<cmm>SPCERSVARPAEPAPFNK-COOH	20	IK	RH	Carbamidomethylation of C (10), Ubiquitination of K (9)		Carbamidomethylation of C (10: 50.0, 13: 50.0), Ubiquitination of K (9: 99.99999999637949, 28: 2.962826189757438E-6)	Ubiquitination of K (9: 94.28571428571428)	2	10.4061	92.4531
2087	O15083	Single Protein	ELDIKDSKLGSSMNSIK	2	NH2-ELDIKDSK<ub>LGSSMNSIK-COOH	167	RK	TF	Ubiquitination of K (8)		Ubiquitination of K (5: 1.1878088259539715E-8, 8: 99.96006725565954, 17: 0.0399327324623639)	Ubiquitination of K (8: 69.52380952380952)	1	2.76206	64.2458
972	O15131	Related Proteins	QKREEQLFK	2	NH2-QK<ub>REEQLFK-COOH	38; 38	RK; RK	RR; RR	Ubiquitination of K (2)		Ubiquitination of K (2: 100.0, 9: 7.250967117775731E-18)	Ubiquitination of K (2: 27.301587301587304)	1	7.98766	90
855	O15547	Single Protein	CPQLAGAGSMGSPGATTGWGLLDYK	0	NH2-C<cmm>PQLAGAGSMGSPGATTGWGLLDYK<ub>-COOH	2	M	TE	Carbamidomethylation of C (1), Ubiquitination of K (25)		Carbamidomethylation of C (1: 100.0), Ubiquitination of K (25: 100.0)	Carbamidomethylation of C (1: 83.80952380952381), Ubiquitination of K (25: 83.80952380952381)	1	3.49635	63.2768
2709	O43427	Single Protein	VFKVVEEMR	1	NH2-VFK<ub>VVEEM<ox>R-COOH	144	KR	GS	Oxidation of M (8), Ubiquitination of K (3)		Oxidation of M (8: 100.0), Ubiquitination of K (3: 100.0)	Oxidation of M (8: 23.17460317460317), Ubiquitination of K (3: 23.17460317460317)	1	6.73827	87.4251
1492	O43663	Single Protein	QHVTTLRETK	1	NH2-QHVTTLRETK<ub>-COOH	158	FR	AS	Ubiquitination of K (10)		Ubiquitination of K (10: 100.0)	Ubiquitination of K (10: 17.777777777777782)	1	5.16219	78.1065
305	O60347	Single Protein	VWSLAVGNELNITPELYEIFLSRAKER	2	NH2-VWSLAVGNELNITPELYEIFLSRAK<longub>ER-COOH	493	GK	WK	Long ubiquitination (25)		Long ubiquitination (25: 100.0)	Long ubiquitination (25: 69.2063492063492)	1	2.66661	57.485
680	O60486	Single Protein	TNQALQVFYIKSIEPQKVSTLGK	2	NH2-TNQALQVFYIK<longub>SIEPQK<ub>VSTLGK<longub>-COOH	655	NR	SN	Long ubiquitination (11, 23), Ubiquitination of K (17)		Long ubiquitination (11: 99.99999998188052, 17: 2.7480125041327486E-5, 23: 99.99997253799444), Ubiquitination of K (11: 1.7472457357983096E-8, 17: 99.99999998251378, 23: 1.3752795131039879E-11)	Long ubiquitination (11: 89.52380952380953, 23: 89.52380952380953), Ubiquitination of K (17: 89.52380952380953)	1	6.28389	85.3107
1837	O60506	Single Protein	HIGVCISVANNRLFVGSIPKSK	2	NH2-HIGVCISVANNRLFVGSIPK<ub>SK<ub>-COOH	233	GK	TK	Ubiquitination of K (20, 22)		Ubiquitination of K (20: 100.0, 22: 100.0)	Ubiquitination of K (20: 68.57142857142857, 22: 68.57142857142857)	1	2.39223	57.7381
1081	O60763	Single Protein	LSALLQETKELKNEIK	2	NH2-LSALLQETK<ub>ELKNEIK-COOH	850	GR	AL	Ubiquitination of K (9)		Ubiquitination of K (9: 99.91294048263138, 12: 0.04352975868430078, 16: 0.04352975868430078)	Ubiquitination of K (9: 46.03174603174603)	1	2.48178	61.4035
2016	O60765	Related Proteins	ALSSHSTLIIHERIHTGEKPCKCK	2	NH2-ALSSHSTLIIHERIHTGEK<ub>PC<cmm>K<longub>CK<ub>-COOH	446; 446	GK; GK	VC; VC	Carbamidomethylation of C (21), Long ubiquitination (22), Ubiquitination of K (24, 19)		Carbamidomethylation of C (21: 50.0, 23: 50.0), Long ubiquitination (19: 0.10026554379966317, 22: 99.79946891240068, 24: 0.10026554379966317), Ubiquitination of K (19: 99.90112027518155, 22: 0.19775944963687178, 24: 99.90112027518155)	Ubiquitination of K (19: 43.17460317460318)	1	4.82261	73.0539
1921	O75096	Single Protein	SINSANKFTGK	1	NH2-SINSANK<ub>FTGK<ub>-COOH	662	TK	NQ	Ubiquitination of K (7, 11)		Ubiquitination of K (7: 100.0, 11: 100.0)	Ubiquitination of K (7: 18.0952380952381, 11: 18.0952380952381)	1	4.08125	71.8563
735	O75175	Single Protein	LQGEIDRCLKK	2	NH2-LQGEIDRC<cmm>LK<ub>K-COOH	7	RK	VS	Carbamidomethylation of C (8), Ubiquitination of K (10)		Carbamidomethylation of C (8: 100.0), Ubiquitination of K (10: 50.0, 11: 50.0)	Carbamidomethylation of C (8: 23.17460317460317)	1	5.87912	82.0359
948	O75346	Single Protein	THTGEKPYKCEECGKSFTASSTLTTHK	2	NH2-THTGEK<longub>PYKCEEC<cmm>GKSFTASSTLTTHK-COOH	417	KR	RI	Carbamidomethylation of C (13), Long ubiquitination (6)		Carbamidomethylation of C (10: 0.15391209634015207, 13: 99.84608790365985), Long ubiquitination (6: 99.99970742595167, 9: 1.4628702416220326E-4, 15: 1.4628702416220326E-4, 27: 4.7435746575643024E-18)	Carbamidomethylation of C (13: 47.460317460317455), Long ubiquitination (15: 47.460317460317455)	1	5.14446	77.7778
637	O75354	Single Protein	GGSLVVGDFEIAAKYVCR	1	NH2-GGSLVVGDFEIAAK<longub>YVC<cmm>R-COOH	400	EK	TL	Carbamidomethylation of C (17), Long ubiquitination (14)		Carbamidomethylation of C (17: 100.0), Long ubiquitination (14: 100.0)	Carbamidomethylation of C (17: 65.39682539682539), Long ubiquitination (14: 65.39682539682539)	2	2.57321	60.452
137	O75643	Single Protein	FLYEPLPVESHLDHCMHDHFNAEIVTK	0	NH2-FLYEPLPVESHLDHCM<ox>HDHFNAEIVTK<longub>-COOH	1717	KK	TI	Long ubiquitination (27), Oxidation of M (16)		Long ubiquitination (27: 100.0), Oxidation of M (16: 100.0)	Long ubiquitination (27: 59.36507936507937), Oxidation of M (16: 59.36507936507937)	1	2.48178	61.4035
858	O75916	Single Protein	KGILEEYEK	1	NH2-K<ub>GILEEYEK-COOH	133	KK	EN	Ubiquitination of K (1)		Ubiquitination of K (1: 100.0, 9: 6.834486183644811E-28)	Ubiquitination of K (1: 66.98412698412699)	1	14.8001	98.5437
806	O76054	Single Protein	VNFTVEVLLPDKASEEKMK	2	NH2-VNFTVEVLLPDKASEEKMK<ub>-COOH	377	KK	QL	Ubiquitination of K (19)		Ubiquitination of K (12: 33.33333333333333, 17: 33.33333333333333, 19: 33.33333333333333)	Ubiquitination of K (19: 37.585178445051056)	1	2.48178	61.4035
363	O94830	Single Protein	KNSMGIKRPAPQPASGANIPK	2	NH2-K<ub>NSMGIKRPAPQPASGANIPK-COOH	445	TR	ES	Ubiquitination of K (1)		Ubiquitination of K (1: 99.97951096465142, 7: 0.020489035348581635, 21: 7.477651776080425E-20)	Ubiquitination of K (1: 28.94752805580831)	1	6.9897	87.0056
824	O95359	Single Protein	LPALGEKRPEGACGDGQSSRVSPPAADVLK	2	NH2-LPALGEK<longub>RPEGAC<cmm>GDGQSSRVSPPAADVLK-COOH	941	QK	DF	Carbamidomethylation of C (13), Long ubiquitination (7)		Carbamidomethylation of C (13: 100.0), Long ubiquitination (7: 99.99999999999997, 30: 2.0465241419299E-14)	Carbamidomethylation of C (13: 91.74603174603175), Long ubiquitination (7: 91.74603174603175)	1	7.25299	87.3563
1839	O95696	Single Protein	GKPALVRR	1	NH2-GK<ub>PALVRR-COOH	876	GR	HT	Ubiquitination of K (2)		Ubiquitination of K (2: 100.0)	Ubiquitination of K (2: 58.09523809523809)	2	21.769	99.4681
533	O95741	Single Protein	KNYKSSGTVVLAQCTVEK	2	NH2-K<ub>NYKSSGTVVLAQC<cmm>TVEK<ub>-COOH	274	KK	VH	Carbamidomethylation of C (14), Ubiquitination of K (1, 18)		Carbamidomethylation of C (14: 100.0), Ubiquitination of K (1: 99.98096537534374, 4: 0.01903462465626088, 18: 100.0)	Carbamidomethylation of C (14: 92.38095238095238), Ubiquitination of K (1: 27.993125063188756, 18: 92.38095238095238)	1	6.9897	87.0056
1000	O95995	Single Protein	AKGTPIVDGLAPEDMSKEQVEEHVSR	2	NH2-AK<ub>GTPIVDGLAPEDM<ox>SK<longub>EQVEEHVSR-COOH	12	GK	IR	Long ubiquitination (17), Oxidation of M (15), Ubiquitination of K (2)		Long ubiquitination (2: 5.880592330102574E-11, 17: 100.0), Oxidation of M (15: 100.0), Ubiquitination of K (2: 100.0, 17: 4.511405953676495E-8)	Long ubiquitination (17: 91.42857142857143), Oxidation of M (15: 91.42857142857143), Ubiquitination of K (2: 91.42857142857143)	2	8.95995	91.6664
2764	P04114	Single Protein	KSISAALEHK	1	NH2-K<ub>SISAALEHK-COOH	1958	SR	VS	Ubiquitination of K (1)		Ubiquitination of K (1: 100.0, 10: 1.2609258315201453E-22)	Ubiquitination of K (1: 64.76190476190476)	1	13.3388	98.8506
1788	P06396	Single Protein	VVQGKEPAHLMSLFGGKPMIIYKGGTSR	2	NH2-VVQGKEPAHLM<ox>SLFGGK<longub>PMIIYKGGTSR-COOH	526	SR	EG	Long ubiquitination (17), Oxidation of M (11)		Long ubiquitination (5: 0.12298612650924248, 17: 99.99999996262193, 23: 2.032087396197912E-4), Oxidation of M (11: 99.99999999998789, 19: 1.7543915318457033E-4)	Long ubiquitination (17: 96.5079365079365), Oxidation of M (11: 96.5079365079365)	2	17.5847	98.3657
1487	P06576	Single Protein	ILQDYKSLQDIIAILGMDELSEEDKLTVSR	2	NH2-ILQDYK<ub>SLQDIIAILGM<ox>DELSEEDKLTVSR-COOH	427	QK	AR	Oxidation of M (17), Ubiquitination of K (6)		Oxidation of M (17: 100.0), Ubiquitination of K (6: 100.0, 25: 2.3793674360337262E-39)	Oxidation of M (17: 100.0), Ubiquitination of K (6: 100.0)	1	100	100
900	P07948	Single Protein	ACISPKPQKPWDKDAWEIPR	1	NH2-ACISPK<ub>PQKPWDKDAWEIPR-COOH	225	EK	ES	Ubiquitination of K (6)		Ubiquitination of K (6: 49.987712082193184, 9: 49.987712082193184, 13: 0.02457583561362391)	Ubiquitination of K (6: 35.66322919826104)	1	2.48178	61.4035
2084	P08195	Single Protein	IGDLQAFQGHGAGNLAGLKGRLDYLSSLK	2	NH2-IGDLQAFQGHGAGNLAGLK<ub>GRLDYLSSLK<longub>-COOH	227	YR	VK	Long ubiquitination (29), Ubiquitination of K (19)		Long ubiquitination (19: 0.12437075900883614, 29: 99.87562924099117), Ubiquitination of K (19: 99.86013461251271, 29: 0.13986538748729957)	Long ubiquitination (29: 58.412698412698404), Ubiquitination of K (19: 58.412698412698404)	1	2.39223	57.7381
888	P08912	Single Protein	TFKMLLLCRWK	2	NH2-TFKM<ox>LLLCRWK<ub>-COOH	505	RK	KK	Oxidation of M (4), Ubiquitination of K (11)		Oxidation of M (4: 100.0), Ubiquitination of K (3: 2.9558939440172483E-16, 11: 100.0)	Oxidation of M (4: 19.365079365079364), Ubiquitination of K (11: 19.365079365079364)	1	4.62974	72.9412
2606	P09467	Single Protein	LLYECNPMAYVMEKAGGMATTGK	1	NH2-LLYECNPMAYVM<ox>EK<ub>AGGM<ox>ATTGK<ub>-COOH	278	LR	EA	Oxidation of M (18, 12), Ubiquitination of K (14, 23)		Oxidation of M (8: 50.000000290602294, 12: 99.98765873992156, 18: 99.9999999996813), Ubiquitination of K (14: 100.0, 23: 100.0)	Oxidation of M (8: 48.47133757961783, 18: 80.0), Ubiquitination of K (14: 80.0, 23: 80.0)	2	5.49208	80.5822
2148	P09913	Single Protein	EFKATMCNLLAYLK	1	NH2-EFK<ub>ATM<ox>C<cmm>NLLAYLK-COOH	48	NR	HL	Carbamidomethylation of C (7), Oxidation of M (6), Ubiquitination of K (3)		Carbamidomethylation of C (7: 100.0), Oxidation of M (6: 100.0), Ubiquitination of K (3: 50.0, 14: 50.0)		1	2.8272	64.2458
2749	P0CL83	Related Proteins	FKDWMVSMIVDR	1	NH2-FK<ub>DWMVSMIVDR-COOH	88; 88	GR; GR	EY; EY	Ubiquitination of K (2)		Ubiquitination of K (2: 100.0)	Ubiquitination of K (2: 28.888888888888886)	1	6.22674	84.2697
1542	P0DMV8	Related Proteins	STGKANKITITNDK	2	NH2-STGK<ub>ANKITITNDK-COOH	494; 494; 496	DK; DK; DR	GR; GR; GR	Ubiquitination of K (4)		Ubiquitination of K (4: 99.98776946162504, 7: 0.012230537940172186, 14: 4.3478410803393957E-10)	Ubiquitination of K (4: 26.349206349206344)	1	5.87912	82.0359
2146	P14923	Single Protein	NKTLVTQNSGVEALIHAILR	1	NH2-NK<ub>TLVTQNSGVEALIHAILR-COOH	425	SK	AG	Ubiquitination of K (2)		Ubiquitination of K (2: 100.0)	Ubiquitination of K (2: 88.25396825396825)	1	4.98055	73.8095
1772	P17024	Single Protein	VCGKAFTCSSSIR	1	NH2-VC<cmm>GK<longub>AFTCSSSIR-COOH	455	CK	YH	Carbamidomethylation of C (2), Long ubiquitination (4)		Carbamidomethylation of C (2: 99.98556468337803, 8: 0.01443531662196965), Long ubiquitination (4: 100.0)	Carbamidomethylation of C (2: 7.301587301587298), Long ubiquitination (4: 7.301587301587298)	1	3.15825	62.5
2453	P23435	Single Protein	KGIYSFNFHVVKVYNR	2	NH2-K<ub>GIYSFNFHVVK<longub>VYNR-COOH	109	PR	QT	Long ubiquitination (12), Ubiquitination of K (1)		Long ubiquitination (1: 0.07577594205796438, 12: 99.92422405794204), Ubiquitination of K (1: 99.92550191470448, 12: 0.07449808529552586)	Long ubiquitination (12: 68.88888888888889), Ubiquitination of K (1: 68.88888888888889)	1	2.76206	64.2458
526	P27338	Single Protein	IMDLLGDRVKLERPVIYIDQTR	2	NH2-IM<ox>DLLGDRVK<longub>LERPVIYIDQTR-COOH	221	ER	EN	Long ubiquitination (10), Oxidation of M (2)		Long ubiquitination (10: 100.0), Oxidation of M (2: 100.0)	Long ubiquitination (10: 60.31746031746032), Oxidation of M (2: 60.31746031746032)	1	2.57321	60.452
1123	P27694	Single Protein	CEKCDTEFPNFK	1	NH2-C<cmm>EK<longub>CDTEFPNFK-COOH	500	YR	YR	Carbamidomethylation of C (1), Long ubiquitination (3)		Carbamidomethylation of C (1: 99.9924480883747, 4: 0.011826057082537275), Long ubiquitination (3: 99.99999913789017, 12: 2.0914942765428547E-6)		2	2.76887	64.2458
1545	P28288	Single Protein	FSMGFIDSIIAK	0	NH2-FSM<ox>GFIDSIIAK<ub>-COOH	311	FR	YL	Oxidation of M (3), Ubiquitination of K (12)		Oxidation of M (3: 100.0), Ubiquitination of K (12: 100.0)	Oxidation of M (3: 73.96825396825398), Ubiquitination of K (12: 73.96825396825398)	2	34.5773	100
2216	P29536	Single Protein	KGGAPAAPPPPPPPLAPPLIMENLK	1	NH2-KGGAPAAPPPPPPPLAPPLIMENLK<longub>-COOH	527	PK	NS	Long ubiquitination (25)		Long ubiquitination (1: 1.3637234437221632E-33, 25: 100.0)	Long ubiquitination (25: 99.68253968253968)	1	19.2942	99.5726
2842	P29622	Single Protein	FLNDTMAVYEAK	0	NH2-FLNDTM<ox>AVYEAK<longub>-COOH	155	AK	LF	Long ubiquitination (12), Oxidation of M (6)		Long ubiquitination (12: 100.0), Oxidation of M (6: 100.0)	Long ubiquitination (12: 65.39682539682539), Oxidation of M (6: 65.39682539682539)	2	18.906	99.5918
379	P30085	Single Protein	DERKNPDSQYGELIEK	2	NH2-DERK<longub>NPDSQYGELIEK<ub>-COOH	40	LR	YI	Long ubiquitination (4), Ubiquitination of K (16)		Long ubiquitination (4: 100.0, 16: 5.8546872792135895E-15), Ubiquitination of K (4: 5.40371341440023E-15, 16: 100.0)	Long ubiquitination (4: 83.80952380952381), Ubiquitination of K (16: 83.80952380952381)	1	3.61217	68.0473
2545	P31040	Single Protein	EDYKVRIDEYDYSKPIQGQQK	2	NH2-EDYKVRIDEYDYSK<ub>PIQGQQK-COOH	595	AR	KP	Ubiquitination of K (14)		Ubiquitination of K (4: 0.06273775890195767, 14: 99.93726219475457, 21: 4.634347717409012E-8)	Ubiquitination of K (14: 2.539682539682539)	1	3.0617	64.2458
2292	P35659	Single Protein	FRNAMLKSICEVLDLER	2	NH2-FRNAM<ox>LK<longub>SIC<cmm>EVLDLER-COOH	152	KK	SG	Carbamidomethylation of C (10), Long ubiquitination (7), Oxidation of M (5)		Carbamidomethylation of C (10: 100.0), Long ubiquitination (7: 100.0), Oxidation of M (5: 100.0)	Carbamidomethylation of C (10: 68.25396825396825), Long ubiquitination (7: 68.25396825396825), Oxidation of M (5: 68.25396825396825)	1	2.48178	61.4035
1042	P35670	Single Protein	GDIVKVVPGGK	1	NH2-GDIVKVVPGGK<ub>-COOH	828	QR	FP	Ubiquitination of K (11)		Ubiquitination of K (5: 2.118060586116171E-11, 11: 99.99999999997883)	Ubiquitination of K (11: 14.28571428571429)	1	3.40128	63.5838
2310	P37275	Single Protein	EGNAKNCWEDDRK	2	NH2-EGNAKNCWEDDRK<longub>-COOH	76	ER	EG	Long ubiquitination (13)		Long ubiquitination (5: 8.925892560013514E-13, 13: 99.9999999999991)	Long ubiquitination (13: 21.269841269841272)	1	4.08125	71.8563
2436	P38398	Single Protein	QKLPCSENPR	1	NH2-QK<ub>LPC<cmm>SENPR-COOH	356	NK	DT	Carbamidomethylation of C (5), Ubiquitination of K (2)		Carbamidomethylation of C (5: 100.0), Ubiquitination of K (2: 100.0)	Carbamidomethylation of C (5: 20.63492063492064), Ubiquitination of K (2: 20.63492063492064)	1	4.94071	72.093
618	P45379	Single Protein	FKQQKYEINVLR	2	NH2-FK<ub>QQK<longub>YEINVLR-COOH	264	EK	NR	Long ubiquitination (5), Ubiquitination of K (2)		Long ubiquitination (2: 50.0, 5: 99.9899724458405), Ubiquitination of K (2: 99.9902809556337, 5: 50.0)	Long ubiquitination (5: 42.029622889495506), Ubiquitination of K (2: 42.029622889495506)	2	4.69672	72.5371
1237	P46087	Single Protein	KGPQSLFNAPR	1	NH2-K<ub>GPQSLFNAPR-COOH	92	GK	GK	Ubiquitination of K (1)		Ubiquitination of K (1: 100.0)	Ubiquitination of K (1: 23.492063492063497)	1	4.15549	72.7811
905	P49419	Single Protein	VLEDNKLPGAICSLTCGGADIGTAMAKDER	2	NH2-VLEDNKLPGAICSLTC<cmm>GGADIGTAMAK<ub>DER-COOH	237	AK	VN	Carbamidomethylation of C (16), Ubiquitination of K (27)		Carbamidomethylation of C (12: 50.0, 16: 50.0), Ubiquitination of K (6: 0.09494057551220367, 27: 99.9050594244878)	Carbamidomethylation of C (16: 63.8095238095238), Ubiquitination of K (6: 63.8095238095238)	1	2.39223	57.7381
579	P49790	Single Protein	ASGAGGVGGGGGGKIR	1	NH2-ASGAGGVGGGGGGK<ub>IR-COOH	2	M	TR	Ubiquitination of K (14)		Ubiquitination of K (14: 100.0)	Ubiquitination of K (14: 43.80952380952381)	1	12.7589	98.8304
2377	P49917	Single Protein	ADIQICILDGEMMAYNPNTQTFMQK	0	NH2-ADIQICILDGEM<ox>MAYNPNTQTFMQK<ub>-COOH	321	FK	GT	Oxidation of M (12), Ubiquitination of K (25)		Oxidation of M (12: 49.99999716968603, 13: 49.99999716968603, 23: 5.660627936905294E-6), Ubiquitination of K (25: 100.0)	Ubiquitination of K (25: 98.41269841269842)	1	13.2736	98.8506
262	P51610	Single Protein	LGHSFSLVGNKCYLFGGLANDSEDPK	1	NH2-LGHSFSLVGNK<longub>C<cmm>YLFGGLANDSEDPK<ub>-COOH	138	PR	NN	Carbamidomethylation of C (12), Long ubiquitination (11), Ubiquitination of K (26)		Carbamidomethylation of C (12: 100.0), Long ubiquitination (11: 50.0, 26: 50.0), Ubiquitination of K (11: 1.3614302501434722E-8, 26: 99.99999998638569)	Carbamidomethylation of C (12: 59.36507936507937), Long ubiquitination (11: 59.36507936507937), Ubiquitination of K (26: 59.36507936507937)	1	2.48178	61.4035
2386	P54646	Single Protein	AMKQLDFEWK	1	NH2-AMK<longub>QLDFEWK-COOH	422	YR	VV	Long ubiquitination (3)		Long ubiquitination (3: 99.99999999898131, 10: 1.018686996629329E-9)	Long ubiquitination (3: 17.460317460317466)	1	4.08125	71.8563
658	P60709	Related Proteins	DLTDYLMKILTER	1	NH2-DLTDYLMK<ub>ILTER-COOH	184; 186; 184; 185; 186; 186; 185	GR; GR; GR; GR; GR; GR; GR	GY; GY; GY; GY; GY; GY; GY	Ubiquitination of K (8)		Ubiquitination of K (8: 100.0)	Ubiquitination of K (8: 93.96825396825396)	1	21.7898	99.3976
142	P62805	Single Protein	GVLKVFLENVIR	1	NH2-GVLK<ub>VFLENVIR-COOH	57	TR	DA	Ubiquitination of K (4)		Ubiquitination of K (4: 100.0)	Ubiquitination of K (4: 88.25396825396825)	1	18.7795	99.6109
934	P63123	Single Protein	GLGKNEDGIKVPIEAK	2	NH2-GLGK<ub>NEDGIK<ub>VPIEAK-COOH	129	GK	IN	Ubiquitination of K (4, 10)		Ubiquitination of K (4: 99.9999860891108, 10: 99.96828588590226, 16: 0.03172802498692859)	Ubiquitination of K (4: 22.539682539682538, 10: 22.539682539682538)	1	6.76694	88.3041
1062	Q00796	Single Protein	AKEIGADLVLQISK	1	NH2-AK<ub>EIGADLVLQISK-COOH	213	SK	ES	Ubiquitination of K (2)		Ubiquitination of K (2: 99.9999996140399, 14: 3.8596010148528036E-7)	Ubiquitination of K (2: 99.36507936507937)	1	100	100
265	Q01118	Single Protein	LSDFAAALDPPLFMAKPNK	0	NH2-LSDFAAALDPPLFM<ox>AK<ub>PNK-COOH	1538	SK	GQ	Oxidation of M (14), Ubiquitination of K (16)		Oxidation of M (14: 100.0), Ubiquitination of K (16: 50.0, 19: 50.0)	Oxidation of M (14: 65.71428571428571)	1	2.48178	61.4035
2137	Q04637	Single Protein	CLMALKVPTTEKPTVTVNFR	1	NH2-CLM<ox>ALK<longub>VPTTEKPTVTVNFR-COOH	821	CR	KL	Long ubiquitination (6), Oxidation of M (3)		Long ubiquitination (6: 99.96346464093506, 12: 0.03653535906493855), Oxidation of M (3: 100.0)	Long ubiquitination (6: 9.841269841269842), Oxidation of M (3: 88.57142857142857)	1	4.98055	73.8095
2736	Q05682	Single Protein	GEKVEQKIEGK	2	NH2-GEKVEQKIEGK<ub>-COOH	406	IK	WV	Ubiquitination of K (11)		Ubiquitination of K (3: 2.006237132089209E-13, 7: 2.006237132089209E-13, 11: 99.99999999999959)	Ubiquitination of K (11: 14.28571428571429)	1	3.40128	63.5838
1810	Q07973	Single Protein	MMVTPVELHKSLNTKVWQDHTLAWDTIFK	2	NH2-MMVTPVELHK<ub>SLNTKVWQDHTLAWDTIFK-COOH	252	GR	SV	Ubiquitination of K (10)		Ubiquitination of K (10: 99.9993033738216, 15: 3.4831308919196425E-4, 29: 3.4831308919196425E-4)	Ubiquitination of K (10: 63.9384288747346)	1	4.52298	72.9412
2628	Q12872	Single Protein	KAALFLQTLK	1	NH2-K<ub>AALFLQTLK<ub>-COOH	686	KR	NP	Ubiquitination of K (1, 10)		Ubiquitination of K (1: 100.0, 10: 100.0)	Ubiquitination of K (1: 21.269841269841272, 10: 21.269841269841272)	1	4.94071	72.093
1880	Q12884	Single Protein	ISIGSYPPSKKCVTCHLR	2	NH2-ISIGSYPPSK<longub>KC<cmm>VTC<cmm>HLR-COOH	427	YR	KE	Carbamidomethylation of C (12, 15), Long ubiquitination (10)		Carbamidomethylation of C (12: 100.0, 15: 100.0), Long ubiquitination (10: 50.0, 11: 50.0)	Carbamidomethylation of C (12: 66.03174603174602, 15: 66.03174603174602), Long ubiquitination (10: 66.03174603174602)	1	2.39223	57.7381
1177	Q13127	Single Protein	EEASGDQKLLNTGEGNKEAPLQK	2	NH2-EEASGDQKLLNTGEGNK<longub>EAPLQK-COOH	874	LR	VG	Long ubiquitination (17)		Long ubiquitination (8: 49.98753982609389, 17: 99.96447037558373, 23: 0.024920347812231517)	Long ubiquitination (17: 53.740774441411375)	2	10.2633	92.2619
1063	Q13438	Single Protein	MAGASPTKDDSKDSDFWK	2	NH2-M<ox>AGASPTK<longub>DDSK<longub>DSDFWK-COOH	296	QK	ML	Long ubiquitination (8, 12), Oxidation of M (1)		Long ubiquitination (8: 99.99999999999993, 12: 99.99999999995536, 18: 4.4703309082758757E-11), Oxidation of M (1: 100.0)	Long ubiquitination (8: 63.8095238095238, 12: 63.8095238095238), Oxidation of M (1: 63.8095238095238)	1	2.39223	57.7381
1715	Q13574	Single Protein	FTFHSKEIVAISCSWCKQAYHSK	2	NH2-FTFHSKEIVAISC<cmm>SWC<cmm>K<longub>QAYHSK<longub>-COOH	384	QK	VS	Carbamidomethylation of C (16, 13), Long ubiquitination (17, 23)		Carbamidomethylation of C (13: 100.0, 16: 100.0), Long ubiquitination (6: 5.549831052312963E-10, 17: 99.9999999994464, 23: 99.99999999999864)	Carbamidomethylation of C (13: 82.85714285714285, 16: 82.85714285714285), Long ubiquitination (17: 82.85714285714285, 23: 82.85714285714285)	1	4.98055	73.8095
439	Q14118	Single Protein	KVVENGALLSWK	1	NH2-KVVENGALLSWK<ub>-COOH	250	AK	LG	Ubiquitination of K (12)		Ubiquitination of K (1: 1.7014848288825257E-11, 12: 99.99999999998298)	Ubiquitination of K (12: 19.68253968253968)	1	5.56718	80.9249
2562	Q14789	Single Protein	EKTKVESEIR	2	NH2-EK<ub>TKVESEIR-COOH	1978	VK	KE	Ubiquitination of K (2)		Ubiquitination of K (2: 50.0, 4: 50.0)	Ubiquitination of K (2: 6.0317460317460325)	1	3.20146	62.5
560	Q14CN4	Single Protein	SEIGNVKKQCADLETAIADAEQR	2	NH2-SEIGNVK<ub>K<ub>QC<cmm>ADLETAIADAEQR-COOH	355	IR	GD	Carbamidomethylation of C (10), Ubiquitination of K (8, 7)		Carbamidomethylation of C (10: 100.0), Ubiquitination of K (7: 100.0, 8: 100.0)	Carbamidomethylation of C (10: 99.04761904761905), Ubiquitination of K (7: 99.04761904761905, 8: 99.04761904761905)	1	14.523	97.076
390	Q15459	Single Protein	EGKAQEPSAAIPKVMQQQQQTTQQQLPQK	2	NH2-EGK<longub>AQEPSAAIPK<ub>VM<ox>QQQQQTTQQQLPQK<ub>-COOH	103	FK	VQ	Long ubiquitination (3), Oxidation of M (15), Ubiquitination of K (29, 13)		Long ubiquitination (3: 99.9999472846704, 13: 5.2715329550567166E-5, 29: 4.757444699348311E-14), Oxidation of M (15: 100.0), Ubiquitination of K (3: 0.07524024252292251, 13: 99.92475975747715, 29: 99.9999999999999)	Long ubiquitination (13: 59.682539682539684), Oxidation of M (15: 59.682539682539684), Ubiquitination of K (3: 59.682539682539684, 29: 59.682539682539684)	1	2.48178	61.4035
2799	Q15911	Single Protein	KLADMIASR	1	NH2-K<ub>LADM<ox>IASR-COOH	1714	RK	QQ	Oxidation of M (5), Ubiquitination of K (1)		Oxidation of M (5: 100.0), Ubiquitination of K (1: 100.0)	Oxidation of M (5: 31.11111111111111), Ubiquitination of K (1: 31.11111111111111)	1	9.74857	92.1526
1168	Q29983	Single Protein	DLTGNGKDLR	1	NH2-DLTGNGK<longub>DLR-COOH	88	TR	MT	Long ubiquitination (7)		Long ubiquitination (7: 100.0)	Long ubiquitination (7: 21.269841269841272)	1	5.87753	82.1429
301	Q2HXU8	Single Protein	ELDQINGSKGCAYFQKGNIYISR	2	NH2-ELDQINGSK<longub>GC<cmm>AYFQK<longub>GNIYISR-COOH	232	TK	CS	Carbamidomethylation of C (11), Long ubiquitination (16, 9)		Carbamidomethylation of C (11: 100.0), Long ubiquitination (9: 100.0, 16: 100.0)	Carbamidomethylation of C (11: 82.85714285714285), Long ubiquitination (9: 82.85714285714285, 16: 82.85714285714285)	2	4.67021	72.2892
743	Q2VPK5	Single Protein	APEKASIHRLMEAFILR	2	NH2-APEK<ub>ASIHRLMEAFILR-COOH	336	TK	LQ	Ubiquitination of K (4)		Ubiquitination of K (4: 100.0)	Ubiquitination of K (4: 6.349206349206349)	1	3.09745	60.36
612	Q309B1	Single Protein	TQVSAIVQRK	1	NH2-TQVSAIVQRK<ub>-COOH	129	IR	YW	Ubiquitination of K (10)		Ubiquitination of K (10: 100.0)	Ubiquitination of K (10: 10.158730158730156)	1	3.40128	63.5838
2643	Q4G0Z9	Single Protein	DKLEQLQTVLESR	1	NH2-DK<ub>LEQLQTVLESR-COOH	419	KK	SI	Ubiquitination of K (2)		Ubiquitination of K (2: 100.0)	Ubiquitination of K (2: 68.25396825396825)	1	18.7795	99.6109
1628	Q4JDL3	Single Protein	SKVFENKVNSEK	2	NH2-SK<ub>VFENK<ub>VNSEK-COOH	42	PR	VK	Ubiquitination of K (2, 7)		Ubiquitination of K (2: 99.99999898655153, 7: 50.000000506724234, 12: 50.000000506724234)	Ubiquitination of K (2: 40.63492063492063, 7: 40.63492063492063)	1	11.7898	95.7219
178	Q4V348	Related Proteins	EKPCDNNGCGRSYKSPLIGHQK	2	NH2-EK<longub>PC<cmm>DNNGCGRSYK<longub>SPLIGHQK<ub>-COOH	225; 465	TK; TK	TD; TD	Carbamidomethylation of C (4), Long ubiquitination (14, 2), Ubiquitination of K (22)		Carbamidomethylation of C (4: 50.0, 9: 50.0), Long ubiquitination (2: 99.99999990672312, 14: 99.99999999999928, 22: 9.327757724609045E-8), Ubiquitination of K (2: 8.102250535074876E-8, 14: 8.102250535074876E-8, 22: 99.99999983795499)	Long ubiquitination (2: 59.36507936507937, 14: 59.36507936507937), Ubiquitination of K (22: 59.36507936507937)	1	2.39223	57.7381
1442	Q5FVE4	Single Protein	KIPIISNAMLVGDK	1	NH2-K<ub>IPIISNAMLVGDK-COOH	536	KK	LK	Ubiquitination of K (1)		Ubiquitination of K (1: 99.99999662186062, 14: 3.378139379582548E-6)		1	2.49558	61.4035
284	Q5HYK7	Single Protein	QSNLATGLSKAK	1	NH2-QSNLATGLSK<ub>AK<ub>-COOH	377	KK	SQ	Ubiquitination of K (12, 10)		Ubiquitination of K (10: 100.0, 12: 100.0)	Ubiquitination of K (10: 33.96825396825397, 12: 33.96825396825397)	1	8.43025	91.6667
631	Q5JUK3	Single Protein	SDPLAHVASSSQSRKSSCSHK	2	NH2-SDPLAHVASSSQSRK<ub>SSC<cmm>SHK-COOH	1196	IR	LS	Carbamidomethylation of C (18), Ubiquitination of K (15)		Carbamidomethylation of C (18: 100.0), Ubiquitination of K (15: 99.94054293736836, 21: 0.05945706263163534)	Carbamidomethylation of C (18: 92.06349206349206), Ubiquitination of K (15: 92.06349206349206)	1	6.9897	87.0056
620	Q5QP82	Single Protein	MISSPHGYGIRLLGFDKQCSELVDCLPK	2	NH2-M<ox>ISSPHGYGIRLLGFDKQC<cmm>SELVDCLPK<longub>-COOH	486	GR	EA	Carbamidomethylation of C (19), Long ubiquitination (28), Oxidation of M (1)		Carbamidomethylation of C (19: 99.99999999682893, 25: 3.1710625173522516E-9), Long ubiquitination (17: 3.3111569092448028E-9, 28: 99.99999999668884), Oxidation of M (1: 100.0)	Carbamidomethylation of C (19: 93.33333333333333), Long ubiquitination (28: 93.33333333333333), Oxidation of M (1: 93.33333333333333)	1	7.53328	87.574
1844	Q5SYC1	Single Protein	LLAQYFEYRQQNLDMFKSFK	2	NH2-LLAQYFEYRQQNLDMFKSFK<ub>-COOH	71	FR	AT	Ubiquitination of K (20)		Ubiquitination of K (17: 0.03260822317660599, 20: 99.96739177682339)	Ubiquitination of K (20: 21.9047619047619)	1	8.50238	91.9075
2455	Q5T4D3	Single Protein	EQGITVLGLNAVFDILVIGKFNVLEIVQK	1	NH2-EQGITVLGLNAVFDILVIGK<ub>FNVLEIVQK<longub>-COOH	222	CK	VL	Long ubiquitination (29), Ubiquitination of K (20)		Long ubiquitination (20: 3.918932540554748E-6, 29: 99.99999608106745), Ubiquitination of K (20: 99.99999548938145, 29: 4.510618557103905E-6)	Long ubiquitination (29: 0.6349206349206349), Ubiquitination of K (20: 0.6349206349206349)	1	100	100
2236	Q5T655	Single Protein	NMLKAVNATQKQTDLVK	2	NH2-NMLKAVNATQK<ub>QTDLVK<ub>-COOH	392	NK	LH	Ubiquitination of K (17, 11)		Ubiquitination of K (4: 2.594755024849769E-9, 11: 99.99999999740633, 17: 99.9999999999989)	Ubiquitination of K (11: 91.11111111111111, 17: 91.11111111111111)	1	6.072	83.8323
279	Q5T6C5	Single Protein	KPGPALAFEEKCSTLK	1	NH2-KPGPALAFEEK<ub>C<cmm>STLK-COOH	703	RK	SK	Carbamidomethylation of C (12), Ubiquitination of K (11)		Carbamidomethylation of C (12: 100.0), Ubiquitination of K (1: 7.789810686169647E-18, 11: 99.98988082123813, 16: 0.010119178761867999)	Carbamidomethylation of C (12: 33.96825396825397), Ubiquitination of K (11: 33.96825396825397)	1	9.23704	91.8129
1973	Q5VTJ3	Single Protein	QNLEALKEAAYK	1	NH2-QNLEALK<ub>EAAYK<ub>-COOH	445	KR	VM	Ubiquitination of K (12, 7)		Ubiquitination of K (7: 100.0, 12: 100.0)	Ubiquitination of K (7: 40.0, 12: 40.0)	1	11.3758	95.4774
2043	Q5VYY2	Single Protein	FLLLPDMMIKGLFGKK	2	NH2-FLLLPDMMIK<ub>GLFGK<ub>K<ub>-COOH	228	TK	EF	Ubiquitination of K (16, 10, 15)		Ubiquitination of K (10: 100.0, 15: 100.0, 16: 100.0)	Ubiquitination of K (10: 66.34920634920634, 15: 66.34920634920634, 16: 66.34920634920634)	1	2.76206	64.2458
1235	Q685J3	Single Protein	SLVYGLVGAGVVLMLIILVALLMLVFRSKR	2	NH2-SLVYGLVGAGVVLM<ox>LIILVALLMLVFRSK<ub>R-COOH	4389	QK	EV	Oxidation of M (14), Ubiquitination of K (29)		Oxidation of M (14: 99.99950481837955, 23: 4.951816204486861E-4), Ubiquitination of K (29: 100.0)	Oxidation of M (14: 96.19047619047619), Ubiquitination of K (29: 96.19047619047619)	1	8.50238	91.9075
2272	Q68CP9	Single Protein	DALLAGLKQDEPGQAGSQK	1	NH2-DALLAGLKQDEPGQAGSQK<longub>-COOH	1694	SK	SS	Long ubiquitination (19)		Long ubiquitination (8: 1.5959987136352655E-8, 19: 99.99999998404002)	Long ubiquitination (19: 88.88888888888889)	1	5.49208	80.5822
1289	Q6IMN6	Single Protein	QPSSLASPNPPMAK	0	NH2-QPSSLASPNPPMAK<ub>-COOH	724	GK	GS	Ubiquitination of K (14)		Ubiquitination of K (14: 100.0)	Ubiquitination of K (14: 20.63492063492064)	1	5.56718	80.9249
2298	Q6IV72	Single Protein	LHSGEEPFQCPECDKSFSWKASMK	2	NH2-LHSGEEPFQC<cmm>PEC<cmm>DK<ub>SFSWKASMK-COOH	547	TR	FH	Carbamidomethylation of C (13, 10), Ubiquitination of K (15)		Carbamidomethylation of C (10: 100.0, 13: 100.0), Ubiquitination of K (15: 99.883503233537, 20: 0.11632611633803644, 24: 1.706501249634465E-4)	Carbamidomethylation of C (10: 65.39682539682539, 13: 65.39682539682539), Ubiquitination of K (15: 65.39682539682539)	1	2.39223	57.7381
1865	Q6P1N0	Single Protein	GLEPMLEASRNGLPVDITK	1	NH2-GLEPM<ox>LEASRNGLPVDITK<ub>-COOH	529	AK	VP	Oxidation of M (5), Ubiquitination of K (19)		Oxidation of M (5: 100.0), Ubiquitination of K (19: 100.0)	Oxidation of M (5: 90.47619047619048), Ubiquitination of K (19: 90.47619047619048)	1	5.86996	82.0894
1326	Q6P2I3	Related Proteins	GDEVQCEIEELGVIINK	0	NH2-GDEVQCEIEELGVIINK<ub>-COOH	296; 296	KK; KK	VV; VV	Ubiquitination of K (17)		Ubiquitination of K (17: 100.0)	Ubiquitination of K (17: 71.42857142857143)	3	3.8696	68.1465
2198	Q6PGP7	Single Protein	QKWCDVCKK	2	NH2-QK<longub>WC<cmm>DVC<cmm>K<ub>K-COOH	113	DK	LV	Carbamidomethylation of C (4, 7), Long ubiquitination (2), Ubiquitination of K (8)		Carbamidomethylation of C (4: 100.0, 7: 100.0), Long ubiquitination (2: 99.99999998852488, 8: 5.737562335057859E-9, 9: 5.737562335057859E-9), Ubiquitination of K (2: 2.618987036752714E-9, 8: 49.999999998690505, 9: 49.999999998690505)		1	2.54698	60.9195
498	Q6UWU2	Single Protein	IDNLVKWWFPLQLPKWPYPQAPSGPTFYSK	2	NH2-IDNLVK<ub>WWFPLQLPKWPYPQAPSGPTFYSK<longub>-COOH	514	LK	TF	Long ubiquitination (30, 6), Ubiquitination of K (6)		Long ubiquitination (6: 99.99083092099916, 15: 0.00916907908966711, 30: 99.99999999991115), Ubiquitination of K (6: 99.99999898482682, 15: 1.0151731786817905E-6, 30: 2.7866734525325975E-26)	Long ubiquitination (15: 99.36507936507937, 30: 99.36507936507937), Ubiquitination of K (6: 99.36507936507937)	1	16.2839	98.4615
1536	Q6ZN66	Single Protein	FMETTMNKKGDFLLQNEESSVQYCQAK	2	NH2-FMETTMNK<ub>KGDFLLQNEESSVQYCQAK<longub>-COOH	383	KK	LN	Long ubiquitination (27), Ubiquitination of K (8)		Long ubiquitination (8: 2.2240393546366622E-14, 9: 2.3413005519020572E-11, 27: 99.99999999997657), Ubiquitination of K (8: 99.94355641860338, 9: 0.056443556802273365, 27: 2.4594358955160958E-8)	Long ubiquitination (27: 62.18329794762916)	1	4.98055	73.8095
967	Q6ZS30	Single Protein	ELVNDVILPKWAKSAEDFIYK	2	NH2-ELVNDVILPK<longub>WAK<ub>SAEDFIYK<ub>-COOH	2181	SK	HR	Long ubiquitination (10), Ubiquitination of K (21, 13)		Long ubiquitination (10: 99.848200387594, 13: 0.1517996064262668, 21: 5.9797269201468245E-9), Ubiquitination of K (10: 0.14961077299825484, 13: 99.85068954038584, 21: 99.99969968661591)	Long ubiquitination (10: 82.53968253968253), Ubiquitination of K (13: 82.53968253968253, 21: 82.53968253968253)	1	3.38354	63.3136
308	Q6ZV70	Single Protein	FAQFLFTEEFKAGSR	1	NH2-FAQFLFTEEFK<longub>AGSR-COOH	369	QR	VL	Long ubiquitination (11)		Long ubiquitination (11: 100.0)	Long ubiquitination (11: 63.49206349206349)	1	2.39223	57.7381
1320	Q7Z2K8	Single Protein	EDPISAGSRKTSSEK	2	NH2-EDPISAGSRK<longub>TSSEK-COOH	464	RR	VN	Long ubiquitination (10)		Long ubiquitination (10: 99.98387458269504, 15: 0.01612541730497484)	Long ubiquitination (10: 6.349206349206349)	1	3.15825	62.5
2025	Q7Z2T5	Single Protein	VTKMDANVLMHLR	1	NH2-VTK<ub>M<ox>DANVLM<ox>HLR-COOH	353	IK	SF	Oxidation of M (4, 10), Ubiquitination of K (3)		Oxidation of M (4: 100.0, 10: 100.0), Ubiquitination of K (3: 100.0)	Oxidation of M (4: 21.58730158730159, 10: 21.58730158730159), Ubiquitination of K (3: 21.58730158730159)	1	5.20806	79.6407
1514	Q7Z6G8	Single Protein	MRANCQKSTEQMK	2	NH2-MRANC<cmm>QK<ub>STEQM<ox>K<ub>-COOH	1088	AK	KV	Carbamidomethylation of C (5), Oxidation of M (12), Ubiquitination of K (13, 7)		Carbamidomethylation of C (5: 100.0), Oxidation of M (1: 5.052703173082952E-5, 12: 99.99994947296827), Ubiquitination of K (7: 100.0, 13: 100.0)		1	2.70647	63.0753
150	Q86WI3	Single Protein	ALMRALEGKWMLK	2	NH2-ALM<ox>RALEGK<longub>WMLK<ub>-COOH	1541	TK	RL	Long ubiquitination (9), Oxidation of M (3), Ubiquitination of K (13)		Long ubiquitination (9: 99.97150708279013, 13: 0.02849291720987231), Oxidation of M (3: 99.99999999999768, 11: 2.3142375733801056E-12), Ubiquitination of K (9: 0.026910348918660846, 13: 99.97308965108135)	Oxidation of M (3: 18.73015873015873)	1	5.25764	80.2326
2184	Q86Y13	Single Protein	RYNGGLLEFHKSLQEIGDK	2	NH2-RYNGGLLEFHK<ub>SLQEIGDK<ub>-COOH	194	QK	ND	Ubiquitination of K (11, 19)		Ubiquitination of K (11: 100.0, 19: 100.0)	Ubiquitination of K (11: 93.96825396825396, 19: 93.96825396825396)	1	7.83291	88.7574
1745	Q8IUZ0	Single Protein	NSYMKLCLQQITDQK	1	NH2-NSYM<ox>KLC<cmm>LQQITDQK<ub>-COOH	672	NK		Carbamidomethylation of C (7), Oxidation of M (4), Ubiquitination of K (15)		Carbamidomethylation of C (7: 100.0), Oxidation of M (4: 100.0), Ubiquitination of K (5: 2.7205136522181017E-10, 15: 99.99999999972795)		1	2.54698	60.9195
1478	Q8IV35	Single Protein	AKQLCQEKSCEVK	2	NH2-AK<ub>QLCQEK<longub>SCEVK-COOH	681	RK	KN	Long ubiquitination (8), Ubiquitination of K (2)		Long ubiquitination (2: 1.960014828125442E-10, 8: 99.99999875945991, 13: 1.2403440785912697E-6), Ubiquitination of K (2: 99.99999999981954, 8: 1.8043293942154888E-10, 13: 3.7841223338159843E-14)	Long ubiquitination (8: 69.33070468102315), Ubiquitination of K (2: 91.11111111111111)	1	6.28389	85.3107
1682	Q8IVL1	Single Protein	LQSLTMTAEQKDSELNELR	1	NH2-LQSLTM<ox>TAEQK<ub>DSELNELR-COOH	1735	IR	KT	Oxidation of M (6), Ubiquitination of K (11)		Oxidation of M (6: 100.0), Ubiquitination of K (11: 100.0)	Oxidation of M (6: 66.03174603174602), Ubiquitination of K (11: 66.03174603174602)	1	2.57321	60.452
2194	Q8IW75	Single Protein	IDKPYLLLIYSEKIPSVLFLGKIVNPIGK	2	NH2-IDKPYLLLIYSEK<longub>IPSVLFLGK<longub>IVNPIGK-COOH	386	VK		Long ubiquitination (13, 22)		Long ubiquitination (3: 0.18796288918883142, 13: 99.99959249200938, 22: 99.8120381380785, 29: 4.0648072326322966E-4)	Long ubiquitination (3: 0.6349206349206354, 13: 74.44444444444444)	1	9.75176	92.3977
461	Q8N0S6	Single Protein	GLAVEVGEDFNIKVIFSTLLGMK	1	NH2-GLAVEVGEDFNIKVIFSTLLGMK<ub>-COOH	106	QK	GT	Ubiquitination of K (23)		Ubiquitination of K (13: 1.0913161089005446E-8, 23: 99.99999998908685)	Ubiquitination of K (23: 89.2063492063492)	1	6.28389	85.3107
678	Q8N4N3	Single Protein	VKPAVCSLLPK	0	NH2-VK<ub>PAVCSLLPK<ub>-COOH	249	HR	EA	Ubiquitination of K (2, 11)		Ubiquitination of K (2: 100.0, 11: 100.0)	Ubiquitination of K (2: 13.015873015873014, 11: 13.015873015873014)	2	6.03731	82.4555
1776	Q8N4W9	Single Protein	CSECSKTFSQK	1	NH2-C<cmm>SEC<cmm>SK<ub>TFSQK-COOH	737	YK	AT	Carbamidomethylation of C (4, 1), Ubiquitination of K (6)		Carbamidomethylation of C (1: 100.0, 4: 100.0), Ubiquitination of K (6: 99.99999082044168, 11: 9.179558315753096E-6)	Carbamidomethylation of C (1: 5.0793650793650835, 4: 5.0793650793650835), Ubiquitination of K (6: 5.0793650793650835)	1	2.98163	64.2458
447	Q8NEB9	Single Protein	NAQVALTIWDVYGPGKAVPVGGTTVSLFGK	1	NH2-NAQVALTIWDVYGPGK<ub>AVPVGGTTVSLFGK-COOH	103	PR	YG	Ubiquitination of K (16)		Ubiquitination of K (16: 99.99995802989626, 30: 4.197010372708337E-5)	Ubiquitination of K (16: 61.904761904761905)	1	7.53328	87.574
650	Q8NEP4	Single Protein	ASLSPPSPPKEFPSWAPLSEVPQTPKHTCK	2	NH2-ASLSPPSPPK<ub>EFPSWAPLSEVPQTPKHTCK-COOH	480	EK	QP	Ubiquitination of K (10)		Ubiquitination of K (10: 33.33333333333333, 26: 33.33333333333333, 30: 33.33333333333333)	Ubiquitination of K (10: 63.8095238095238)	1	2.39223	57.7381
1864	Q8TAE8	Single Protein	EREQHIAECMAK	1	NH2-EREQHIAECM<ox>AK<longub>-COOH	116	RR	MP	Long ubiquitination (12), Oxidation of M (10)		Long ubiquitination (12: 100.0), Oxidation of M (10: 100.0)		1	3.11546	60.479
237	Q8TCN5	Single Protein	FLMNTEMEEGKDLSLTEAQIGREGMDDVYR	2	NH2-FLMNTEMEEGK<ub>DLSLTEAQIGREGMDDVYR-COOH	414	KR	AD	Ubiquitination of K (11)		Ubiquitination of K (11: 100.0)	Ubiquitination of K (11: 59.04761904761905)	2	2.39223	57.7381
1303	Q8TDU5	Single Protein	VMRGVSICTTCLLSVLQAITISPSTSFLEK	1	NH2-VMRGVSIC<cmm>TTCLLSVLQAITISPSTSFLEK<longub>-COOH	95	NR	FK	Carbamidomethylation of C (8), Long ubiquitination (30)		Carbamidomethylation of C (8: 99.99997804308258, 11: 2.195691743314887E-5), Long ubiquitination (30: 100.0)	Carbamidomethylation of C (8: 47.83439490445859), Long ubiquitination (30: 80.0)	1	2.66661	57.485
1119	Q8TDX5	Single Protein	KYLGSFYTDALVHDPLSLKLLTDVIGK	2	NH2-K<longub>YLGSFYTDALVHDPLSLK<longub>LLTDVIGK-COOH	257	PK	DK	Long ubiquitination (1, 19)		Long ubiquitination (1: 99.99999426299657, 19: 99.99999996685992, 27: 5.770143520181948E-6)	Long ubiquitination (1: 96.19047619047619, 19: 96.19047619047619)	1	8.50238	91.9075
1699	Q8TF64	Single Protein	CPVEAKVTSGRETLR	2	NH2-C<cmm>PVEAK<ub>VTSGRETLR-COOH	209	SK	LR	Carbamidomethylation of C (1), Ubiquitination of K (6)		Carbamidomethylation of C (1: 100.0), Ubiquitination of K (6: 100.0)	Carbamidomethylation of C (1: 9.84126984126984), Ubiquitination of K (6: 9.84126984126984)	1	4.11661	73.0539
2044	Q8WVX9	Single Protein	KHIDEVVYPPPVDPK	1	NH2-K<ub>HIDEVVYPPPVDPK<ub>-COOH	161	NR	KL	Ubiquitination of K (1, 15)		Ubiquitination of K (1: 100.0, 15: 100.0)	Ubiquitination of K (1: 20.63492063492064, 15: 20.63492063492064)	1	4.54701	72.9412
1350	Q8WWK9	Single Protein	QKQDANMPKKPVLGSYR	2	NH2-QKQDANMPK<ub>K<longub>PVLGSYR-COOH	164	EK	GQ	Long ubiquitination (10), Ubiquitination of K (9)		Long ubiquitination (2: 0.0066395366978618895, 9: 49.99999800776479, 10: 49.99999800776479), Ubiquitination of K (2: 3.6455303996648573E-6, 9: 49.99999999991993, 10: 49.99999999991993)		2	100	100
686	Q8WWL7	Single Protein	ICHFRKPPVLQTTICGAMSSIKKPTTEK	2	NH2-ICHFRKPPVLQTTIC<cmm>GAMSSIK<ub>K<ub>PTTEK-COOH	296	GK	ET	Carbamidomethylation of C (15), Ubiquitination of K (22, 23)		Carbamidomethylation of C (2: 7.18540373655552E-19, 15: 100.0), Ubiquitination of K (6: 1.7278089444722287E-17, 22: 66.66666666666667, 23: 66.66666666666667, 28: 66.66666666666667)	Carbamidomethylation of C (15: 88.88888888888889), Ubiquitination of K (22: 88.88888888888889, 23: 88.88888888888889)	1	5.31479	80.4734
2172	Q8WXA3	Single Protein	HEIELAMKLLEK	1	NH2-HEIELAMK<ub>LLEK-COOH	327	MK	DI	Ubiquitination of K (8)		Ubiquitination of K (8: 99.99719207373641, 12: 0.0028079262635912305)	Ubiquitination of K (8: 23.492063492063497)	1	6.34909	85.3107
2731	Q92616	Single Protein	EQIIELELKEEIKK	2	NH2-EQIIELELK<ub>EEIK<ub>K-COOH	803	FK	KK	Ubiquitination of K (9, 13)		Ubiquitination of K (9: 66.66666666666666, 13: 66.66666666666666, 14: 66.66666666666666)		1	8.36554	91.0714
57	Q92817	Single Protein	AGLQADLEVAAQKVVQLESKR	2	NH2-AGLQADLEVAAQK<ub>VVQLESK<ub>R-COOH	987	RR	KT	Ubiquitination of K (20, 13)		Ubiquitination of K (13: 100.0, 20: 100.0)	Ubiquitination of K (13: 98.41269841269842, 20: 98.41269841269842)	1	13.2736	98.8506
2613	Q92913	Single Protein	SVSGVLNGGKSMSHNEST	1	NH2-SVSGVLNGGK<ub>SM<ox>SHNEST-COOH	228	SR		Oxidation of M (12), Ubiquitination of K (10)		Oxidation of M (12: 100.0), Ubiquitination of K (10: 100.0)	Oxidation of M (12: 80.0), Ubiquitination of K (10: 80.0)	2	2.66661	57.485
1132	Q96AG3	Single Protein	EGIGRVIGMGVPHSK	1	NH2-EGIGRVIGM<ox>GVPHSK<longub>-COOH	242	VK	RL	Long ubiquitination (15), Oxidation of M (9)		Long ubiquitination (15: 100.0), Oxidation of M (9: 100.0)		2	3.92802	68.1465
1435	Q96BT7	Single Protein	KETPPSFPESDKEASR	2	NH2-K<ub>ETPPSFPESDK<ub>EASR-COOH	354	QR	LE	Ubiquitination of K (12, 1)		Ubiquitination of K (1: 100.0, 12: 100.0)	Ubiquitination of K (1: 20.952380952380956, 12: 20.952380952380956)	1	5.79784	81.0651
2435	Q96CQ1	Single Protein	MGAFECVRKVYQTDGLK	2	NH2-MGAFECVRK<longub>VYQTDGLK<ub>-COOH	158	RR	GF	Long ubiquitination (9), Ubiquitination of K (17)		Long ubiquitination (9: 99.99999508470721, 17: 4.915292791960538E-6), Ubiquitination of K (9: 3.7462030881446114E-6, 17: 99.99999625379691)	Long ubiquitination (9: 88.88888888888889), Ubiquitination of K (17: 88.88888888888889)	1	5.31479	80.4734
100	Q96DZ5	Single Protein	TGTLRFCGTTEFASGQWVGVELDEPEGK	1	NH2-TGTLRFCGTTEFASGQWVGVELDEPEGK<ub>-COOH	307	QK	ND	Ubiquitination of K (28)		Ubiquitination of K (28: 100.0)	Ubiquitination of K (28: 91.11111111111111)	1	6.50665	86.2275
1950	Q96M69	Single Protein	DSLVSMKCSLFR	1	NH2-DSLVSMK<ub>C<cmm>SLFR-COOH	736	GK	FC	Carbamidomethylation of C (8), Ubiquitination of K (7)		Carbamidomethylation of C (8: 100.0), Ubiquitination of K (7: 100.0)	Carbamidomethylation of C (8: 27.61904761904762), Ubiquitination of K (7: 27.61904761904762)	2	13.0184	98.8613
2621	Q96MC4	Single Protein	QLESLEQMEHPDMSLEIHYKAELEKER	2	NH2-QLESLEQMEHPDMSLEIHYK<longub>AELEKER-COOH	516	QK	RE	Long ubiquitination (20)		Long ubiquitination (20: 99.99999999911495, 25: 8.850527194498179E-10)	Long ubiquitination (20: 86.98412698412699)	1	4.98055	73.8095
2108	Q96N16	Single Protein	EQLQADLLRCQAKIEDLEK	2	NH2-EQLQADLLRC<cmm>QAKIEDLEK<ub>-COOH	523	TR	LL	Carbamidomethylation of C (10), Ubiquitination of K (19)		Carbamidomethylation of C (10: 100.0), Ubiquitination of K (13: 6.021798427566678E-13, 19: 99.9999999999994)	Carbamidomethylation of C (10: 91.11111111111111), Ubiquitination of K (19: 91.11111111111111)	1	6.072	83.8323
1805	Q96N23	Single Protein	FKAAVMEIGRSAEMQQR	2	NH2-FK<ub>AAVMEIGRSAEM<ox>QQR-COOH	1396	LK	IR	Oxidation of M (14), Ubiquitination of K (2)		Oxidation of M (6: 2.644751176071773E-6, 14: 99.99999735524882), Ubiquitination of K (2: 100.0)	Oxidation of M (14: 15.873015873015872), Ubiquitination of K (2: 15.873015873015872)	1	3.40128	63.5838
999	Q96PP4	Single Protein	REKGMVVNSK	2	NH2-REK<longub>GMVVNSK<ub>-COOH	24	AK	EI	Long ubiquitination (3), Ubiquitination of K (10)		Long ubiquitination (3: 99.99999565698818, 10: 4.343011823004626E-6), Ubiquitination of K (3: 4.195177303099983E-6, 10: 99.99999580482269)	Long ubiquitination (3: 15.238095238095239), Ubiquitination of K (10: 15.238095238095239)	1	3.20146	62.5
350	Q96RY7	Single Protein	GVQMDRAVMLYHKAGHFSK	2	NH2-GVQM<ox>DRAVMLYHKAGHFSK<ub>-COOH	1078	EK	AL	Oxidation of M (4), Ubiquitination of K (19)		Oxidation of M (4: 99.99998478156108, 9: 50.0), Ubiquitination of K (13: 0.0359177325927856, 19: 99.99996411680307)	Oxidation of M (4: 82.53968253968253), Ubiquitination of K (19: 82.53968253968253)	2	5.30051	80.4734
2442	Q99965	Single Protein	IFSNCSFEDFAHFISKQKSQCLHNQPR	2	NH2-IFSNC<cmm>SFEDFAHFISKQK<longub>SQCLHNQPR-COOH	350	VK	LD	Carbamidomethylation of C (5), Long ubiquitination (18)		Carbamidomethylation of C (5: 99.99979730906432, 21: 50.0), Long ubiquitination (16: 0.2869176315981237, 18: 99.99980099065155)	Carbamidomethylation of C (5: 75.87301587301587), Long ubiquitination (18: 75.87301587301587)	3	3.48293	63.6364
2429	Q9BPV8	Single Protein	QRELSILPK	1	NH2-QRELSILPK<ub>-COOH	8	RR	VT	Ubiquitination of K (9)		Ubiquitination of K (9: 100.0)	Ubiquitination of K (9: 22.22222222222222)	1	4.88781	71.7608
2390	Q9BPX7	Single Protein	DKELFACESAVKDFQSILDTLGGPGER	2	NH2-DK<longub>ELFAC<cmm>ESAVK<ub>DFQSILDTLGGPGER-COOH	298	MK	ER	Carbamidomethylation of C (7), Long ubiquitination (2), Ubiquitination of K (12)		Carbamidomethylation of C (7: 100.0), Long ubiquitination (2: 99.51940369546236, 12: 0.4805963045376404), Ubiquitination of K (2: 0.4805963045376404, 12: 99.51940369546236)	Carbamidomethylation of C (7: 66.03174603174602), Long ubiquitination (2: 66.03174603174602), Ubiquitination of K (12: 66.03174603174602)	1	2.57321	60.452
764	Q9BT92	Single Protein	EEKKQQEATAEQENK	2	NH2-EEK<ub>K<ub>QQEATAEQENK-COOH	171	QK	RY	Ubiquitination of K (4, 3)		Ubiquitination of K (3: 99.99999978462603, 4: 99.99999978462603, 15: 66.66666666666667)		3	4.89315	71.7608
581	Q9BXA5	Single Protein	MLGIMAWNATCKNWLAAEAALEK	1	NH2-MLGIMAWNATCK<longub>NWLAAEAALEK-COOH	1		YY	Long ubiquitination (12)		Long ubiquitination (12: 99.99960495339937, 23: 3.9504660062072766E-4)	Long ubiquitination (12: 86.66666666666667)	1	4.98055	73.8095
1920	Q9C0B2	Single Protein	ELQVGCIRTTQPSPK	1	NH2-ELQVGCIRTTQPSPK<ub>-COOH	1536	TR	KP	Ubiquitination of K (15)		Ubiquitination of K (15: 100.0)	Ubiquitination of K (15: 68.25396825396825)	2	29.1934	100
625	Q9H0A0	Single Protein	LFNEVQEKAIEEQMVAAK	1	NH2-LFNEVQEKAIEEQM<ox>VAAK<ub>-COOH	905	VK	DV	Oxidation of M (14), Ubiquitination of K (18)		Oxidation of M (14: 100.0), Ubiquitination of K (8: 4.33780461904723E-10, 18: 99.99999999981998)	Oxidation of M (14: 66.03174603174602), Ubiquitination of K (18: 66.03174603174602)	2	2.48178	61.4035
1380	Q9H0C5	Single Protein	KQTLGQNDTGFSCDGTANTFRVMFK	2	NH2-K<longub>QTLGQNDTGFSCDGTANTFRVM<ox>FK<ub>-COOH	388	EK	EP	Long ubiquitination (1), Oxidation of M (23), Ubiquitination of K (25)		Long ubiquitination (1: 100.0, 25: 3.433320345613003E-13), Oxidation of M (23: 100.0), Ubiquitination of K (1: 1.9934594922931208E-19, 25: 100.0)	Long ubiquitination (1: 74.28571428571429), Oxidation of M (23: 74.28571428571429), Ubiquitination of K (25: 74.28571428571429)	2	4.52638	72.9412
1764	Q9H173	Single Protein	FKEGAEMESSKEDK	2	NH2-FK<ub>EGAEMESSKEDK-COOH	138	AK	AR	Ubiquitination of K (2)		Ubiquitination of K (2: 99.99999999721024, 11: 1.3948752217173393E-9, 14: 1.3948752217173393E-9)	Ubiquitination of K (2: 11.111111111111116)	1	3.70756	65.7655
2581	Q9H2C8	Single Protein	LFQTCISHICAVLVFYIPIISLTMVHRFGK	1	NH2-LFQTC<cmm>ISHIC<cmm>AVLVFYIPIISLTM<ox>VHRFGK<longub>-COOH	246	HK	HL	Carbamidomethylation of C (10, 5), Long ubiquitination (30), Oxidation of M (24)		Carbamidomethylation of C (5: 100.0, 10: 100.0), Long ubiquitination (30: 100.0), Oxidation of M (24: 100.0)	Carbamidomethylation of C (5: 70.15873015873015, 10: 70.15873015873015), Long ubiquitination (30: 70.15873015873015), Oxidation of M (24: 70.15873015873015)	1	2.76206	64.2458
872	Q9H4A3	Single Protein	SGSGGGSAKEPQEER	1	NH2-SGSGGGSAK<ub>EPQEER-COOH	183	AR	SQ	Ubiquitination of K (9)		Ubiquitination of K (9: 100.0)	Ubiquitination of K (9: 22.857142857142854)	1	7.51945	85.7988
1592	Q9H4M9	Related Proteins	NAALRKLNDLIK	2	NH2-NAALRK<ub>LNDLIK-COOH	288; 288	PR; PR	RA; RA	Ubiquitination of K (6)		Ubiquitination of K (6: 99.99999367301717, 12: 6.326982823434295E-6)	Ubiquitination of K (6: 33.333333333333336)	1	10.0289	92.8962
1279	Q9H7D0	Single Protein	TPKNVEVTMSVHDEEGK	1	NH2-TPKNVEVTM<ox>SVHDEEGK<ub>-COOH	462	KK	LL	Oxidation of M (9), Ubiquitination of K (17)		Oxidation of M (9: 100.0), Ubiquitination of K (3: 2.7586625113783024E-12, 17: 100.0)		2	2.77954	64.2458
1301	Q9H8V3	Single Protein	KSVSMLSLNTPNSNR	1	NH2-K<ub>SVSMLSLNTPNSNR-COOH	364	LK	KR	Ubiquitination of K (1)		Ubiquitination of K (1: 100.0)	Ubiquitination of K (1: 62.857142857142854)	1	17.1809	98.2857
1943	Q9HB96	Single Protein	DQPVMAVKTGEDGSNLDDAKGLAESLELPK	2	NH2-DQPVM<ox>AVK<ub>TGEDGSNLDDAKGLAESLELPK<ub>-COOH	253	IK	AI	Oxidation of M (5), Ubiquitination of K (30, 8)		Oxidation of M (5: 100.0), Ubiquitination of K (8: 50.00014080520143, 20: 50.00014080520143, 30: 99.99971838959713)	Oxidation of M (5: 66.34920634920634), Ubiquitination of K (8: 66.34920634920634, 30: 66.34920634920634)	1	2.39223	57.7381
2697	Q9HBG4	Single Protein	EMITLETVLEK	0	NH2-EMITLETVLEK<ub>-COOH	92	PR	LE	Ubiquitination of K (11)		Ubiquitination of K (11: 100.0)		1	3.11546	60.479
1439	Q9HC77	Single Protein	EGAYKDPLFK	1	NH2-EGAYK<longub>DPLFK-COOH	135	FK	KL	Long ubiquitination (5)		Long ubiquitination (5: 100.0, 10: 1.0374309418298799E-17)	Long ubiquitination (5: 14.603174603174606)	1	3.20146	62.5
736	Q9HCM4	Single Protein	KAKGQELFDQIMYHLDLIESDYFGLR	2	NH2-K<ub>AKGQELFDQIMYHLDLIESDYFGLR-COOH	62	PK	FM	Ubiquitination of K (1)		Ubiquitination of K (1: 99.95258948087624, 3: 0.0474105191237632)	Ubiquitination of K (3: 0.3174603174603177)	1	5.14446	77.7778
2817	Q9HCU4	Single Protein	KCLPTISEKSSLLR	2	NH2-K<ub>C<cmm>LPTISEKSSLLR-COOH	2842	KK	LP	Carbamidomethylation of C (2), Ubiquitination of K (1)		Carbamidomethylation of C (2: 100.0), Ubiquitination of K (1: 50.0, 9: 50.0)	Carbamidomethylation of C (2: 28.888888888888886)	1	7.51945	85.7988
1397	Q9NR99	Single Protein	FYHKADGMLHISGLSSVDAGAYR	1	NH2-FYHK<longub>ADGMLHISGLSSVDAGAYR-COOH	2593	QR	CV	Long ubiquitination (4)		Long ubiquitination (4: 100.0)	Long ubiquitination (4: 98.73015873015873)	1	14.523	97.076
1472	Q9NRS6	Single Protein	GAEDLLRFTVHIPALNNSPQLKEFFR	2	NH2-GAEDLLRFTVHIPALNNSPQLK<longub>EFFR-COOH	99	RK	GG	Long ubiquitination (22)		Long ubiquitination (22: 100.0)	Long ubiquitination (22: 96.19047619047619)	2	9.42384	91.5663
1584	Q9NS91	Single Protein	QVTKVDCPVCGVNIPESHINKHLDSCLSR	2	NH2-QVTK<longub>VDCPVCGVNIPESHINK<ub>HLDSCLSR-COOH	198	LK	EE	Long ubiquitination (4), Ubiquitination of K (21)		Long ubiquitination (4: 99.9998922704959, 21: 1.0772950409377189E-4), Ubiquitination of K (4: 1.0772950409377189E-4, 21: 99.9998922704959)	Long ubiquitination (4: 79.36507936507937), Ubiquitination of K (21: 79.36507936507937)	1	2.66661	57.485
2416	Q9NTI2	Single Protein	AEIKIWVLTGDK	1	NH2-AEIK<longub>IWVLTGDK<ub>-COOH	657	LK	QE	Long ubiquitination (4), Ubiquitination of K (12)		Long ubiquitination (4: 99.99999999416359, 12: 5.8364105446174426E-9), Ubiquitination of K (4: 9.877021334901355E-6, 12: 99.99999012297866)	Long ubiquitination (4: 3.4920634920634908), Ubiquitination of K (12: 3.4920634920634908)	1	3.11546	60.479
598	Q9NZN9	Single Protein	EKPWEVQWLKLEK	1	NH2-EK<ub>PWEVQWLKLEK-COOH	215	TK	MI	Ubiquitination of K (2)		Ubiquitination of K (2: 99.99999763217396, 10: 2.3678256330243875E-6, 13: 4.017946930033257E-13)	Ubiquitination of K (2: 16.825396825396822)	1	4.08125	71.8563
628	Q9P1Z0	Single Protein	AFHGISPGLLASEKTPNGGYKPK	1	NH2-AFHGISPGLLASEK<longub>TPNGGYKPK<ub>-COOH	386	QR	LN	Long ubiquitination (14), Ubiquitination of K (23, 14)		Long ubiquitination (14: 99.99996103373213, 21: 3.896624094341339E-5, 23: 2.6912678838292342E-11), Ubiquitination of K (14: 99.94313117440687, 21: 0.056905537466832745, 23: 99.9999632881263)	Long ubiquitination (14: 65.39682539682539), Ubiquitination of K (21: 65.39682539682539, 23: 65.39682539682539)	1	2.57321	60.452
383	Q9P2L0	Single Protein	IADEEAKKGSKPLR	2	NH2-IADEEAK<ub>K<ub>GSKPLR-COOH	953	FK	VK	Ubiquitination of K (8, 7)		Ubiquitination of K (7: 99.9184871681533, 8: 99.9184871681533, 11: 0.16302566369338856)	Ubiquitination of K (7: 23.492063492063497, 8: 23.492063492063497)	1	6.73827	87.4251
2751	Q9UBT7	Single Protein	GEKYGYLSLPKPMKNNANLK	2	NH2-GEKYGYLSLPK<ub>PMKNNANLK-COOH	531	RR	SL	Ubiquitination of K (11)		Ubiquitination of K (3: 3.6920824489416195E-6, 11: 33.33333210263918, 14: 33.33333210263918, 20: 33.33333210263918)	Ubiquitination of K (11: 34.07794965119806)	1	2.39223	57.7381
1058	Q9UFE4	Single Protein	AAQEKEELQREGDCLDAK	2	NH2-AAQEKEELQREGDCLDAK<ub>-COOH	667	IK	IN	Ubiquitination of K (18)		Ubiquitination of K (5: 3.541988323388403E-6, 18: 99.99999826200057)		2	2.65691	58.1543
552	Q9UIH9	Single Protein	NPAAELIKMHKCTFPGCSK	2	NH2-NPAAELIKMHK<ub>C<cmm>TFPGCSK<longub>-COOH	312	PK	MY	Carbamidomethylation of C (12), Long ubiquitination (19), Ubiquitination of K (11)		Carbamidomethylation of C (12: 99.95640814019565, 17: 0.04359185980434645), Long ubiquitination (8: 2.7702772019362382E-5, 11: 0.048341634075925004, 19: 99.95163066315205), Ubiquitination of K (8: 33.33333333333333, 11: 33.33333333333333, 19: 33.33333333333333)	Carbamidomethylation of C (17: 7.314225053078554), Long ubiquitination (19: 12.083712465878069), Ubiquitination of K (11: 5.396825396825396)	1	16.2839	98.4615
395	Q9UJW7	Single Protein	KDCIKNSVLHR	2	NH2-K<longub>DC<cmm>IKNSVLHR-COOH	247	CR	IN	Carbamidomethylation of C (3), Long ubiquitination (1)		Carbamidomethylation of C (3: 100.0), Long ubiquitination (1: 99.9839229083974, 5: 0.01607709160259676)		1	2.59239	60.6729
831	Q9ULE4	Single Protein	SEKEIKQLEEEK	2	NH2-SEK<ub>EIKQLEEEK-COOH	472	KK	AA	Ubiquitination of K (3)		Ubiquitination of K (3: 49.99998254343695, 6: 49.99998254343695, 12: 3.4913126098605213E-5)	Ubiquitination of K (3: 33.333333333333336)	1	9.48528	91.6667
1215	Q9ULM3	Single Protein	TPTKMTTSQKVTFCSHGNSAFQPIASSCK	2	NH2-TPTKMTTSQKVTFCSHGNSAFQPIASSCK<longub>-COOH	407	ER	IV	Long ubiquitination (29)		Long ubiquitination (4: 1.8225586977492813E-11, 10: 1.1670696055639132E-6, 29: 99.99999883291217)	Long ubiquitination (29: 88.25396825396825)	1	4.98055	73.8095
1603	Q9ULM6	Single Protein	SWIMLQEPDRTRPTALFSVMCYNVLCDK	1	NH2-SWIM<ox>LQEPDRTRPTALFSVM<ox>CYNVLCDK<longub>-COOH	173	PR	YA	Long ubiquitination (28), Oxidation of M (4, 20)		Long ubiquitination (28: 100.0), Oxidation of M (4: 100.0, 20: 100.0)	Long ubiquitination (28: 85.07936507936508), Oxidation of M (4: 85.07936507936508, 20: 85.07936507936508)	2	6.9508	87.0056
1309	Q9ULV0	Single Protein	NLVTDLKPQMLSGTVPCLPAYILYMCIR	0	NH2-NLVTDLK<ub>PQMLSGTVPC<cmm>LPAYILYMCIR-COOH	1483	IR	HA	Carbamidomethylation of C (17), Ubiquitination of K (7)		Carbamidomethylation of C (17: 99.99996844883687, 26: 3.155116312636436E-5), Ubiquitination of K (7: 100.0)	Carbamidomethylation of C (17: 94.28571428571428), Ubiquitination of K (7: 94.28571428571428)	1	7.53328	87.574
1569	Q9UPN3	Single Protein	SKAAKELAENK	2	NH2-SK<ub>AAKELAENK-COOH	3739	EK	KK	Ubiquitination of K (2)		Ubiquitination of K (2: 99.99999999997198, 5: 2.8024611723115414E-11, 11: 3.396531477204792E-15)	Ubiquitination of K (2: 22.539682539682538)	1	7.51945	85.7988
2430	Q9Y2W2	Single Protein	KSEDDSAVPLAK	1	NH2-KSEDDSAVPLAK<longub>-COOH	599	QR	AA	Long ubiquitination (12)		Long ubiquitination (1: 1.4771520190608107E-13, 12: 99.99999999999986)	Long ubiquitination (12: 32.06349206349206)	1	10.0289	92.8962
446	Q9Y3R5	Single Protein	SIIDHLLTHEKTMFK	1	NH2-SIIDHLLTHEK<ub>TMFK-COOH	1993	WK	DL	Ubiquitination of K (11)		Ubiquitination of K (11: 99.99999715411661, 15: 2.8458833772048345E-6)	Ubiquitination of K (11: 20.317460317460323)	1	4.15549	72.7811
754	Q9Y496	Single Protein	SEKPESCDNVK	0	NH2-SEK<longub>PESCDNVK-COOH	6	NK	VV	Long ubiquitination (3)		Long ubiquitination (3: 100.0, 11: 1.969555491415493E-14)	Long ubiquitination (3: 19.999999999999996)	2	6.82749	87.466
1615	Q9Y4F4	Single Protein	VLADNKLVIK	1	NH2-VLADNK<ub>LVIK-COOH	443	VK	QE	Ubiquitination of K (6)		Ubiquitination of K (6: 99.99999969829676, 10: 3.0170324581804507E-7)	Ubiquitination of K (6: 68.88888888888889)	1	18.7795	99.6109
365	Q9Y623	Single Protein	SAMKTLAFLFSGAQTAEAEGGGGKK	2	NH2-SAMKTLAFLFSGAQTAEAEGGGGKK<ub>-COOH	615	QK	GG	Ubiquitination of K (25)		Ubiquitination of K (4: 33.333333333333336, 24: 50.0, 25: 99.99306447328533)		3	4.21722	73.2143
698	Q9Y6A5	Single Protein	EKDQLTTDLNSMEKSFSDLFK	2	NH2-EKDQLTTDLNSMEK<ub>SFSDLFK-COOH	707	LK	RF	Ubiquitination of K (14)		Ubiquitination of K (2: 1.5358781255697616E-4, 14: 99.99969282437489, 21: 1.5358781255697616E-4)	Ubiquitination of K (14: 82.53968253968253)	1	3.16635	62.5
2651	Q9Y6C5	Single Protein	MIEKLFPCVILTPLDCFWEGAK	1	NH2-MIEKLFPCVILTPLDCFWEGAK<longub>-COOH	176	ER	LQ	Long ubiquitination (22)		Long ubiquitination (4: 2.978001740673974E-11, 22: 99.99999999997021)	Long ubiquitination (22: 60.63492063492064)	1	2.39223	57.7381
1383	Q9Y6R7	Single Protein	VTASSPVAVLSGHSCAQK	0	NH2-VTASSPVAVLSGHSCAQK<ub>-COOH	214	SK	HT	Ubiquitination of K (18)		Ubiquitination of K (18: 100.0)	Ubiquitination of K (18: 64.12698412698413)	1	2.57321	60.452
1835	A5LHX3	Single Protein	ELREGQLPSVASAAKLLSAMMSQYR	2	pyro-ELREGQLPSVASAAK<longub>LLSAMM<ox>SQYR-COOH	116	LR	GL	Long ubiquitination (15), Oxidation of M (21), Pyrolidone from E (1)		Long ubiquitination (15: 100.0), Oxidation of M (20: 50.0, 21: 50.0), Pyrolidone from E (0: 100.0)	Long ubiquitination (15: 50.48543689320388), Oxidation of M (21: 50.48543689320388), Pyrolidone from E (1: 50.48543689320388)	1	3.05267	70.5479
2163	A6NGB0	Related Proteins	STEQQLAAQLVTLQNELELAETK	0	NH2-STEQQLAAQLVTLQNELELAETK<ub>-COOH	170; 169	QK; QK	CA; CA	Ubiquitination of K (23)		Ubiquitination of K (23: 100.0)	Ubiquitination of K (23: 50.48543689320388)	1	3.05267	70.5479
2549	A6NK44	Single Protein	RHLPSRLPVK	2	NH2-RHLPSRLPVK<ub>-COOH	3	ML	MW	Ubiquitination of K (10)		Ubiquitination of K (10: 100.0)	Ubiquitination of K (10: 62.60869565217391)	1	4.27229	80.4348
200	A8MTI9	Single Protein	EAFLALAQLLTSKNLPDTVDGQLPMGPHSR	1	pyro-EAFLALAQLLTSK<ub>NLPDTVDGQLPM<ox>GPHSR-COOH	22	EK	AS	Oxidation of M (25), Pyrolidone from E (1), Ubiquitination of K (13)		Oxidation of M (25: 100.0), Pyrolidone from E (0: 100.0), Ubiquitination of K (13: 100.0)	Oxidation of M (25: 63.95348837209303), Pyrolidone from E (1: 63.95348837209303), Ubiquitination of K (13: 63.95348837209303)	1	4.43137	80.6897
1367	B4DYI2	Related Proteins	GFKAPGASKSSLLPR	2	NH2-GFK<ub>APGASK<ub>SSLLPR-COOH	825; 831	VR; VR	MS; MS	Ubiquitination of K (9, 3)		Ubiquitination of K (3: 100.0, 9: 100.0)	Ubiquitination of K (3: 50.4, 9: 50.4)	1	3.04518	74.8031
2675	O14795	Single Protein	QCAVLDLALDTIK	0	pyro-QCAVLDLALDTIK<ub>-COOH	1351	PK	QY	Pyrolidone from Q (1), Ubiquitination of K (13)		Pyrolidone from Q (0: 100.0), Ubiquitination of K (13: 100.0)	Pyrolidone from Q (1: 79.6116504854369), Ubiquitination of K (13: 79.6116504854369)	1	6.90618	89.916
1338	O15018	Single Protein	AKCGPKLK	2	NH2-AK<ub>CGPK<ub>LK<ub>-COOH	1879	QK	RL	Ubiquitination of K (8, 2, 6)		Ubiquitination of K (2: 100.0, 6: 100.0, 8: 100.0)	Ubiquitination of K (2: 63.95348837209303, 6: 63.95348837209303, 8: 63.95348837209303)	1	4.43137	80.6897
599	O15265	Single Protein	RFDVLLAEHK	1	NH2-RFDVLLAEHK<ub>-COOH	381	RK	NK	Ubiquitination of K (10)		Ubiquitination of K (10: 100.0)	Ubiquitination of K (10: 50.0)	1	3.0103	71.3178
551	O43399	Single Protein	SWHDVQVSSAYVK	0	NH2-SWHDVQVSSAYVK<ub>-COOH	96	SR	TS	Ubiquitination of K (13)		Ubiquitination of K (13: 100.0)	Ubiquitination of K (13: 88.04347826086956)	1	9.22395	93.5484
1295	O75151	Related Proteins	QRLGKILK	2	pyro-QRLGK<ub>ILK<ub>-COOH	1080; 923	AK; AK	IH; LN	Pyrolidone from Q (1), Ubiquitination of K (8, 5)		Pyrolidone from Q (0: 100.0), Ubiquitination of K (5: 100.0, 8: 100.0)	Pyrolidone from Q (1: 62.60869565217391), Ubiquitination of K (5: 62.60869565217391, 8: 62.60869565217391)	1	4.27229	80.4348
735	O75385	Single Protein	NPLPPILGSPTK	0	NH2-NPLPPILGSPTK<ub>-COOH	615	QR	AV	Ubiquitination of K (12)		Ubiquitination of K (12: 100.0)	Ubiquitination of K (12: 62.60869565217391)	1	4.27229	80.4348
201	O75762	Single Protein	EAGQIFQQK	0	pyro-EAGQIFQQK<ub>-COOH	788	CK	RN	Pyrolidone from E (1), Ubiquitination of K (9)		Pyrolidone from E (0: 100.0), Ubiquitination of K (9: 100.0)	Pyrolidone from E (1: 50.4), Ubiquitination of K (9: 50.4)	1	3.04518	74.8031
726	O94856	Single Protein	KDVPLGPED	1	NH2-K<ub>DVPLGPED-COOH	1252	EK	PK	Ubiquitination of K (1)		Ubiquitination of K (1: 100.0)	Ubiquitination of K (1: 80.95238095238095)	1	7.20159	90.3226
1826	O95696	Single Protein	GKPALVRR	1	NH2-GK<ub>PALVRR-COOH	876	GR	HT	Ubiquitination of K (2)		Ubiquitination of K (2: 100.0)	Ubiquitination of K (2: 50.48543689320388)	1	3.05267	70.5479
618	P00519	Single Protein	KTAPTPPK	1	NH2-K<ub>TAPTPPK<ub>-COOH	609	KK	RS	Ubiquitination of K (8, 1)		Ubiquitination of K (1: 100.0, 8: 100.0)	Ubiquitination of K (1: 92.04545454545455, 8: 92.04545454545455)	1	10.9938	95.1613
1615	P00750	Single Protein	DVPGVYTKVTNYLDWIR	1	NH2-DVPGVYTK<longub>VTNYLDWIR-COOH	541	QK	DN	Long ubiquitination (8)		Long ubiquitination (8: 100.0)	Long ubiquitination (8: 50.78125)	1	3.07869	70.7483
501	P09651	Related Proteins	IKEDTEEHHLR	1	NH2-IK<ub>EDTEEHHLR-COOH	112; 119; 112	GG; GG; GG	DY; DY; DY	Ubiquitination of K (2)		Ubiquitination of K (2: 100.0)	Ubiquitination of K (2: 100.0)	1	100	100
2005	P09661	Single Protein	KGGPSPGDVEAIK	1	NH2-K<ub>GGPSPGDVEAIK<ub>-COOH	193	KK	NA	Ubiquitination of K (1, 13)		Ubiquitination of K (1: 100.0, 13: 100.0)	Ubiquitination of K (1: 85.0574712643678, 13: 85.0574712643678)	1	8.25576	92.7419
301	P09874	Single Protein	PDSGLEHSAHVLEKGGK	1	NH2-PDSGLEHSAHVLEK<ub>GGK<ub>-COOH	535	VD	VF	Ubiquitination of K (17, 14)		Ubiquitination of K (14: 100.0, 17: 100.0)	Ubiquitination of K (14: 100.0, 17: 100.0)	1	100	100
2856	P0C671	Single Protein	ENPRCPRRPLAEK	2	NH2-ENPRC<cmm>PRRPLAEK<ub>-COOH	2	M	KA	Carbamidomethylation of C (5), Ubiquitination of K (13)		Carbamidomethylation of C (5: 100.0), Ubiquitination of K (13: 100.0)	Carbamidomethylation of C (5: 38.8235294117647), Ubiquitination of K (13: 38.8235294117647)	2	3.0664	70.6481
2742	P0CL83	Related Proteins	FKDWMVSMIVDR	1	NH2-FK<ub>DWMVSMIVDR-COOH	88; 88	GR; GR	EY; EY	Ubiquitination of K (2)		Ubiquitination of K (2: 100.0)	Ubiquitination of K (2: 76.40449438202246)	1	6.27171	88.4298
2302	P14543	Single Protein	ESVENLAK	0	pyro-ESVENLAK<ub>-COOH	244	DR	SS	Pyrolidone from E (1), Ubiquitination of K (8)		Pyrolidone from E (0: 100.0), Ubiquitination of K (8: 100.0)	Pyrolidone from E (1: 50.48543689320388), Ubiquitination of K (8: 50.48543689320388)	1	3.05267	70.5479
2156	P14923	Single Protein	NKTLVTQNSGVEALIHAILR	1	NH2-NK<ub>TLVTQNSGVEALIHAILR-COOH	425	SK	AG	Ubiquitination of K (2)		Ubiquitination of K (2: 100.0)	Ubiquitination of K (2: 55.38461538461539)	1	3.50515	76.378
2803	P22736	Single Protein	LEDLVPPPPIIDK	0	NH2-LEDLVPPPPIIDK<ub>-COOH	578	LK	IF	Ubiquitination of K (13)		Ubiquitination of K (13: 100.0)	Ubiquitination of K (13: 50.0)	1	3.0103	71.3178
1542	P28288	Single Protein	FSMGFIDSIIAK	0	NH2-FSM<ox>GFIDSIIAK<ub>-COOH	311	FR	YL	Oxidation of M (3), Ubiquitination of K (12)		Oxidation of M (3: 100.0), Ubiquitination of K (12: 100.0)	Oxidation of M (3: 88.11881188118812), Ubiquitination of K (12: 88.11881188118812)	1	9.2514	96.0317
508	P29375	Single Protein	EVKFLCPLCMRSR	2	pyro-EVK<ub>FLC<cmm>PLC<cmm>MRSR-COOH	1207	AK	RP	Carbamidomethylation of C (9, 6), Pyrolidone from E (1), Ubiquitination of K (3)		Carbamidomethylation of C (6: 100.0, 9: 100.0), Pyrolidone from E (0: 100.0), Ubiquitination of K (3: 100.0)	Carbamidomethylation of C (6: 63.95348837209303, 9: 63.95348837209303), Pyrolidone from E (1: 63.95348837209303), Ubiquitination of K (3: 63.95348837209303)	1	4.43137	80.6897
2470	P30926	Single Protein	FRQDVQEALEGVSFIAQHMK	1	NH2-FRQDVQEALEGVSFIAQHM<ox>K<longub>-COOH	420	GR	ND	Long ubiquitination (20), Oxidation of M (19)		Long ubiquitination (20: 100.0), Oxidation of M (19: 100.0)	Long ubiquitination (20: 74.11764705882354), Oxidation of M (19: 74.11764705882354)	1	5.86996	79.6748
2026	P31040	Single Protein	AAFGLSEAGFNTACVTK	0	NH2-AAFGLSEAGFNTACVTK<ub>-COOH	76	LR	LF	Ubiquitination of K (17)		Ubiquitination of K (17: 100.0)	Ubiquitination of K (17: 62.60869565217391)	1	4.27229	80.4348
1493	P35637	Single Protein	PKPDGPGGGPGGSHMGGNYGDDR	0	NH2-PK<ub>PDGPGGGPGGSHMGGNYGDDR-COOH	450	KA	RG	Ubiquitination of K (2)		Ubiquitination of K (2: 100.0)	Ubiquitination of K (2: 100.0)	1	100	100
2096	P40394	Single Protein	KISEGFELLNSGQSIRTVLTF	2	NH2-K<ub>ISEGFELLNSGQSIRTVLTF-COOH	366	FK		Ubiquitination of K (1)		Ubiquitination of K (1: 100.0)	Ubiquitination of K (1: 78.94736842105263)	1	6.76694	89.5161
411	P46019	Single Protein	VLSAHRKSLNLVDSPQPLLEK	2	NH2-VLSAHRK<ub>SLNLVDSPQPLLEK<ub>-COOH	722	TK	VP	Ubiquitination of K (21, 7)		Ubiquitination of K (7: 100.0, 21: 100.0)	Ubiquitination of K (7: 50.0, 21: 50.0)	1	3.0103	71.3178
1847	P48723	Single Protein	QRNSTIEAANLAGLKILR	2	pyro-QRNSTIEAANLAGLK<ub>ILR-COOH	182	LK	VI	Pyrolidone from Q (1), Ubiquitination of K (15)		Pyrolidone from Q (0: 100.0), Ubiquitination of K (15: 100.0)	Pyrolidone from Q (1: 74.19354838709677), Ubiquitination of K (15: 74.19354838709677)	1	5.88272	85.8333
2636	P49750	Single Protein	CEGPRPKGPR	1	NH2-C<cmm>EGPRPK<longub>GPR-COOH	775	SR	FE	Carbamidomethylation of C (1), Long ubiquitination (7)		Carbamidomethylation of C (1: 100.0), Long ubiquitination (7: 100.0)	Carbamidomethylation of C (1: 50.0), Long ubiquitination (7: 50.0)	1	3.0103	71.3178
1691	P49915	Single Protein	VCGISSKDEPDWESLIFLAR	1	NH2-VCGISSK<ub>DEPDWESLIFLAR-COOH	529	SY	LI	Ubiquitination of K (7)		Ubiquitination of K (7: 100.0)	Ubiquitination of K (7: 100.0)	1	100	100
2203	P53396	Single Protein	IIGPATVGGIKPGCFK	0	NH2-IIGPATVGGIK<ub>PGCFK<ub>-COOH	620	VT	IG	Ubiquitination of K (16, 11)		Ubiquitination of K (11: 100.0, 16: 100.0)	Ubiquitination of K (11: 62.60869565217391, 16: 62.60869565217391)	1	4.27229	80.4348
2251	P56937	Single Protein	LDCIYLNAGIMPNPQLNIKALFFGLFSRK	2	NH2-LDC<cmm>IYLNAGIMPNPQLNIK<longub>ALFFGLFSRK<longub>-COOH	84	QR	VI	Carbamidomethylation of C (3), Long ubiquitination (29, 19)		Carbamidomethylation of C (3: 100.0), Long ubiquitination (19: 100.0, 29: 100.0)	Carbamidomethylation of C (3: 48.35164835164834), Long ubiquitination (19: 48.35164835164834, 29: 48.35164835164834)	2	4.26911	80.4348
647	P57078	Single Protein	RGVDVSLQGK	1	NH2-RGVDVSLQGK<ub>-COOH	607	LR	DA	Ubiquitination of K (10)		Ubiquitination of K (10: 100.0)	Ubiquitination of K (10: 74.11764705882354)	1	5.86996	79.6748
661	P60709	Related Proteins	DLTDYLMKILTER	1	NH2-DLTDYLMK<ub>ILTER-COOH	184; 186; 184; 185; 186; 186; 185	GR; GR; GR; GR; GR; GR; GR	GY; GY; GY; GY; GY; GY; GY	Ubiquitination of K (8)		Ubiquitination of K (8: 100.0)	Ubiquitination of K (8: 100.0)	1	100	100
630	P61962	Single Protein	VWRVGETETRLECLLNNNK	2	NH2-VWRVGETETRLECLLNNNK<longub>-COOH	97	LR	NS	Long ubiquitination (19)		Long ubiquitination (19: 100.0)	Long ubiquitination (19: 50.0)	1	3.0103	71.3178
145	P62805	Single Protein	GVLKVFLENVIR	1	NH2-GVLK<ub>VFLENVIR-COOH	57	TR	DA	Ubiquitination of K (4)		Ubiquitination of K (4: 100.0)	Ubiquitination of K (4: 100.0)	1	100	100
2426	P62805	Single Protein	VLKVFLENVIR	1	NH2-VLK<ub>VFLENVIR-COOH	58	RG	DA	Ubiquitination of K (3)		Ubiquitination of K (3: 100.0)	Ubiquitination of K (3: 100.0)	1	100	100
2767	P68431	Related Proteins	ARTKQTARK	3	ace-ARTK<ub>QTARK<ub>-COOH	2; 2; 2; 2; 2	M; M; M; M; M	ST; ST; ST; ST; ST	Acetylation of protein N-term (1), Ubiquitination of K (4, 9)		Acetylation of protein N-term (0: 100.0), Ubiquitination of K (4: 100.0, 9: 100.0)	Acetylation of protein N-term (1: 63.95348837209303), Ubiquitination of K (4: 63.95348837209303, 9: 63.95348837209303)	1	4.43137	80.6897
1014	P78527	Single Protein	SIAMHDIIAAEK	0	NH2-SIAMHDIIAAEK<longub>-COOH	1300	LE	CF	Long ubiquitination (12)		Long ubiquitination (12: 100.0)	Long ubiquitination (12: 93.81443298969072)	1	12.0862	95.7627
1190	P78527	Single Protein	MIDSARKQNNFSLAMK	2	NH2-M<ox>IDSARK<longub>QNNFSLAM<ox>K<longub>-COOH	3242	MK	LL	Long ubiquitination (16, 7), Oxidation of M (1, 15)		Long ubiquitination (7: 100.0, 16: 100.0), Oxidation of M (1: 100.0, 15: 100.0)	Long ubiquitination (7: 50.78125, 16: 50.78125), Oxidation of M (1: 50.78125, 15: 50.78125)	1	3.07869	70.7483
258	Q04637	Single Protein	SSGGSGAKPSDAASEAARPATSTLNR	0	NH2-SSGGSGAK<ub>PSDAASEAARPATSTLNR-COOH	1097	KG	FS	Ubiquitination of K (8)		Ubiquitination of K (8: 100.0)	Ubiquitination of K (8: 100.0)	1	100	100
577	Q04637	Single Protein	DDGGWNTVPISK	0	NH2-DDGGWNTVPISK<ub>-COOH	1048	LV	GS	Ubiquitination of K (12)		Ubiquitination of K (12: 100.0)	Ubiquitination of K (12: 90.32258064516128)	1	10.1424	95.935
2610	Q13072	Single Protein	MAARAVFLALSAQLLQARLMK	2	NH2-M<ox>AARAVFLALSAQLLQARLM<ox>K<ub>-COOH	1		EE	Oxidation of M (20, 1), Ubiquitination of K (21)		Oxidation of M (1: 100.0, 20: 100.0), Ubiquitination of K (21: 100.0)	Oxidation of M (1: 50.78125, 20: 50.78125), Ubiquitination of K (21: 50.78125)	1	3.07869	70.7483
1814	Q14410	Single Protein	LRWMLDNVRNVQK	2	NH2-LRWMLDNVRNVQK<ub>-COOH	154	VK	AV	Ubiquitination of K (13)		Ubiquitination of K (13: 100.0)	Ubiquitination of K (13: 84.0909090909091)	1	7.98355	91.6667
406	Q15054	Single Protein	EEKIVEQPTVSVTEPK	1	NH2-EEK<ub>IVEQPTVSVTEPK<ub>-COOH	259	VK	LA	Ubiquitination of K (16, 3)		Ubiquitination of K (3: 100.0, 16: 100.0)	Ubiquitination of K (3: 63.95348837209303, 16: 63.95348837209303)	1	4.43137	80.6897
1876	Q1L6U9	Single Protein	SDPRLPCKGGGPD	2	NH2-SDPRLPC<cmm>K<ub>GGGPD-COOH	108	QK	PE	Carbamidomethylation of C (7), Ubiquitination of K (8)		Carbamidomethylation of C (7: 100.0), Ubiquitination of K (8: 100.0)	Carbamidomethylation of C (7: 63.95348837209303), Ubiquitination of K (8: 63.95348837209303)	1	4.43137	80.6897
27	Q1ZZU3	Single Protein	GAFRSPRPLPK	1	NH2-GAFRSPRPLPK<longub>-COOH	137	CR	SG	Long ubiquitination (11)		Long ubiquitination (11: 100.0)	Long ubiquitination (11: 50.0)	1	3.0103	71.3178
615	Q309B1	Single Protein	TQVSAIVQRK	1	NH2-TQVSAIVQRK<ub>-COOH	129	IR	YW	Ubiquitination of K (10)		Ubiquitination of K (10: 100.0)	Ubiquitination of K (10: 50.78125)	1	3.07869	70.7483
1879	Q4G0P3	Single Protein	LKGYDSYNTLLLPPR	1	NH2-LK<ub>GYDSYNTLLLPPR-COOH	1878	RK	NP	Ubiquitination of K (2)		Ubiquitination of K (2: 100.0)	Ubiquitination of K (2: 50.0)	1	3.0103	71.3178
2628	Q4G0Z9	Single Protein	DKLEQLQTVLESR	1	NH2-DK<ub>LEQLQTVLESR-COOH	419	KK	SI	Ubiquitination of K (2)		Ubiquitination of K (2: 100.0)	Ubiquitination of K (2: 96.55172413793103)	1	14.624	99.2424
427	Q53GL0	Single Protein	MKKNNSAK	2	ace-M<ox>K<ub>K<ub>NNSAK<ub>-COOH	2	M	RG	Acetylation of protein N-term (1), Oxidation of M (1), Ubiquitination of K (8, 2, 3)		Acetylation of protein N-term (0: 100.0), Oxidation of M (1: 100.0), Ubiquitination of K (2: 100.0, 3: 100.0, 8: 100.0)	Acetylation of protein N-term (1: 88.04347826086956), Oxidation of M (1: 88.04347826086956), Ubiquitination of K (2: 88.04347826086956, 3: 88.04347826086956, 8: 88.04347826086956)	1	9.22395	93.5484
2436	Q5T0N1	Single Protein	EQLKHAVVK	1	NH2-EQLK<ub>HAVVK<ub>-COOH	571	FK	IV	Ubiquitination of K (4, 9)		Ubiquitination of K (4: 100.0, 9: 100.0)	Ubiquitination of K (4: 62.60869565217391, 9: 62.60869565217391)	1	4.27229	80.4348
1866	Q5T8P6	Single Protein	ELLDTELDLYK	0	pyro-ELLDTELDLYK<ub>-COOH	813	QK	KM	Pyrolidone from E (1), Ubiquitination of K (11)		Pyrolidone from E (0: 100.0), Ubiquitination of K (11: 100.0)	Pyrolidone from E (1: 76.53061224489795), Ubiquitination of K (11: 76.53061224489795)	1	6.29498	88.887
1976	Q5THK1	Single Protein	NKMVAGLLNSGISNK	1	NH2-NK<ub>MVAGLLNSGISNK<ub>-COOH	874	IR	TI	Ubiquitination of K (2, 15)		Ubiquitination of K (2: 100.0, 15: 100.0)	Ubiquitination of K (2: 50.78125, 15: 50.78125)	1	3.07869	70.7483
203	Q63HR2	Single Protein	VATPPPSAQPWKGD	1	NH2-VATPPPSAQPWK<longub>GD-COOH	1180	LK	PV	Long ubiquitination (12)		Long ubiquitination (12: 100.0)	Long ubiquitination (12: 73.80952380952381)	1	5.81857	80.1527
462	Q659A1	Single Protein	KPIKRVYK	2	NH2-K<ub>PIK<ub>RVYK<ub>-COOH	633	LK	KF	Ubiquitination of K (4, 8, 1)		Ubiquitination of K (1: 100.0, 4: 100.0, 8: 100.0)	Ubiquitination of K (1: 92.70833333333334, 4: 92.70833333333334, 8: 92.70833333333334)	1	12.0862	95.7627
1540	Q68EN5	Single Protein	HRQTIDFPLLTSLGK	1	NH2-HRQTIDFPLLTSLGK<ub>-COOH	403	LR	VS	Ubiquitination of K (15)		Ubiquitination of K (15: 100.0)	Ubiquitination of K (15: 50.78125)	1	3.07869	70.7483
420	Q6N069	Single Protein	KAKLEEER	2	NH2-K<ub>AK<ub>LEEER-COOH	605	QK	KH	Ubiquitination of K (1, 3)		Ubiquitination of K (1: 100.0, 3: 100.0)	Ubiquitination of K (1: 62.60869565217391, 3: 62.60869565217391)	1	4.27229	80.4348
4	Q6NT76	Single Protein	RTGMTKHEILHALETLDR	2	NH2-RTGMTK<ub>HEILHALETLDR-COOH	35	LR	LD	Ubiquitination of K (6)		Ubiquitination of K (6: 100.0)	Ubiquitination of K (6: 88.88888888888889)	1	9.54243	94.697
1320	Q6P2I3	Related Proteins	GDEVQCEIEELGVIINK	0	NH2-GDEVQCEIEELGVIINK<ub>-COOH	296; 296	KK; KK	VV; VV	Ubiquitination of K (17)		Ubiquitination of K (17: 100.0)	Ubiquitination of K (17: 50.78125)	1	3.07869	70.7483
227	Q6UXX5	Single Protein	HGLGVSTAQPALVPK	0	NH2-HGLGVSTAQPALVPK<ub>-COOH	641	SR	VI	Ubiquitination of K (15)		Ubiquitination of K (15: 100.0)	Ubiquitination of K (15: 55.38461538461539)	1	3.50515	76.378
13	Q6Y7W6	Single Protein	LADYRYGREEMLALFLK	2	NH2-LADYRYGREEMLALFLK<ub>-COOH	38	YK	DN	Ubiquitination of K (17)		Ubiquitination of K (17: 100.0)	Ubiquitination of K (17: 74.19354838709677)	1	5.88272	85.8333
2176	Q6ZMW3	Single Protein	GIFGKTGDLQTILCLACAK	1	NH2-GIFGK<ub>TGDLQTILCLACAK<ub>-COOH	189	KR	ED	Ubiquitination of K (5, 19)		Ubiquitination of K (5: 100.0, 19: 100.0)	Ubiquitination of K (5: 50.78125, 19: 50.78125)	1	3.07869	70.7483
1331	Q709C8	Single Protein	CRFQHPSTMHILQPMDIHVELAK	1	NH2-CRFQHPSTMHILQPM<ox>DIHVELAK<ub>-COOH	770	KK	AM	Oxidation of M (15), Ubiquitination of K (23)		Oxidation of M (9: 0.09569079561351211, 15: 99.9043092043865), Ubiquitination of K (23: 100.0)	Oxidation of M (15: 74.19354838709677), Ubiquitination of K (23: 74.19354838709677)	1	5.88272	85.8333
2033	Q7KZF4	Single Protein	READGSETPEPFAAEAKFFTESR	2	NH2-READGSETPEPFAAEAK<ub>FFTESR-COOH	233	FR	LL	Ubiquitination of K (17)		Ubiquitination of K (17: 100.0)	Ubiquitination of K (17: 50.0)	1	3.0103	71.3178
376	Q7Z333	Single Protein	FRQCPEPTSTAEK	1	NH2-FRQC<cmm>PEPTSTAEK<ub>-COOH	1274	KK	LG	Carbamidomethylation of C (4), Ubiquitination of K (13)		Carbamidomethylation of C (4: 100.0), Ubiquitination of K (13: 100.0)	Carbamidomethylation of C (4: 88.88888888888889), Ubiquitination of K (13: 88.88888888888889)	1	9.54243	94.697
53	Q7Z388	Single Protein	AEEEGPPVELRQRK	2	NH2-AEEEGPPVELRQRK<ub>-COOH	2	M	KP	Ubiquitination of K (14)		Ubiquitination of K (14: 100.0)	Ubiquitination of K (14: 79.3103448275862)	1	6.84247	89.2562
1071	Q86TI2	Single Protein	RLTFCHQGLSNVLDDPK	1	NH2-RLTFC<cmm>HQGLSNVLDDPK<ub>-COOH	221	ER	SA	Carbamidomethylation of C (5), Ubiquitination of K (17)		Carbamidomethylation of C (5: 100.0), Ubiquitination of K (17: 100.0)	Carbamidomethylation of C (5: 88.17204301075269), Ubiquitination of K (17: 88.17204301075269)	1	9.2709	94.6154
22	Q86VQ0	Single Protein	EKASLLEREEKPEWETGR	2	pyro-EK<longub>ASLLEREEK<longub>PEWETGR-COOH	423	QK	YQ	Long ubiquitination (2, 11), Pyrolidone from E (1)		Long ubiquitination (2: 100.0, 11: 100.0), Pyrolidone from E (0: 100.0)	Long ubiquitination (2: 50.78125, 11: 50.78125), Pyrolidone from E (1: 50.78125)	2	5.44782	79.6597
569	Q86XE0	Single Protein	NRKELLGGFLR	2	NH2-NRK<ub>ELLGGFLR-COOH	173	GK	NI	Ubiquitination of K (3)		Ubiquitination of K (3: 100.0)	Ubiquitination of K (3: 74.11764705882354)	1	5.86996	79.6748
2297	Q8IVE0	Single Protein	SNLAHSLQVAQQQAKELR	1	NH2-SNLAHSLQVAQQQAK<ub>ELR-COOH	69	EK	QE	Ubiquitination of K (15)		Ubiquitination of K (15: 100.0)	Ubiquitination of K (15: 88.88888888888889)	1	9.54243	94.697
2333	Q8IVF6	Single Protein	ERLEAEVESLHSSLATAINEYNEIVERK	2	NH2-ERLEAEVESLHSSLATAINEYNEIVERK<ub>-COOH	413	NK	DL	Ubiquitination of K (28)		Ubiquitination of K (28: 100.0)	Ubiquitination of K (28: 80.95238095238095)	1	7.20159	90.3226
1131	Q8IYB1	Single Protein	VADWFYDSISIVLSEIQKKPQR	1	NH2-VADWFYDSISIVLSEIQK<ub>K<ub>PQR-COOH	184	TK	GM	Ubiquitination of K (18, 19)		Ubiquitination of K (18: 100.0, 19: 100.0)	Ubiquitination of K (18: 55.38461538461539, 19: 55.38461538461539)	1	3.50515	76.378
2214	Q8IYD2	Single Protein	IMVIGGVGTNQLPLKVVEMYNIDEGK	1	NH2-IMVIGGVGTNQLPLK<ub>VVEM<ox>YNIDEGK<ub>-COOH	81	KR	WK	Oxidation of M (19), Ubiquitination of K (26, 15)		Oxidation of M (2: 50.0, 19: 50.0), Ubiquitination of K (15: 100.0, 26: 100.0)	Oxidation of M (19: 74.11764705882354), Ubiquitination of K (15: 74.11764705882354, 26: 74.11764705882354)	1	5.86996	79.6748
2614	Q8N841	Single Protein	MFPKDFRFFPR	2	NH2-MFPK<ub>DFRFFPR-COOH	139	LK	TW	Ubiquitination of K (4)		Ubiquitination of K (4: 100.0)	Ubiquitination of K (4: 62.60869565217391)	1	4.27229	80.4348
2578	Q8NA23	Single Protein	QHIQTYCEVSVDGHK	0	NH2-QHIQTYCEVSVDGHK<longub>-COOH	230	AK	CI	Long ubiquitination (15)		Long ubiquitination (15: 100.0)	Long ubiquitination (15: 74.11764705882354)	1	5.86996	79.6748
140	Q8NBE8	Single Protein	IRSLIYNALNPMHK	1	NH2-IRSLIYNALNPMHK<ub>-COOH	252	NK	EI	Ubiquitination of K (14)		Ubiquitination of K (14: 100.0)	Ubiquitination of K (14: 83.33333333333334)	1	7.78151	92.1875
2774	Q8ND23	Single Protein	AKPSVELTRELQDSIR	1	NH2-AK<ub>PSVELTRELQDSIR-COOH	2	M	RC	Ubiquitination of K (2)		Ubiquitination of K (2: 100.0)	Ubiquitination of K (2: 46.391752577319586)	2	5.41537	79.6597
1158	Q8TBC3	Single Protein	MLDEKTPPSPSGQPEEPGMVR	1	NH2-M<ox>LDEK<longub>TPPSPSGQPEEPGMVR-COOH	177	GR	LV	Long ubiquitination (5), Oxidation of M (1)		Long ubiquitination (5: 100.0), Oxidation of M (1: 100.0, 19: 6.813984148407846E-17)	Long ubiquitination (5: 50.0), Oxidation of M (1: 50.0)	1	3.0103	71.3178
303	Q8TBC5	Single Protein	LHELCRQWLMPEARSK	2	NH2-LHELC<cmm>RQWLMPEARSK<ub>-COOH	70	AR	EQ	Carbamidomethylation of C (5), Ubiquitination of K (16)		Carbamidomethylation of C (5: 100.0), Ubiquitination of K (16: 100.0)	Carbamidomethylation of C (5: 50.0), Ubiquitination of K (16: 50.0)	1	3.0103	71.3178
1042	Q8TE99	Single Protein	YPLYVIPKTK	1	NH2-YPLYVIPK<longub>TK<longub>-COOH	101	DR	RP	Long ubiquitination (8, 10)		Long ubiquitination (8: 100.0, 10: 100.0)	Long ubiquitination (8: 74.19354838709677, 10: 74.19354838709677)	1	5.88272	85.8333
1908	Q8WXI7	Single Protein	LKPSGLPGSSSPTR	0	ace-LK<ub>PSGLPGSSSPTR-COOH	2	M	SL	Acetylation of protein N-term (1), Ubiquitination of K (2)		Acetylation of protein N-term (0: 100.0), Ubiquitination of K (2: 100.0)	Acetylation of protein N-term (1: 77.27272727272727), Ubiquitination of K (2: 77.27272727272727)	1	6.43453	89.726
1967	Q92504	Single Protein	RGGSTVPK	1	NH2-RGGSTVPK<ub>-COOH	290	KR	DG	Ubiquitination of K (8)		Ubiquitination of K (8: 100.0)	Ubiquitination of K (8: 63.95348837209303)	1	4.43137	80.6897
942	Q92841	Single Protein	KLMQLVDHR	1	NH2-K<longub>LM<ox>QLVDHR-COOH	547	NP	GG	Long ubiquitination (1), Oxidation of M (3)		Long ubiquitination (1: 100.0), Oxidation of M (3: 100.0)	Long ubiquitination (1: 77.38095238095238), Oxidation of M (3: 77.38095238095238)	1	6.45526	90.2439
2075	Q92878	Single Protein	QKQIDEIR	1	NH2-QK<ub>QIDEIR-COOH	426	LK	DK	Ubiquitination of K (2)		Ubiquitination of K (2: 100.0)	Ubiquitination of K (2: 76.66666666666666)	1	6.32023	88.9764
2259	Q96A58	Single Protein	QAINKMLTK	1	pyro-QAINK<longub>MLTK<longub>-COOH	188	VK	IS	Long ubiquitination (9, 5), Pyrolidone from Q (1)		Long ubiquitination (5: 100.0, 9: 100.0), Pyrolidone from Q (0: 100.0)	Long ubiquitination (5: 50.78125, 9: 50.78125), Pyrolidone from Q (1: 50.78125)	1	3.07869	70.7483
1138	Q96AG3	Single Protein	EGIGRVIGMGVPHSK	1	NH2-EGIGRVIGM<ox>GVPHSK<longub>-COOH	242	VK	RL	Long ubiquitination (15), Oxidation of M (9)		Long ubiquitination (15: 100.0), Oxidation of M (9: 100.0)	Long ubiquitination (15: 77.57009345794393), Oxidation of M (9: 77.57009345794393)	1	6.49173	89.4309
1760	Q96LP6	Single Protein	MSTVICMKQR	1	ace-MSTVIC<cmm>MK<ub>QR-COOH	1		EE	Acetylation of protein N-term (1), Carbamidomethylation of C (6), Ubiquitination of K (8)		Acetylation of protein N-term (0: 100.0), Carbamidomethylation of C (6: 100.0), Ubiquitination of K (8: 100.0)	Acetylation of protein N-term (1: 62.60869565217391), Carbamidomethylation of C (6: 62.60869565217391), Ubiquitination of K (8: 62.60869565217391)	1	4.27229	80.4348
1713	Q96M02	Single Protein	IYDNLPEVK	0	NH2-IYDNLPEVK<ub>-COOH	655	KR	KK	Ubiquitination of K (9)		Ubiquitination of K (9: 100.0)	Ubiquitination of K (9: 62.60869565217391)	1	4.27229	80.4348
1009	Q96M93	Single Protein	TGLGQNKKESR	2	NH2-TGLGQNK<ub>K<ub>ESR-COOH	141	YK	SN	Ubiquitination of K (8, 7)		Ubiquitination of K (7: 100.0, 8: 100.0)	Ubiquitination of K (7: 62.60869565217391, 8: 62.60869565217391)	1	4.27229	80.4348
1868	Q96RD7	Single Protein	MAIAQLATEYVFSDFLLK	0	NH2-MAIAQLATEYVFSDFLLK<ub>-COOH	1		EP	Ubiquitination of K (18)		Ubiquitination of K (18: 100.0)	Ubiquitination of K (18: 74.11764705882354)	1	5.86996	79.6748
724	Q96SB4	Single Protein	DEDHIALIIELLGKVPR	1	NH2-DEDHIALIIELLGK<ub>VPR-COOH	562	TR	KL	Ubiquitination of K (14)		Ubiquitination of K (14: 100.0)	Ubiquitination of K (14: 50.4)	1	3.04518	74.8031
2556	Q99963	Single Protein	DSLDINVKQTFIDPLQLLQDK	1	NH2-DSLDINVK<ub>QTFIDPLQLLQDK<ub>-COOH	129	VK	DL	Ubiquitination of K (8, 21)		Ubiquitination of K (8: 100.0, 21: 100.0)	Ubiquitination of K (8: 50.48543689320388, 21: 50.48543689320388)	1	3.05267	70.5479
536	Q9BPX3	Single Protein	HEVPEPESEMK	0	NH2-HEVPEPESEMK<ub>-COOH	977	SD	MR	Ubiquitination of K (11)		Ubiquitination of K (11: 100.0)	Ubiquitination of K (11: 50.0)	1	3.0103	71.3178
1560	Q9BVA6	Single Protein	LEARAALNQALEMK	1	NH2-LEARAALNQALEM<ox>K<ub>-COOH	104	GK	RQ	Oxidation of M (13), Ubiquitination of K (14)		Oxidation of M (13: 100.0), Ubiquitination of K (14: 100.0)	Oxidation of M (13: 50.78125), Ubiquitination of K (14: 50.78125)	1	3.07869	70.7483
1339	Q9BVW5	Single Protein	MLIRHMEHWAHRLFPK	2	NH2-M<ox>LIRHMEHWAHRLFPK<ub>-COOH	102	LK	LQ	Oxidation of M (1), Ubiquitination of K (16)		Oxidation of M (1: 99.90044007580954, 6: 0.0995599241904566), Ubiquitination of K (16: 100.0)	Oxidation of M (1: 88.07339449541286), Ubiquitination of K (16: 88.07339449541286)	1	9.23483	94.4
2089	Q9BW04	Single Protein	AKETVSTRYTQPQPPPAGLPQNAR	2	NH2-AK<longub>ETVSTRYTQPQPPPAGLPQNAR-COOH	251	QK	AE	Long ubiquitination (2)		Long ubiquitination (2: 100.0)	Long ubiquitination (2: 38.738738738738746)	2	4.15981	80.4348
552	Q9BZ29	Single Protein	DESLALPAVNPLVTPQK	0	NH2-DESLALPAVNPLVTPQK<ub>-COOH	1198	VK	GS	Ubiquitination of K (17)		Ubiquitination of K (17: 100.0)	Ubiquitination of K (17: 79.3103448275862)	1	6.84247	89.2562
154	Q9BZD4	Single Protein	YEIYGDSVDCLPSCQLEVQLYQK	0	NH2-YEIYGDSVDC<cmm>LPSCQLEVQLYQK<ub>-COOH	276	EK	KI	Carbamidomethylation of C (10), Ubiquitination of K (23)		Carbamidomethylation of C (10: 99.8518841128866, 14: 0.1481158871134159), Ubiquitination of K (23: 100.0)	Carbamidomethylation of C (14: 74.11764705882354), Ubiquitination of K (23: 74.11764705882354)	1	5.86996	79.6748
935	Q9H4I3	Single Protein	CVPSVVVGVVGMGHVPGIEK	0	NH2-C<cmm>VPSVVVGVVGM<ox>GHVPGIEK<ub>-COOH	287	RK	NW	Carbamidomethylation of C (1), Oxidation of M (12), Ubiquitination of K (20)		Carbamidomethylation of C (1: 100.0), Oxidation of M (12: 100.0), Ubiquitination of K (20: 100.0)	Carbamidomethylation of C (1: 50.4), Oxidation of M (12: 50.4), Ubiquitination of K (20: 50.4)	1	3.04518	74.8031
1299	Q9H8V3	Single Protein	KSVSMLSLNTPNSNR	1	NH2-K<ub>SVSMLSLNTPNSNR-COOH	364	LK	KR	Ubiquitination of K (1)		Ubiquitination of K (1: 100.0)	Ubiquitination of K (1: 55.38461538461539)	1	3.50515	76.378
948	Q9HCK0	Single Protein	LFMCLLCGK	0	NH2-LFMCLLC<cmm>GK<longub>-COOH	297	HK	TF	Carbamidomethylation of C (7), Long ubiquitination (9)		Carbamidomethylation of C (4: 0.036385572508882455, 7: 99.96361442749111), Long ubiquitination (9: 100.0)	Carbamidomethylation of C (7: 55.38461538461539), Long ubiquitination (9: 55.38461538461539)	1	3.50515	76.378
442	Q9NU22	Single Protein	LFACMNPATDVGKRNLPPGIR	2	NH2-LFAC<cmm>MNPATDVGK<longub>RNLPPGIR-COOH	879	FR	NR	Carbamidomethylation of C (4), Long ubiquitination (13)		Carbamidomethylation of C (4: 100.0), Long ubiquitination (13: 100.0)	Carbamidomethylation of C (4: 76.54320987654322), Long ubiquitination (13: 76.54320987654322)	1	6.29731	89.3443
1559	Q9NUA8	Single Protein	ELPNYSRQLLQQLYTLCK	1	ace-ELPNYSRQLLQQLYTLC<cmm>K<longub>-COOH	2	M	EQ	Acetylation of protein N-term (1), Carbamidomethylation of C (17), Long ubiquitination (18)		Acetylation of protein N-term (0: 100.0), Carbamidomethylation of C (17: 100.0), Long ubiquitination (18: 100.0)	Acetylation of protein N-term (1: 63.95348837209303), Carbamidomethylation of C (17: 63.95348837209303), Long ubiquitination (18: 63.95348837209303)	1	4.43137	80.6897
1028	Q9NXL9	Single Protein	FDLILVLLDTK	0	NH2-FDLILVLLDTK<ub>-COOH	483	SR	NE	Ubiquitination of K (11)		Ubiquitination of K (11: 100.0)	Ubiquitination of K (11: 74.11764705882354)	1	5.86996	79.6748
2339	Q9NZ20	Single Protein	ATSPTPSSRSPAPPKPR	1	NH2-ATSPTPSSRSPAPPK<ub>PR-COOH	287	SR	QK	Ubiquitination of K (15)		Ubiquitination of K (15: 100.0)	Ubiquitination of K (15: 50.0)	1	3.0103	71.3178
2650	Q9NZD2	Single Protein	TLQNILEVEKEMYGAEWPK	1	NH2-TLQNILEVEK<longub>EM<ox>YGAEWPK<longub>-COOH	69	FR	VG	Long ubiquitination (10, 19), Oxidation of M (12)		Long ubiquitination (10: 100.0, 19: 100.0), Oxidation of M (12: 100.0)	Long ubiquitination (10: 62.60869565217391, 19: 62.60869565217391), Oxidation of M (12: 62.60869565217391)	1	4.27229	80.4348
2611	Q9NZI8	Single Protein	VPASAAGRVIGK	1	NH2-VPASAAGRVIGK<ub>-COOH	494	IR	GG	Ubiquitination of K (12)		Ubiquitination of K (12: 100.0)	Ubiquitination of K (12: 92.04545454545455)	1	10.9938	95.1613
1492	Q9P266	Single Protein	MKEVSSVSR	1	NH2-MK<longub>EVSSVSR-COOH	1262	MR	MR	Long ubiquitination (2)		Long ubiquitination (2: 100.0)	Long ubiquitination (2: 80.16528925619835)	1	7.02574	90.9091
1553	Q9P2T0	Single Protein	ELAAPKIR	1	NH2-ELAAPK<ub>IR-COOH	234	LK	DN	Ubiquitination of K (6)		Ubiquitination of K (6: 100.0)	Ubiquitination of K (6: 50.0)	1	3.0103	71.3178
2168	Q9UHF7	Single Protein	EIPLPSLSK	0	NH2-EIPLPSLSK<ub>-COOH	995	QR	YE	Ubiquitination of K (9)		Ubiquitination of K (9: 100.0)	Ubiquitination of K (9: 62.60869565217391)	1	4.27229	80.4348
612	Q9UKM7	Single Protein	ADTDPENLPEISSQK	0	NH2-ADTDPENLPEISSQK<ub>-COOH	142	QK	TQ	Ubiquitination of K (15)		Ubiquitination of K (15: 100.0)	Ubiquitination of K (15: 100.0)	1	100	100
499	Q9UKT5	Single Protein	YSVIPQIQK	0	NH2-YSVIPQIQK<longub>-COOH	273	SR	VC	Long ubiquitination (9)		Long ubiquitination (9: 100.0)	Long ubiquitination (9: 90.32258064516128)	1	10.1424	95.935
2265	Q9ULH7	Single Protein	EQLVDQGIMPPLK	0	NH2-EQLVDQGIM<ox>PPLK<longub>-COOH	53	TR	SP	Long ubiquitination (13), Oxidation of M (9)		Long ubiquitination (13: 100.0), Oxidation of M (9: 100.0)	Long ubiquitination (13: 50.0), Oxidation of M (9: 50.0)	1	3.0103	71.3178
2236	Q9UQL6	Single Protein	VATSMRTVGKLPR	2	NH2-VATSMRTVGK<ub>LPR-COOH	477	ER	HR	Ubiquitination of K (10)		Ubiquitination of K (10: 100.0)	Ubiquitination of K (10: 74.11764705882354)	1	5.86996	79.6748

## Sheet: DB1h Ub-proteins
Sample	Protein(s)	Protein Inference	Sequence	Missed Cleavages	Modified Sequence	Position	AAs Before	AAs After	Variable Modifications	Fixed Modifications	Probabilistic PTM score	D-score	#PSMs	Score	Confidence [%]
AKT_02	P0CG47	Related and Unrelated Proteins	LIFAGKQLEDGR	1	NH2-LIFAGK<ubq long k>QLEDGR-COOH	43, 119, 195; 43, 119, 195, 271, 347, 423, 499, 575, 651; 43; 43	QR, QR, QR; QR, QR, QR, QR, QR, QR, QR, QR, QR; QR; QR	TL, TL, TL; TL, TL, TL, TL, TL, TL, TL, TL, TL; TL; TL	Ubiquitination long of K (6)		Ubiquitination long of K (6: 100.0)	Ubiquitination long of K (6: 96.90721649484536)	4	57.4875	93.8462
AKT_02	O14715	Related Proteins	KEMQELKLNSSK	2	NH2-K<ub>EM<ox>QELK<ub>LNSSK<ub>-COOH	823; 823	IK; IK	SA; SA	Oxidation of M (3), Ubiquitination of K (1, 12, 7)		Oxidation of M (3: 100.0), Ubiquitination of K (1: 100.0, 7: 100.0, 12: 100.0)	Oxidation of M (3: 99.56989247311829), Ubiquitination of K (1: 99.56989247311829, 7: 99.56989247311829, 12: 99.56989247311829)	1	26.2839	95.7746
AKT_02	P62736	Related Proteins	NEMATAASSSSLEKSYELPDGQVITIGNER	1	NH2-NEMATAASSSSLEK<ubq long k>SYELPDGQVITIGNER-COOH	227; 226; 227; 227	FE; FE; FE; FE	FR; FR; FR; FR	Ubiquitination long of K (14)		Ubiquitination long of K (14: 100.0)	Ubiquitination long of K (14: 100.0)	2	100	100
AKT_02	Q6P2I3	Related Proteins	GDEVQCEIEELGVIINK	0	NH2-GDEVQCEIEELGVIINK<ub>-COOH	296; 296	KK; KK	VV; VV	Ubiquitination of K (17)		Ubiquitination of K (17: 100.0)	Ubiquitination of K (17: 94.19953596287704)	4	17.7385	84.6154
AKT_02	P35609	Single Protein	ELPPDQAQYCIK	0	NH2-ELPPDQAQYC<cmm>IK<ub>-COOH	853	RR	RM	Carbamidomethylation of C (10), Ubiquitination of K (12)		Carbamidomethylation of C (10: 100.0), Ubiquitination of K (12: 100.0)	Carbamidomethylation of C (10: 100.0), Ubiquitination of K (12: 100.0)	1	100	100
AKT_02	P38646	Single Protein	MAGDNKLLGQFTLIGIPPAPR	1	NH2-M<ox>AGDNK<ub>LLGQFTLIGIPPAPR-COOH	493	RE	GV	Oxidation of M (1), Ubiquitination of K (6)		Oxidation of M (1: 100.0), Ubiquitination of K (6: 100.0)	Oxidation of M (1: 100.0), Ubiquitination of K (6: 100.0)	1	100	100
AKT_02	P04083	Single Protein	IMVSRSEIDMNDIK	1	NH2-IM<ox>VSRSEIDMNDIK<ub>-COOH	299	IR	AF	Oxidation of M (2), Ubiquitination of K (14)		Oxidation of M (2: 99.99999999996635, 10: 50.0), Ubiquitination of K (14: 100.0)	Oxidation of M (2: 53.69565217391305), Ubiquitination of K (14: 53.69565217391305)	9	26.7417	94.3662
AKT_02	P18206	Single Protein	TCKMLGQMTDQVADLR	1	NH2-TCK<ubq long k>M<ox>LGQMTDQVADLR-COOH	324	LG	AR	Oxidation of M (4), Ubiquitination long of K (3)		Oxidation of M (4: 99.99999999899029, 8: 5.034819679526415E-6), Ubiquitination long of K (3: 100.0)	Oxidation of M (4: 100.0), Ubiquitination long of K (3: 100.0)	2	100	100
AKT_02	Q32M92	Single Protein	VDGLMLKPTLLTPSQLK	0	NH2-VDGLM<ox>LK<ub>PTLLTPSQLK<ub>-COOH	92	SR	SP	Oxidation of M (5), Ubiquitination of K (17, 7)		Oxidation of M (5: 100.0), Ubiquitination of K (7: 100.0, 17: 100.0)	Oxidation of M (5: 92.34135667396062), Ubiquitination of K (7: 92.34135667396062, 17: 92.34135667396062)	3	28.8978	92.4242
AKT_02	Q9NZN1	Single Protein	LLYPMESK	0	NH2-LLYPM<ox>ESK<ub>-COOH	244	PK	LT	Oxidation of M (5), Ubiquitination of K (8)		Oxidation of M (5: 100.0), Ubiquitination of K (8: 100.0)	Oxidation of M (5: 93.60341151385927), Ubiquitination of K (8: 93.60341151385927)	2	18.4094	81.8182
AKT_02	Q12802	Single Protein	EALLAQREEEVQQGQQDLEKER	2	pyro-EALLAQREEEVQQGQQDLEK<ub>ER-COOH	2616	ER	EE	Pyrolidone from E (1), Ubiquitination of K (20)		Pyrolidone from E (0: 100.0), Ubiquitination of K (20: 100.0)	Pyrolidone from E (1: 94.54148471615721), Ubiquitination of K (20: 94.54148471615721)	5	63.3846	99.8687
AKT_02	Q9UFH2	Single Protein	QKNESADQLIQVVGIEAEK	1	pyro-QK<ub>NESADQLIQVVGIEAEK<ub>-COOH	3061	LK	VS	Pyrolidone from Q (1), Ubiquitination of K (2, 19)		Pyrolidone from Q (0: 100.0), Ubiquitination of K (2: 100.0, 19: 100.0)	Pyrolidone from Q (1: 84.78747203579418), Ubiquitination of K (2: 84.78747203579418, 19: 84.78747203579418)	4	22.0134	88.0597
AKT_02	P53396	Single Protein	KPAMPQDSVPSPR	0	NH2-K<ub>PAMPQDSVPSPR-COOH	471	KA	SL	Ubiquitination of K (1)		Ubiquitination of K (1: 100.0)	Ubiquitination of K (1: 99.56989247311829)	1	26.2839	95.7746
AKT_02	P52292	Single Protein	KNPAPPIDAVEQILPTLVR	1	NH2-K<ub>NPAPPIDAVEQILPTLVR-COOH	240	RN	LL	Ubiquitination of K (1)		Ubiquitination of K (1: 100.0)	Ubiquitination of K (1: 100.0)	4	100	100
AKT_02	P34931	Single Protein	KAKIHDIVLVGGSTR	2	NH2-K<ub>AK<ub>IHDIVLVGGSTR-COOH	330	MD	IP	Ubiquitination of K (1, 3)		Ubiquitination of K (1: 100.0, 3: 100.0)	Ubiquitination of K (1: 100.0, 3: 100.0)	1	100	100
AKT_02	Q5JSL3	Single Protein	PEMLIDLQYSLAKSYASTPELR	1	NH2-PEMLIDLQYSLAK<ub>SYASTPELR-COOH	1597	KD	KT	Ubiquitination of K (13)		Ubiquitination of K (13: 100.0)	Ubiquitination of K (13: 96.28180039138942)	1	20.7555	87.6923
AKT_02	Q711Q0	Single Protein	RVKSTYSSSPLLK	2	NH2-RVK<ub>STYSSSPLLK<ub>-COOH	509	RK	VL	Ubiquitination of K (13, 3)		Ubiquitination of K (3: 100.0, 13: 100.0)	Ubiquitination of K (3: 92.56900212314225, 13: 92.56900212314225)	5	26.4218	94.0299
AKT_02	Q8NBE8	Single Protein	IRSLIYNALNPMHK	1	NH2-IRSLIYNALNPMHK<ub>-COOH	252	NK	EI	Ubiquitination of K (14)		Ubiquitination of K (14: 100.0)	Ubiquitination of K (14: 96.23430962343096)	4	37.4811	95.3846
AKT_02	Q49MG5	Single Protein	RTPSTTTSSHYLGTLK	1	NH2-RTPSTTTSSHYLGTLK<ub>-COOH	389	KR	VL	Ubiquitination of K (16)		Ubiquitination of K (16: 100.0)	Ubiquitination of K (16: 96.0352422907489)	1	20.607	83.0769
AKT_02	P51884	Single Protein	LHINHNNLTESVGPLPK	0	NH2-LHINHNNLTESVGPLPK<ub>-COOH	121	KK	SL	Ubiquitination of K (17)		Ubiquitination of K (17: 100.0)	Ubiquitination of K (17: 96.28180039138942)	3	31.0281	92.3077
AKT_02	Q7Z406	Single Protein	LKGLEAEVLR	1	NH2-LK<ub>GLEAEVLR-COOH	1699	KR	LQ	Ubiquitination of K (2)		Ubiquitination of K (2: 100.0)	Ubiquitination of K (2: 100.0)	1	100	100
AKT_02	O95696	Single Protein	GKPALVRR	1	NH2-GK<ub>PALVRR-COOH	876	GR	HT	Ubiquitination of K (2)		Ubiquitination of K (2: 100.0)	Ubiquitination of K (2: 92.62672811059907)	6	34.804	96.9231
AKT_02	Q8IZD6	Single Protein	RTLSAFLCLGGLACLIVMFLPEK	1	NH2-RTLSAFLCLGGLACLIVMFLPEK<ub>-COOH	367	RK	KD	Ubiquitination of K (23)		Ubiquitination of K (23: 100.0)	Ubiquitination of K (23: 93.60341151385927)	2	16.3961	83.0769
AKT_02	P62805	Single Protein	VLKVFLENVIR	1	NH2-VLK<ub>VFLENVIR-COOH	58	RG	DA	Ubiquitination of K (3)		Ubiquitination of K (3: 100.0)	Ubiquitination of K (3: 100.0)	1	100	100
AKT_02	Q9NYK5	Single Protein	HVGKTDPGTVFVMNK	1	NH2-HVGK<ub>TDPGTVFVMNK<ub>-COOH	69	VK	NI	Ubiquitination of K (4, 15)		Ubiquitination of K (4: 100.0, 15: 100.0)	Ubiquitination of K (4: 97.9498861047836, 15: 97.9498861047836)	1	17.2016	83.0769
AKT_02	Q9C0D2	Single Protein	IQNLEKLYLASLRSMGEGHR	2	NH2-IQNLEK<ub>LYLASLRSMGEGHR-COOH	79	QK	QA	Ubiquitination of K (6)		Ubiquitination of K (6: 100.0)	Ubiquitination of K (6: 96.28180039138942)	13	79.5772	99.9342
AKT_02	O60488	Single Protein	LTLLAQQKGVEG	1	NH2-LTLLAQQK<ub>GVEG-COOH	623	KR	TW	Ubiquitination of K (8)		Ubiquitination of K (8: 100.0)	Ubiquitination of K (8: 98.39816933638444)	1	17.364	84.8485
AKT_02	A0AV96	Single Protein	LFIGGIPKMK	1	NH2-LFIGGIPK<ub>MK<ub>-COOH	153	CR	KR	Ubiquitination of K (8, 10)		Ubiquitination of K (8: 100.0, 10: 100.0)	Ubiquitination of K (8: 77.6842105263158, 10: 77.6842105263158)	5	21.2907	87.6923
AKT_02	Q8NEZ3	Single Protein	AKEADGRYK	2	NH2-AK<ub>EADGRYK<ub>-COOH	904	AK	EA	Ubiquitination of K (9, 2)		Ubiquitination of K (2: 100.0, 9: 100.0)	Ubiquitination of K (2: 96.0352422907489, 9: 96.0352422907489)	2	17.112	84.8485
2904	A0A0B4J249	Single Protein	LTVLLNKK	1	NH2-LTVLLNK<ub>K<ub>-COOH	82	QR	DK	Ubiquitination of K (8, 7)		Ubiquitination of K (7: 100.0, 8: 100.0)	Ubiquitination of K (7: 72.0, 8: 72.0)	1	5.58675	87.5
2117	A6NDB9	Single Protein	GAGSLELPAWVK	0	NH2-GAGSLELPAWVK<ub>-COOH	257	RK	ED	Ubiquitination of K (12)		Ubiquitination of K (12: 100.0)	Ubiquitination of K (12: 45.99303135888502)	1	3.49796	58.2857
1025	A6NH13	Single Protein	KMRCGESGAGPDPR	2	NH2-K<ub>M<ox>RC<cmm>GESGAGPDPR-COOH	55	GR	SN	Carbamidomethylation of C (4), Oxidation of M (2), Ubiquitination of K (1)		Carbamidomethylation of C (4: 100.0), Oxidation of M (2: 100.0), Ubiquitination of K (1: 100.0)	Carbamidomethylation of C (4: 45.751633986928105), Oxidation of M (2: 45.751633986928105), Ubiquitination of K (1: 45.751633986928105)	1	3.4559	58.0645
37	A6NLF2	Related Proteins	QRFGEALQEREK	2	NH2-QRFGEALQEREK<longub>-COOH	97; 97; 97	SR; SR; SR	AW; AW; AW	Long ubiquitination (12)		Long ubiquitination (12: 100.0)	Long ubiquitination (12: 47.452229299363054)	1	3.81259	63.2432
1635	O00410	Single Protein	TENCISAVGKIMK	1	NH2-TENCISAVGK<ub>IMK<ub>-COOH	969	NA	FK	Ubiquitination of K (13, 10)		Ubiquitination of K (10: 100.0, 13: 100.0)	Ubiquitination of K (10: 73.6842105263158, 13: 73.6842105263158)	1	5.9702	88.2353
318	O14578	Single Protein	GPSTSRSSPNK	1	NH2-GPSTSRSSPNK<ub>-COOH	1913	HR	RG	Ubiquitination of K (11)		Ubiquitination of K (11: 100.0)	Ubiquitination of K (11: 89.93055555555556)	1	9.77292	95.4023
1782	O14776	Single Protein	SAITLTSTWKEVK	1	NH2-SAITLTSTWK<ub>EVK<ub>-COOH	969	ET	KI	Ubiquitination of K (13, 10)		Ubiquitination of K (10: 100.0, 13: 100.0)	Ubiquitination of K (10: 47.452229299363054, 13: 47.452229299363054)	1	3.81259	63.2432
2454	O43184	Single Protein	DLETSLEKGMGVCLFNLPEVR	1	NH2-DLETSLEK<ub>GMGVCLFNLPEVR-COOH	399	RK	ES	Ubiquitination of K (8)		Ubiquitination of K (8: 100.0)	Ubiquitination of K (8: 88.96797153024912)	1	8.29304	93.5294
1829	O75056	Single Protein	MKPGPPHR	0	ace-MK<ub>PGPPHR-COOH	1		AG	Acetylation of protein N-term (1), Ubiquitination of K (2)		Acetylation of protein N-term (0: 100.0), Ubiquitination of K (2: 100.0)	Acetylation of protein N-term (1: 49.032258064516135), Ubiquitination of K (2: 49.032258064516135)	1	3.96654	68.0233
1274	O95243	Single Protein	YNKEALSPPR	1	NH2-YNK<ub>EALSPPR-COOH	422	SK	RK	Ubiquitination of K (3)		Ubiquitination of K (3: 100.0)	Ubiquitination of K (3: 54.0)	1	4.27716	72.8916
900	O95696	Single Protein	GKPALVRR	1	NH2-GK<ub>PALVRR-COOH	876	GR	HT	Ubiquitination of K (2)		Ubiquitination of K (2: 100.0)	Ubiquitination of K (2: 78.49829351535837)	2	10.8306	96.8086
1298	O95810	Single Protein	QNIEKKMNK	2	pyro-QNIEK<ub>K<ub>MNK<ub>-COOH	249	SR	LG	Pyrolidone from Q (1), Ubiquitination of K (9, 5, 6)		Pyrolidone from Q (0: 100.0), Ubiquitination of K (5: 100.0, 6: 100.0, 9: 100.0)	Pyrolidone from Q (1: 47.452229299363054), Ubiquitination of K (5: 47.452229299363054, 6: 47.452229299363054, 9: 47.452229299363054)	1	3.81259	63.2432
1491	O95886	Single Protein	LFAKSHSLEAPGK	1	NH2-LFAK<ub>SHSLEAPGK<ub>-COOH	180	QK	RD	Ubiquitination of K (4, 13)		Ubiquitination of K (4: 100.0, 13: 100.0)	Ubiquitination of K (4: 44.86301369863014, 13: 44.86301369863014)	1	3.51755	58.1921
287	O95997	Related Proteins	ATLIYVDK	0	NH2-ATLIYVDK<ub>-COOH	2; 2; 2	M; M; M	EN; EN; EI	Ubiquitination of K (8)		Ubiquitination of K (8: 100.0)	Ubiquitination of K (8: 72.0)	1	5.58675	87.5
599	P00973	Single Protein	GSMKTHFNTAQGFR	1	NH2-GSMK<ub>THFNTAQGFR-COOH	243	ER	TV	Ubiquitination of K (4)		Ubiquitination of K (4: 100.0)	Ubiquitination of K (4: 99.63503649635037)	1	21.0037	99.4286
2239	P0CG47	Related and Unrelated Proteins	LIFAGKQLEDGR	1	NH2-LIFAGK<ub>QLEDGR-COOH	43, 119, 195; 43, 119, 195, 271, 347, 423, 499, 575, 651; 43; 43	QR, QR, QR; QR, QR, QR, QR, QR, QR, QR, QR, QR; QR; QR	TL, TL, TL; TL, TL, TL, TL, TL, TL, TL, TL, TL; TL; TL	Ubiquitination of K (6)		Ubiquitination of K (6: 100.0)	Ubiquitination of K (6: 100.0)	1	100	100
856	P10586	Single Protein	MRYEGVVDMFQTVKTLR	2	NH2-MRYEGVVDM<ox>FQTVK<ub>TLR-COOH	1859	ER	TQ	Oxidation of M (9), Ubiquitination of K (14)		Oxidation of M (1: 1.2741618726676491E-9, 9: 99.99999999872583), Ubiquitination of K (14: 100.0)	Oxidation of M (9: 98.92086330935251), Ubiquitination of K (14: 98.92086330935251)	1	18.1291	98.8764
2000	P11532	Single Protein	HNALKDLR	1	NH2-HNALK<ub>DLR-COOH	1858	TK	SQ	Ubiquitination of K (5)		Ubiquitination of K (5: 100.0)	Ubiquitination of K (5: 47.452229299363054)	1	3.81259	63.2432
220	P11940	Related Proteins	KPLYVALAQR	0	NH2-K<longub>PLYVALAQR-COOH	361; 361; 361; 361	AT; GS; GT; AT	KE; KE; KE; KE	Long ubiquitination (1)		Long ubiquitination (1: 100.0)	Long ubiquitination (1: 100.0)	1	100	100
706	P28749	Single Protein	RVIAIDSDAESPAK	1	NH2-RVIAIDSDAESPAK<ub>-COOH	1031	KK	RV	Ubiquitination of K (14)		Ubiquitination of K (14: 100.0)	Ubiquitination of K (14: 44.86301369863014)	1	3.51755	58.1921
1851	P31937	Single Protein	TPVGFIGLGNMGNPMAKNLMK	1	NH2-TPVGFIGLGNMGNPM<ox>AK<longub>NLMK<longub>-COOH	40	SK	HG	Long ubiquitination (17, 21), Oxidation of M (15)		Long ubiquitination (17: 100.0, 21: 100.0), Oxidation of M (11: 33.33333333333333, 15: 33.33333333333333, 20: 33.33333333333333)	Long ubiquitination (17: 69.4078947368421, 21: 69.4078947368421), Oxidation of M (15: 69.4078947368421)	1	3.9794	68.0473
2266	P35221	Single Protein	CVIALQEKDVDGLD	1	NH2-CVIALQEK<ub>DVDGLD-COOH	526	NK	RT	Ubiquitination of K (8)		Ubiquitination of K (8: 100.0)	Ubiquitination of K (8: 45.751633986928105)	1	3.4559	58.0645
2006	P41252	Single Protein	QKYGADALR	1	NH2-QK<ub>YGADALR-COOH	616	II	LY	Ubiquitination of K (2)		Ubiquitination of K (2: 100.0)	Ubiquitination of K (2: 49.032258064516135)	1	3.96654	68.0233
88	P41586	Single Protein	MAGVVHVSLAALLLLPMAPAMHSDCIFK	0	ace-M<ox>AGVVHVSLAALLLLPM<ox>APAM<ox>HSDC<cmm>IFK<longub>-COOH	1		KE	Acetylation of protein N-term (1), Carbamidomethylation of C (25), Long ubiquitination (28), Oxidation of M (1, 17, 21)		Acetylation of protein N-term (0: 100.0), Carbamidomethylation of C (25: 100.0), Long ubiquitination (28: 100.0), Oxidation of M (1: 100.0, 17: 100.0, 21: 100.0)	Acetylation of protein N-term (1: 78.49829351535837), Carbamidomethylation of C (25: 78.49829351535837), Long ubiquitination (28: 78.49829351535837), Oxidation of M (1: 78.49829351535837, 17: 78.49829351535837, 21: 78.49829351535837)	1	5.59308	87.6453
2742	P42704	Single Protein	DRLDSSAVLDTGK	1	NH2-DRLDSSAVLDTGK<longub>-COOH	738	EF	YV	Long ubiquitination (13)		Long ubiquitination (13: 100.0)	Long ubiquitination (13: 51.66666666666666)	1	4.12752	69.3548
572	P49915	Single Protein	VCGISSKDEPDWESLIFLAR	1	NH2-VCGISSK<ub>DEPDWESLIFLAR-COOH	529	SY	LI	Ubiquitination of K (7)		Ubiquitination of K (7: 100.0)	Ubiquitination of K (7: 100.0)	1	100	100
267	P52948	Single Protein	FNPPTGTDTMVKAGVSTNISTK	1	NH2-FNPPTGTDTM<ox>VK<ub>AGVSTNISTK<ub>-COOH	164	IK	HQ	Oxidation of M (10), Ubiquitination of K (12, 22)		Oxidation of M (10: 100.0), Ubiquitination of K (12: 100.0, 22: 100.0)	Oxidation of M (10: 88.96797153024912), Ubiquitination of K (12: 88.96797153024912, 22: 88.96797153024912)	1	8.45098	94.0828
2556	P61254	Related Proteins	MKFNPFVTSDRSK	2	NH2-MK<ub>FNPFVTSDRSK<ub>-COOH	1; 1		NR; NR	Ubiquitination of K (13, 2)		Ubiquitination of K (2: 100.0, 13: 100.0)	Ubiquitination of K (2: 58.33333333333333, 13: 58.33333333333333)	1	4.45062	77.4194
2153	P62805	Single Protein	VLKVFLENVIR	1	NH2-VLK<ub>VFLENVIR-COOH	58	RG	DA	Ubiquitination of K (3)		Ubiquitination of K (3: 100.0)	Ubiquitination of K (3: 99.28571428571429)	1	26.9461	100
2208	P78527	Single Protein	GSKLLRMK	2	NH2-GSK<ub>LLRMK<ub>-COOH	3648	KG	LS	Ubiquitination of K (8, 3)		Ubiquitination of K (3: 100.0, 8: 100.0)	Ubiquitination of K (3: 44.86301369863014, 8: 44.86301369863014)	1	3.51755	58.1921
632	Q01433	Single Protein	CGVPFTDLLDAAK	0	NH2-C<cmm>GVPFTDLLDAAK<ub>-COOH	230	EK	SV	Carbamidomethylation of C (1), Ubiquitination of K (13)		Carbamidomethylation of C (1: 100.0), Ubiquitination of K (13: 100.0)	Carbamidomethylation of C (1: 73.6842105263158), Ubiquitination of K (13: 73.6842105263158)	1	5.9702	88.2353
1405	Q01538	Single Protein	GPESPSPKPEYSVIVEVR	0	NH2-GPESPSPK<ub>PEYSVIVEVR-COOH	330	LR	SD	Ubiquitination of K (8)		Ubiquitination of K (8: 100.0)	Ubiquitination of K (8: 62.75862068965517)	1	4.05765	68.0233
1357	Q12967	Single Protein	ELLIKEGTSK	1	pyro-ELLIK<ub>EGTSK<ub>-COOH	530	SR	FA	Pyrolidone from E (1), Ubiquitination of K (5, 10)		Pyrolidone from E (0: 100.0), Ubiquitination of K (5: 100.0, 10: 100.0)	Pyrolidone from E (1: 81.78571428571428), Ubiquitination of K (5: 81.78571428571428, 10: 81.78571428571428)	1	6.93084	91.4286
848	Q14676	Single Protein	GPGAPGLAHLQESQAGSDTDVEEGK	0	NH2-GPGAPGLAHLQESQAGSDTDVEEGK<ub>-COOH	360	TR	AP	Ubiquitination of K (25)		Ubiquitination of K (25: 100.0)	Ubiquitination of K (25: 45.99303135888502)	2	4.87662	79.8252
1032	Q14789	Single Protein	DLVEMEQK	0	NH2-DLVEMEQK<ub>-COOH	2711	AR	LL	Ubiquitination of K (8)		Ubiquitination of K (8: 100.0)	Ubiquitination of K (8: 44.86301369863014)	1	3.51755	58.1921
1024	Q15149	Single Protein	LTVNEAVKEGVVGPEL	1	NH2-LTVNEAVK<ub>EGVVGPEL-COOH	2885	RR	HH	Ubiquitination of K (8)		Ubiquitination of K (8: 100.0)	Ubiquitination of K (8: 51.66666666666666)	1	4.12752	69.3548
1073	Q2TB18	Single Protein	ARLPLGATSSK	1	NH2-ARLPLGATSSK<longub>-COOH	239	SK	GR	Long ubiquitination (11)		Long ubiquitination (11: 100.0)	Long ubiquitination (11: 44.86301369863014)	1	3.51755	58.1921
801	Q3B7J2	Related Proteins	FLPAFVRMK	1	NH2-FLPAFVRMK<ub>-COOH	126; 124	LR; LR	QL; QL	Ubiquitination of K (9)		Ubiquitination of K (9: 100.0)	Ubiquitination of K (9: 78.49829351535837)	1	6.55342	89.0909
1518	Q53SF7	Single Protein	ESCQISQNLDIMK	0	NH2-ESCQISQNLDIMK<ub>-COOH	259	NR	EK	Ubiquitination of K (13)		Ubiquitination of K (13: 100.0)	Ubiquitination of K (13: 86.31578947368422)	1	8.78557	94.3182
686	Q5T0J3	Single Protein	MIPVRGLWYCYLQVKK	2	NH2-M<ox>IPVRGLWYCYLQVK<ub>K<ub>-COOH	1		VR	Oxidation of M (1), Ubiquitination of K (16, 15)		Oxidation of M (1: 100.0), Ubiquitination of K (15: 100.0, 16: 100.0)	Oxidation of M (1: 72.0), Ubiquitination of K (15: 72.0, 16: 72.0)	1	4.60351	76.506
2369	Q5T7M9	Single Protein	QLYSCIALKVTANQMEMEHSLILNNLK	1	pyro-QLYSC<cmm>IALK<ub>VTANQMEM<ox>EHSLILNNLK<ub>-COOH	389	EK	TL	Carbamidomethylation of C (5), Oxidation of M (17), Pyrolidone from Q (1), Ubiquitination of K (9, 27)		Carbamidomethylation of C (5: 100.0), Oxidation of M (15: 50.0, 17: 50.0), Pyrolidone from Q (0: 100.0), Ubiquitination of K (9: 100.0, 27: 100.0)	Carbamidomethylation of C (5: 62.75862068965517), Oxidation of M (17: 62.75862068965517), Pyrolidone from Q (1: 62.75862068965517), Ubiquitination of K (9: 62.75862068965517, 27: 62.75862068965517)	1	4.05765	68.0233
882	Q5T8P6	Single Protein	ERDLVKPK	1	NH2-ERDLVK<ub>PK<ub>-COOH	212	SR	YD	Ubiquitination of K (8, 6)		Ubiquitination of K (6: 100.0, 8: 100.0)	Ubiquitination of K (6: 92.6829268292683, 8: 92.6829268292683)	1	10.7171	96.988
2661	Q5T8P6	Single Protein	RTIGSGEPGVPTKK	2	NH2-RTIGSGEPGVPTK<ub>K<ub>-COOH	492	RK	TW	Ubiquitination of K (13, 14)		Ubiquitination of K (13: 100.0, 14: 100.0)	Ubiquitination of K (13: 62.13235294117647, 14: 62.13235294117647)	1	4.90323	79.7688
100	Q6AI39	Single Protein	NEVLHTDIMK	0	NH2-NEVLHTDIM<ox>K<longub>-COOH	983	PK	GS	Long ubiquitination (10), Oxidation of M (9)		Long ubiquitination (10: 100.0), Oxidation of M (9: 100.0)	Long ubiquitination (10: 78.49829351535837), Oxidation of M (9: 78.49829351535837)	1	6.45892	89.5954
1016	Q6IC98	Single Protein	QRRMELEQK	2	NH2-QRRMELEQK<longub>-COOH	119	ER	VQ	Long ubiquitination (9)		Long ubiquitination (9: 100.0)	Long ubiquitination (9: 45.751633986928105)	1	3.4559	58.0645
341	Q6NXP0	Single Protein	FKEFEEFTR	1	NH2-FK<ub>EFEEFTR-COOH	479	MR	KL	Ubiquitination of K (2)		Ubiquitination of K (2: 100.0)	Ubiquitination of K (2: 47.452229299363054)	1	3.81259	63.2432
17	Q7L8A9	Single Protein	KDVSSPQR	1	NH2-K<ub>DVSSPQR-COOH	320	RK	AQ	Ubiquitination of K (1)		Ubiquitination of K (1: 100.0)	Ubiquitination of K (1: 58.33333333333333)	1	4.45062	77.4194
2508	Q7Z494	Single Protein	GVGAGGLLGASFK	0	NH2-GVGAGGLLGASFK<ub>-COOH	63	PR	ST	Ubiquitination of K (13)		Ubiquitination of K (13: 100.0)	Ubiquitination of K (13: 45.99303135888502)	1	3.49796	58.2857
2300	Q86TI2	Single Protein	RLTFCHQGLSNVLDDPK	1	NH2-RLTFC<cmm>HQGLSNVLDDPK<ub>-COOH	221	ER	SA	Carbamidomethylation of C (5), Ubiquitination of K (17)		Carbamidomethylation of C (5: 100.0), Ubiquitination of K (17: 100.0)	Carbamidomethylation of C (5: 98.23321554770318), Ubiquitination of K (17: 98.23321554770318)	1	13.9707	97.5904
639	Q86V48	Single Protein	KISSELEMLR	1	NH2-K<longub>ISSELEMLR-COOH	150	TK	VK	Long ubiquitination (1)		Long ubiquitination (1: 100.0)	Long ubiquitination (1: 76.32508833922262)	1	5.0779	80.9524
1319	Q86XA9	Single Protein	HCPLGIPHGKGKIIMTLAEDLLCSAAQNSR	2	NH2-HCPLGIPHGK<ub>GK<ub>IIM<ox>TLAEDLLCSAAQNSR-COOH	515	VK	LS	Oxidation of M (15), Ubiquitination of K (12, 10)		Oxidation of M (15: 100.0), Ubiquitination of K (10: 100.0, 12: 100.0)	Oxidation of M (15: 99.63768115942028), Ubiquitination of K (10: 99.63768115942028, 12: 99.63768115942028)	1	14.3136	98.1818
1235	Q86YT6	Single Protein	VKKCLICK	2	NH2-VK<ub>K<ub>CLICK<ub>-COOH	847	PR	EQ	Ubiquitination of K (8, 2, 3)		Ubiquitination of K (2: 100.0, 3: 100.0, 8: 100.0)	Ubiquitination of K (2: 73.6842105263158, 3: 73.6842105263158, 8: 73.6842105263158)	1	5.9702	88.2353
1336	Q8IYA2	Single Protein	ETEQMYQSKLK	1	pyro-ETEQMYQSK<ub>LK<ub>-COOH	829	KK	KY	Pyrolidone from E (1), Ubiquitination of K (9, 11)		Pyrolidone from E (0: 100.0), Ubiquitination of K (9: 100.0, 11: 100.0)	Pyrolidone from E (1: 49.032258064516135), Ubiquitination of K (9: 49.032258064516135, 11: 49.032258064516135)	1	3.96654	68.0233
563	Q8N7X0	Single Protein	WQLTKGLR	1	NH2-WQLTK<ub>GLR-COOH	1475	KK	DV	Ubiquitination of K (5)		Ubiquitination of K (5: 100.0)	Ubiquitination of K (5: 51.66666666666666)	1	4.12752	69.3548
214	Q8NAA6	Single Protein	AKGRSSICLQASVWMAGGK	2	NH2-AK<ub>GRSSIC<cmm>LQASVWM<ox>AGGK<ub>-COOH	29	SK	LR	Carbamidomethylation of C (8), Oxidation of M (15), Ubiquitination of K (2, 19)		Carbamidomethylation of C (8: 100.0), Oxidation of M (15: 100.0), Ubiquitination of K (2: 100.0, 19: 100.0)	Carbamidomethylation of C (8: 95.35714285714285), Oxidation of M (15: 95.35714285714285), Ubiquitination of K (2: 95.35714285714285, 19: 95.35714285714285)	1	13.2565	98.2353
152	Q8NBZ7	Single Protein	YPPVKFLSEK	1	NH2-YPPVK<ub>FLSEK<ub>-COOH	77	QK	DR	Ubiquitination of K (5, 10)		Ubiquitination of K (5: 100.0, 10: 100.0)	Ubiquitination of K (5: 69.4078947368421, 10: 69.4078947368421)	1	5.4801	84.3243
1106	Q8NCM8	Single Protein	QPFILVGPEGCGKGMLLRYAFSQLR	2	pyro-QPFILVGPEGC<cmm>GK<ub>GMLLRYAFSQLR-COOH	2285	TK	ST	Carbamidomethylation of C (11), Pyrolidone from Q (1), Ubiquitination of K (13)		Carbamidomethylation of C (11: 100.0), Pyrolidone from Q (0: 100.0), Ubiquitination of K (13: 100.0)	Carbamidomethylation of C (11: 62.13235294117647), Pyrolidone from Q (1: 62.13235294117647), Ubiquitination of K (13: 62.13235294117647)	1	4.77121	79.1673
2277	Q8NFY4	Single Protein	AVYSRVARICK	2	NH2-AVYSRVARICK<ub>-COOH	250	GK	ND	Ubiquitination of K (11)		Ubiquitination of K (11: 100.0)	Ubiquitination of K (11: 45.99303135888502)	1	3.49796	58.2857
2269	Q8TB92	Single Protein	VMEAGDFICKAVNK	1	NH2-VMEAGDFICK<ub>AVNK<ub>-COOH	344	YK	TT	Ubiquitination of K (10, 14)		Ubiquitination of K (10: 100.0, 14: 100.0)	Ubiquitination of K (10: 44.86301369863014, 14: 44.86301369863014)	1	3.51755	58.1921
2601	Q8TEQ6	Single Protein	REAIAIAK	1	NH2-REAIAIAK<longub>-COOH	1005	FY	AR	Long ubiquitination (8)		Long ubiquitination (8: 100.0)	Long ubiquitination (8: 45.751633986928105)	1	3.4559	58.0645
2072	Q8WTR4	Single Protein	DLGPKPALIGHR	0	NH2-DLGPK<ub>PALIGHR-COOH	223	KK	GA	Ubiquitination of K (5)		Ubiquitination of K (5: 100.0)	Ubiquitination of K (5: 30.175438596491233)	2	4.08154	68.689
1193	Q8WZ42	Single Protein	KPEAPPPKVPEAPKEVVPEK	2	NH2-K<ub>PEAPPPK<ub>VPEAPK<ub>EVVPEK<ub>-COOH	11444	AK	KV	Ubiquitination of K (8, 1, 20, 14)		Ubiquitination of K (1: 100.0, 8: 100.0, 14: 100.0, 20: 100.0)	Ubiquitination of K (1: 80.13937282229965, 8: 80.13937282229965, 14: 80.13937282229965, 20: 80.13937282229965)	1	5.44068	83.8889
648	Q92610	Single Protein	LSSCVAALVALQAK	0	NH2-LSSCVAALVALQAK<ub>-COOH	281	SK	RV	Ubiquitination of K (14)		Ubiquitination of K (14: 100.0)	Ubiquitination of K (14: 47.452229299363054)	1	3.81259	63.2432
1485	Q92736	Single Protein	FLPPPGYAPCYEAVLPKEKLK	2	NH2-FLPPPGYAPCYEAVLPK<ub>EK<ub>LK<ub>-COOH	813	FK	VE	Ubiquitination of K (17, 21, 19)		Ubiquitination of K (17: 100.0, 19: 100.0, 21: 100.0)	Ubiquitination of K (17: 62.75862068965517, 19: 62.75862068965517, 21: 62.75862068965517)	1	4.05765	68.0233
2616	Q92772	Single Protein	LSEVVIDLAKKCLHIDPDK	2	NH2-LSEVVIDLAK<ub>K<ub>CLHIDPDK<ub>-COOH	256	PK	RP	Ubiquitination of K (10, 11, 19)		Ubiquitination of K (10: 100.0, 11: 100.0, 19: 100.0)	Ubiquitination of K (10: 99.2831541218638, 11: 99.2831541218638, 19: 99.2831541218638)	1	14.7712	98.1873
1157	Q92954	Single Protein	FTNDIKDAGYPKPIFK	1	NH2-FTNDIK<ub>DAGYPK<ub>PIFK<ub>-COOH	1219	WR	GF	Ubiquitination of K (12, 16, 6)		Ubiquitination of K (6: 100.0, 12: 100.0, 16: 100.0)	Ubiquitination of K (6: 86.87943262411348, 12: 86.87943262411348, 16: 86.87943262411348)	1	8.28456	93.5294
1207	Q969Q6	Single Protein	YYSEWKGGR	1	NH2-YYSEWK<ub>GGR-COOH	38	TK	KN	Ubiquitination of K (6)		Ubiquitination of K (6: 100.0)	Ubiquitination of K (6: 51.66666666666666)	1	4.12752	69.3548
234	Q96G03	Single Protein	NSLTLEAVKR	1	NH2-NSLTLEAVK<ub>R-COOH	28	DK	LI	Ubiquitination of K (9)		Ubiquitination of K (9: 100.0)	Ubiquitination of K (9: 49.032258064516135)	1	3.96654	68.0233
2832	Q96KP4	Single Protein	DIGKQKLPDGSEIPLPPILLGR	2	NH2-DIGK<ub>QK<ub>LPDGSEIPLPPILLGR-COOH	63	LV	LG	Ubiquitination of K (4, 6)		Ubiquitination of K (4: 100.0, 6: 100.0)	Ubiquitination of K (4: 99.31506849315068, 6: 99.31506849315068)	1	14.3136	98.1818
2555	Q96L96	Single Protein	KASMLEVPR	1	NH2-K<ub>ASMLEVPR-COOH	1422	GR	AE	Ubiquitination of K (1)		Ubiquitination of K (1: 100.0)	Ubiquitination of K (1: 45.99303135888502)	1	3.49796	58.2857
395	Q96LP2	Single Protein	HMENKLSK	1	NH2-HMENK<ub>LSK<ub>-COOH	379	VK	KM	Ubiquitination of K (8, 5)		Ubiquitination of K (5: 100.0, 8: 100.0)	Ubiquitination of K (5: 44.86301369863014, 8: 44.86301369863014)	1	3.51755	58.1921
2313	Q96S53	Single Protein	IPDVSMGSEK	0	NH2-IPDVSMGSEK<longub>-COOH	204	EK	LA	Long ubiquitination (10)		Long ubiquitination (10: 100.0)	Long ubiquitination (10: 45.99303135888502)	1	3.49796	58.2857
1761	Q9BXW4	Single Protein	KSLAIRQEEVAGIR	2	NH2-K<ub>SLAIRQEEVAGIR-COOH	17	QR	AK	Ubiquitination of K (1)		Ubiquitination of K (1: 100.0)	Ubiquitination of K (1: 78.49829351535837)	1	5.1663	80.8383
130	Q9BYD6	Single Protein	NGHEIKVDEER	1	NH2-NGHEIK<ub>VDEER-COOH	239	FK	EN	Ubiquitination of K (6)		Ubiquitination of K (6: 100.0)	Ubiquitination of K (6: 47.452229299363054)	1	3.81259	63.2432
206	Q9C0D2	Single Protein	IQNLEKLYLASLRSMGEGHR	2	NH2-IQNLEK<ub>LYLASLRSMGEGHR-COOH	79	QK	QA	Ubiquitination of K (6)		Ubiquitination of K (6: 100.0)	Ubiquitination of K (6: 69.4078947368421)	1	3.9794	68.0473
2054	Q9H6S0	Single Protein	IPPANGQAAAIK	0	NH2-IPPANGQAAAIK<longub>-COOH	1017	KK	AL	Long ubiquitination (12)		Long ubiquitination (12: 100.0)	Long ubiquitination (12: 81.78571428571428)	1	5.5565	86.9048
18	Q9HB21	Single Protein	RGFYESLAK	1	NH2-RGFYESLAK<longub>-COOH	342	EK	VK	Long ubiquitination (9)		Long ubiquitination (9: 100.0)	Long ubiquitination (9: 94.20289855072464)	1	11.479	97.6048
1557	Q9NQS7	Single Protein	RNTPLRMDPK	2	NH2-RNTPLRM<ox>DPK<longub>-COOH	522	IK	CS	Long ubiquitination (10), Oxidation of M (7)		Long ubiquitination (10: 100.0), Oxidation of M (7: 100.0)	Long ubiquitination (10: 80.45602605863192), Oxidation of M (7: 80.45602605863192)	1	6.93084	91.4286
2723	Q9NST1	Single Protein	GGYMSKICNLLPIR	1	NH2-GGYM<ox>SK<ub>IC<cmm>NLLPIR-COOH	336	DK	IM	Carbamidomethylation of C (8), Oxidation of M (4), Ubiquitination of K (6)		Carbamidomethylation of C (8: 100.0), Oxidation of M (4: 100.0), Ubiquitination of K (6: 100.0)	Carbamidomethylation of C (8: 91.43835616438356), Oxidation of M (4: 91.43835616438356), Ubiquitination of K (6: 91.43835616438356)	1	9.27712	94.0828
1386	Q9NU22	Single Protein	YRLAEPTEK	1	NH2-YRLAEPTEK<ub>-COOH	1282	ER	EY	Ubiquitination of K (9)		Ubiquitination of K (9: 100.0)	Ubiquitination of K (9: 82.06896551724138)	1	7.18044	90.5325
1688	Q9NV88	Single Protein	KLYCLSGHPTLPCNVLK	1	ace-K<ub>LYCLSGHPTLPCNVLK<ub>-COOH	2	M	FK	Acetylation of protein N-term (1), Ubiquitination of K (17, 1)		Acetylation of protein N-term (0: 100.0), Ubiquitination of K (1: 100.0, 17: 100.0)	Acetylation of protein N-term (1: 83.06188925081433), Ubiquitination of K (1: 83.06188925081433, 17: 83.06188925081433)	1	6.0544	90.1163
1013	Q9NX20	Single Protein	REPKNLSDIR	2	NH2-REPK<ub>NLSDIR-COOH	64	VR	GP	Ubiquitination of K (4)		Ubiquitination of K (4: 100.0)	Ubiquitination of K (4: 45.751633986928105)	1	3.4559	58.0645
1329	Q9NXF1	Single Protein	KGEAEHLR	1	NH2-K<ub>GEAEHLR-COOH	813	IE	KR	Ubiquitination of K (1)		Ubiquitination of K (1: 100.0)	Ubiquitination of K (1: 76.47058823529412)	1	6.13478	90.2857
415	Q9UH65	Single Protein	ELEDMYLKLQEALEDER	1	pyro-ELEDM<ox>YLK<longub>LQEALEDER-COOH	421	VR	QA	Long ubiquitination (8), Oxidation of M (5), Pyrolidone from E (1)		Long ubiquitination (8: 100.0), Oxidation of M (5: 100.0), Pyrolidone from E (0: 100.0)	Long ubiquitination (8: 82.06896551724138), Oxidation of M (5: 82.06896551724138), Pyrolidone from E (1: 82.06896551724138)	1	5.74031	87.7907
1326	Q9UKM7	Single Protein	ADTDPENLPEISSQK	0	NH2-ADTDPENLPEISSQK<ub>-COOH	142	QK	TQ	Ubiquitination of K (15)		Ubiquitination of K (15: 100.0)	Ubiquitination of K (15: 99.65635738831615)	1	21.038	99.4012
197	Q9UKT4	Single Protein	VTENNNKFSPHASTR	1	NH2-VTENNNK<ub>FSPHASTR-COOH	302	QR	EY	Ubiquitination of K (7)		Ubiquitination of K (7: 100.0)	Ubiquitination of K (7: 54.0)	1	4.27716	72.8916
1081	Q9UKT5	Single Protein	YSVIPQIQK	0	NH2-YSVIPQIQK<longub>-COOH	273	SR	VC	Long ubiquitination (9)		Long ubiquitination (9: 100.0)	Long ubiquitination (9: 83.10344827586206)	2	11.7101	97.6879
1170	Q9ULP9	Single Protein	LSPFLAARHFNLPSK	1	NH2-LSPFLAARHFNLPSK<ub>-COOH	479	DR	TE	Ubiquitination of K (15)		Ubiquitination of K (15: 100.0)	Ubiquitination of K (15: 76.32508833922262)	1	6.05605	89.9408
915	Q9UPN3	Single Protein	IDIESGQRYLEVIPFSDIK	1	NH2-IDIESGQRYLEVIPFSDIK<ub>-COOH	2643	CK	DG	Ubiquitination of K (19)		Ubiquitination of K (19: 100.0)	Ubiquitination of K (19: 69.4078947368421)	1	4.49969	77.4194
550	Q9Y2F5	Single Protein	KGGEESLRAK	2	NH2-K<ub>GGEESLRAK<ub>-COOH	799	LR	SE	Ubiquitination of K (1, 10)		Ubiquitination of K (1: 100.0, 10: 100.0)	Ubiquitination of K (1: 62.75862068965517, 10: 62.75862068965517)	1	4.68672	78.453
1933	Q9Y312	Single Protein	MIPPGIHFLHYSSVDK	0	NH2-M<ox>IPPGIHFLHYSSVDK<ub>-COOH	50	VK	AN	Oxidation of M (1), Ubiquitination of K (16)		Oxidation of M (1: 100.0), Ubiquitination of K (16: 100.0)	Oxidation of M (1: 67.14801444043322), Ubiquitination of K (16: 67.14801444043322)	1	5.22591	83.6257
1755	Q9Y3S1	Single Protein	QASLPVSGSVAGDFVK	0	pyro-QASLPVSGSVAGDFVK<ub>-COOH	1860	QK	KA	Pyrolidone from Q (1), Ubiquitination of K (16)		Pyrolidone from Q (0: 100.0), Ubiquitination of K (16: 100.0)	Pyrolidone from Q (1: 89.93055555555556), Ubiquitination of K (16: 89.93055555555556)	1	9.77292	95.4023
2074	Q9Y4D7	Single Protein	LLSTKGTLQK	1	NH2-LLSTK<ub>GTLQK<ub>-COOH	1707	TR	FL	Ubiquitination of K (5, 10)		Ubiquitination of K (5: 100.0, 10: 100.0)	Ubiquitination of K (5: 72.0, 10: 72.0)	1	5.58675	87.5
12	O94880	Single Protein	LHYHLGCLDPPLTRMPRK	2	NH2-LHYHLGC<cmm>LDPPLTRM<ox>PRK<ub>-COOH	748	CK	TK	Carbamidomethylation of C (7), Oxidation of M (15), Ubiquitination of K (18)		Carbamidomethylation of C (7: 100.0), Oxidation of M (15: 100.0), Ubiquitination of K (18: 100.0)	Carbamidomethylation of C (7: 63.41814690350456), Oxidation of M (15: 63.41814690350456), Ubiquitination of K (18: 63.41814690350456)	1	100	100
15	Q96N64	Single Protein	EEKKLSNSLK	2	pyro-EEK<ub>K<ub>LSNSLK<ub>-COOH	625	SK	MK	Pyrolidone from E (1), Ubiquitination of K (4, 10, 3)		Pyrolidone from E (0: 100.0), Ubiquitination of K (3: 100.0, 4: 100.0, 10: 100.0)	Pyrolidone from E (1: 69.56106870229007), Ubiquitination of K (3: 69.56106870229007, 4: 69.56106870229007, 10: 69.56106870229007)	1	6.15424	90.3766
20	Q86VQ0	Single Protein	EKASLLEREEKPEWETGR	2	pyro-EK<longub>ASLLEREEK<longub>PEWETGR-COOH	423	QK	YQ	Long ubiquitination (2, 11), Pyrolidone from E (1)		Long ubiquitination (2: 100.0, 11: 100.0), Pyrolidone from E (0: 100.0)	Long ubiquitination (2: 61.281070745697896, 11: 61.281070745697896), Pyrolidone from E (1: 61.281070745697896)	2	5.28087	86.25
164	Q96BY7	Single Protein	RLSYRHGLLGVDK	2	NH2-RLSYRHGLLGVDK<ub>-COOH	1854	LK	LF	Ubiquitination of K (13)		Ubiquitination of K (13: 100.0)	Ubiquitination of K (13: 43.040991420400374)	1	3.76751	70.6383
172	Q2NKX8	Single Protein	KGGILADDMGLGK	1	NH2-K<ub>GGILADDMGLGK<ub>-COOH	116	GR	TV	Ubiquitination of K (1, 13)		Ubiquitination of K (1: 100.0, 13: 100.0)	Ubiquitination of K (1: 40.30710172744721, 13: 40.30710172744721)	1	4.03958	78.481
205	Q63HR2	Single Protein	VATPPPSAQPWKGD	1	NH2-VATPPPSAQPWK<longub>GD-COOH	1180	LK	PV	Long ubiquitination (12)		Long ubiquitination (12: 100.0)	Long ubiquitination (12: 88.77358490566037)	1	6.51448	91.0637
210	A6NCK2	Related Proteins	MDFKTNILLK	1	NH2-MDFK<ub>TNILLK<ub>-COOH	62; 62	PK; PK	NL; NL	Ubiquitination of K (4, 10)		Ubiquitination of K (4: 100.0, 10: 100.0)	Ubiquitination of K (4: 55.796055796055796, 10: 55.796055796055796)	1	3.84214	72.5738
211	Q8NEG4	Single Protein	VPVYIILDEAGVK	0	NH2-VPVYIILDEAGVK<ub>-COOH	190	RR	YF	Ubiquitination of K (13)		Ubiquitination of K (13: 100.0)	Ubiquitination of K (13: 63.961813842482094)	1	4.86076	82.5532
249	Q3KR37	Single Protein	SSIETKPDASPQLPK	0	NH2-SSIETK<ub>PDASPQLPK<ub>-COOH	265	SK	KS	Ubiquitination of K (6, 15)		Ubiquitination of K (6: 100.0, 15: 100.0)	Ubiquitination of K (6: 43.040991420400374, 15: 43.040991420400374)	1	3.76751	70.6383
290	P46013	Single Protein	IACKSPQPDPVDTPASTK	1	NH2-IACK<ub>SPQPDPVDTPASTK<ub>-COOH	2340	TK	QR	Ubiquitination of K (4, 18)		Ubiquitination of K (4: 100.0, 18: 100.0)	Ubiquitination of K (4: 68.36832061068702, 18: 68.36832061068702)	1	5.44068	86.25
311	Q9BV73	Single Protein	EAMRAAQAGSLEISK	1	pyro-EAM<ox>RAAQAGSLEISK<ub>-COOH	2313	KR	AT	Oxidation of M (3), Pyrolidone from E (1), Ubiquitination of K (15)		Oxidation of M (3: 100.0), Pyrolidone from E (0: 100.0), Ubiquitination of K (15: 100.0)	Oxidation of M (3: 63.961813842482094), Pyrolidone from E (1: 63.961813842482094), Ubiquitination of K (15: 63.961813842482094)	1	4.86076	82.5532
318	Q99728	Single Protein	MLSELAVILKAK	1	NH2-M<ox>LSELAVILK<ub>AK<ub>-COOH	584	QK	KY	Oxidation of M (1), Ubiquitination of K (12, 10)		Oxidation of M (1: 100.0), Ubiquitination of K (10: 100.0, 12: 100.0)	Oxidation of M (1: 43.040991420400374), Ubiquitination of K (10: 43.040991420400374, 12: 43.040991420400374)	1	3.76751	70.6383
343	P21333	Single Protein	KARAYGPGIEPTG	2	NH2-K<longub>ARAYGPGIEPTG-COOH	283	PK	NM	Long ubiquitination (1)		Long ubiquitination (1: 100.0)	Long ubiquitination (1: 65.91885441527447)	1	6.42594	90.5983
364	Q9UPR3	Single Protein	QGPPTGESSEPEAK	0	NH2-QGPPTGESSEPEAK<ub>-COOH	3	MS	VL	Ubiquitination of K (14)		Ubiquitination of K (14: 100.0)	Ubiquitination of K (14: 63.41814690350456)	1	3.86659	75.2137
368	Q8N6Y2	Single Protein	MRVVTIVILLCFCKAAELR	2	NH2-M<ox>RVVTIVILLC<cmm>FCK<ub>AAELR-COOH	1		KA	Carbamidomethylation of C (11), Oxidation of M (1), Ubiquitination of K (14)		Carbamidomethylation of C (11: 50.0, 13: 50.0), Oxidation of M (1: 100.0), Ubiquitination of K (14: 100.0)	Carbamidomethylation of C (11: 77.98471824259789), Oxidation of M (1: 77.98471824259789), Ubiquitination of K (14: 77.98471824259789)	1	4.26209	79.1489
439	Q9NRZ7	Single Protein	CLRGTVAAVYDVTLNFRGNK	2	NH2-C<cmm>LRGTVAAVYDVTLNFRGNK<ub>-COOH	217	VK	NP	Carbamidomethylation of C (1), Ubiquitination of K (20)		Carbamidomethylation of C (1: 100.0), Ubiquitination of K (20: 100.0)	Carbamidomethylation of C (1: 69.56106870229007), Ubiquitination of K (20: 69.56106870229007)	1	7.78151	91.4634
440	Q96QD9	Single Protein	FGTRLVGATATSSPPPK	1	NH2-FGTRLVGATATSSPPPK<longub>-COOH	4	NR	AR	Long ubiquitination (17)		Long ubiquitination (17: 100.0)	Long ubiquitination (17: 69.56106870229007)	1	3.70384	68.2008
474	Q13472	Single Protein	QVFIEAVAK	0	NH2-QVFIEAVAK<ub>-COOH	615	YK	AK	Ubiquitination of K (9)		Ubiquitination of K (9: 100.0)	Ubiquitination of K (9: 58.65384615384615)	1	3.70356	67.2269
479	P07437	Single Protein	PELTQQVFDAK	0	NH2-PELTQQVFDAK<longub>-COOH	287	TV	NM	Long ubiquitination (11)		Long ubiquitination (11: 100.0)	Long ubiquitination (11: 65.91885441527447)	1	6.42594	90.5983
499	Q659A1	Single Protein	KPIKRVYK	2	NH2-K<ub>PIK<ub>RVYK<ub>-COOH	633	LK	KF	Ubiquitination of K (4, 8, 1)		Ubiquitination of K (1: 100.0, 4: 100.0, 8: 100.0)	Ubiquitination of K (1: 41.145584725536985, 4: 41.145584725536985, 8: 41.145584725536985)	1	4.29829	80.9339
537	Q9UKT5	Single Protein	YSVIPQIQK	0	NH2-YSVIPQIQK<longub>-COOH	273	SR	VC	Long ubiquitination (9)		Long ubiquitination (9: 100.0)	Long ubiquitination (9: 77.98471824259789)	1	10.1889	94.9153
540	P09651	Related Proteins	IKEDTEEHHLR	1	NH2-IK<ub>EDTEEHHLR-COOH	112; 119; 112	GG; GG; GG	DY; DY; DY	Ubiquitination of K (2)		Ubiquitination of K (2: 100.0)	Ubiquitination of K (2: 99.18190567853705)	1	14.9867	96.5812
576	Q5TGY3	Single Protein	GGKAGGFGGRGGGHAAK	2	NH2-GGK<ub>AGGFGGRGGGHAAK<ub>-COOH	669	RR	SA	Ubiquitination of K (17, 3)		Ubiquitination of K (3: 100.0, 17: 100.0)	Ubiquitination of K (3: 43.040991420400374, 17: 43.040991420400374)	1	3.76751	70.6383
600	Q6E0U4	Single Protein	QNTPFLNWK	0	pyro-QNTPFLNWK<ub>-COOH	401	FK	AI	Pyrolidone from Q (1), Ubiquitination of K (9)		Pyrolidone from Q (0: 100.0), Ubiquitination of K (9: 100.0)	Pyrolidone from Q (1: 63.41814690350456), Ubiquitination of K (9: 63.41814690350456)	1	3.86659	75.2137
606	Q3KP44	Single Protein	FNVLNQIFCKNK	1	NH2-FNVLNQIFC<cmm>K<ub>NK<ub>-COOH	343	RR	KE	Carbamidomethylation of C (9), Ubiquitination of K (12, 10)		Carbamidomethylation of C (9: 100.0), Ubiquitination of K (10: 100.0, 12: 100.0)	Carbamidomethylation of C (9: 63.961813842482094), Ubiquitination of K (10: 63.961813842482094, 12: 63.961813842482094)	1	4.86076	82.5532
609	Q14571	Single Protein	HNKLLQQMLKPGSD	1	NH2-HNK<ub>LLQQMLK<ub>PGSD-COOH	2118	AR	PD	Ubiquitination of K (10, 3)		Ubiquitination of K (3: 100.0, 10: 100.0)	Ubiquitination of K (3: 39.77979894686453, 10: 39.77979894686453)	1	3.95586	74.7934
615	Q86XE0	Single Protein	NRKELLGGFLR	2	NH2-NRK<ub>ELLGGFLR-COOH	173	GK	NI	Ubiquitination of K (3)		Ubiquitination of K (3: 100.0)	Ubiquitination of K (3: 73.4742912061509)	1	8.45098	92.827
618	Q9P015	Single Protein	RDYGVQLVEEGADTFTAK	1	NH2-RDYGVQLVEEGADTFTAK<ub>-COOH	134	LK	VN	Ubiquitination of K (18)		Ubiquitination of K (18: 100.0)	Ubiquitination of K (18: 76.5774378585086)	1	4.24043	79.1489
648	Q96B26	Single Protein	LMDEVIKSMKPK	1	NH2-LM<ox>DEVIK<ub>SMK<ub>PK<ub>-COOH	265	KK		Oxidation of M (2), Ubiquitination of K (10, 12, 7)		Oxidation of M (2: 99.98153721167327, 9: 0.01846278832673352), Ubiquitination of K (7: 100.0, 10: 100.0, 12: 100.0)	Oxidation of M (2: 68.36832061068702), Ubiquitination of K (7: 68.36832061068702, 10: 68.36832061068702, 12: 68.36832061068702)	1	6.26419	90.1288
651	Q9Y6R4	Single Protein	LFCDIAGMLLK	0	NH2-LFCDIAGMLLK<ub>-COOH	750	GK	ST	Ubiquitination of K (11)		Ubiquitination of K (11: 100.0)	Ubiquitination of K (11: 58.65384615384615)	1	3.70356	67.2269
660	Q8IXT2	Single Protein	KGTTQPQVPSGK	1	NH2-K<ub>GTTQPQVPSGK<ub>-COOH	115	FR	EN	Ubiquitination of K (12, 1)		Ubiquitination of K (1: 100.0, 12: 100.0)	Ubiquitination of K (1: 71.45584725536993, 12: 71.45584725536993)	1	8.45098	92.827
661	Q309B1	Single Protein	TQVSAIVQRK	1	NH2-TQVSAIVQRK<ub>-COOH	129	IR	YW	Ubiquitination of K (10)		Ubiquitination of K (10: 100.0)	Ubiquitination of K (10: 84.30813124108415)	1	16.902	97.5104
717	P60709	Related Proteins	DLTDYLMKILTER	1	NH2-DLTDYLMK<ub>ILTER-COOH	184; 186; 184; 185; 186; 186; 185	GR; GR; GR; GR; GR; GR; GR	GY; GY; GY; GY; GY; GY; GY	Ubiquitination of K (8)		Ubiquitination of K (8: 100.0)	Ubiquitination of K (8: 83.34124347413385)	1	16.6276	97.0085
768	Q9NQS7	Single Protein	RNTPLRMDPK	2	NH2-RNTPLRM<ox>DPK<longub>-COOH	522	IK	CS	Long ubiquitination (10), Oxidation of M (7)		Long ubiquitination (10: 100.0), Oxidation of M (7: 100.0)	Long ubiquitination (10: 72.90969899665552), Oxidation of M (7: 72.90969899665552)	2	11.6914	94.9044
855	Q9NRS6	Single Protein	DPEDVKEVVVWKR	2	NH2-DPEDVK<ub>EVVVWK<ub>R-COOH	39	KK	YS	Ubiquitination of K (12, 6)		Ubiquitination of K (6: 100.0, 12: 100.0)	Ubiquitination of K (6: 68.36832061068702, 12: 68.36832061068702)	1	6.26419	90.1288
901	Q96JG9	Single Protein	VNPSGLEGGTVEGGK	0	NH2-VNPSGLEGGTVEGGK<ub>-COOH	1907	PR	VA	Ubiquitination of K (15)		Ubiquitination of K (15: 100.0)	Ubiquitination of K (15: 78.60911270983213)	1	11.635	94.8936
943	O60673	Single Protein	YPGSLSSTVHSENSHK	0	NH2-YPGSLSSTVHSENSHK<ub>-COOH	627	MK	EN	Ubiquitination of K (16)		Ubiquitination of K (16: 100.0)	Ubiquitination of K (16: 41.145584725536985)	1	4.29829	80.9339
950	Q14204	Single Protein	EPPPGVKANMLR	1	NH2-EPPPGVK<ub>ANM<ox>LR-COOH	4148	VF	TF	Oxidation of M (10), Ubiquitination of K (7)		Oxidation of M (10: 100.0), Ubiquitination of K (7: 100.0)	Oxidation of M (10: 63.961813842482094), Ubiquitination of K (7: 63.961813842482094)	1	4.86076	82.5532
958	O95221	Single Protein	MLADLLSEK	0	NH2-M<ox>LADLLSEK<ub>-COOH	81	PK	KT	Oxidation of M (1), Ubiquitination of K (9)		Oxidation of M (1: 100.0), Ubiquitination of K (9: 100.0)	Oxidation of M (1: 41.145584725536985), Ubiquitination of K (9: 41.145584725536985)	1	4.29829	80.9339
966	Q96JM2	Single Protein	VNLDQLEQMK	0	NH2-VNLDQLEQMK<ub>-COOH	2363	GR	EK	Ubiquitination of K (10)		Ubiquitination of K (10: 100.0)	Ubiquitination of K (10: 40.30710172744721)	1	4.03958	78.481
1016	Q92826	Single Protein	MEPGNYATLDGAK	0	NH2-M<ox>EPGNYATLDGAK<ub>-COOH	1		DI	Oxidation of M (1), Ubiquitination of K (13)		Oxidation of M (1: 100.0), Ubiquitination of K (13: 100.0)	Oxidation of M (1: 75.81947743467934), Ubiquitination of K (13: 75.81947743467934)	1	11.5922	94.6058
1025	Q8TEU7	Single Protein	GFGIFVEGVEPGSKAADSGLK	1	NH2-GFGIFVEGVEPGSK<ub>AADSGLK<ub>-COOH	553	EK	RG	Ubiquitination of K (21, 14)		Ubiquitination of K (14: 100.0, 21: 100.0)	Ubiquitination of K (14: 73.6766809728183, 21: 73.6766809728183)	1	4.03403	76.4228
1064	Q6KB66	Single Protein	TKLAQLEAA	1	NH2-TK<longub>LAQLEAA-COOH	343	AK	LQ	Long ubiquitination (2)		Long ubiquitination (2: 100.0)	Long ubiquitination (2: 58.65384615384615)	1	3.70356	67.2269
1067	Q8TEB7	Single Protein	GIQVTMVIEVGK	0	NH2-GIQVTMVIEVGK<ub>-COOH	186	QR	KH	Ubiquitination of K (12)		Ubiquitination of K (12: 100.0)	Ubiquitination of K (12: 40.30710172744721)	1	4.03958	78.481
1097	Q0P6H9	Single Protein	DPGRAVDLEK	1	NH2-DPGRAVDLEK<longub>-COOH	71	FR	FC	Long ubiquitination (10)		Long ubiquitination (10: 100.0)	Long ubiquitination (10: 55.796055796055796)	1	3.84214	72.5738
1151	Q9BXP8	Single Protein	EKLPILCTK	1	NH2-EK<ub>LPILCTK<ub>-COOH	1627	ER	EG	Ubiquitination of K (9, 2)		Ubiquitination of K (2: 100.0, 9: 100.0)	Ubiquitination of K (2: 55.796055796055796, 9: 55.796055796055796)	1	3.84214	72.5738
1169	Q13285	Single Protein	FIILFSLDLK	0	NH2-FIILFSLDLK<ub>-COOH	373	LK	FL	Ubiquitination of K (10)		Ubiquitination of K (10: 100.0)	Ubiquitination of K (10: 63.41814690350456)	1	3.86659	75.2137
1212	Q14159	Single Protein	QLEGKSCSLVGMK	1	pyro-QLEGK<ub>SCSLVGM<ox>K<ub>-COOH	541	AR	VL	Oxidation of M (12), Pyrolidone from Q (1), Ubiquitination of K (13, 5)		Oxidation of M (12: 100.0), Pyrolidone from Q (0: 100.0), Ubiquitination of K (5: 100.0, 13: 100.0)	Oxidation of M (12: 59.656652360515025), Pyrolidone from Q (1: 59.656652360515025), Ubiquitination of K (5: 59.656652360515025, 13: 59.656652360515025)	1	4.03449	77.1186
1224	A0A1B0GV03	Single Protein	QEKQMLKQK	2	pyro-QEK<ub>QM<ox>LK<ub>QK<ub>-COOH	344	RK	EQ	Oxidation of M (5), Pyrolidone from Q (1), Ubiquitination of K (9, 3, 7)		Oxidation of M (5: 100.0), Pyrolidone from Q (0: 100.0), Ubiquitination of K (3: 100.0, 7: 100.0, 9: 100.0)	Oxidation of M (5: 73.6766809728183), Pyrolidone from Q (1: 73.6766809728183), Ubiquitination of K (3: 73.6766809728183, 7: 73.6766809728183, 9: 73.6766809728183)	1	10.048	94.958
1292	P33176	Single Protein	TKSTLLFGQR	1	NH2-TK<ub>STLLFGQR-COOH	312	SE	AK	Ubiquitination of K (2)		Ubiquitination of K (2: 100.0)	Ubiquitination of K (2: 55.796055796055796)	1	3.84214	72.5738
1319	Q13423	Single Protein	QKTVAELEAEK	1	NH2-QK<ub>TVAELEAEK<ub>-COOH	452	VK	AA	Ubiquitination of K (2, 11)		Ubiquitination of K (2: 100.0, 11: 100.0)	Ubiquitination of K (2: 39.77979894686453, 11: 39.77979894686453)	1	3.95586	74.7934
1323	P04843	Single Protein	RNVESYTK	1	NH2-RNVESYTK<ub>-COOH	180	AS	LG	Ubiquitination of K (8)		Ubiquitination of K (8: 100.0)	Ubiquitination of K (8: 58.65384615384615)	1	3.70356	67.2269
1379	Q03001	Single Protein	AREGLEKMVAEDNER	2	NH2-AREGLEK<ub>M<ox>VAEDNER-COOH	5794	WR	YR	Oxidation of M (8), Ubiquitination of K (7)		Oxidation of M (8: 100.0), Ubiquitination of K (7: 100.0)	Oxidation of M (8: 50.861244019138766), Ubiquitination of K (7: 50.861244019138766)	2	5.85903	87.2428
1435	Q96HS1	Single Protein	REPLSLINVRK	2	NH2-REPLSLINVRK<ub>-COOH	65	DR	RN	Ubiquitination of K (11)		Ubiquitination of K (11: 100.0)	Ubiquitination of K (11: 70.18129770992367)	1	6.69007	91.3223
1473	O00391	Single Protein	AKEVLPAIR	1	NH2-AK<ub>EVLPAIR-COOH	432	AK	GY	Ubiquitination of K (2)		Ubiquitination of K (2: 100.0)	Ubiquitination of K (2: 43.040991420400374)	1	3.76751	70.6383
1479	P23229	Single Protein	YIDNLEKK	1	NH2-YIDNLEK<ub>K<ub>-COOH	1110	EK	QW	Ubiquitination of K (8, 7)		Ubiquitination of K (7: 100.0, 8: 100.0)	Ubiquitination of K (7: 68.62085535800095, 8: 68.62085535800095)	1	5.89348	87.5
1506	Q8N680	Single Protein	TFSTPNEVVK	0	NH2-TFSTPNEVVK<ub>-COOH	456	DK	HS	Ubiquitination of K (10)		Ubiquitination of K (10: 100.0)	Ubiquitination of K (10: 58.65384615384615)	1	3.70356	67.2269
1557	Q9P266	Single Protein	MKEVSSVSR	1	NH2-MK<longub>EVSSVSR-COOH	1262	MR	MR	Long ubiquitination (2)		Long ubiquitination (2: 100.0)	Long ubiquitination (2: 63.961813842482094)	1	4.86076	82.5532
1560	P35637	Single Protein	PKPDGPGGGPGGSHMGGNYGDDR	0	NH2-PK<ub>PDGPGGGPGGSHMGGNYGDDR-COOH	450	KA	RG	Ubiquitination of K (2)		Ubiquitination of K (2: 100.0)	Ubiquitination of K (2: 99.91220368744513)	1	25.5023	99.5798
1564	Q9BZ72	Single Protein	GPLSENWIEEYK	0	NH2-GPLSENWIEEYK<ub>-COOH	170	QR	KQ	Ubiquitination of K (12)		Ubiquitination of K (12: 100.0)	Ubiquitination of K (12: 65.20495710200191)	1	6.0206	88.9831
1588	Q13616	Single Protein	SPELLARYCDSLLK	1	NH2-SPELLARYCDSLLK<longub>-COOH	418	SK	KS	Long ubiquitination (14)		Long ubiquitination (14: 100.0)	Long ubiquitination (14: 72.23809523809524)	1	3.84838	72.6496
1607	Q96D71	Single Protein	VESINTVKDLPLPR	1	NH2-VESINTVK<longub>DLPLPR-COOH	87	LR	FV	Long ubiquitination (8)		Long ubiquitination (8: 100.0)	Long ubiquitination (8: 73.6766809728183)	1	10.048	94.958
1656	Q9Y2V3	Single Protein	LHSIEAILGFTK	0	NH2-LHSIEAILGFTK<ub>-COOH	32	SR	DD	Ubiquitination of K (12)		Ubiquitination of K (12: 100.0)	Ubiquitination of K (12: 63.41814690350456)	1	3.86659	75.2137
1668	Q8WZ42	Single Protein	EVTLDDISQIKAQVK	1	pyro-EVTLDDISQIK<ub>AQVK<ub>-COOH	12561	MK	EL	Pyrolidone from E (1), Ubiquitination of K (15, 11)		Pyrolidone from E (0: 100.0), Ubiquitination of K (11: 100.0, 15: 100.0)	Pyrolidone from E (1: 70.18129770992367), Ubiquitination of K (11: 70.18129770992367, 15: 70.18129770992367)	1	3.71141	68.7243
1696	A6QL63	Single Protein	FKQDLGFRMLNCGR	2	NH2-FK<ub>QDLGFRM<ox>LNCGR-COOH	568	AK	TD	Oxidation of M (9), Ubiquitination of K (2)		Oxidation of M (9: 100.0), Ubiquitination of K (2: 100.0)	Oxidation of M (9: 40.30710172744721), Ubiquitination of K (2: 40.30710172744721)	1	4.03958	78.481
1703	O75369	Single Protein	EVGKDQEFTVDTR	1	pyro-EVGK<ub>DQEFTVDTR-COOH	957	RV	GA	Pyrolidone from E (1), Ubiquitination of K (4)		Pyrolidone from E (0: 100.0), Ubiquitination of K (4: 100.0)	Pyrolidone from E (1: 99.76258309591643), Ubiquitination of K (4: 99.76258309591643)	1	100	100
1726	Q15814	Single Protein	TRGKDAASSTK	2	NH2-TRGK<ub>DAASSTK<ub>-COOH	141	FK	VD	Ubiquitination of K (4, 11)		Ubiquitination of K (4: 100.0, 11: 100.0)	Ubiquitination of K (4: 87.49398749398749, 11: 87.49398749398749)	1	100	100
1743	O95125	Single Protein	KNLEETSPVTQAER	1	NH2-K<ub>NLEETSPVTQAER-COOH	460	NR	TP	Ubiquitination of K (1)		Ubiquitination of K (1: 100.0)	Ubiquitination of K (1: 58.65384615384615)	1	3.70356	67.2269
1756	Q9Y3R0	Single Protein	HDEIISLLK	0	NH2-HDEIISLLK<ub>-COOH	114	FR	NV	Ubiquitination of K (9)		Ubiquitination of K (9: 100.0)	Ubiquitination of K (9: 72.90969899665552)	1	7.92392	91.4634
1838	P13797	Single Protein	QKLMLDGDR	1	pyro-QK<ub>LMLDGDR-COOH	58	II	NK	Pyrolidone from Q (1), Ubiquitination of K (2)		Pyrolidone from Q (0: 100.0), Ubiquitination of K (2: 100.0)	Pyrolidone from Q (1: 39.77979894686453), Ubiquitination of K (2: 39.77979894686453)	1	3.95586	74.7934
1856	Q96LP6	Single Protein	MSTVICMKQR	1	ace-MSTVIC<cmm>MK<ub>QR-COOH	1		EE	Acetylation of protein N-term (1), Carbamidomethylation of C (6), Ubiquitination of K (8)		Acetylation of protein N-term (0: 100.0), Carbamidomethylation of C (6: 100.0), Ubiquitination of K (8: 100.0)	Acetylation of protein N-term (1: 55.796055796055796), Carbamidomethylation of C (6: 55.796055796055796), Ubiquitination of K (8: 55.796055796055796)	1	3.84214	72.5738
1915	Q14676	Single Protein	GPGAPGLAHLQESQAGSDTDVEEGK	0	NH2-GPGAPGLAHLQESQAGSDTDVEEGK<ub>-COOH	360	TR	AP	Ubiquitination of K (25)		Ubiquitination of K (25: 100.0)	Ubiquitination of K (25: 85.31368821292776)	2	6.89433	92.2449
1948	Q8N4T0	Single Protein	EALLTYKSDPAMR	1	pyro-EALLTYK<ub>SDPAM<ox>R-COOH	212	VK	KM	Oxidation of M (12), Pyrolidone from E (1), Ubiquitination of K (7)		Oxidation of M (12: 100.0), Pyrolidone from E (0: 100.0), Ubiquitination of K (7: 100.0)	Oxidation of M (12: 71.69900615238997), Pyrolidone from E (1: 71.69900615238997), Ubiquitination of K (7: 71.69900615238997)	1	8.59185	92.3404
1958	Q9NYI0	Single Protein	LYQLDRFK	1	NH2-LYQLDRFK<ub>-COOH	592	KR	RS	Ubiquitination of K (8)		Ubiquitination of K (8: 100.0)	Ubiquitination of K (8: 70.18129770992367)	1	6.69007	91.3223
1973	Q15185	Single Protein	KGESGQSWPR	1	NH2-K<ub>GESGQSWPR-COOH	79	LR	LT	Ubiquitination of K (1)		Ubiquitination of K (1: 100.0)	Ubiquitination of K (1: 41.145584725536985)	1	4.29829	80.9339
1980	Q8NB16	Single Protein	FKAALEEANGEIEK	1	NH2-FK<ub>AALEEANGEIEK<ub>-COOH	65	NR	FS	Ubiquitination of K (2, 14)		Ubiquitination of K (2: 100.0, 14: 100.0)	Ubiquitination of K (2: 68.36832061068702, 14: 68.36832061068702)	1	6.26419	90.1288
1984	Q9BZ95	Single Protein	GIGNKTEISVR	1	NH2-GIGNK<ub>TEISVR-COOH	528	TK	GQ	Ubiquitination of K (5)		Ubiquitination of K (5: 100.0)	Ubiquitination of K (5: 58.65384615384615)	1	3.70356	67.2269
2032	Q9UPP1	Single Protein	RHPASYLVHGGK	1	NH2-RHPASYLVHGGK<ub>-COOH	423	NR	AL	Ubiquitination of K (12)		Ubiquitination of K (12: 100.0)	Ubiquitination of K (12: 55.796055796055796)	1	3.84214	72.5738
2075	Q8WZ42	Single Protein	KPEAPPPKVPEAPKEVVPEK	2	NH2-K<ub>PEAPPPK<ub>VPEAPK<ub>EVVPEK<ub>-COOH	11444	AK	KV	Ubiquitination of K (8, 1, 20, 14)		Ubiquitination of K (1: 100.0, 8: 100.0, 14: 100.0, 20: 100.0)	Ubiquitination of K (1: 62.601626016260155, 8: 62.601626016260155, 14: 62.601626016260155, 20: 62.601626016260155)	1	6.53213	91.0256
2100	Q5VZL5	Single Protein	MLPSVPATAVRVSCSGCKK	2	NH2-M<ox>LPSVPATAVRVSCSGC<cmm>K<longub>K<longub>-COOH	328	NK	IL	Carbamidomethylation of C (17), Long ubiquitination (18, 19), Oxidation of M (1)		Carbamidomethylation of C (14: 50.0, 17: 50.0), Long ubiquitination (18: 100.0, 19: 100.0), Oxidation of M (1: 100.0)	Carbamidomethylation of C (17: 70.44917257683215), Long ubiquitination (18: 70.44917257683215, 19: 70.44917257683215), Oxidation of M (1: 70.44917257683215)	1	3.73318	68.7243
2102	Q92805	Single Protein	MLELRKTLQK	2	NH2-M<ox>LELRK<ub>TLQK<ub>-COOH	644	QR	EL	Oxidation of M (1), Ubiquitination of K (6, 10)		Oxidation of M (1: 100.0), Ubiquitination of K (6: 100.0, 10: 100.0)	Oxidation of M (1: 42.00956937799043), Ubiquitination of K (6: 42.00956937799043, 10: 42.00956937799043)	1	3.95707	76.6129
2103	Q15149	Single Protein	KGLIPREQGLR	2	NH2-K<ub>GLIPREQGLR-COOH	3259	LK	LL	Ubiquitination of K (1)		Ubiquitination of K (1: 100.0)	Ubiquitination of K (1: 58.65384615384615)	1	3.70356	67.2269
2184	Q9NZM3	Single Protein	EFLKKLASDPR	2	pyro-EFLK<ub>K<ub>LASDPR-COOH	1327	FK	CK	Pyrolidone from E (1), Ubiquitination of K (4, 5)		Pyrolidone from E (0: 100.0), Ubiquitination of K (4: 100.0, 5: 100.0)	Pyrolidone from E (1: 71.45584725536993), Ubiquitination of K (4: 71.45584725536993, 5: 71.45584725536993)	1	8.45098	92.827
2201	Q6IQ32	Single Protein	SGEKLEPEK	1	NH2-SGEK<ub>LEPEK<ub>-COOH	723	SK	LA	Ubiquitination of K (4, 9)		Ubiquitination of K (4: 100.0, 9: 100.0)	Ubiquitination of K (4: 63.961813842482094, 9: 63.961813842482094)	1	4.86076	82.5532
2253	Q9NR96	Single Protein	VLDLSENFLYK	0	NH2-VLDLSENFLYK<longub>-COOH	312	LR	CI	Long ubiquitination (11)		Long ubiquitination (11: 100.0)	Long ubiquitination (11: 72.90969899665552)	1	7.92392	91.4634
2277	P55060	Single Protein	YPLLLLTLLEK	0	NH2-YPLLLLTLLEK<ub>-COOH	42	QN	SQ	Ubiquitination of K (11)		Ubiquitination of K (11: 100.0)	Ubiquitination of K (11: 33.58662613981763)	2	4.11787	78.9431
2278	Q9UBF8	Single Protein	PEDPSAVALKEPWQEK	1	NH2-PEDPSAVALK<ub>EPWQEK<ub>-COOH	525	RD	VR	Ubiquitination of K (16, 10)		Ubiquitination of K (10: 100.0, 16: 100.0)	Ubiquitination of K (10: 42.00956937799043, 16: 42.00956937799043)	1	3.95707	76.6129
2337	A6NGD5	Single Protein	GDALNLRGLK	1	NH2-GDALNLRGLK<ub>-COOH	289	SR	RS	Ubiquitination of K (10)		Ubiquitination of K (10: 100.0)	Ubiquitination of K (10: 59.656652360515025)	1	4.03449	77.1186
2358	Q4ADV7	Single Protein	EPIPDPLLPTVAK	0	NH2-EPIPDPLLPTVAK<ub>-COOH	877	SR	FI	Ubiquitination of K (13)		Ubiquitination of K (13: 100.0)	Ubiquitination of K (13: 83.34124347413385)	1	5.45878	87.9828
2375	Q9UJA3	Single Protein	KGSILVDFK	1	NH2-K<ub>GSILVDFK<ub>-COOH	118	ER	EL	Ubiquitination of K (1, 9)		Ubiquitination of K (1: 100.0, 9: 100.0)	Ubiquitination of K (1: 72.23809523809524, 9: 72.23809523809524)	1	8.03262	92.1162
2470	Q96IF1	Single Protein	ERLGEKASR	2	NH2-ERLGEK<longub>ASR-COOH	2	M	LL	Long ubiquitination (6)		Long ubiquitination (6: 100.0)	Long ubiquitination (6: 41.145584725536985)	1	4.29829	80.9339
2474	Q96M86	Single Protein	TLSQAQCGQYHK	0	NH2-TLSQAQCGQYHK<ub>-COOH	3398	AK	WP	Ubiquitination of K (12)		Ubiquitination of K (12: 100.0)	Ubiquitination of K (12: 59.656652360515025)	1	4.03449	77.1186
2515	Q9UJG1	Single Protein	EVVATLLPSAK	0	NH2-EVVATLLPSAK<ub>-COOH	112	RK	EQ	Ubiquitination of K (11)		Ubiquitination of K (11: 100.0)	Ubiquitination of K (11: 63.961813842482094)	1	4.86076	82.5532
2559	P62805	Single Protein	VLKVFLENVIR	1	NH2-VLK<ub>VFLENVIR-COOH	58	RG	DA	Ubiquitination of K (3)		Ubiquitination of K (3: 100.0)	Ubiquitination of K (3: 98.17658349328215)	1	100	100
2660	Q6P2Q9	Single Protein	GQKRLGQLAK	2	NH2-GQK<ub>RLGQLAK<ub>-COOH	1829	WA	WK	Ubiquitination of K (10, 3)		Ubiquitination of K (3: 100.0, 10: 100.0)	Ubiquitination of K (3: 82.16833095577746, 10: 82.16833095577746)	1	15.141	97.0833
2662	P26640	Single Protein	MRGETTLWNPGCDHAGIATQVVVEKK	2	NH2-MRGETTLWNPGCDHAGIATQVVVEK<ub>K<ub>-COOH	370	HR	LW	Ubiquitination of K (25, 26)		Ubiquitination of K (25: 100.0, 26: 100.0)	Ubiquitination of K (25: 68.36832061068702, 26: 68.36832061068702)	1	5.44068	86.25
2664	Q16629	Single Protein	VYVGNLGTGAGK	0	NH2-VYVGNLGTGAGK<ub>-COOH	13	TK	GE	Ubiquitination of K (12)		Ubiquitination of K (12: 100.0)	Ubiquitination of K (12: 68.62085535800095)	1	5.89348	87.5
2697	Q86UQ4	Single Protein	VLFSALTVALSGK	0	NH2-VLFSALTVALSGK<ub>-COOH	3108	SK	CD	Ubiquitination of K (13)		Ubiquitination of K (13: 100.0)	Ubiquitination of K (13: 63.41814690350456)	1	3.86659	75.2137
2740	O94808	Single Protein	QMPVIMVIMKD	1	NH2-QM<ox>PVIMVIMK<ub>D-COOH	587	DK	PC	Oxidation of M (2), Ubiquitination of K (10)		Oxidation of M (2: 99.99999998463642, 6: 7.681794994946636E-9, 9: 7.681794994946636E-9), Ubiquitination of K (10: 100.0)	Oxidation of M (2: 71.3326941514861), Ubiquitination of K (10: 71.3326941514861)	1	7.03518	93.1624
2755	O95238	Related Proteins	NRPAMNYDK	0	NH2-NRPAMNYDK<longub>-COOH	296; 413; 386; 380	RK; QK; QK; QK	LS; LS; LS; LS	Long ubiquitination (9)		Long ubiquitination (9: 100.0)	Long ubiquitination (9: 40.30710172744721)	1	4.03958	78.481
2756	Q5VWN6	Single Protein	VDILDAAVQTK	0	NH2-VDILDAAVQTK<ub>-COOH	1003	NK	TG	Ubiquitination of K (11)		Ubiquitination of K (11: 100.0)	Ubiquitination of K (11: 39.77979894686453)	1	3.95586	74.7934
2772	P61254	Related Proteins	MKFNPFVTSDRSK	2	NH2-MK<ub>FNPFVTSDRSK<ub>-COOH	1; 1		NR; NR	Ubiquitination of K (13, 2)		Ubiquitination of K (2: 100.0, 13: 100.0)	Ubiquitination of K (2: 43.040991420400374, 13: 43.040991420400374)	1	3.76751	70.6383
2774	Q15771	Single Protein	LFKIVLIGNAGVGK	1	NH2-LFK<ub>IVLIGNAGVGK<ub>-COOH	9	DF	TC	Ubiquitination of K (14, 3)		Ubiquitination of K (3: 100.0, 14: 100.0)	Ubiquitination of K (3: 71.57794676806084, 14: 71.57794676806084)	1	8.84607	92.4051
2867	Q13823	Single Protein	HLIFVLNK	0	NH2-HLIFVLNK<ub>-COOH	249	WK	CD	Ubiquitination of K (8)		Ubiquitination of K (8: 100.0)	Ubiquitination of K (8: 70.9585121602289)	1	6.86961	91.8103
2871	P36873	Single Protein	DLDKLNIDSIIQR	1	NH2-DLDK<ub>LNIDSIIQR-COOH	3	MA	LL	Ubiquitination of K (4)		Ubiquitination of K (4: 100.0)	Ubiquitination of K (4: 82.36124176857949)	1	19.3952	98.7124
2929	P12270	Single Protein	LRGANEKLAVAEVR	2	NH2-LRGANEK<ub>LAVAEVR-COOH	767	QD	AE	Ubiquitination of K (7)		Ubiquitination of K (7: 100.0)	Ubiquitination of K (7: 69.56106870229007)	1	6.15424	90.3766
2938	Q9UBS4	Single Protein	KLALQLHPDRNPDD	2	NH2-K<ub>LALQLHPDRNPDD-COOH	47	YR	PQ	Ubiquitination of K (1)		Ubiquitination of K (1: 100.0)	Ubiquitination of K (1: 63.961813842482094)	1	4.86076	82.5532

## Sheet: D4h Ub-proteins
Sample	Protein(s)	Protein Inference	Sequence	Missed Cleavages	Modified Sequence	Position	AAs Before	AAs After	Variable Modifications	Fixed Modifications	Probabilistic PTM score	D-score	#PSMs	Score	Confidence [%]
AKT_03	P0CG47	Related and Unrelated Proteins	LIFAGKQLEDGR	1	NH2-LIFAGK<ubq long k>QLEDGR-COOH	43, 119, 195; 43, 119, 195, 271, 347, 423, 499, 575, 651; 43; 43	QR, QR, QR; QR, QR, QR, QR, QR, QR, QR, QR, QR; QR; QR	TL, TL, TL; TL, TL, TL, TL, TL, TL, TL, TL, TL; TL; TL	Ubiquitination long of K (6)		Ubiquitination long of K (6: 100.0)	Ubiquitination long of K (6: 97.38868429862738)	4	64.9223	99.855
AKT_03	Q6EKJ0	Related Proteins	MDHVMDVVVK	0	NH2-M<ox>DHVM<ox>DVVVK<ub>-COOH	667; 667	LK; LK	SV; SV	Oxidation of M (1, 5), Ubiquitination of K (10)		Oxidation of M (1: 100.0, 5: 100.0), Ubiquitination of K (10: 100.0)	Oxidation of M (1: 68.42279655400928, 5: 68.42279655400928), Ubiquitination of K (10: 68.42279655400928)	3	8.85482	77.8327
AKT_03	Q16288	Related Proteins	WMPPESIMYRK	1	NH2-WM<ox>PPESIMYRK<ub>-COOH	736; 719	IR; IR	FT; FT	Oxidation of M (2), Ubiquitination of K (11)		Oxidation of M (2: 99.99999999999996, 8: 50.0), Ubiquitination of K (11: 100.0)	Oxidation of M (2: 41.081625797783005), Ubiquitination of K (11: 41.081625797783005)	24	53.6669	99.8199
AKT_03	Q07889	Related Proteins	WAIADAQSAIEK	0	NH2-WAIADAQSAIEK<ub>-COOH	85; 85	DK; DK	RK; RK	Ubiquitination of K (12)		Ubiquitination of K (12: 100.0)	Ubiquitination of K (12: 96.14082599864591)	2	21.1383	96.2084
AKT_03	Q6P2I3	Related Proteins	GDEVQCEIEELGVIINK	0	NH2-GDEVQCEIEELGVIINK<ub>-COOH	296; 296	KK; KK	VV; VV	Ubiquitination of K (17)		Ubiquitination of K (17: 100.0)	Ubiquitination of K (17: 60.42496679946879)	9	14.8309	93.3962
AKT_03	Q96LP6	Single Protein	MSTVICMKQR	1	ace-MSTVIC<cmm>MK<ub>QR-COOH	1		EE	Acetylation of protein N-term (1), Carbamidomethylation of C (6), Ubiquitination of K (8)		Acetylation of protein N-term (0: 100.0), Carbamidomethylation of C (6: 100.0), Ubiquitination of K (8: 100.0)	Acetylation of protein N-term (1: 34.61153717905968), Carbamidomethylation of C (6: 34.61153717905968), Ubiquitination of K (8: 34.61153717905968)	5	11.3857	86.7296
AKT_03	A0JNW5	Single Protein	CPPNLAPLCVSYKNMK	1	NH2-C<cmm>PPNLAPLC<cmm>VSYK<ub>NMK<ub>-COOH	1090	ER	RS	Carbamidomethylation of C (1, 9), Ubiquitination of K (16, 13)		Carbamidomethylation of C (1: 100.0, 9: 100.0), Ubiquitination of K (13: 100.0, 16: 100.0)	Carbamidomethylation of C (1: 61.42164781906301, 9: 61.42164781906301), Ubiquitination of K (13: 61.42164781906301, 16: 61.42164781906301)	26	40.7111	95.2606
AKT_03	P35609	Single Protein	ELPPDQAQYCIK	0	NH2-ELPPDQAQYC<cmm>IK<ub>-COOH	853	RR	RM	Carbamidomethylation of C (10), Ubiquitination of K (12)		Carbamidomethylation of C (10: 100.0), Ubiquitination of K (12: 100.0)	Carbamidomethylation of C (10: 100.0), Ubiquitination of K (12: 100.0)	2	100	100
AKT_03	Q6DN72	Single Protein	LWTAVLLFVPCVGK	0	NH2-LWTAVLLFVPC<cmm>VGK<ubq long k>-COOH	3	ML	TV	Carbamidomethylation of C (11), Ubiquitination long of K (14)		Carbamidomethylation of C (11: 100.0), Ubiquitination long of K (14: 100.0)	Carbamidomethylation of C (11: 69.8570953805251), Ubiquitination long of K (14: 69.8570953805251)	5	13.6518	92.381
AKT_03	Q96N53	Single Protein	AACARAKPASRAPEGPVSR	2	NH2-AAC<cmm>ARAK<ubq long k>PASRAPEGPVSR-COOH	69	PR	KT	Carbamidomethylation of C (3), Ubiquitination long of K (7)		Carbamidomethylation of C (3: 100.0), Ubiquitination long of K (7: 100.0)	Carbamidomethylation of C (3: 87.97319932998326), Ubiquitination long of K (7: 87.97319932998326)	4	17.4206	95.2606
AKT_03	Q8NFY9	Single Protein	QTVPCLDIVTGRVFK	1	NH2-QTVPC<cmm>LDIVTGRVFK<ub>-COOH	302	KK	LC	Carbamidomethylation of C (5), Ubiquitination of K (15)		Carbamidomethylation of C (5: 100.0), Ubiquitination of K (15: 100.0)	Carbamidomethylation of C (5: 85.64753004005341), Ubiquitination of K (15: 85.64753004005341)	1	12.8083	91.4286
AKT_03	Q9P2D7	Single Protein	LKYKWCEVGVLDYDEEK	2	NH2-LK<ubq long k>YK<ubq long k>WC<cmm>EVGVLDYDEEK<ubq long k>-COOH	298	QK	KL	Carbamidomethylation of C (6), Ubiquitination long of K (17, 2, 4)		Carbamidomethylation of C (6: 100.0), Ubiquitination long of K (2: 100.0, 4: 100.0, 17: 100.0)	Carbamidomethylation of C (6: 71.42857142857143), Ubiquitination long of K (2: 71.42857142857143, 4: 71.42857142857143, 17: 71.42857142857143)	3	9.61158	79.6226
AKT_03	P21860	Single Protein	CWGPGSEDCQTLTK	0	NH2-CWGPGSEDC<cmm>QTLTK<ub>-COOH	194	GR	TI	Carbamidomethylation of C (9), Ubiquitination of K (14)		Carbamidomethylation of C (1: 50.0, 9: 50.0), Ubiquitination of K (14: 100.0)	Carbamidomethylation of C (9: 77.78144602178936), Ubiquitination of K (14: 77.78144602178936)	1	9.54243	79.2453
AKT_03	Q6ZMY6	Single Protein	WILSASKDRTMR	2	NH2-WILSASK<ub>DRTM<ox>R-COOH	377	KK	LW	Oxidation of M (11), Ubiquitination of K (7)		Oxidation of M (11: 100.0), Ubiquitination of K (7: 100.0)	Oxidation of M (11: 63.323303243062526), Ubiquitination of K (7: 63.323303243062526)	14	38.8457	95.2381
AKT_03	P04083	Single Protein	IMVSRSEIDMNDIK	1	NH2-IM<ox>VSRSEIDMNDIK<ub>-COOH	299	IR	AF	Oxidation of M (2), Ubiquitination of K (14)		Oxidation of M (2: 99.9999999983601, 10: 50.0), Ubiquitination of K (14: 100.0)	Oxidation of M (2: 54.37086092715232), Ubiquitination of K (14: 54.37086092715232)	8	18.2726	97.1429
AKT_03	P18206	Single Protein	TCKMLGQMTDQVADLR	1	NH2-TCK<ubq long k>M<ox>LGQMTDQVADLR-COOH	324	LG	AR	Oxidation of M (4), Ubiquitination long of K (3)		Oxidation of M (4: 99.99999223502753, 8: 0.043067023978379776), Ubiquitination long of K (3: 100.0)	Oxidation of M (4: 100.0), Ubiquitination long of K (3: 100.0)	2	100	100
AKT_03	Q32M92	Single Protein	VDGLMLKPTLLTPSQLK	0	NH2-VDGLM<ox>LK<ub>PTLLTPSQLK<ub>-COOH	92	SR	SP	Oxidation of M (5), Ubiquitination of K (17, 7)		Oxidation of M (5: 100.0), Ubiquitination of K (7: 100.0, 17: 100.0)	Oxidation of M (5: 95.13657561625583), Ubiquitination of K (7: 95.13657561625583, 17: 95.13657561625583)	1	17.8533	96.2261
AKT_03	P46060	Single Protein	TRLLVHMGLLKSEDK	2	NH2-TRLLVHM<ox>GLLK<ub>SEDK<ub>-COOH	514	FL	VK	Oxidation of M (7), Ubiquitination of K (11, 15)		Oxidation of M (7: 100.0), Ubiquitination of K (11: 100.0, 15: 100.0)	Oxidation of M (7: 61.42164781906301), Ubiquitination of K (11: 61.42164781906301, 15: 61.42164781906301)	3	10.0417	81.2169
AKT_03	P35711	Single Protein	IGEYKAIMR	1	NH2-IGEYK<ubq long k>AIM<ox>R-COOH	642	LR	NR	Oxidation of M (8), Ubiquitination long of K (5)		Oxidation of M (8: 100.0), Ubiquitination long of K (5: 100.0)	Oxidation of M (8: 65.20584329349269), Ubiquitination long of K (5: 65.20584329349269)	6	13.1938	91.5858
AKT_03	Q8WVK7	Single Protein	AEVDKLELMFQK	1	NH2-AEVDK<ub>LELM<ox>FQK<ub>-COOH	3	ME	AE	Oxidation of M (9), Ubiquitination of K (12, 5)		Oxidation of M (9: 100.0), Ubiquitination of K (5: 100.0, 12: 100.0)	Oxidation of M (9: 93.04029304029304), Ubiquitination of K (5: 93.04029304029304, 12: 93.04029304029304)	1	15.2412	93.3962
AKT_03	Q5T8P6	Single Protein	ELLDTELDLYK	0	pyro-ELLDTELDLYK<ub>-COOH	813	QK	KM	Pyrolidone from E (1), Ubiquitination of K (11)		Pyrolidone from E (0: 100.0), Ubiquitination of K (11: 100.0)	Pyrolidone from E (1: 67.83050847457628), Ubiquitination of K (11: 67.83050847457628)	5	17.0499	94.4699
AKT_03	O14756	Single Protein	ERQVVSHLQDK	1	pyro-ERQVVSHLQDK<ub>-COOH	20	YR	YV	Pyrolidone from E (1), Ubiquitination of K (11)		Pyrolidone from E (0: 100.0), Ubiquitination of K (11: 100.0)	Pyrolidone from E (1: 81.59203980099502), Ubiquitination of K (11: 81.59203980099502)	1	12.0185	89.1015
AKT_03	P14868	Single Protein	ERYGISSMIQSQEKPDR	1	pyro-ERYGISSMIQSQEK<ub>PDR-COOH	27	AK	VL	Pyrolidone from E (1), Ubiquitination of K (14)		Pyrolidone from E (0: 100.0), Ubiquitination of K (14: 100.0)	Pyrolidone from E (1: 68.15137307434695), Ubiquitination of K (14: 68.15137307434695)	7	15.7858	94.3127
AKT_03	Q12802	Single Protein	EALLAQREEEVQQGQQDLEKER	2	pyro-EALLAQREEEVQQGQQDLEK<ub>ER-COOH	2616	ER	EE	Pyrolidone from E (1), Ubiquitination of K (20)		Pyrolidone from E (0: 100.0), Ubiquitination of K (20: 100.0)	Pyrolidone from E (1: 89.63934426229508), Ubiquitination of K (20: 89.63934426229508)	8	45.1984	94.2857
AKT_03	O75762	Single Protein	EAGQIFQQK	0	pyro-EAGQIFQQK<ub>-COOH	788	CK	RN	Pyrolidone from E (1), Ubiquitination of K (9)		Pyrolidone from E (0: 100.0), Ubiquitination of K (9: 100.0)	Pyrolidone from E (1: 89.37034529451591), Ubiquitination of K (9: 89.37034529451591)	1	14.8532	93.3962
AKT_03	Q9NXB0	Single Protein	QEILKLENSGGK	1	pyro-QEILK<ubq long k>LENSGGK<ubq long k>-COOH	109	YR	KN	Pyrolidone from Q (1), Ubiquitination long of K (12, 5)		Pyrolidone from Q (0: 100.0), Ubiquitination long of K (5: 100.0, 12: 100.0)	Pyrolidone from Q (1: 51.640991292699255), Ubiquitination long of K (5: 51.640991292699255, 12: 51.640991292699255)	8	10.4555	81.9048
AKT_03	O95602	Single Protein	QFPFLASNYEVIMK	0	pyro-QFPFLASNYEVIMK<ub>-COOH	1036	PK	SQ	Pyrolidone from Q (1), Ubiquitination of K (14)		Pyrolidone from Q (0: 100.0), Ubiquitination of K (14: 100.0)	Pyrolidone from Q (1: 95.13657561625583), Ubiquitination of K (14: 95.13657561625583)	1	20.1072	96.279
AKT_03	P23352	Single Protein	KCCSNGCGHTCQVPK	1	NH2-K<ubq long k>CCSNGCGHTCQVPK<ubq long k>-COOH	162	VK	TL	Ubiquitination long of K (1, 15)		Ubiquitination long of K (1: 100.0, 15: 100.0)	Ubiquitination long of K (1: 63.323303243062526, 15: 63.323303243062526)	5	13.1091	91.5094
AKT_03	Q03001	Single Protein	IVAERQQEYK	1	NH2-IVAERQQEYK<ubq long k>-COOH	3637	QK	EK	Ubiquitination long of K (10)		Ubiquitination long of K (10: 100.0)	Ubiquitination long of K (10: 59.39874463164849)	3	9.31767	79.2434
AKT_03	Q8NE71	Single Protein	ICIVGPNGVGK	0	NH2-ICIVGPNGVGK<ubq long k>-COOH	654	SR	ST	Ubiquitination long of K (11)		Ubiquitination long of K (11: 100.0)	Ubiquitination long of K (11: 57.30337078651686)	60	90.0504	99.8905
AKT_03	Q96M86	Single Protein	GLLCALFPSASQVLAEPMTYK	0	NH2-GLLCALFPSASQVLAEPMTYK<ubq long k>-COOH	1930	LR	LM	Ubiquitination long of K (21)		Ubiquitination long of K (21: 100.0)	Ubiquitination long of K (21: 63.323303243062526)	4	9.69992	80.9524
AKT_03	Q9BZV1	Single Protein	KYNYTLLRVR	2	NH2-K<ub>YNYTLLRVR-COOH	333	LR	LP	Ubiquitination of K (1)		Ubiquitination of K (1: 100.0)	Ubiquitination of K (1: 59.39874463164849)	145	100	99.9452
AKT_03	P53396	Single Protein	KPAMPQDSVPSPR	0	NH2-K<ub>PAMPQDSVPSPR-COOH	471	KA	SL	Ubiquitination of K (1)		Ubiquitination of K (1: 100.0)	Ubiquitination of K (1: 87.97319932998326)	1	13.8247	91.5888
AKT_03	O00590	Single Protein	KDAVVSFGK	1	NH2-K<ub>DAVVSFGK<ub>-COOH	38	CR	VF	Ubiquitination of K (1, 9)		Ubiquitination of K (1: 100.0, 9: 100.0)	Ubiquitination of K (1: 85.64753004005341, 9: 85.64753004005341)	1	12.8083	91.4286
AKT_03	Q04637	Single Protein	MNQPPQIAPK	0	NH2-MNQPPQIAPK<ub>-COOH	165	VL	RE	Ubiquitination of K (10)		Ubiquitination of K (10: 100.0)	Ubiquitination of K (10: 77.78144602178936)	1	9.95404	81.2169
AKT_03	Q8NFY4	Single Protein	AVYSRVARICK	2	NH2-AVYSRVARICK<ub>-COOH	250	GK	ND	Ubiquitination of K (11)		Ubiquitination of K (11: 100.0)	Ubiquitination of K (11: 87.97319932998326)	1	13.8247	91.5888
AKT_03	Q92973	Single Protein	GELQNWPDLLPK	0	NH2-GELQNWPDLLPK<ub>-COOH	129	SK	LC	Ubiquitination of K (12)		Ubiquitination of K (12: 100.0)	Ubiquitination of K (12: 75.61461794019934)	3	14.3277	92.4528
AKT_03	P01031	Single Protein	KPLERVFQFLEK	1	NH2-K<ub>PLERVFQFLEK<ub>-COOH	618	AK	SD	Ubiquitination of K (12, 1)		Ubiquitination of K (1: 100.0, 12: 100.0)	Ubiquitination of K (1: 73.97622192866578, 12: 73.97622192866578)	5	16.3238	93.3648
AKT_03	Q14571	Single Protein	QGNHTEAALLKK	1	NH2-QGNHTEAALLK<ub>K<ub>-COOH	80	AK	LQ	Ubiquitination of K (12, 11)		Ubiquitination of K (11: 100.0, 12: 100.0)	Ubiquitination of K (11: 77.78144602178936, 12: 77.78144602178936)	4	21.4886	96.2084
AKT_03	P21817	Single Protein	EEGLEEGLLQMKLPESVK	1	NH2-EEGLEEGLLQMK<ub>LPESVK<ub>-COOH	1919	EK	LQ	Ubiquitination of K (12, 18)		Ubiquitination of K (12: 100.0, 18: 100.0)	Ubiquitination of K (12: 77.9810519438092, 18: 77.9810519438092)	3	13.9902	91.469
AKT_03	Q53SF7	Single Protein	ESCQISQNLDIMK	0	NH2-ESCQISQNLDIMK<ub>-COOH	259	NR	EK	Ubiquitination of K (13)		Ubiquitination of K (13: 100.0)	Ubiquitination of K (13: 81.28792987188132)	1	10.3951	81.9048
AKT_03	Q86VP6	Single Protein	AVAALLTIPEAEK	0	NH2-AVAALLTIPEAEK<ub>-COOH	1179	MR	SP	Ubiquitination of K (13)		Ubiquitination of K (13: 100.0)	Ubiquitination of K (13: 89.37034529451591)	5	26.4161	99.0476
AKT_03	P00338	Single Protein	ADELALVDVIEDKLKGEMMDLQHGSLFLR	2	NH2-ADELALVDVIEDK<ub>LK<ub>GEMMDLQHGSLFLR-COOH	45	DL	TP	Ubiquitination of K (13, 15)		Ubiquitination of K (13: 100.0, 15: 100.0)	Ubiquitination of K (13: 99.9673735725938, 15: 99.9673735725938)	1	26.2014	99.0476
AKT_03	Q8NBE8	Single Protein	IRSLIYNALNPMHK	1	NH2-IRSLIYNALNPMHK<ub>-COOH	252	NK	EI	Ubiquitination of K (14)		Ubiquitination of K (14: 100.0)	Ubiquitination of K (14: 79.26050420168067)	6	24.2869	98.1308
AKT_03	P20929	Single Protein	GIGWIPIGSLEVEK	0	NH2-GIGWIPIGSLEVEK<ub>-COOH	1446	LK	VK	Ubiquitination of K (14)		Ubiquitination of K (14: 100.0)	Ubiquitination of K (14: 89.37034529451591)	2	24.9351	98.0952
AKT_03	Q70CQ1	Single Protein	LRLAQDHSILNPQK	1	NH2-LRLAQDHSILNPQK<ub>-COOH	10	GR	WC	Ubiquitination of K (14)		Ubiquitination of K (14: 100.0)	Ubiquitination of K (14: 95.08582968697408)	1	15.563	94.2857
AKT_03	Q9HBI1	Single Protein	LNVAEVTQSEIGQK	0	NH2-LNVAEVTQSEIGQK<ub>-COOH	133	CK	QK	Ubiquitination of K (14)		Ubiquitination of K (14: 100.0)	Ubiquitination of K (14: 77.9810519438092)	1	10.4576	81.9048
AKT_03	Q9ULP9	Single Protein	LSPFLAARHFNLPSK	1	NH2-LSPFLAARHFNLPSK<ub>-COOH	479	DR	TE	Ubiquitination of K (15)		Ubiquitination of K (15: 100.0)	Ubiquitination of K (15: 99.59322033898304)	4	100	100
AKT_03	Q9HCM1	Single Protein	LGDSLSNPNERAIVK	1	NH2-LGDSLSNPNERAIVK<ub>-COOH	1407	FK	EK	Ubiquitination of K (15)		Ubiquitination of K (15: 100.0)	Ubiquitination of K (15: 84.41775108441774)	1	12.7667	91.4286
AKT_03	Q8NFA0	Single Protein	SIVVDLFHGQLRSQVK	1	NH2-SIVVDLFHGQLRSQVK<ub>-COOH	877	NR	CK	Ubiquitination of K (16)		Ubiquitination of K (16: 100.0)	Ubiquitination of K (16: 75.61461794019934)	10	18.605	96.1905
AKT_03	Q9UID3	Single Protein	LFSERIDVFSPVEFNK	1	NH2-LFSERIDVFSPVEFNK<ub>-COOH	681	QK	VS	Ubiquitination of K (16)		Ubiquitination of K (16: 100.0)	Ubiquitination of K (16: 99.76502181940249)	1	100	100
AKT_03	Q92664	Single Protein	EKRSLASHLSGYIPPK	2	NH2-EK<ub>RSLASHLSGYIPPK<ub>-COOH	317	SR	RK	Ubiquitination of K (16, 2)		Ubiquitination of K (2: 100.0, 16: 100.0)	Ubiquitination of K (2: 82.98157453936348, 16: 82.98157453936348)	2	14.5006	92.5227
AKT_03	Q4V328	Single Protein	AQEVEVLLSENEMLQAK	0	NH2-AQEVEVLLSENEMLQAK<ub>-COOH	65	KK	LH	Ubiquitination of K (17)		Ubiquitination of K (17: 100.0)	Ubiquitination of K (17: 89.37034529451591)	1	14.8532	93.3962
AKT_03	P51884	Single Protein	LHINHNNLTESVGPLPK	0	NH2-LHINHNNLTESVGPLPK<ub>-COOH	121	KK	SL	Ubiquitination of K (17)		Ubiquitination of K (17: 100.0)	Ubiquitination of K (17: 91.3364674278039)	3	28.7866	99.0521
AKT_03	Q6DN90	Single Protein	RSRSLSESYELSSDLQDK	2	NH2-RSRSLSESYELSSDLQDK<ub>-COOH	102	IK	QV	Ubiquitination of K (18)		Ubiquitination of K (18: 100.0)	Ubiquitination of K (18: 87.97319932998326)	2	11.1051	85.7817
AKT_03	Q9HCM7	Single Protein	MPARASPPHSKAAPGDVK	2	NH2-MPARASPPHSK<ub>AAPGDVK<ub>-COOH	839	AK	VK	Ubiquitination of K (18, 11)		Ubiquitination of K (11: 100.0, 18: 100.0)	Ubiquitination of K (11: 73.97622192866578, 18: 73.97622192866578)	1	8.41433	74.8787
AKT_03	O95696	Single Protein	GKPALVRR	1	NH2-GK<ub>PALVRR-COOH	876	GR	HT	Ubiquitination of K (2)		Ubiquitination of K (2: 100.0)	Ubiquitination of K (2: 87.97319932998326)	4	23.9078	98.122
AKT_03	O75179	Single Protein	PDKEIDELIPK	1	NH2-PDK<ub>EIDELIPK<ub>-COOH	1796	KD	NR	Ubiquitination of K (3, 11)		Ubiquitination of K (3: 100.0, 11: 100.0)	Ubiquitination of K (3: 95.0544015825915, 11: 95.0544015825915)	4	27.1279	99.0476
AKT_03	Q5XKR4	Single Protein	LGMKDAAELLGHR	1	NH2-LGMK<ub>DAAELLGHR-COOH	12	AR	EA	Ubiquitination of K (4)		Ubiquitination of K (4: 100.0)	Ubiquitination of K (4: 51.640991292699255)	4	9.38879	79.2434
AKT_03	Q9BYD9	Single Protein	RLVKDIAK	2	NH2-RLVK<ub>DIAK<ub>-COOH	309	DK	VA	Ubiquitination of K (4, 8)		Ubiquitination of K (4: 100.0, 8: 100.0)	Ubiquitination of K (4: 65.90909090909092, 8: 65.90909090909092)	5	17.4946	95.2606
AKT_03	Q9ULG3	Single Protein	INFHKITLR	1	NH2-INFHK<ub>ITLR-COOH	182	KK	LW	Ubiquitination of K (5)		Ubiquitination of K (5: 100.0)	Ubiquitination of K (5: 59.39874463164849)	4	8.80764	77.8327
AKT_03	Q15916	Single Protein	TFTAKSTLQDHLNIHSGDRPYK	1	NH2-TFTAK<ub>STLQDHLNIHSGDRPYK<ub>-COOH	362	LK	CH	Ubiquitination of K (5, 22)		Ubiquitination of K (5: 100.0, 22: 100.0)	Ubiquitination of K (5: 69.50808625336927, 22: 69.50808625336927)	9	14.5999	93.3648
AKT_03	O95980	Single Protein	NDISKVCRK	2	NH2-NDISK<ub>VCRK<ub>-COOH	124	SK	EY	Ubiquitination of K (5, 9)		Ubiquitination of K (5: 100.0, 9: 100.0)	Ubiquitination of K (5: 60.42496679946879, 9: 60.42496679946879)	6	13.1867	91.5858
AKT_03	Q9C0D2	Single Protein	IQNLEKLYLASLRSMGEGHR	2	NH2-IQNLEK<ub>LYLASLRSMGEGHR-COOH	79	QK	QA	Ubiquitination of K (6)		Ubiquitination of K (6: 100.0)	Ubiquitination of K (6: 91.46341463414635)	16	99.0641	99.8905
AKT_03	Q9BXJ9	Single Protein	FLTPLKNLVK	1	NH2-FLTPLK<ub>NLVK<ub>-COOH	660	IK	NK	Ubiquitination of K (6, 10)		Ubiquitination of K (6: 100.0, 10: 100.0)	Ubiquitination of K (6: 53.55029585798816, 10: 53.55029585798816)	10	15.1166	93.4574
AKT_03	Q16552	Single Protein	NTNTNPKR	1	NH2-NTNTNPK<ub>R-COOH	55	NR	SS	Ubiquitination of K (7)		Ubiquitination of K (7: 100.0)	Ubiquitination of K (7: 81.59203980099502)	1	10.6487	84.7619
AKT_03	Q8N122	Single Protein	YFAQPVMKIPEEHDLESQIR	1	NH2-YFAQPVMK<ub>IPEEHDLESQIR-COOH	966	AR	KE	Ubiquitination of K (8)		Ubiquitination of K (8: 100.0)	Ubiquitination of K (8: 54.37086092715232)	5	12.3804	88.6253
AKT_03	Q13823	Single Protein	HLIFVLNK	0	NH2-HLIFVLNK<ub>-COOH	249	WK	CD	Ubiquitination of K (8)		Ubiquitination of K (8: 100.0)	Ubiquitination of K (8: 73.61901573485102)	2	10.0393	81.2169
AKT_03	P48058	Single Protein	LSEAGVLDK	0	NH2-LSEAGVLDK<ub>-COOH	775	LK	LK	Ubiquitination of K (9)		Ubiquitination of K (9: 100.0)	Ubiquitination of K (9: 85.64753004005341)	1	12.8083	91.4286
AKT_03	Q8NCM8	Single Protein	LVYTPLTDK	0	NH2-LVYTPLTDK<ub>-COOH	1662	SK	CY	Ubiquitination of K (9)		Ubiquitination of K (9: 100.0)	Ubiquitination of K (9: 68.42279655400928)	4	19.2213	96.2963
AKT_03	Q96S44	Single Protein	FLSGLELVK	0	NH2-FLSGLELVK<ub>-COOH	32	SR	QG	Ubiquitination of K (9)		Ubiquitination of K (9: 100.0)	Ubiquitination of K (9: 75.44329207092673)	1	8.33307	74.2857
AKT_03	Q6R327	Single Protein	VQKDIFILK	1	NH2-VQK<ub>DIFILK<ub>-COOH	514	LR	DT	Ubiquitination of K (9, 3)		Ubiquitination of K (3: 100.0, 9: 100.0)	Ubiquitination of K (3: 54.37086092715232, 9: 54.37086092715232)	4	10.7884	85.9152
AKT_03	O95294	Single Protein	QDLATKLVK	1	NH2-QDLATK<ub>LVK<ub>-COOH	303	CR	LF	Ubiquitination of K (9, 6)		Ubiquitination of K (6: 100.0, 9: 100.0)	Ubiquitination of K (6: 53.55029585798816, 9: 53.55029585798816)	3	8.33818	74.2857
3	Q6P499	Single Protein	LAGSKDPR	1	NH2-LAGSK<ub>DPR-COOH	61	IR	AY	Ubiquitination of K (5)		Ubiquitination of K (5: 100.0)	Ubiquitination of K (5: 53.60360360360361)	1	4.00826	73.5955
45	A6NLF2	Related Proteins	QRFGEALQEREK	2	NH2-QRFGEALQEREK<longub>-COOH	97; 97; 97	SR; SR; SR	AW; AW; AW	Long ubiquitination (12)		Long ubiquitination (12: 100.0)	Long ubiquitination (12: 55.1219512195122)	1	4.09369	73.2143
100	Q9P2F5	Single Protein	EGCFIIEHK	0	NH2-EGC<cmm>FIIEHK<ub>-COOH	409	PR	GD	Carbamidomethylation of C (3), Ubiquitination of K (9)		Carbamidomethylation of C (3: 100.0), Ubiquitination of K (9: 100.0)	Carbamidomethylation of C (3: 70.83333333333333), Ubiquitination of K (9: 70.83333333333333)	1	5.96456	85.5346
108	Q5XX13	Single Protein	RTSIPLEIQK	1	NH2-RTSIPLEIQK<ub>-COOH	881	VK	LQ	Ubiquitination of K (10)		Ubiquitination of K (10: 100.0)	Ubiquitination of K (10: 87.75510204081633)	1	10.2996	94.4099
119	Q9Y2H6	Single Protein	SVPAALKAPK	1	NH2-SVPAALK<ub>APK<ub>-COOH	1045	PK	IE	Ubiquitination of K (10, 7)		Ubiquitination of K (7: 100.0, 10: 100.0)	Ubiquitination of K (7: 52.76595744680851, 10: 52.76595744680851)	1	3.8818	70.6587
187	Q8IXQ6	Single Protein	NLKNLAEK	1	NH2-NLK<ub>NLAEK<ub>-COOH	741	TK	AK	Ubiquitination of K (8, 3)		Ubiquitination of K (3: 100.0, 8: 100.0)	Ubiquitination of K (3: 77.77777777777779, 8: 77.77777777777779)	1	6.51906	84.4311
243	Q6YFQ2	Single Protein	LDVEAQEPPKGK	1	ace-LDVEAQEPPK<ub>GK<ub>-COOH	2	M	WS	Acetylation of protein N-term (1), Ubiquitination of K (12, 10)		Acetylation of protein N-term (0: 100.0), Ubiquitination of K (10: 100.0, 12: 100.0)	Acetylation of protein N-term (1: 52.76595744680851), Ubiquitination of K (10: 52.76595744680851, 12: 52.76595744680851)	1	3.8818	70.6587
265	P36507	Single Protein	MLTNHTFIK	0	NH2-M<ox>LTNHTFIK<ub>-COOH	362	LK	RS	Oxidation of M (1), Ubiquitination of K (9)		Oxidation of M (1: 100.0), Ubiquitination of K (9: 100.0)	Oxidation of M (1: 53.4412955465587), Ubiquitination of K (9: 53.4412955465587)	1	3.92477	68.2635
311	Q5T4D3	Single Protein	KHYEISLQLDPTASGTK	1	NH2-K<ub>HYEISLQLDPTASGTK<ub>-COOH	707	AK	EN	Ubiquitination of K (1, 17)		Ubiquitination of K (1: 100.0, 17: 100.0)	Ubiquitination of K (1: 53.4412955465587, 17: 53.4412955465587)	1	3.92477	68.2635
313	Q7Z4H8	Single Protein	RNLSDLLEK	1	NH2-RNLSDLLEK<ub>-COOH	418	IK	VK	Ubiquitination of K (9)		Ubiquitination of K (9: 100.0)	Ubiquitination of K (9: 47.161572052401745)	1	4.05239	72.561
362	P26373	Single Protein	CPTVRYHTK	1	NH2-C<cmm>PTVRYHTK<ub>-COOH	61	VR	VR	Carbamidomethylation of C (1), Ubiquitination of K (9)		Carbamidomethylation of C (1: 100.0), Ubiquitination of K (9: 100.0)	Carbamidomethylation of C (1: 48.728813559322035), Ubiquitination of K (9: 48.728813559322035)	1	4.33656	79.0419
389	Q9NR48	Single Protein	ESILEKFSVR	1	NH2-ESILEK<ub>FSVR-COOH	475	NK	KE	Ubiquitination of K (6)		Ubiquitination of K (6: 100.0)	Ubiquitination of K (6: 85.64593301435407)	1	8.92625	90.7407
397	Q9Y6N7	Single Protein	NSVVIPDLRK	1	NH2-NSVVIPDLRK<ub>-COOH	734	AK	GV	Ubiquitination of K (10)		Ubiquitination of K (10: 100.0)	Ubiquitination of K (10: 81.77339901477832)	1	7.63428	87.8049
408	Q01538	Single Protein	SLSGCPRATFAGK	1	NH2-SLSGCPRATFAGK<ub>-COOH	966	HR	KG	Ubiquitination of K (13)		Ubiquitination of K (13: 100.0)	Ubiquitination of K (13: 42.35807860262008)	1	3.95129	71.4286
411	P42892	Single Protein	FMEVMYGTK	0	NH2-FM<ox>EVMYGTK<ub>-COOH	417	EK	KT	Oxidation of M (2), Ubiquitination of K (9)		Oxidation of M (2: 50.0, 5: 50.0), Ubiquitination of K (9: 100.0)	Oxidation of M (2: 52.76595744680851), Ubiquitination of K (9: 52.76595744680851)	1	3.8818	70.6587
417	Q99435	Single Protein	SALAYVDGK	0	NH2-SALAYVDGK<ub>-COOH	317	LK	CC	Ubiquitination of K (9)		Ubiquitination of K (9: 100.0)	Ubiquitination of K (9: 52.76595744680851)	1	3.8818	70.6587
425	Q9ULL1	Single Protein	SEPSSRSHK	1	NH2-SEPSSRSHK<ub>-COOH	469	RK	VL	Ubiquitination of K (9)		Ubiquitination of K (9: 100.0)	Ubiquitination of K (9: 71.36363636363636)	1	6.09084	85.4839
429	Q13029	Single Protein	FNIKSRER	2	NH2-FNIK<ub>SRER-COOH	1637	DR	SG	Ubiquitination of K (4)		Ubiquitination of K (4: 100.0)	Ubiquitination of K (4: 52.76595744680851)	1	3.8818	70.6587
435	Q9P2D3	Single Protein	ELAHSLLLNEEALAQITEAK	0	ace-ELAHSLLLNEEALAQITEAK<ub>-COOH	2	M	RP	Acetylation of protein N-term (1), Ubiquitination of K (20)		Acetylation of protein N-term (0: 100.0), Ubiquitination of K (20: 100.0)	Acetylation of protein N-term (1: 82.5), Ubiquitination of K (20: 82.5)	1	7.69008	86.747
465	P63244	Single Protein	TPQFPDMILSASRDK	1	NH2-TPQFPDM<ox>ILSASRDK<ub>-COOH	24	AT	TI	Oxidation of M (7), Ubiquitination of K (15)		Oxidation of M (7: 100.0), Ubiquitination of K (15: 100.0)	Oxidation of M (7: 64.76683937823834), Ubiquitination of K (15: 64.76683937823834)	1	5.17416	82.6347
542	Q96C34	Single Protein	QSLLTAIHMVLTEHDPFK	0	pyro-QSLLTAIHM<ox>VLTEHDPFK<ub>-COOH	514	PK	RS	Oxidation of M (9), Pyrolidone from Q (1), Ubiquitination of K (18)		Oxidation of M (9: 100.0), Pyrolidone from Q (0: 100.0), Ubiquitination of K (18: 100.0)	Oxidation of M (9: 83.16831683168317), Pyrolidone from Q (1: 83.16831683168317), Ubiquitination of K (18: 83.16831683168317)	1	6.90196	85.119
567	Q8NGF8	Single Protein	FIIDLLAK	0	NH2-FIIDLLAK<ub>-COOH	79	PK	IK	Ubiquitination of K (8)		Ubiquitination of K (8: 100.0)	Ubiquitination of K (8: 64.76683937823834)	1	5.17416	82.6347
616	Q8N565	Single Protein	WKCILEDLGFQK	1	NH2-WK<ub>C<cmm>ILEDLGFQK<ub>-COOH	108	NR	EA	Carbamidomethylation of C (3), Ubiquitination of K (12, 2)		Carbamidomethylation of C (3: 100.0), Ubiquitination of K (2: 100.0, 12: 100.0)	Carbamidomethylation of C (3: 47.161572052401745), Ubiquitination of K (2: 47.161572052401745, 12: 47.161572052401745)	1	4.05239	72.561
635	Q8NHP7	Single Protein	EKAAREYR	2	NH2-EK<ub>AAREYR-COOH	316	RR	VN	Ubiquitination of K (2)		Ubiquitination of K (2: 100.0)	Ubiquitination of K (2: 42.35807860262008)	1	3.95129	71.4286
655	Q7Z4J2	Single Protein	EYLNGVIHDIK	0	NH2-EYLNGVIHDIK<ub>-COOH	245	IK	NG	Ubiquitination of K (11)		Ubiquitination of K (11: 100.0)	Ubiquitination of K (11: 64.76683937823834)	1	5.17416	82.6347
681	Q86V48	Single Protein	KISSELEMLR	1	NH2-K<longub>ISSELEMLR-COOH	150	TK	VK	Long ubiquitination (1)		Long ubiquitination (1: 100.0)	Long ubiquitination (1: 79.39698492462311)	1	6.66177	85.1648
693	P04090	Related Proteins	ELVRAQIAICGMSTWSK	1	NH2-ELVRAQIAICGM<ox>STWSK<ub>-COOH	38; 38	GR; GR	RS; RS	Oxidation of M (12), Ubiquitination of K (17)		Oxidation of M (12: 100.0), Ubiquitination of K (17: 100.0)	Oxidation of M (12: 52.76595744680851), Ubiquitination of K (17: 52.76595744680851)	1	3.8818	70.6587
704	Q13573	Single Protein	PMEPPRFKINK	2	NH2-PMEPPRFK<ub>INK<ub>-COOH	206	KD	KI	Ubiquitination of K (8, 11)		Ubiquitination of K (8: 100.0, 11: 100.0)	Ubiquitination of K (8: 55.1219512195122, 11: 55.1219512195122)	1	4.09369	73.2143
707	Q9H1E1	Single Protein	GMTSSQWFK	0	NH2-GMTSSQWFK<ub>-COOH	32	PK	IQ	Ubiquitination of K (9)		Ubiquitination of K (9: 100.0)	Ubiquitination of K (9: 53.60360360360361)	1	4.00826	73.5955
757	Q9H871	Single Protein	EMLIAQNSSLEFK	0	NH2-EM<ox>LIAQNSSLEFK<ub>-COOH	181	NR	LH	Oxidation of M (2), Ubiquitination of K (13)		Oxidation of M (2: 100.0), Ubiquitination of K (13: 100.0)	Oxidation of M (2: 42.35807860262008), Ubiquitination of K (13: 42.35807860262008)	1	3.95129	71.4286
760	Q5JTB6	Single Protein	RLDVMEEMVEK	1	NH2-RLDVMEEMVEK<longub>-COOH	48	QR	TV	Long ubiquitination (11)		Long ubiquitination (11: 100.0)	Long ubiquitination (11: 82.85714285714285)	1	7.83904	86.9822
785	Q8NEF3	Single Protein	CASQLKEEEEK	1	NH2-CASQLK<ub>EEEEK<ub>-COOH	290	MK	EK	Ubiquitination of K (6, 11)		Ubiquitination of K (6: 100.0, 11: 100.0)	Ubiquitination of K (6: 42.35807860262008, 11: 42.35807860262008)	1	3.95129	71.4286
815	Q96AY3	Single Protein	LMPGQDPEK	0	NH2-LM<ox>PGQDPEK<ub>-COOH	537	GR	TI	Oxidation of M (2), Ubiquitination of K (9)		Oxidation of M (2: 100.0), Ubiquitination of K (9: 100.0)	Oxidation of M (2: 51.082251082251084), Ubiquitination of K (9: 51.082251082251084)	1	3.85351	71.4286
822	Q9ULE4	Single Protein	LRVENQQLSK	1	NH2-LRVENQQLSK<ub>-COOH	203	QR	DY	Ubiquitination of K (10)		Ubiquitination of K (10: 100.0)	Ubiquitination of K (10: 53.21100917431192)	1	3.916	69.1429
839	Q7Z333	Single Protein	FRQCPEPTSTAEK	1	NH2-FRQC<cmm>PEPTSTAEK<ub>-COOH	1274	KK	LG	Carbamidomethylation of C (4), Ubiquitination of K (13)		Carbamidomethylation of C (4: 100.0), Ubiquitination of K (13: 100.0)	Carbamidomethylation of C (4: 99.47916666666666), Ubiquitination of K (13: 99.47916666666666)	1	21.5229	98.8701
869	Q68EM7	Single Protein	ESFGVKLMDFQAHR	1	pyro-ESFGVK<longub>LM<ox>DFQAHR-COOH	496	KK	RG	Long ubiquitination (6), Oxidation of M (8), Pyrolidone from E (1)		Long ubiquitination (6: 100.0), Oxidation of M (8: 100.0), Pyrolidone from E (0: 100.0)	Long ubiquitination (6: 77.77777777777779), Oxidation of M (8: 77.77777777777779), Pyrolidone from E (1: 77.77777777777779)	1	6.51906	84.4311
964	O95696	Single Protein	GKPALVRR	1	NH2-GK<ub>PALVRR-COOH	876	GR	HT	Ubiquitination of K (2)		Ubiquitination of K (2: 100.0)	Ubiquitination of K (2: 87.75510204081633)	1	10.2996	94.4099
968	Q5H9U9	Single Protein	NGMRMGQLLKCLK	2	NH2-NGMRMGQLLK<ub>CLK<ub>-COOH	1642	QK	DF	Ubiquitination of K (13, 10)		Ubiquitination of K (10: 100.0, 13: 100.0)	Ubiquitination of K (10: 55.1219512195122, 13: 55.1219512195122)	1	4.09369	73.2143
976	Q92616	Single Protein	NILMSKVKPPK	1	NH2-NILMSK<ub>VK<ub>PPK<ub>-COOH	230	MK	YL	Ubiquitination of K (8, 6, 11)		Ubiquitination of K (6: 100.0, 8: 100.0, 11: 100.0)	Ubiquitination of K (6: 52.76595744680851, 8: 52.76595744680851, 11: 52.76595744680851)	1	3.8818	70.6587
984	P30041	Single Protein	LFPKGVFTK	1	NH2-LFPK<ub>GVFTK<ub>-COOH	201	KK	EL	Ubiquitination of K (4, 9)		Ubiquitination of K (4: 100.0, 9: 100.0)	Ubiquitination of K (4: 51.082251082251084, 9: 51.082251082251084)	1	3.85351	71.4286
1010	Q86X45	Single Protein	SQTTGHLVICMPK	0	NH2-SQTTGHLVICMPK<ub>-COOH	368	KR	VG	Ubiquitination of K (13)		Ubiquitination of K (13: 100.0)	Ubiquitination of K (13: 91.21951219512195)	1	10.4977	95.625
1038	Q8WZ42	Single Protein	KPEVPPTK	0	NH2-K<ub>PEVPPTK<ub>-COOH	11472, 11556	PK, PK	VP, VP	Ubiquitination of K (8, 1)		Ubiquitination of K (1: 100.0, 8: 100.0)	Ubiquitination of K (1: 97.07317073170731, 8: 97.07317073170731)	1	14.8855	98.8827
1040	P04114	Single Protein	SVSDGIAALDLNAVANK	0	NH2-SVSDGIAALDLNAVANK<ub>-COOH	3830	PK	IA	Ubiquitination of K (17)		Ubiquitination of K (17: 100.0)	Ubiquitination of K (17: 53.21100917431192)	1	3.916	69.1429
1052	P52888	Single Protein	MKPPAACAGDMADA	0	ace-MK<ub>PPAACAGDMADA-COOH	1		AS	Acetylation of protein N-term (1), Ubiquitination of K (2)		Acetylation of protein N-term (0: 100.0), Ubiquitination of K (2: 100.0)	Acetylation of protein N-term (1: 55.1219512195122), Ubiquitination of K (2: 55.1219512195122)	1	4.09369	73.2143
1064	Q9NQV7	Single Protein	ITEDEEAANNGYSWLITK	0	NH2-ITEDEEAANNGYSWLITK<longub>-COOH	280	GR	GR	Long ubiquitination (18)		Long ubiquitination (18: 100.0)	Long ubiquitination (18: 88.0)	1	7.17855	85.8896
1066	Q8N2E2	Single Protein	ECVAPNICKCKPGYIGSNCQTALCD	1	pyro-EC<cmm>VAPNICK<ub>CK<ub>PGYIGSNCQTALCD-COOH	1307	SR	PD	Carbamidomethylation of C (2), Pyrolidone from E (1), Ubiquitination of K (9, 11)		Carbamidomethylation of C (2: 49.9804072073246, 8: 49.9804072073246, 10: 3.8534743276595146E-5, 19: 3.8534743276595146E-5, 24: 0.03910851586424719), Pyrolidone from E (0: 100.0), Ubiquitination of K (9: 100.0, 11: 100.0)	Carbamidomethylation of C (24: 92.72727272727272), Pyrolidone from E (1: 92.72727272727272), Ubiquitination of K (9: 92.72727272727272, 11: 92.72727272727272)	1	13.6173	98.125
1077	Q9Y2I9	Single Protein	VSLAIWAK	0	NH2-VSLAIWAK<ub>-COOH	464	LR	LG	Ubiquitination of K (8)		Ubiquitination of K (8: 100.0)	Ubiquitination of K (8: 42.35807860262008)	1	3.95129	71.4286
1122	Q6NXT1	Single Protein	AARPHRRLGPTGK	2	NH2-AARPHRRLGPTGK<ub>-COOH	94	RR	EV	Ubiquitination of K (13)		Ubiquitination of K (13: 100.0)	Ubiquitination of K (13: 47.161572052401745)	1	4.05239	72.561
1201	Q96C10	Single Protein	LMDQIHDHLEMPELSRK	1	NH2-LM<ox>DQIHDHLEMPELSRK<ub>-COOH	236	KK	FG	Oxidation of M (2), Ubiquitination of K (17)		Oxidation of M (2: 50.0, 11: 50.0), Ubiquitination of K (17: 100.0)	Oxidation of M (2: 97.96954314720813), Ubiquitination of K (17: 97.96954314720813)	1	16.902	99.3902
1205	O60716	Single Protein	DEWFSRGK	1	NH2-DEWFSRGK<ub>-COOH	626	GK	KP	Ubiquitination of K (8)		Ubiquitination of K (8: 100.0)	Ubiquitination of K (8: 49.76525821596244)	1	3.92948	70.3488
1223	A1L0T0	Single Protein	EMVPAKPPK	0	pyro-EMVPAK<ub>PPK<ub>-COOH	222	QK	GL	Pyrolidone from E (1), Ubiquitination of K (9, 6)		Pyrolidone from E (0: 100.0), Ubiquitination of K (6: 100.0, 9: 100.0)	Pyrolidone from E (1: 44.104803493449786), Ubiquitination of K (6: 44.104803493449786, 9: 44.104803493449786)	1	4.23102	77.6471
1246	A0A0A6YYL3	Related Proteins	SQEPEINK	0	NH2-SQEPEINK<ub>-COOH	365; 402; 402, 520; 402; 402; 365; 402, 520; 365, 483; 439; 402; 520; 402	KM; KM; KM, KR; EM; KM; KM; KM, KR; KM, KR; EM; EM; KR; KM	DC; DC; DG, DG; GG; DC; DC; DG, DG; DG, DG; GG; GG; DG; DC	Ubiquitination of K (8)		Ubiquitination of K (8: 100.0)	Ubiquitination of K (8: 88.78504672897196)	1	11.1697	97.6331
1254	Q8WZ42	Single Protein	KPEAPPPKVPEAPKEVVPEK	2	NH2-K<ub>PEAPPPK<ub>VPEAPK<ub>EVVPEK<ub>-COOH	11444	AK	KV	Ubiquitination of K (8, 1, 20, 14)		Ubiquitination of K (1: 100.0, 8: 100.0, 14: 100.0, 20: 100.0)	Ubiquitination of K (1: 85.64593301435407, 8: 85.64593301435407, 14: 85.64593301435407, 20: 85.64593301435407)	1	7.87106	86.9822
1286	Q86XE0	Single Protein	NRKELLGGFLR	2	NH2-NRK<ub>ELLGGFLR-COOH	173	GK	NI	Ubiquitination of K (3)		Ubiquitination of K (3: 100.0)	Ubiquitination of K (3: 79.39698492462311)	1	6.70776	85.2071
1295	Q1L6U9	Single Protein	QEAGTCQFSLVQKSD	1	pyro-QEAGTC<cmm>QFSLVQK<ub>SD-COOH	95	VR	PR	Carbamidomethylation of C (6), Pyrolidone from Q (1), Ubiquitination of K (13)		Carbamidomethylation of C (6: 100.0), Pyrolidone from Q (0: 100.0), Ubiquitination of K (13: 100.0)	Carbamidomethylation of C (6: 70.83333333333333), Pyrolidone from Q (1: 70.83333333333333), Ubiquitination of K (13: 70.83333333333333)	1	5.96456	85.5346
1309	Q6ZRK6	Single Protein	QQIQANTEMEAELK	0	pyro-QQIQANTEMEAELK<ub>-COOH	293	LR	VL	Pyrolidone from Q (1), Ubiquitination of K (14)		Pyrolidone from Q (0: 100.0), Ubiquitination of K (14: 100.0)	Pyrolidone from Q (1: 71.36363636363636), Ubiquitination of K (14: 71.36363636363636)	1	6.09084	85.4839
1324	Q14814	Single Protein	KPDLRVITSQAGK	1	NH2-K<ub>PDLRVITSQAGK<ub>-COOH	267	SR	GL	Ubiquitination of K (1, 13)		Ubiquitination of K (1: 100.0, 13: 100.0)	Ubiquitination of K (1: 71.36363636363636, 13: 71.36363636363636)	1	6.09084	85.4839
1330	Q96A00	Single Protein	AAQRLGKR	2	ace-AAQRLGK<ub>R-COOH	2	M	VL	Acetylation of protein N-term (1), Ubiquitination of K (7)		Acetylation of protein N-term (0: 100.0), Ubiquitination of K (7: 100.0)	Acetylation of protein N-term (1: 89.16256157635468), Ubiquitination of K (7: 89.16256157635468)	1	10.2706	94.8276
1342	P09661	Single Protein	KGGPSPGDVEAIK	1	NH2-K<ub>GGPSPGDVEAIK<ub>-COOH	193	KK	NA	Ubiquitination of K (1, 13)		Ubiquitination of K (1: 100.0, 13: 100.0)	Ubiquitination of K (1: 88.61386138613861, 13: 88.61386138613861)	1	10.4742	93.7888
1359	Q68CZ2	Single Protein	ICIVIEPAQLLK	0	NH2-IC<cmm>IVIEPAQLLK<ub>-COOH	226	SR	GD	Carbamidomethylation of C (2), Ubiquitination of K (12)		Carbamidomethylation of C (2: 100.0), Ubiquitination of K (12: 100.0)	Carbamidomethylation of C (2: 70.83333333333333), Ubiquitination of K (12: 70.83333333333333)	1	4.34924	80
1360	Q96L93	Single Protein	SKTTITNLK	1	NH2-SK<ub>TTITNLK<ub>-COOH	31	EK	IP	Ubiquitination of K (9, 2)		Ubiquitination of K (2: 100.0, 9: 100.0)	Ubiquitination of K (2: 48.728813559322035, 9: 48.728813559322035)	1	4.33656	79.0419
1417	Q00056	Single Protein	EPVVYPWMK	0	pyro-EPVVYPWMK<ub>-COOH	191	GK	KI	Pyrolidone from E (1), Ubiquitination of K (9)		Pyrolidone from E (0: 100.0), Ubiquitination of K (9: 100.0)	Pyrolidone from E (1: 52.76595744680851), Ubiquitination of K (9: 52.76595744680851)	1	3.8818	70.6587
1497	Q86WA6	Single Protein	KLFTVVAWDPR	1	NH2-K<longub>LFTVVAWDPR-COOH	87	NK	GY	Long ubiquitination (1)		Long ubiquitination (1: 100.0)	Long ubiquitination (1: 88.0)	1	10.5632	97.5904
1505	Q9BW04	Single Protein	AKETVSTRYTQPQPPPAGLPQNAR	2	NH2-AK<longub>ETVSTRYTQPQPPPAGLPQNAR-COOH	251	QK	AE	Long ubiquitination (2)		Long ubiquitination (2: 100.0)	Long ubiquitination (2: 83.16831683168317)	2	13.5637	98.1423
1544	Q9GZY0	Single Protein	PYLKGELLR	1	NH2-PYLK<ub>GELLR-COOH	453	KD	RT	Ubiquitination of K (4)		Ubiquitination of K (4: 100.0)	Ubiquitination of K (4: 47.161572052401745)	1	4.05239	72.561
1592	P35498	Single Protein	VSYQPITTTLK	0	NH2-VSYQPITTTLK<ub>-COOH	1901	SK	RK	Ubiquitination of K (11)		Ubiquitination of K (11: 100.0)	Ubiquitination of K (11: 71.36363636363636)	1	5.14105	82.6347
1596	Q6QEF8	Single Protein	HVFGQAAK	0	NH2-HVFGQAAK<ub>-COOH	13	FR	AD	Ubiquitination of K (8)		Ubiquitination of K (8: 100.0)	Ubiquitination of K (8: 98.05825242718447)	1	18.8081	98.8764
1627	Q9NQS7	Single Protein	RNTPLRMDPK	2	NH2-RNTPLRM<ox>DPK<longub>-COOH	522	IK	CS	Long ubiquitination (10), Oxidation of M (7)		Long ubiquitination (10: 100.0), Oxidation of M (7: 100.0)	Long ubiquitination (10: 81.77339901477832), Oxidation of M (7: 81.77339901477832)	1	7.63428	87.8049
1645	Q709C8	Single Protein	FLGDYVENLNK	0	NH2-FLGDYVENLNK<ub>-COOH	14	NR	SQ	Ubiquitination of K (11)		Ubiquitination of K (11: 100.0)	Ubiquitination of K (11: 53.60360360360361)	1	4.00826	73.5955
1647	Q6ZRI8	Single Protein	GCIPFLKAAR	1	NH2-GCIPFLK<longub>AAR-COOH	3	MG	AL	Long ubiquitination (7)		Long ubiquitination (7: 100.0)	Long ubiquitination (7: 71.36363636363636)	1	5.14105	82.6347
1671	Q9UHB9	Single Protein	ETFCLDPSLVTK	0	pyro-ETFCLDPSLVTK<ub>-COOH	559	RF	QA	Pyrolidone from E (1), Ubiquitination of K (12)		Pyrolidone from E (0: 100.0), Ubiquitination of K (12: 100.0)	Pyrolidone from E (1: 52.76595744680851), Ubiquitination of K (12: 52.76595744680851)	1	3.8818	70.6587
1672	Q16206	Single Protein	QEMTGVGASLEK	0	pyro-QEM<ox>TGVGASLEK<ub>-COOH	586	FK	RW	Oxidation of M (3), Pyrolidone from Q (1), Ubiquitination of K (12)		Oxidation of M (3: 100.0), Pyrolidone from Q (0: 100.0), Ubiquitination of K (12: 100.0)	Oxidation of M (3: 52.76595744680851), Pyrolidone from Q (1: 52.76595744680851), Ubiquitination of K (12: 52.76595744680851)	1	3.8818	70.6587
1675	Q5JSH3	Single Protein	NTFEETELELKK	1	NH2-NTFEETELELK<ub>K<ub>-COOH	128	SQ	CF	Ubiquitination of K (12, 11)		Ubiquitination of K (11: 100.0, 12: 100.0)	Ubiquitination of K (11: 47.161572052401745, 12: 47.161572052401745)	1	4.05239	72.561
1687	O15315	Single Protein	LSRHQILTCQDFLCLSPLELMK	1	NH2-LSRHQILTCQDFLCLSPLELM<ox>K<ub>-COOH	19	DR	VT	Oxidation of M (21), Ubiquitination of K (22)		Oxidation of M (21: 100.0), Ubiquitination of K (22: 100.0)	Oxidation of M (21: 86.25), Ubiquitination of K (22: 86.25)	1	8.45098	89.697
1691	Q6ZVD8	Single Protein	QNSVNSGMLLPMSK	0	pyro-QNSVNSGM<ox>LLPM<ox>SK<ub>-COOH	1208	RR	DR	Oxidation of M (8, 12), Pyrolidone from Q (1), Ubiquitination of K (14)		Oxidation of M (8: 100.0, 12: 100.0), Pyrolidone from Q (0: 100.0), Ubiquitination of K (14: 100.0)	Oxidation of M (8: 53.21100917431192, 12: 53.21100917431192), Pyrolidone from Q (1: 53.21100917431192), Ubiquitination of K (14: 53.21100917431192)	1	3.916	69.1429
1693	Q96M93	Single Protein	QRVDDALTSK	1	pyro-QRVDDALTSK<ub>-COOH	433	IK	LP	Pyrolidone from Q (1), Ubiquitination of K (10)		Pyrolidone from Q (0: 100.0), Ubiquitination of K (10: 100.0)	Pyrolidone from Q (1: 53.60360360360361), Ubiquitination of K (10: 53.60360360360361)	1	4.00826	73.5955
1731	O94956	Single Protein	IGPAGEVPQVPDK	0	NH2-IGPAGEVPQVPDK<ub>-COOH	5	PR	ET	Ubiquitination of K (13)		Ubiquitination of K (13: 100.0)	Ubiquitination of K (13: 79.39698492462311)	1	6.70776	85.2071
1794	O15015	Single Protein	KYPNLMALR	1	NH2-K<ub>YPNLM<ox>ALR-COOH	500	PR	NH	Oxidation of M (6), Ubiquitination of K (1)		Oxidation of M (6: 100.0), Ubiquitination of K (1: 100.0)	Oxidation of M (6: 77.77777777777779), Ubiquitination of K (1: 77.77777777777779)	1	6.51906	84.4311
1823	Q9UMD9	Single Protein	EKQAAYNADSGLK	1	pyro-EK<ub>QAAYNADSGLK<ub>-COOH	391	KK	AE	Pyrolidone from E (1), Ubiquitination of K (13, 2)		Pyrolidone from E (0: 100.0), Ubiquitination of K (2: 100.0, 13: 100.0)	Pyrolidone from E (1: 48.728813559322035), Ubiquitination of K (2: 48.728813559322035, 13: 48.728813559322035)	1	4.33656	79.0419
1887	P25791	Single Protein	DYLRLFGQDGLCASCDK	1	NH2-DYLRLFGQDGLCASCDK<ub>-COOH	83	RR	RI	Ubiquitination of K (17)		Ubiquitination of K (17: 100.0)	Ubiquitination of K (17: 42.35807860262008)	1	3.95129	71.4286
1911	Q8IXQ8	Single Protein	ERGVSNKVK	2	pyro-ERGVSNK<ub>VK<ub>-COOH	11	KK	TS	Pyrolidone from E (1), Ubiquitination of K (9, 7)		Pyrolidone from E (0: 100.0), Ubiquitination of K (7: 100.0, 9: 100.0)	Pyrolidone from E (1: 49.76525821596244), Ubiquitination of K (7: 49.76525821596244, 9: 49.76525821596244)	1	3.92948	70.3488
1944	Q9UGL1	Single Protein	EKPKSRSK	2	NH2-EK<ub>PK<ub>SRSK<ub>-COOH	294	EK	KA	Ubiquitination of K (4, 8, 2)		Ubiquitination of K (2: 100.0, 4: 100.0, 8: 100.0)	Ubiquitination of K (2: 42.35807860262008, 4: 42.35807860262008, 8: 42.35807860262008)	1	3.95129	71.4286
1987	Q13505	Single Protein	QGRAEAHK	1	pyro-QGRAEAHK<ub>-COOH	132	PR	EV	Pyrolidone from Q (1), Ubiquitination of K (8)		Pyrolidone from Q (0: 100.0), Ubiquitination of K (8: 100.0)	Pyrolidone from Q (1: 51.082251082251084), Ubiquitination of K (8: 51.082251082251084)	1	3.85351	71.4286
1998	P14625	Single Protein	LNVSRETLQQHKLLK	2	NH2-LNVSRETLQQHK<ub>LLK<ub>-COOH	444	LP	VI	Ubiquitination of K (12, 15)		Ubiquitination of K (12: 100.0, 15: 100.0)	Ubiquitination of K (12: 88.0, 15: 88.0)	1	9.88262	91.2791
2025	G9CGD6	Related Proteins	MEPVTKWSPK	1	NH2-M<ox>EPVTK<ub>WSPK<ub>-COOH	1; 1		QV; QV	Oxidation of M (1), Ubiquitination of K (6, 10)		Oxidation of M (1: 100.0), Ubiquitination of K (6: 100.0, 10: 100.0)	Oxidation of M (1: 80.61224489795919), Ubiquitination of K (6: 80.61224489795919, 10: 80.61224489795919)	1	6.61646	84.3373
2088	P0CJ78	Single Protein	AAHAPPAAAAEAPK	0	NH2-AAHAPPAAAAEAPK<ub>-COOH	461	HK	DG	Ubiquitination of K (14)		Ubiquitination of K (14: 100.0)	Ubiquitination of K (14: 97.67441860465115)	1	15.9384	98.773
2098	Q96IF1	Single Protein	ERLGEKASR	2	NH2-ERLGEK<longub>ASR-COOH	2	M	LL	Long ubiquitination (6)		Long ubiquitination (6: 100.0)	Long ubiquitination (6: 46.58119658119658)	3	5.90549	84.0464
2166	P61289	Single Protein	VDQEVKLK	1	NH2-VDQEVK<ub>LK<ub>-COOH	7	LK	VD	Ubiquitination of K (8, 6)		Ubiquitination of K (6: 100.0, 8: 100.0)	Ubiquitination of K (6: 80.61224489795919, 8: 80.61224489795919)	1	6.61646	84.3373
2190	Q9C0B0	Single Protein	TGICIHETDSK	0	NH2-TGIC<cmm>IHETDSK<ub>-COOH	127	YK	GN	Carbamidomethylation of C (4), Ubiquitination of K (11)		Carbamidomethylation of C (4: 100.0), Ubiquitination of K (11: 100.0)	Carbamidomethylation of C (4: 82.5), Ubiquitination of K (11: 82.5)	1	7.60422	86.7052
2199	Q86SJ6	Single Protein	RNPIAKIR	2	NH2-RNPIAK<ub>IR-COOH	67	SK	SD	Ubiquitination of K (6)		Ubiquitination of K (6: 100.0)	Ubiquitination of K (6: 48.728813559322035)	1	4.33656	79.0419
2202	Q15506	Single Protein	MKTNSLQNEEK	1	NH2-MK<longub>TNSLQNEEK<longub>-COOH	137	KK	EE	Long ubiquitination (2, 11)		Long ubiquitination (2: 100.0, 11: 100.0)	Long ubiquitination (2: 80.61224489795919, 11: 80.61224489795919)	1	6.69007	84.7561
2213	Q01995	Single Protein	LGFQVWLKNGVILSK	1	NH2-LGFQVWLK<ub>NGVILSK<ub>-COOH	50	GR	LV	Ubiquitination of K (8, 15)		Ubiquitination of K (8: 100.0, 15: 100.0)	Ubiquitination of K (8: 53.4412955465587, 15: 53.4412955465587)	1	3.92477	68.2635
2221	Q9H4K1	Single Protein	MRQNDKIMCILENR	2	ace-MRQNDK<ub>IM<ox>CILENR-COOH	1		KK	Acetylation of protein N-term (1), Oxidation of M (8), Ubiquitination of K (6)		Acetylation of protein N-term (0: 100.0), Oxidation of M (1: 1.0549613567337096E-4, 8: 99.99989450386433), Ubiquitination of K (6: 100.0)	Acetylation of protein N-term (1: 83.16831683168317), Oxidation of M (8: 83.16831683168317), Ubiquitination of K (6: 83.16831683168317)	1	7.92975	86.9822
2235	Q92629	Single Protein	SARNVTVNILNDQTK	1	NH2-SARNVTVNILNDQTK<ub>-COOH	105	FK	VL	Ubiquitination of K (15)		Ubiquitination of K (15: 100.0)	Ubiquitination of K (15: 64.76683937823834)	1	4.02488	74.1758
2243	Q13698	Single Protein	GEGIPTTAK	0	NH2-GEGIPTTAK<ub>-COOH	711	PK	LK	Ubiquitination of K (9)		Ubiquitination of K (9: 100.0)	Ubiquitination of K (9: 89.26829268292683)	1	10	91.7127
2258	Q8N163	Single Protein	QRAGGEPWGAK	1	NH2-QRAGGEPWGAK<ub>-COOH	205	RK	KP	Ubiquitination of K (11)		Ubiquitination of K (11: 100.0)	Ubiquitination of K (11: 70.83333333333333)	1	5.96456	85.5346
2295	Q92186	Single Protein	HNIQPASSK	0	NH2-HNIQPASSK<ub>-COOH	77	IK	WR	Ubiquitination of K (9)		Ubiquitination of K (9: 100.0)	Ubiquitination of K (9: 53.21100917431192)	1	3.916	69.1429
2339	Q96BD0	Single Protein	SAAHSPLDTSKQPLCQLWAEK	1	NH2-SAAHSPLDTSK<ub>QPLCQLWAEK<ub>-COOH	46	LR	HG	Ubiquitination of K (21, 11)		Ubiquitination of K (11: 100.0, 21: 100.0)	Ubiquitination of K (11: 80.61224489795919, 21: 80.61224489795919)	1	6.69007	84.7561
2385	Q8TF44	Single Protein	RDTLLGEK	1	NH2-RDTLLGEK<ub>-COOH	403	LK	EL	Ubiquitination of K (8)		Ubiquitination of K (8: 100.0)	Ubiquitination of K (8: 53.97489539748954)	1	3.96514	71.875
2397	Q9NXL9	Single Protein	FDLILVLLDTK	0	NH2-FDLILVLLDTK<ub>-COOH	483	SR	NE	Ubiquitination of K (11)		Ubiquitination of K (11: 100.0)	Ubiquitination of K (11: 88.78504672897196)	1	11.1697	97.6331
2403	P0CG47	Related and Unrelated Proteins	LIFAGKQLEDGR	1	NH2-LIFAGK<ub>QLEDGR-COOH	43, 119, 195; 43, 119, 195, 271, 347, 423, 499, 575, 651; 43; 43	QR, QR, QR; QR, QR, QR, QR, QR, QR, QR, QR, QR; QR; QR	TL, TL, TL; TL, TL, TL, TL, TL, TL, TL, TL, TL; TL; TL	Ubiquitination of K (6)		Ubiquitination of K (6: 100.0)	Ubiquitination of K (6: 100.0)	1	100	100
2423	Q96RI9	Single Protein	IESTASQAQSSSESYK	0	NH2-IESTASQAQSSSESYK<longub>-COOH	231	RK	ER	Long ubiquitination (16)		Long ubiquitination (16: 100.0)	Long ubiquitination (16: 96.11650485436894)	1	14.1218	98.8506
2432	O95622	Single Protein	EHSIETFLILRCTQKR	2	NH2-EHSIETFLILRCTQK<ub>R-COOH	634	LK	KE	Ubiquitination of K (15)		Ubiquitination of K (15: 100.0)	Ubiquitination of K (15: 83.710407239819)	1	8.21186	88.0952
2436	Q86VP6	Single Protein	LKAADIDQE	1	NH2-LK<ub>AADIDQE-COOH	576	KR	VK	Ubiquitination of K (2)		Ubiquitination of K (2: 100.0)	Ubiquitination of K (2: 80.61224489795919)	1	6.61646	84.3373
2437	Q9UMS6	Single Protein	DGLPQKSSVK	1	NH2-DGLPQK<ub>SSVK<ub>-COOH	986	AK	VN	Ubiquitination of K (6, 10)		Ubiquitination of K (6: 100.0, 10: 100.0)	Ubiquitination of K (6: 42.35807860262008, 10: 42.35807860262008)	1	3.95129	71.4286
2443	Q9NX07	Single Protein	VYPSCRGGK	1	NH2-VYPSCRGGK<ub>-COOH	119	VK	VV	Ubiquitination of K (9)		Ubiquitination of K (9: 100.0)	Ubiquitination of K (9: 61.30434782608696)	1	4.31364	80.1205
2471	P08620	Single Protein	YPGMFIALSKNGK	1	NH2-YPGMFIALSK<ub>NGK<ub>-COOH	174	YK	TK	Ubiquitination of K (13, 10)		Ubiquitination of K (10: 100.0, 13: 100.0)	Ubiquitination of K (10: 55.1219512195122, 13: 55.1219512195122)	1	4.09369	73.2143
2477	Q16720	Single Protein	MTVVQSYLGDTHYK	0	NH2-MTVVQSYLGDTHYK<ub>-COOH	483	NR	EI	Ubiquitination of K (14)		Ubiquitination of K (14: 100.0)	Ubiquitination of K (14: 48.728813559322035)	1	4.33656	79.0419
2481	Q8WUX2	Single Protein	TTTVIFYPKD	1	NH2-TTTVIFYPK<ub>D-COOH	89	YR	PT	Ubiquitination of K (9)		Ubiquitination of K (9: 100.0)	Ubiquitination of K (9: 52.76595744680851)	1	3.8818	70.6587
2513	Q6ZQQ6	Single Protein	LSPEEEMLQEDKK	1	NH2-LSPEEEMLQEDK<ub>K<ub>-COOH	1503	EK	LK	Ubiquitination of K (12, 13)		Ubiquitination of K (12: 100.0, 13: 100.0)	Ubiquitination of K (12: 98.99497487437185, 13: 98.99497487437185)	1	18.5733	98.8372
2539	O43149	Single Protein	YDTKVGTDK	1	NH2-YDTK<ub>VGTDK<ub>-COOH	1150	TR	WP	Ubiquitination of K (4, 9)		Ubiquitination of K (4: 100.0, 9: 100.0)	Ubiquitination of K (4: 53.4412955465587, 9: 53.4412955465587)	1	3.92477	68.2635
2541	O95071	Single Protein	YCIFDLATGKA	1	NH2-YC<cmm>IFDLATGK<ub>A-COOH	768	VR	EQ	Carbamidomethylation of C (2), Ubiquitination of K (10)		Carbamidomethylation of C (2: 100.0), Ubiquitination of K (10: 100.0)	Carbamidomethylation of C (2: 52.76595744680851), Ubiquitination of K (10: 52.76595744680851)	1	3.8818	70.6587
2546	Q9UPW8	Single Protein	MSLLCVGVKKAK	2	ace-MSLLCVGVK<ub>K<ub>AK<ub>-COOH	1		FD	Acetylation of protein N-term (1), Ubiquitination of K (12, 9, 10)		Acetylation of protein N-term (0: 100.0), Ubiquitination of K (9: 100.0, 10: 100.0, 12: 100.0)	Acetylation of protein N-term (1: 81.77339901477832), Ubiquitination of K (9: 81.77339901477832, 10: 81.77339901477832, 12: 81.77339901477832)	1	7.63428	87.8049
2568	Q9UI08	Single Protein	VKEEIIDAIR	1	NH2-VK<longub>EEIIDAIR-COOH	398	HK	QE	Long ubiquitination (2)		Long ubiquitination (2: 100.0)	Long ubiquitination (2: 79.39698492462311)	1	6.70776	85.2071
2611	A2RU30	Single Protein	MEASVLSPTSWEK	0	NH2-M<ox>EASVLSPTSWEK<ub>-COOH	1		RR	Oxidation of M (1), Ubiquitination of K (13)		Oxidation of M (1: 100.0), Ubiquitination of K (13: 100.0)	Oxidation of M (1: 83.16831683168317), Ubiquitination of K (13: 83.16831683168317)	1	7.92975	86.9822
2666	O75342	Single Protein	DIRKIFPGK	2	NH2-DIRK<ub>IFPGK<ub>-COOH	238	LK	KS	Ubiquitination of K (4, 9)		Ubiquitination of K (4: 100.0, 9: 100.0)	Ubiquitination of K (4: 52.76595744680851, 9: 52.76595744680851)	1	3.8818	70.6587
2677	P55786	Single Protein	GWDPKPGEGHLDALLR	0	NH2-GWDPK<ub>PGEGHLDALLR-COOH	691	RL	GL	Ubiquitination of K (5)		Ubiquitination of K (5: 100.0)	Ubiquitination of K (5: 100.0)	1	100	100
2714	Q9UKZ9	Single Protein	EGNLAIQQAGK	0	pyro-EGNLAIQQAGK<ub>-COOH	344	YK	NM	Pyrolidone from E (1), Ubiquitination of K (11)		Pyrolidone from E (0: 100.0), Ubiquitination of K (11: 100.0)	Pyrolidone from E (1: 49.76525821596244), Ubiquitination of K (11: 49.76525821596244)	1	3.92948	70.3488
2764	Q7Z7H3	Single Protein	VYSTGSRAK	1	NH2-VYSTGSRAK<ub>-COOH	5	SK	DH	Ubiquitination of K (9)		Ubiquitination of K (9: 100.0)	Ubiquitination of K (9: 53.60360360360361)	1	4.00826	73.5955
2799	Q14789	Single Protein	QIWESKAQTEVQLQQK	1	pyro-QIWESK<ub>AQTEVQLQQK<ub>-COOH	2262	DK	VC	Pyrolidone from Q (1), Ubiquitination of K (16, 6)		Pyrolidone from Q (0: 100.0), Ubiquitination of K (6: 100.0, 16: 100.0)	Pyrolidone from Q (1: 86.25), Ubiquitination of K (6: 86.25, 16: 86.25)	1	9.1043	91.2791
2869	Q9ULI0	Single Protein	AGGSGGAGVTLDEARK	1	NH2-AGGSGGAGVTLDEARK<ub>-COOH	58	AK	VE	Ubiquitination of K (16)		Ubiquitination of K (16: 100.0)	Ubiquitination of K (16: 52.76595744680851)	1	3.8818	70.6587
2921	Q8N6R0	Single Protein	KQLAASAGFR	1	NH2-K<ub>QLAASAGFR-COOH	322	GR	RL	Ubiquitination of K (1)		Ubiquitination of K (1: 100.0)	Ubiquitination of K (1: 42.35807860262008)	1	3.95129	71.4286
2925	Q9NZV7	Single Protein	QSKDPLGK	1	NH2-QSK<ub>DPLGK<ub>-COOH	297	SK	DP	Ubiquitination of K (8, 3)		Ubiquitination of K (3: 100.0, 8: 100.0)	Ubiquitination of K (3: 55.1219512195122, 8: 55.1219512195122)	1	4.09369	73.2143
2978	Q9UFH2	Single Protein	EVKYLNFQQQK	1	pyro-EVK<ub>YLNFQQQK<ub>-COOH	684	LR	EI	Pyrolidone from E (1), Ubiquitination of K (11, 3)		Pyrolidone from E (0: 100.0), Ubiquitination of K (3: 100.0, 11: 100.0)	Pyrolidone from E (1: 53.97489539748954), Ubiquitination of K (3: 53.97489539748954, 11: 53.97489539748954)	1	3.96514	71.875
3011	Q96QE4	Single Protein	YKDNPSISGA	1	NH2-YK<ub>DNPSISGA-COOH	938	EK		Ubiquitination of K (2)		Ubiquitination of K (2: 100.0)	Ubiquitination of K (2: 89.81481481481481)	1	10.1703	93.75
3085	Q9UBS4	Single Protein	KLALQLHPDRNPDD	2	NH2-K<ub>LALQLHPDRNPDD-COOH	47	YR	PQ	Ubiquitination of K (1)		Ubiquitination of K (1: 100.0)	Ubiquitination of K (1: 53.97489539748954)	1	3.96514	71.875
3086	P0C6C1	Single Protein	TTKQYLNVPPSPK	1	NH2-TTK<ub>QYLNVPPSPK<ub>-COOH	163	TK	VE	Ubiquitination of K (13, 3)		Ubiquitination of K (3: 100.0, 13: 100.0)	Ubiquitination of K (3: 61.30434782608696, 13: 61.30434782608696)	1	4.31364	80.1205
3165	Q5T848	Single Protein	MITNNPHLQK	0	NH2-M<ox>ITNNPHLQK<ub>-COOH	733	KK	KR	Oxidation of M (1), Ubiquitination of K (10)		Oxidation of M (1: 100.0), Ubiquitination of K (10: 100.0)	Oxidation of M (1: 51.082251082251084), Ubiquitination of K (10: 51.082251082251084)	1	3.85351	71.4286
29	Q86TC9	Single Protein	EGTLIEDSPDFRILQK	1	NH2-EGTLIEDSPDFRILQK<ub>-COOH	471	YR	KP	Ubiquitination of K (16)		Ubiquitination of K (16: 100.0)	Ubiquitination of K (16: 84.89999999999999)	1	6.76882	93.4718
36	Q6AI39	Single Protein	NEVLHTDIMK	0	NH2-NEVLHTDIM<ox>K<longub>-COOH	983	PK	GS	Long ubiquitination (10), Oxidation of M (9)		Long ubiquitination (10: 100.0), Oxidation of M (9: 100.0)	Long ubiquitination (10: 80.28240040342915), Oxidation of M (9: 80.28240040342915)	1	13.4635	98.2405
41	Q9BZF9	Single Protein	EVGIIKASLR	1	NH2-EVGIIK<ub>ASLR-COOH	1179	EK	EK	Ubiquitination of K (6)		Ubiquitination of K (6: 100.0)	Ubiquitination of K (6: 54.582074521651556)	1	4.72965	84.0841
43	A0A0B4J238	Single Protein	WGVFLLYVSMK	0	NH2-WGVFLLYVSMK<ub>-COOH	2	M	MG	Ubiquitination of K (11)		Ubiquitination of K (11: 100.0)	Ubiquitination of K (11: 60.71428571428572)	1	3.9794	68.6567
51	O75110	Single Protein	RDSKIPGTVVR	2	NH2-RDSK<ub>IPGTVVR-COOH	364	IR	SS	Ubiquitination of K (4)		Ubiquitination of K (4: 100.0)	Ubiquitination of K (4: 62.02213279678068)	1	4.57104	81.5249
63	P58397	Single Protein	RQKVPETK	2	NH2-RQK<ub>VPETK<ub>-COOH	197	YR	EP	Ubiquitination of K (8, 3)		Ubiquitination of K (3: 100.0, 8: 100.0)	Ubiquitination of K (3: 59.08404630095622, 8: 59.08404630095622)	1	4.24882	76.7164
70	O15047	Single Protein	SIMQRDLNRK	2	NH2-SIM<ox>QRDLNRK<ub>-COOH	804	MK	MV	Oxidation of M (3), Ubiquitination of K (10)		Oxidation of M (3: 100.0), Ubiquitination of K (10: 100.0)	Oxidation of M (3: 57.30110775427997), Ubiquitination of K (10: 57.30110775427997)	1	4.2064	73.3918
94	Q9NVA4	Single Protein	EELSPIQPVGK	0	NH2-EELSPIQPVGK<ub>-COOH	237	LK	FL	Ubiquitination of K (11)		Ubiquitination of K (11: 100.0)	Ubiquitination of K (11: 52.11055276381909)	1	4.11245	70.1493
153	P26599	Single Protein	GIVPDIAVGTK	0	NH2-GIVPDIAVGTK<ub>-COOH	3	MD	RG	Ubiquitination of K (11)		Ubiquitination of K (11: 100.0)	Ubiquitination of K (11: 76.92307692307692)	1	15.2288	97.929
160	Q9H8G2	Single Protein	KLCQEQLELLSEKK	2	NH2-K<ub>LC<cmm>QEQLELLSEK<ub>K<ub>-COOH	177	IK	IL	Carbamidomethylation of C (3), Ubiquitination of K (1, 13, 14)		Carbamidomethylation of C (3: 100.0), Ubiquitination of K (1: 100.0, 13: 100.0, 14: 100.0)	Carbamidomethylation of C (3: 55.89123867069487), Ubiquitination of K (1: 55.89123867069487, 13: 55.89123867069487, 14: 55.89123867069487)	2	3.77009	67.8073
198	O95714	Single Protein	FQSIICRK	1	NH2-FQSIICRK<ub>-COOH	344	QR	DA	Ubiquitination of K (8)		Ubiquitination of K (8: 100.0)	Ubiquitination of K (8: 62.02213279678068)	1	4.57104	81.5249
200	Q9NUV7	Single Protein	KDLVDYLR	1	NH2-K<ub>DLVDYLR-COOH	384	GR	VH	Ubiquitination of K (1)		Ubiquitination of K (1: 100.0)	Ubiquitination of K (1: 59.08404630095622)	1	4.24882	76.7164
282	O00471	Single Protein	QVCSGEQLANLDK	0	pyro-QVC<cmm>SGEQLANLDK<ub>-COOH	673	LK	NI	Carbamidomethylation of C (3), Pyrolidone from Q (1), Ubiquitination of K (13)		Carbamidomethylation of C (3: 100.0), Pyrolidone from Q (0: 100.0), Ubiquitination of K (13: 100.0)	Carbamidomethylation of C (3: 91.04627766599597), Pyrolidone from Q (1: 91.04627766599597), Ubiquitination of K (13: 91.04627766599597)	1	19.7313	99.7033
283	Q13439	Single Protein	EIVRLQKDLR	2	NH2-EIVRLQK<ub>DLR-COOH	1945	GK	ML	Ubiquitination of K (7)		Ubiquitination of K (7: 100.0)	Ubiquitination of K (7: 49.4)	1	3.69216	66.568
300	Q8NEA6	Single Protein	KGEDFTCFWAGCPR	1	NH2-K<ub>GEDFTCFWAGCPR-COOH	375	QR	RY	Ubiquitination of K (1)		Ubiquitination of K (1: 100.0)	Ubiquitination of K (1: 67.2544080604534)	1	3.93784	68.5879
336	P09874	Single Protein	PDSGLEHSAHVLEKGGK	1	NH2-PDSGLEHSAHVLEK<ub>GGK<ub>-COOH	535	VD	VF	Ubiquitination of K (17, 14)		Ubiquitination of K (14: 100.0, 17: 100.0)	Ubiquitination of K (14: 99.65156794425087, 17: 99.65156794425087)	1	100	100
338	P42261	Related Proteins	KPCDTMKVGGNLDSKGYGIATPK	2	NH2-K<ub>PCDTMK<ub>VGGNLDSK<ub>GYGIATPK<ub>-COOH	730; 737	QR; QR	GS; GS	Ubiquitination of K (1, 7, 15, 23)		Ubiquitination of K (1: 100.0, 7: 100.0, 15: 100.0, 23: 100.0)	Ubiquitination of K (1: 66.70025188916877, 7: 66.70025188916877, 15: 66.70025188916877, 23: 66.70025188916877)	1	3.8742	67.3653
350	Q9H609	Single Protein	CLITFADSKFQER	1	NH2-CLITFADSK<ub>FQER-COOH	39	TR	HM	Ubiquitination of K (9)		Ubiquitination of K (9: 100.0)	Ubiquitination of K (9: 59.08404630095622)	1	4.24882	76.7164
353	P07814	Single Protein	QYVNKNSKHEELMLGDPCLK	2	NH2-QYVNK<ub>NSK<ub>HEELMLGDPCLK<ub>-COOH	643	FK	DL	Ubiquitination of K (8, 20, 5)		Ubiquitination of K (5: 100.0, 8: 100.0, 20: 100.0)	Ubiquitination of K (5: 82.75515334338863, 8: 82.75515334338863, 20: 82.75515334338863)	1	5.81162	91.018
374	Q9UPR3	Single Protein	QGPPTGESSEPEAK	0	NH2-QGPPTGESSEPEAK<ub>-COOH	3	MS	VL	Ubiquitination of K (14)		Ubiquitination of K (14: 100.0)	Ubiquitination of K (14: 57.30110775427997)	1	4.2064	73.3918
422	P42694	Single Protein	AVLCCMQLKGK	1	NH2-AVLCCMQLK<ub>GK<ub>-COOH	97	FR	LQ	Ubiquitination of K (9, 11)		Ubiquitination of K (9: 100.0, 11: 100.0)	Ubiquitination of K (9: 65.10000000000001, 11: 65.10000000000001)	1	4.9091	86.3501
429	P19367	Single Protein	MLPTFVRSIPDGSEK	1	NH2-M<ox>LPTFVRSIPDGSEK<ub>-COOH	63	VK	GD	Oxidation of M (1), Ubiquitination of K (15)		Oxidation of M (1: 100.0), Ubiquitination of K (15: 100.0)	Oxidation of M (1: 79.15407854984893), Ubiquitination of K (15: 79.15407854984893)	1	15.563	98.5294
484	Q9H4L4	Single Protein	WPPPPKPR	0	NH2-WPPPPK<ub>PR-COOH	34	LR	LK	Ubiquitination of K (6)		Ubiquitination of K (6: 100.0)	Ubiquitination of K (6: 68.39195979899498)	1	3.66532	66.3768
490	Q8WZ42	Single Protein	SKTVTSLSIKEASK	2	NH2-SK<ub>TVTSLSIK<ub>EASK<ub>-COOH	26373	SS	ED	Ubiquitination of K (2, 10, 14)		Ubiquitination of K (2: 100.0, 10: 100.0, 14: 100.0)	Ubiquitination of K (2: 81.39768728004022, 10: 81.39768728004022, 14: 81.39768728004022)	1	13.6549	97.9827
549	Q9NRA8	Single Protein	KPPASKCPHRYTK	2	NH2-K<ub>PPASK<ub>CPHRYTK<ub>-COOH	20	LK	EE	Ubiquitination of K (1, 13, 6)		Ubiquitination of K (1: 100.0, 6: 100.0, 13: 100.0)	Ubiquitination of K (1: 77.02702702702703, 6: 77.02702702702703, 13: 77.02702702702703)	1	5.29803	88.9535
556	P09651	Related Proteins	IKEDTEEHHLR	1	NH2-IK<ub>EDTEEHHLR-COOH	112; 119; 112	GG; GG; GG	DY; DY; DY	Ubiquitination of K (2)		Ubiquitination of K (2: 100.0)	Ubiquitination of K (2: 99.29859719438878)	1	16.3811	98.503
585	Q86UP2	Single Protein	SENKDIENLR	1	NH2-SENK<ub>DIENLR-COOH	1194	LR	RE	Ubiquitination of K (4)		Ubiquitination of K (4: 100.0)	Ubiquitination of K (4: 88.98305084745762)	1	19.6379	98.8304
606	Q9UKV0	Single Protein	IIEIQSMSLK	0	NH2-IIEIQSM<ox>SLK<ub>-COOH	1000	QK	FS	Oxidation of M (7), Ubiquitination of K (10)		Oxidation of M (7: 100.0), Ubiquitination of K (10: 100.0)	Oxidation of M (7: 67.7403120281832), Ubiquitination of K (10: 67.7403120281832)	1	3.6494	62.908
632	Q9BXT5	Single Protein	TDVLISVLDSNVK	0	NH2-TDVLISVLDSNVK<ub>-COOH	1264	AK	HF	Ubiquitination of K (13)		Ubiquitination of K (13: 100.0)	Ubiquitination of K (13: 52.11055276381909)	1	4.11245	70.1493
640	Q86XE0	Single Protein	NRKELLGGFLR	2	NH2-NRK<ub>ELLGGFLR-COOH	173	GK	NI	Ubiquitination of K (3)		Ubiquitination of K (3: 100.0)	Ubiquitination of K (3: 54.582074521651556)	1	4.72965	84.0841
677	Q96N23	Single Protein	KMLDITPGCK	1	NH2-K<ub>MLDITPGC<cmm>K<ub>-COOH	1233	GK	SL	Carbamidomethylation of C (9), Ubiquitination of K (1, 10)		Carbamidomethylation of C (9: 100.0), Ubiquitination of K (1: 100.0, 10: 100.0)	Carbamidomethylation of C (9: 54.582074521651556), Ubiquitination of K (1: 54.582074521651556, 10: 54.582074521651556)	1	4.72965	84.0841
682	Q8IXT2	Single Protein	KGTTQPQVPSGK	1	NH2-K<ub>GTTQPQVPSGK<ub>-COOH	115	FR	EN	Ubiquitination of K (12, 1)		Ubiquitination of K (1: 100.0, 12: 100.0)	Ubiquitination of K (1: 65.96701649175412, 12: 65.96701649175412)	1	4.88402	84.9558
731	P60709	Related Proteins	DLTDYLMKILTER	1	NH2-DLTDYLMK<ub>ILTER-COOH	184; 186; 184; 185; 186; 186; 185	GR; GR; GR; GR; GR; GR; GR	GY; GY; GY; GY; GY; GY; GY	Ubiquitination of K (8)		Ubiquitination of K (8: 100.0)	Ubiquitination of K (8: 99.94954591321897)	1	100	100
749	Q9GZY0	Single Protein	PYLKGELLR	1	NH2-PYLK<ub>GELLR-COOH	453	KD	RT	Ubiquitination of K (4)		Ubiquitination of K (4: 100.0)	Ubiquitination of K (4: 63.58585858585859)	1	5.1073	86.8421
804	Q7L2E3	Single Protein	EVEGYGSK	0	NH2-EVEGYGSK<ub>-COOH	98	SV	KI	Ubiquitination of K (8)		Ubiquitination of K (8: 100.0)	Ubiquitination of K (8: 79.15407854984893)	1	15.563	98.5294
806	Q9H1H9	Single Protein	DWLKDFEK	1	NH2-DWLK<ub>DFEK<ub>-COOH	550	RR	ET	Ubiquitination of K (4, 8)		Ubiquitination of K (4: 100.0, 8: 100.0)	Ubiquitination of K (4: 55.89123867069487, 8: 55.89123867069487)	1	4.34241	79.8193
823	Q6B0I6	Single Protein	GRGRPPQK	1	NH2-GRGRPPQK<ub>-COOH	452	RR	LR	Ubiquitination of K (8)		Ubiquitination of K (8: 100.0)	Ubiquitination of K (8: 91.09109109109109)	1	19.6379	98.8304
857	Q9HCZ1	Single Protein	RAILITQKGR	2	NH2-RAILITQK<ub>GR-COOH	221	FK	QT	Ubiquitination of K (8)		Ubiquitination of K (8: 100.0)	Ubiquitination of K (8: 55.89123867069487)	1	4.34241	79.8193
891	Q13439	Single Protein	TKLITQLRDAK	2	NH2-TK<ub>LITQLRDAK<ub>-COOH	342	EK	NL	Ubiquitination of K (2, 11)		Ubiquitination of K (2: 100.0, 11: 100.0)	Ubiquitination of K (2: 64.36090225563909, 11: 64.36090225563909)	1	4.77121	84.6847
936	Q9HCM4	Single Protein	EAQRAATHIPAAGDSK	1	pyro-EAQRAATHIPAAGDSK<ub>-COOH	25	LR	SI	Pyrolidone from E (1), Ubiquitination of K (16)		Pyrolidone from E (0: 100.0), Ubiquitination of K (16: 100.0)	Pyrolidone from E (1: 74.71264367816092), Ubiquitination of K (16: 74.71264367816092)	1	5.14563	88.1306
942	Q9UPX8	Single Protein	AAENMAVEPRVATIK	1	NH2-AAENMAVEPRVATIK<ub>-COOH	405	SR	QR	Ubiquitination of K (15)		Ubiquitination of K (15: 100.0)	Ubiquitination of K (15: 52.11055276381909)	1	4.11245	70.1493
958	Q96MN2	Single Protein	CVQELLVANFEKARR	2	NH2-C<cmm>VQELLVANFEK<ub>ARR-COOH	479	VR	AH	Carbamidomethylation of C (1), Ubiquitination of K (12)		Carbamidomethylation of C (1: 100.0), Ubiquitination of K (12: 100.0)	Carbamidomethylation of C (1: 54.582074521651556), Ubiquitination of K (12: 54.582074521651556)	1	4.72965	84.0841
960	P13645	Single Protein	SVGESSSKGPR	1	NH2-SVGESSSK<ub>GPR-COOH	573	SG	Y	Ubiquitination of K (8)		Ubiquitination of K (8: 100.0)	Ubiquitination of K (8: 55.89123867069487)	1	4.34241	79.8193
992	Q9NVI7	Single Protein	MCWLKAEGPGRG	2	NH2-MC<cmm>WLK<ub>AEGPGRG-COOH	617	QK	DE	Carbamidomethylation of C (2), Ubiquitination of K (5)		Carbamidomethylation of C (2: 100.0), Ubiquitination of K (5: 100.0)	Carbamidomethylation of C (2: 73.72335151214675), Ubiquitination of K (5: 73.72335151214675)	1	8.40644	95.1567
1010	Q9P2E8	Single Protein	HQGLLKCRCR	2	NH2-HQGLLK<longub>CRCR-COOH	34	LR	ML	Long ubiquitination (6)		Long ubiquitination (6: 100.0)	Long ubiquitination (6: 65.96701649175412)	1	4.88402	84.9558
1017	Q12923	Single Protein	LFPGQPAAESGK	0	NH2-LFPGQPAAESGK<ub>-COOH	1536	KK	ID	Ubiquitination of K (12)		Ubiquitination of K (12: 100.0)	Ubiquitination of K (12: 67.7403120281832)	1	3.6494	62.908
1032	P46937	Single Protein	NKTTSWLDPR	1	NH2-NK<ub>TTSWLDPR-COOH	253	HK	LD	Ubiquitination of K (2)		Ubiquitination of K (2: 100.0)	Ubiquitination of K (2: 64.36090225563909)	1	4.77121	84.6847
1067	O94850	Single Protein	ELQDEESGSCLWVQKSK	1	pyro-ELQDEESGSCLWVQK<ub>SK<ub>-COOH	16	PR	LL	Pyrolidone from E (1), Ubiquitination of K (17, 15)		Pyrolidone from E (0: 100.0), Ubiquitination of K (15: 100.0, 17: 100.0)	Pyrolidone from E (1: 67.2544080604534), Ubiquitination of K (15: 67.2544080604534, 17: 67.2544080604534)	1	3.93784	68.5879
1092	Q8N122	Single Protein	QAQQVIQK	0	NH2-QAQQVIQK<ub>-COOH	1001	RR	GI	Ubiquitination of K (8)		Ubiquitination of K (8: 100.0)	Ubiquitination of K (8: 68.39195979899498)	1	3.66532	66.3768
1103	Q9BXT5	Single Protein	MKNFADLEDSSK	1	NH2-MK<ub>NFADLEDSSK<ub>-COOH	238	GK	HE	Ubiquitination of K (12, 2)		Ubiquitination of K (2: 100.0, 12: 100.0)	Ubiquitination of K (2: 53.54291417165668, 12: 53.54291417165668)	1	4.41046	79.7619
1121	Q9NXL9	Single Protein	FDLILVLLDTK	0	NH2-FDLILVLLDTK<ub>-COOH	483	SR	NE	Ubiquitination of K (11)		Ubiquitination of K (11: 100.0)	Ubiquitination of K (11: 55.89123867069487)	1	4.34241	79.8193
1148	Q9BYD9	Single Protein	RLVKDIAK	2	NH2-RLVK<ub>DIAK<ub>-COOH	309	DK	VA	Ubiquitination of K (4, 8)		Ubiquitination of K (4: 100.0, 8: 100.0)	Ubiquitination of K (4: 53.54291417165668, 8: 53.54291417165668)	1	4.41046	79.7619
1163	Q86TI2	Single Protein	RLTFCHQGLSNVLDDPK	1	NH2-RLTFC<cmm>HQGLSNVLDDPK<ub>-COOH	221	ER	SA	Carbamidomethylation of C (5), Ubiquitination of K (17)		Carbamidomethylation of C (5: 100.0), Ubiquitination of K (17: 100.0)	Carbamidomethylation of C (5: 67.7403120281832), Ubiquitination of K (17: 67.7403120281832)	1	3.6494	62.908
1193	Q13563	Single Protein	VNSSRVQPQQPGDAK	1	ace-VNSSRVQPQQPGDAK<ub>-COOH	2	M	RP	Acetylation of protein N-term (1), Ubiquitination of K (15)		Acetylation of protein N-term (0: 100.0), Ubiquitination of K (15: 100.0)	Acetylation of protein N-term (1: 65.10000000000001), Ubiquitination of K (15: 65.10000000000001)	1	3.6446	62.3229
1227	A0A1B0GV03	Single Protein	QEKQMLKQK	2	pyro-QEK<ub>QM<ox>LK<ub>QK<ub>-COOH	344	RK	EQ	Oxidation of M (5), Pyrolidone from Q (1), Ubiquitination of K (9, 3, 7)		Oxidation of M (5: 100.0), Pyrolidone from Q (0: 100.0), Ubiquitination of K (3: 100.0, 7: 100.0, 9: 100.0)	Oxidation of M (5: 65.10000000000001), Pyrolidone from Q (1: 65.10000000000001), Ubiquitination of K (3: 65.10000000000001, 7: 65.10000000000001, 9: 65.10000000000001)	1	4.9091	86.3501
1233	Q14692	Single Protein	TNIKCDRK	2	NH2-TNIK<ub>CDRK<ub>-COOH	272	IR	VS	Ubiquitination of K (4, 8)		Ubiquitination of K (4: 100.0, 8: 100.0)	Ubiquitination of K (4: 55.89123867069487, 8: 55.89123867069487)	1	4.34241	79.8193
1300	Q12907	Single Protein	EGSIWNHQPCFLK	0	pyro-EGSIWNHQPC<cmm>FLK<ub>-COOH	98	SK	DW	Carbamidomethylation of C (10), Pyrolidone from E (1), Ubiquitination of K (13)		Carbamidomethylation of C (10: 100.0), Pyrolidone from E (0: 100.0), Ubiquitination of K (13: 100.0)	Carbamidomethylation of C (10: 54.582074521651556), Pyrolidone from E (1: 54.582074521651556), Ubiquitination of K (13: 54.582074521651556)	1	4.72965	84.0841
1326	Q6AHZ1	Single Protein	NVKIDLPK	1	NH2-NVK<ub>IDLPK<ub>-COOH	47	LK	IN	Ubiquitination of K (8, 3)		Ubiquitination of K (3: 100.0, 8: 100.0)	Ubiquitination of K (3: 59.08404630095622, 8: 59.08404630095622)	1	4.24882	76.7164
1336	Q96FC7	Single Protein	QRLPQLNSK	1	NH2-QRLPQLNSK<ub>-COOH	298	CK	DN	Ubiquitination of K (9)		Ubiquitination of K (9: 100.0)	Ubiquitination of K (9: 57.30110775427997)	1	4.2064	73.3918
1452	Q8IWA4	Single Protein	LCQQVDITQK	0	NH2-LCQQVDITQK<ub>-COOH	680	AR	QL	Ubiquitination of K (10)		Ubiquitination of K (10: 100.0)	Ubiquitination of K (10: 90.20387866732969)	1	19.6848	99.7041
1468	Q7Z713	Single Protein	MLLLDCNPEVDGLK	0	NH2-MLLLDC<cmm>NPEVDGLK<longub>-COOH	1		HL	Carbamidomethylation of C (6), Long ubiquitination (14)		Carbamidomethylation of C (6: 100.0), Long ubiquitination (14: 100.0)	Carbamidomethylation of C (6: 73.0309072781655), Long ubiquitination (14: 73.0309072781655)	1	4.62856	83.4835
1486	A0A0B4J249	Single Protein	LTVLLNKK	1	NH2-LTVLLNK<ub>K<ub>-COOH	82	QR	DK	Ubiquitination of K (8, 7)		Ubiquitination of K (7: 100.0, 8: 100.0)	Ubiquitination of K (7: 52.11055276381909, 8: 52.11055276381909)	1	4.11245	70.1493
1528	Q14697	Single Protein	RSSECMKDDPITLFV	2	NH2-RSSECMK<ub>DDPITLFV-COOH	818	VR	AL	Ubiquitination of K (7)		Ubiquitination of K (7: 100.0)	Ubiquitination of K (7: 52.11055276381909)	1	4.11245	70.1493
1570	Q6ZUA9	Single Protein	KVAILILTK	1	NH2-K<ub>VAILILTK<ub>-COOH	1018	ER	FL	Ubiquitination of K (1, 9)		Ubiquitination of K (1: 100.0, 9: 100.0)	Ubiquitination of K (1: 65.96701649175412, 9: 65.96701649175412)	1	4.88402	84.9558
1587	Q8IX29	Single Protein	NNSGEKALPPWR	1	NH2-NNSGEK<ub>ALPPWR-COOH	209	KK	SS	Ubiquitination of K (6)		Ubiquitination of K (6: 100.0)	Ubiquitination of K (6: 55.89123867069487)	1	4.34241	79.8193
1589	P35637	Single Protein	PKPDGPGGGPGGSHMGGNYGDDR	0	NH2-PK<ub>PDGPGGGPGGSHMGGNYGDDR-COOH	450	KA	RG	Ubiquitination of K (2)		Ubiquitination of K (2: 100.0)	Ubiquitination of K (2: 99.9198717948718)	1	25.977	99.7101
1663	Q8NE09	Single Protein	KVELVEETR	1	NH2-K<ub>VELVEETR-COOH	787	YK	QL	Ubiquitination of K (1)		Ubiquitination of K (1: 100.0)	Ubiquitination of K (1: 63.58585858585859)	1	5.1073	86.8421
1669	O14578	Single Protein	GPSTSRSSPNK	1	NH2-GPSTSRSSPNK<ub>-COOH	1913	HR	RG	Ubiquitination of K (11)		Ubiquitination of K (11: 100.0)	Ubiquitination of K (11: 62.02213279678068)	1	4.57104	81.5249
1671	Q12884	Single Protein	MILPPQFDRSK	1	NH2-M<ox>ILPPQFDRSK<ub>-COOH	522	YK	KY	Oxidation of M (1), Ubiquitination of K (11)		Oxidation of M (1: 100.0), Ubiquitination of K (11: 100.0)	Oxidation of M (1: 54.582074521651556), Ubiquitination of K (11: 54.582074521651556)	1	4.72965	84.0841
1673	Q8WZ84	Single Protein	MLVNFLGK	0	NH2-M<ox>LVNFLGK<ub>-COOH	81	PK	KN	Oxidation of M (1), Ubiquitination of K (8)		Oxidation of M (1: 100.0), Ubiquitination of K (8: 100.0)	Oxidation of M (1: 63.58585858585859), Ubiquitination of K (8: 63.58585858585859)	1	5.1073	86.8421
1679	P51884	Single Protein	LHINHNNLTESVGPLPK	0	NH2-LHINHNNLTESVGPLPK<ub>-COOH	121	KK	SL	Ubiquitination of K (17)		Ubiquitination of K (17: 100.0)	Ubiquitination of K (17: 80.28240040342915)	1	13.4635	98.2405
1697	Q8WZ42	Single Protein	EVTLDDISQIKAQVK	1	pyro-EVTLDDISQIK<ub>AQVK<ub>-COOH	12561	MK	EL	Pyrolidone from E (1), Ubiquitination of K (15, 11)		Pyrolidone from E (0: 100.0), Ubiquitination of K (11: 100.0, 15: 100.0)	Pyrolidone from E (1: 99.34640522875817), Ubiquitination of K (11: 99.34640522875817, 15: 99.34640522875817)	3	100	100
1704	Q9GZR7	Single Protein	MDKTAKLDLLMQK	2	NH2-MDK<ub>TAK<ub>LDLLMQK<ub>-COOH	529	KK	IG	Ubiquitination of K (13, 6, 3)		Ubiquitination of K (3: 100.0, 6: 100.0, 13: 100.0)	Ubiquitination of K (3: 74.64929859719439, 6: 74.64929859719439, 13: 74.64929859719439)	1	5.11499	88.0597
1720	Q86UK0	Single Protein	MRSLKQMHLPR	2	NH2-MRSLK<longub>QMHLPR-COOH	691	DK	SV	Long ubiquitination (5)		Long ubiquitination (5: 100.0)	Long ubiquitination (5: 64.36090225563909)	1	4.77121	84.6847
1724	Q9HB71	Single Protein	KVKTDTVLILCR	2	NH2-K<ub>VK<ub>TDTVLILCR-COOH	144	SK	KK	Ubiquitination of K (1, 3)		Ubiquitination of K (1: 100.0, 3: 100.0)	Ubiquitination of K (1: 75.99601593625498, 3: 75.99601593625498)	1	11.4167	96.7262
1733	Q9Y466	Single Protein	YPTQPCRFGK	1	NH2-YPTQPCRFGK<ub>-COOH	333	TR	LL	Ubiquitination of K (10)		Ubiquitination of K (10: 100.0)	Ubiquitination of K (10: 52.11055276381909)	1	4.11245	70.1493
1744	O43252	Single Protein	MEIPGSLCK	0	NH2-M<ox>EIPGSLCK<ub>-COOH	1		KV	Oxidation of M (1), Ubiquitination of K (9)		Oxidation of M (1: 100.0), Ubiquitination of K (9: 100.0)	Oxidation of M (1: 68.39195979899498), Ubiquitination of K (9: 68.39195979899498)	1	3.66532	66.3768
1762	Q15814	Single Protein	TRGKDAASSTK	2	NH2-TRGK<ub>DAASSTK<ub>-COOH	141	FK	VD	Ubiquitination of K (4, 11)		Ubiquitination of K (4: 100.0, 11: 100.0)	Ubiquitination of K (4: 89.07563025210084, 11: 89.07563025210084)	1	19.9123	99.7126
1765	Q92766	Single Protein	IGRRNQETK	2	NH2-IGRRNQETK<ub>-COOH	52	NR	EE	Ubiquitination of K (9)		Ubiquitination of K (9: 100.0)	Ubiquitination of K (9: 55.89123867069487)	1	4.34241	79.8193
1805	P0CF97	Single Protein	WLSQGKILSRVYELR	2	NH2-WLSQGK<ub>ILSRVYELR-COOH	388	IR	NE	Ubiquitination of K (6)		Ubiquitination of K (6: 100.0)	Ubiquitination of K (6: 57.30110775427997)	1	4.2064	73.3918
1868	O60486	Single Protein	KHENEFNEEVALTEIYK	1	NH2-K<ub>HENEFNEEVALTEIYK<ub>-COOH	1510	SK	YI	Ubiquitination of K (1, 17)		Ubiquitination of K (1: 100.0, 17: 100.0)	Ubiquitination of K (1: 68.39195979899498, 17: 68.39195979899498)	1	4.02886	69.3452
1916	Q8WU20	Single Protein	RDAPSVNK	1	NH2-RDAPSVNK<longub>-COOH	296	ER	LV	Long ubiquitination (8)		Long ubiquitination (8: 100.0)	Long ubiquitination (8: 75.87587587587588)	1	11.4613	96.7262
1973	Q9NYI0	Single Protein	DRERISEQEEHVK	2	NH2-DRERISEQEEHVK<ub>-COOH	410	ER	GE	Ubiquitination of K (13)		Ubiquitination of K (13: 100.0)	Ubiquitination of K (13: 81.50924537731134)	1	5.72902	90.7738
2075	P48200	Single Protein	CAIQNAPNPGGGDLQK	0	NH2-CAIQNAPNPGGGDLQK<ub>-COOH	137	SK	AG	Ubiquitination of K (16)		Ubiquitination of K (16: 100.0)	Ubiquitination of K (16: 63.58585858585859)	1	5.1073	86.8421
2166	Q9H3N1	Single Protein	KLLSESAQPLKK	2	NH2-K<ub>LLSESAQPLK<ub>K<ub>-COOH	223	SK	VE	Ubiquitination of K (12, 1, 11)		Ubiquitination of K (1: 100.0, 11: 100.0, 12: 100.0)	Ubiquitination of K (1: 65.10000000000001, 11: 65.10000000000001, 12: 65.10000000000001)	1	4.9091	86.3501
2168	P46087	Single Protein	CAHLQKELLLSAID	1	NH2-CAHLQK<ub>ELLLSAID-COOH	487	LR	SV	Ubiquitination of K (6)		Ubiquitination of K (6: 100.0)	Ubiquitination of K (6: 67.7403120281832)	1	3.6494	62.908
2169	Q68DX3	Single Protein	GKSYLALR	1	NH2-GK<ub>SYLALR-COOH	335	KK	DL	Ubiquitination of K (2)		Ubiquitination of K (2: 100.0)	Ubiquitination of K (2: 66.70025188916877)	1	3.65329	64.3917
2189	P23378	Single Protein	DVSGVLFQYPDTEGK	0	NH2-DVSGVLFQYPDTEGK<longub>-COOH	258	GK	VE	Long ubiquitination (15)		Long ubiquitination (15: 100.0)	Long ubiquitination (15: 67.2544080604534)	1	3.8742	67.3653
2214	Q8TAT2	Single Protein	QVLGGLRKK	2	pyro-QVLGGLRK<ub>K<ub>-COOH	112	WK	RR	Pyrolidone from Q (1), Ubiquitination of K (8, 9)		Pyrolidone from Q (0: 100.0), Ubiquitination of K (8: 100.0, 9: 100.0)	Pyrolidone from Q (1: 64.36090225563909), Ubiquitination of K (8: 64.36090225563909, 9: 64.36090225563909)	1	4.77121	84.6847
2229	Q9BY31	Single Protein	KSFLTIHQRTHTGK	2	NH2-K<ub>SFLTIHQRTHTGK<ub>-COOH	649	HR	NR	Ubiquitination of K (1, 14)		Ubiquitination of K (1: 100.0, 14: 100.0)	Ubiquitination of K (1: 54.582074521651556, 14: 54.582074521651556)	1	4.72965	84.0841
2236	Q9Y6X0	Single Protein	EIEAIQCEVRK	1	pyro-EIEAIQCEVRK<ub>-COOH	1403	RR	MC	Pyrolidone from E (1), Ubiquitination of K (11)		Pyrolidone from E (0: 100.0), Ubiquitination of K (11: 100.0)	Pyrolidone from E (1: 77.8391959798995), Ubiquitination of K (11: 77.8391959798995)	1	15.3991	98.2301
2357	Q8WWI1	Single Protein	QQILQEMRK	1	pyro-QQILQEM<ox>RK<ub>-COOH	1468	ER	RT	Oxidation of M (7), Pyrolidone from Q (1), Ubiquitination of K (9)		Oxidation of M (7: 100.0), Pyrolidone from Q (0: 100.0), Ubiquitination of K (9: 100.0)	Oxidation of M (7: 65.96701649175412), Pyrolidone from Q (1: 65.96701649175412), Ubiquitination of K (9: 65.96701649175412)	1	4.88402	84.9558
2364	Q9NYK5	Single Protein	HVGKTDPGTVFVMNK	1	NH2-HVGK<ub>TDPGTVFVMNK<ub>-COOH	69	VK	NI	Ubiquitination of K (4, 15)		Ubiquitination of K (4: 100.0, 15: 100.0)	Ubiquitination of K (4: 68.39195979899498, 15: 68.39195979899498)	1	3.66532	66.3768
2418	P11413	Single Protein	ALPPTVYEAVTK	0	NH2-ALPPTVYEAVTK<ub>-COOH	141	YL	NI	Ubiquitination of K (12)		Ubiquitination of K (12: 100.0)	Ubiquitination of K (12: 60.71428571428572)	1	3.9794	68.6567
2421	P16949	Single Protein	REHEKEVLQK	2	NH2-REHEK<ub>EVLQK<ub>-COOH	76	EK	AI	Ubiquitination of K (5, 10)		Ubiquitination of K (5: 100.0, 10: 100.0)	Ubiquitination of K (5: 63.58585858585859, 10: 63.58585858585859)	1	5.1073	86.8421
2510	Q96IF1	Single Protein	ERLGEKASR	2	NH2-ERLGEK<longub>ASR-COOH	2	M	LL	Long ubiquitination (6)		Long ubiquitination (6: 100.0)	Long ubiquitination (6: 33.11491935483871)	4	6.09573	91.1762
2520	Q6E0U4	Single Protein	SKLGFINWDAINK	1	NH2-SK<ub>LGFINWDAINK<ub>-COOH	366	FK	NQ	Ubiquitination of K (13, 2)		Ubiquitination of K (2: 100.0, 13: 100.0)	Ubiquitination of K (2: 84.89999999999999, 13: 84.89999999999999)	1	15.3991	98.2301
2541	Q9NZQ3	Single Protein	HEPQPPHSVLK	0	NH2-HEPQPPHSVLK<ub>-COOH	606	FK	FL	Ubiquitination of K (11)		Ubiquitination of K (11: 100.0)	Ubiquitination of K (11: 63.58585858585859)	1	5.1073	86.8421
2552	Q7Z3B3	Single Protein	HRAPMPGSLPDSARK	2	NH2-HRAPMPGSLPDSARK<ub>-COOH	707	LK	DR	Ubiquitination of K (15)		Ubiquitination of K (15: 100.0)	Ubiquitination of K (15: 65.10000000000001)	1	4.9091	86.3501
2579	Q0P6D6	Single Protein	LPLALNPLK	0	NH2-LPLALNPLK<ub>-COOH	16	SR	SK	Ubiquitination of K (9)		Ubiquitination of K (9: 100.0)	Ubiquitination of K (9: 52.11055276381909)	1	4.11245	70.1493
2597	Q96AQ6	Single Protein	RQGPKEPPR	2	NH2-RQGPK<longub>EPPR-COOH	535	GK	KS	Long ubiquitination (5)		Long ubiquitination (5: 100.0)	Long ubiquitination (5: 75.99601593625498)	1	11.4167	96.7262
2608	Q8WUJ3	Single Protein	EPAIIRHFIAYK	1	NH2-EPAIIRHFIAYK<ub>-COOH	777	PR	NQ	Ubiquitination of K (12)		Ubiquitination of K (12: 100.0)	Ubiquitination of K (12: 49.4)	1	3.69216	66.568
2623	P58304	Single Protein	MSKSALNQTK	1	NH2-M<ox>SK<ub>SALNQTK<ub>-COOH	135	RK	KR	Oxidation of M (1), Ubiquitination of K (10, 3)		Oxidation of M (1: 100.0), Ubiquitination of K (3: 100.0, 10: 100.0)	Oxidation of M (1: 52.11055276381909), Ubiquitination of K (3: 52.11055276381909, 10: 52.11055276381909)	1	4.11245	70.1493
2642	Q8N9C0	Single Protein	MIWIKGTEPLR	1	NH2-M<ox>IWIK<ub>GTEPLR-COOH	266	VK	IQ	Oxidation of M (1), Ubiquitination of K (5)		Oxidation of M (1: 100.0), Ubiquitination of K (5: 100.0)	Oxidation of M (1: 66.70025188916877), Ubiquitination of K (5: 66.70025188916877)	1	3.65329	64.3917
2658	O60508	Single Protein	LFPLSGHLLLSCSMDCK	0	NH2-LFPLSGHLLLSC<cmm>SM<ox>DC<cmm>K<ub>-COOH	296	VR	IK	Carbamidomethylation of C (16, 12), Oxidation of M (14), Ubiquitination of K (17)		Carbamidomethylation of C (12: 100.0, 16: 100.0), Oxidation of M (14: 100.0), Ubiquitination of K (17: 100.0)	Carbamidomethylation of C (12: 53.54291417165668, 16: 53.54291417165668), Oxidation of M (14: 53.54291417165668), Ubiquitination of K (17: 53.54291417165668)	1	4.41046	79.7619
2669	P04090	Single Protein	AVADSWMEEVIK	0	NH2-AVADSWM<ox>EEVIK<ub>-COOH	22	SR	LC	Oxidation of M (7), Ubiquitination of K (12)		Oxidation of M (7: 100.0), Ubiquitination of K (12: 100.0)	Oxidation of M (7: 55.89123867069487), Ubiquitination of K (12: 55.89123867069487)	1	4.34241	79.8193
2687	Q86TD4	Single Protein	ALYADTAPQDK	0	NH2-ALYADTAPQDK<ub>-COOH	54	ER	KL	Ubiquitination of K (11)		Ubiquitination of K (11: 100.0)	Ubiquitination of K (11: 49.4)	1	3.69216	66.568
2732	Q8N8Q3	Single Protein	GFGVACHLGVLTDLPCVGVAK	0	NH2-GFGVAC<cmm>HLGVLTDLPCVGVAK<longub>-COOH	135	HR	KL	Carbamidomethylation of C (6), Long ubiquitination (21)		Carbamidomethylation of C (6: 50.0, 16: 50.0), Long ubiquitination (21: 100.0)	Carbamidomethylation of C (6: 68.39195979899498), Long ubiquitination (21: 68.39195979899498)	1	4.02886	69.3452
2746	A6NCC3	Related Proteins	ALSAVIATEK	0	NH2-ALSAVIATEK<ub>-COOH	183; 183; 183	ES; ES; ER	KK; KK; KK	Ubiquitination of K (10)		Ubiquitination of K (10: 100.0)	Ubiquitination of K (10: 55.89123867069487)	1	4.34241	79.8193
2753	A0A087WXS9	Single Protein	MKNPGRYQIMK	2	NH2-M<ox>K<ub>NPGRYQIMK<ub>-COOH	122	MK	EK	Oxidation of M (1), Ubiquitination of K (2, 11)		Oxidation of M (1: 99.99230809866633, 10: 0.00769190133367431), Ubiquitination of K (2: 100.0, 11: 100.0)	Oxidation of M (1: 85.74277168494517), Ubiquitination of K (2: 85.74277168494517, 11: 85.74277168494517)	1	14.0654	97.9104
2817	Q9BW92	Single Protein	LASMAQKEPR	1	NH2-LASM<ox>AQK<longub>EPR-COOH	50	KR	TI	Long ubiquitination (7), Oxidation of M (4)		Long ubiquitination (7: 100.0), Oxidation of M (4: 100.0)	Long ubiquitination (7: 49.4), Oxidation of M (4: 49.4)	1	3.69216	66.568
2840	Q9C0I3	Single Protein	TTTELTGTVPCAIMSPGKYR	1	NH2-TTTELTGTVPCAIM<ox>SPGK<ub>YR-COOH	306	TK	LE	Oxidation of M (14), Ubiquitination of K (18)		Oxidation of M (14: 100.0), Ubiquitination of K (18: 100.0)	Oxidation of M (14: 77.91687531296945), Ubiquitination of K (18: 77.91687531296945)	1	5.37973	89.049
2907	Q5VUA4	Single Protein	AESVPKPLGSSESEVMR	0	NH2-AESVPK<ub>PLGSSESEVMR-COOH	548	LK	QK	Ubiquitination of K (6)		Ubiquitination of K (6: 100.0)	Ubiquitination of K (6: 75.99601593625498)	1	11.4167	96.7262
2909	P43220	Single Protein	DSSMKPLK	0	NH2-DSSM<ox>K<ub>PLK<ub>-COOH	430	QR	CP	Oxidation of M (4), Ubiquitination of K (8, 5)		Oxidation of M (4: 100.0), Ubiquitination of K (5: 100.0, 8: 100.0)	Oxidation of M (4: 57.30110775427997), Ubiquitination of K (5: 57.30110775427997, 8: 57.30110775427997)	1	4.2064	73.3918
2911	Q5CZC0	Single Protein	MLPKLQPLKMFSDK	2	NH2-M<ox>LPK<ub>LQPLK<ub>MFSDK<ub>-COOH	3039	KK	SE	Oxidation of M (1), Ubiquitination of K (9, 4, 14)		Oxidation of M (1: 99.89453400831168, 10: 50.0), Ubiquitination of K (4: 100.0, 9: 100.0, 14: 100.0)	Oxidation of M (1: 54.582074521651556), Ubiquitination of K (4: 54.582074521651556, 9: 54.582074521651556, 14: 54.582074521651556)	3	5.61149	89.5727
2915	Q9BXP5	Single Protein	ADAIVKMLDAAVIK	1	NH2-ADAIVK<ub>MLDAAVIK<ub>-COOH	243	DK	ME	Ubiquitination of K (6, 14)		Ubiquitination of K (6: 100.0, 14: 100.0)	Ubiquitination of K (6: 67.2544080604534, 14: 67.2544080604534)	1	3.8742	67.3653
2917	P48444	Single Protein	GKEVDNFVDKLK	2	NH2-GK<ub>EVDNFVDK<ub>LK<ub>-COOH	232	AK	SE	Ubiquitination of K (12, 2, 10)		Ubiquitination of K (2: 100.0, 10: 100.0, 12: 100.0)	Ubiquitination of K (2: 67.7403120281832, 10: 67.7403120281832, 12: 67.7403120281832)	2	5.29449	88.9535
2921	Q6PRD1	Single Protein	IFPKSHSLK	1	NH2-IFPK<ub>SHSLK<ub>-COOH	1068	PK	AP	Ubiquitination of K (4, 9)		Ubiquitination of K (4: 100.0, 9: 100.0)	Ubiquitination of K (4: 60.71428571428572, 9: 60.71428571428572)	1	3.9794	68.6567

## Sheet: DB4h Ub-proteins
Sample	Protein(s)	Protein Inference	Sequence	Missed Cleavages	Modified Sequence	Position	AAs Before	AAs After	Variable Modifications	Fixed Modifications	Probabilistic PTM score	D-score	#PSMs	Score	Confidence [%]
AKT_04	Q16288	Related Proteins	WMPPESIMYRK	1	NH2-WM<ox>PPESIMYRK<ub>-COOH	736; 719	IR; IR	FT; FT	Oxidation of M (2), Ubiquitination of K (11)		Oxidation of M (2: 99.9999999999999, 8: 50.0), Ubiquitination of K (11: 100.0)	Oxidation of M (2: 44.44444444444444), Ubiquitination of K (11: 44.44444444444444)	25	53.3183	98.3193
AKT_04	Q07889	Related Proteins	WAIADAQSAIEK	0	NH2-WAIADAQSAIEK<ub>-COOH	85; 85	DK; DK	RK; RK	Ubiquitination of K (12)		Ubiquitination of K (12: 100.0)	Ubiquitination of K (12: 96.45833333333333)	2	26.3918	94.979
AKT_04	Q6P2I3	Related Proteins	GDEVQCEIEELGVIINK	0	NH2-GDEVQCEIEELGVIINK<ub>-COOH	296; 296	KK; KK	VV; VV	Ubiquitination of K (17)		Ubiquitination of K (17: 100.0)	Ubiquitination of K (17: 99.59514170040485)	12	47.9119	99.1597
AKT_04	P47883	Single Protein	MDLGNSGNDSVVTK	0	ace-MDLGNSGNDSVVTK<ub>-COOH	1		FV	Acetylation of protein N-term (1), Ubiquitination of K (14)		Acetylation of protein N-term (0: 100.0), Ubiquitination of K (14: 100.0)	Acetylation of protein N-term (1: 88.50574712643679), Ubiquitination of K (14: 88.50574712643679)	2	11.4027	79.916
AKT_04	A0JNW5	Single Protein	CPPNLAPLCVSYKNMK	1	NH2-C<cmm>PPNLAPLC<cmm>VSYK<ub>NMK<ub>-COOH	1090	ER	RS	Carbamidomethylation of C (1, 9), Ubiquitination of K (16, 13)		Carbamidomethylation of C (1: 100.0, 9: 100.0), Ubiquitination of K (13: 100.0, 16: 100.0)	Carbamidomethylation of C (1: 52.33968804159446, 9: 52.33968804159446), Ubiquitination of K (13: 52.33968804159446, 16: 52.33968804159446)	28	44.8465	99.1597
AKT_04	P21817	Single Protein	EKEMITSLFCKLAALVR	2	pyro-EK<ub>EM<ox>ITSLFC<cmm>K<ub>LAALVR-COOH	3035	NK	HR	Carbamidomethylation of C (10), Oxidation of M (4), Pyrolidone from E (1), Ubiquitination of K (2, 11)		Carbamidomethylation of C (10: 100.0), Oxidation of M (4: 100.0), Pyrolidone from E (0: 100.0), Ubiquitination of K (2: 100.0, 11: 100.0)	Carbamidomethylation of C (10: 67.5), Oxidation of M (4: 67.5), Pyrolidone from E (1: 67.5), Ubiquitination of K (2: 67.5, 11: 67.5)	3	11.4239	80
AKT_04	P35609	Single Protein	ELPPDQAQYCIK	0	NH2-ELPPDQAQYC<cmm>IK<ub>-COOH	853	RR	RM	Carbamidomethylation of C (10), Ubiquitination of K (12)		Carbamidomethylation of C (10: 100.0), Ubiquitination of K (12: 100.0)	Carbamidomethylation of C (10: 100.0), Ubiquitination of K (12: 100.0)	2	100	100
AKT_04	P11413	Single Protein	RWDGVPFILRCGK	2	NH2-RWDGVPFILRC<cmm>GK<ub>-COOH	348	NE	AL	Carbamidomethylation of C (11), Ubiquitination of K (13)		Carbamidomethylation of C (11: 100.0), Ubiquitination of K (13: 100.0)	Carbamidomethylation of C (11: 89.13934426229508), Ubiquitination of K (13: 89.13934426229508)	1	11.6137	84.8739
AKT_04	Q9UQ80	Single Protein	ARMGVVECAK	1	NH2-ARM<ox>GVVEC<cmm>AK<ub>-COOH	289	KK	HE	Carbamidomethylation of C (8), Oxidation of M (3), Ubiquitination of K (10)		Carbamidomethylation of C (8: 100.0), Oxidation of M (3: 100.0), Ubiquitination of K (10: 100.0)	Carbamidomethylation of C (8: 96.72131147540983), Oxidation of M (3: 96.72131147540983), Ubiquitination of K (10: 96.72131147540983)	3	19.1987	95.8158
AKT_04	Q6ZMY6	Single Protein	WILSASKDRTMR	2	NH2-WILSASK<ub>DRTM<ox>R-COOH	377	KK	LW	Oxidation of M (11), Ubiquitination of K (7)		Oxidation of M (11: 100.0), Ubiquitination of K (7: 100.0)	Oxidation of M (11: 65.53191489361703), Ubiquitination of K (7: 65.53191489361703)	19	56.2481	98.3193
AKT_04	P21333	Single Protein	AYGPGIEPTGNMVK	0	NH2-AYGPGIEPTGNM<ox>VK<ub>-COOH	286	AR	KR	Oxidation of M (12), Ubiquitination of K (14)		Oxidation of M (12: 100.0), Ubiquitination of K (14: 100.0)	Oxidation of M (12: 92.51012145748987), Ubiquitination of K (14: 92.51012145748987)	1	11.9826	88
AKT_04	Q8NEN0	Single Protein	FISGNLGFLNEMISK	0	NH2-FISGNLGFLNEM<ox>ISK<ub>-COOH	403	IK	GA	Oxidation of M (12), Ubiquitination of K (15)		Oxidation of M (12: 100.0), Ubiquitination of K (15: 100.0)	Oxidation of M (12: 100.0), Ubiquitination of K (15: 100.0)	4	100	100
AKT_04	P04083	Single Protein	IMVSRSEIDMNDIK	1	NH2-IM<ox>VSRSEIDMNDIK<ub>-COOH	299	IR	AF	Oxidation of M (2), Ubiquitination of K (14)		Oxidation of M (2: 99.99999999988061, 10: 0.0391822399193954), Ubiquitination of K (14: 100.0)	Oxidation of M (2: 52.33968804159446), Ubiquitination of K (14: 52.33968804159446)	8	17.5283	95.8158
AKT_04	P18206	Single Protein	TCKMLGQMTDQVADLR	1	NH2-TCK<ubq long k>M<ox>LGQMTDQVADLR-COOH	324	LG	AR	Oxidation of M (4), Ubiquitination long of K (3)		Oxidation of M (4: 99.99999999934754, 8: 3.5813962827815437E-6), Ubiquitination long of K (3: 100.0)	Oxidation of M (4: 100.0), Ubiquitination long of K (3: 100.0)	2	100	100
AKT_04	Q86YA3	Single Protein	GALMNGVTEIERSPLLEWLPTLCFYNVK	1	NH2-GALM<ox>NGVTEIERSPLLEWLPTLCFYNVK<ub>-COOH	1894	YK	GL	Oxidation of M (4), Ubiquitination of K (28)		Oxidation of M (4: 100.0), Ubiquitination of K (28: 100.0)	Oxidation of M (4: 95.29652351738241), Ubiquitination of K (28: 95.29652351738241)	4	25.7965	95
AKT_04	Q9NZN1	Single Protein	LLYPMESK	0	NH2-LLYPM<ox>ESK<ub>-COOH	244	PK	LT	Oxidation of M (5), Ubiquitination of K (8)		Oxidation of M (5: 100.0), Ubiquitination of K (8: 100.0)	Oxidation of M (5: 94.97991967871486), Ubiquitination of K (8: 94.97991967871486)	5	39.0722	99.1597
AKT_04	Q5T8P6	Single Protein	ELLDTELDLYK	0	pyro-ELLDTELDLYK<ub>-COOH	813	QK	KM	Pyrolidone from E (1), Ubiquitination of K (11)		Pyrolidone from E (0: 100.0), Ubiquitination of K (11: 100.0)	Pyrolidone from E (1: 71.34020618556701), Ubiquitination of K (11: 71.34020618556701)	4	16.8248	93.3609
AKT_04	Q12802	Single Protein	EALLAQREEEVQQGQQDLEKER	2	pyro-EALLAQREEEVQQGQQDLEK<ub>ER-COOH	2616	ER	EE	Pyrolidone from E (1), Ubiquitination of K (20)		Pyrolidone from E (0: 100.0), Ubiquitination of K (20: 100.0)	Pyrolidone from E (1: 93.43339587242026), Ubiquitination of K (20: 93.43339587242026)	6	51.0526	98.3193
AKT_04	Q9NXB0	Single Protein	QEILKLENSGGK	1	pyro-QEILK<ubq long k>LENSGGK<ubq long k>-COOH	109	YR	KN	Pyrolidone from Q (1), Ubiquitination long of K (12, 5)		Pyrolidone from Q (0: 100.0), Ubiquitination long of K (5: 100.0, 12: 100.0)	Pyrolidone from Q (1: 56.0553633217993), Ubiquitination long of K (5: 56.0553633217993, 12: 56.0553633217993)	7	18.3281	95.7983
AKT_04	P23352	Single Protein	KCCSNGCGHTCQVPK	1	NH2-K<ubq long k>CCSNGCGHTCQVPK<ubq long k>-COOH	162	VK	TL	Ubiquitination long of K (1, 15)		Ubiquitination long of K (1: 100.0, 15: 100.0)	Ubiquitination long of K (1: 44.44444444444444, 15: 44.44444444444444)	5	10.7787	80.9917
AKT_04	Q8NE71	Single Protein	ICIVGPNGVGK	0	NH2-ICIVGPNGVGK<ubq long k>-COOH	654	SR	ST	Ubiquitination long of K (11)		Ubiquitination long of K (11: 100.0)	Ubiquitination long of K (11: 47.61904761904761)	42	66.4695	99.9299
AKT_04	O94898	Single Protein	GETAVLQCIAGGSPAPRLNWTK	1	NH2-GETAVLQCIAGGSPAPRLNWTK<ubq long k>-COOH	710	TR	DD	Ubiquitination long of K (22)		Ubiquitination long of K (22: 100.0)	Ubiquitination long of K (22: 38.72340425531915)	7	10.2802	78.2423
AKT_04	O00292	Single Protein	ADMEKLVIPAHVR	1	NH2-ADMEK<ubq long k>LVIPAHVR-COOH	46	DR	AQ	Ubiquitination long of K (5)		Ubiquitination long of K (5: 100.0)	Ubiquitination long of K (5: 74.6506986027944)	2	10.2866	78.2423
AKT_04	Q9C0D0	Single Protein	RELEEKNILPR	2	NH2-RELEEK<ubq long k>NILPR-COOH	435	SK	QT	Ubiquitination long of K (6)		Ubiquitination long of K (6: 100.0)	Ubiquitination long of K (6: 69.42148760330579)	4	14.3595	90.0413
AKT_04	P04181	Single Protein	KTVQGPPTSDDIFER	1	NH2-K<ub>TVQGPPTSDDIFER-COOH	32	TK	EY	Ubiquitination of K (1)		Ubiquitination of K (1: 100.0)	Ubiquitination of K (1: 97.64453961456103)	2	28.5844	95.7983
AKT_04	Q9BZV1	Single Protein	KYNYTLLRVR	2	NH2-K<ub>YNYTLLRVR-COOH	333	LR	LP	Ubiquitination of K (1)		Ubiquitination of K (1: 100.0)	Ubiquitination of K (1: 65.53191489361703)	129	100	99.9822
AKT_04	P14314	Single Protein	KERESLQQMAEVTR	2	NH2-K<ub>ERESLQQMAEVTR-COOH	122	GR	EG	Ubiquitination of K (1)		Ubiquitination of K (1: 100.0)	Ubiquitination of K (1: 94.08396946564885)	1	11.5557	84
AKT_04	P10074	Single Protein	KGTAVPVECPTCHK	1	NH2-K<ub>GTAVPVECPTCHK<ub>-COOH	285	NR	KF	Ubiquitination of K (1, 14)		Ubiquitination of K (1: 100.0, 14: 100.0)	Ubiquitination of K (1: 99.61089494163424, 14: 99.61089494163424)	1	22.6245	97.541
AKT_04	P19623	Single Protein	YQDILVFRSK	1	NH2-YQDILVFRSK<ub>-COOH	48	SR	TY	Ubiquitination of K (10)		Ubiquitination of K (10: 100.0)	Ubiquitination of K (10: 94.08396946564885)	2	14.8489	91.6317
AKT_04	P19224	Single Protein	DTLNFFKESK	1	NH2-DTLNFFK<ub>ESK<ub>-COOH	134	DR	FD	Ubiquitination of K (10, 7)		Ubiquitination of K (7: 100.0, 10: 100.0)	Ubiquitination of K (7: 95.03105590062113, 10: 95.03105590062113)	3	19.42	95.8158
AKT_04	Q8NFY4	Single Protein	AVYSRVARICK	2	NH2-AVYSRVARICK<ub>-COOH	250	GK	ND	Ubiquitination of K (11)		Ubiquitination of K (11: 100.0)	Ubiquitination of K (11: 88.53754940711462)	2	12.445	89.716
AKT_04	Q9H175	Single Protein	ASGVHRIDAEEK	1	NH2-ASGVHRIDAEEK<ub>-COOH	189	LR	QE	Ubiquitination of K (12)		Ubiquitination of K (12: 100.0)	Ubiquitination of K (12: 97.36842105263158)	2	28.6763	95.7983
AKT_04	Q9NYL4	Single Protein	RAIIPSHLAYGK	1	NH2-RAIIPSHLAYGK<ub>-COOH	110	KR	RG	Ubiquitination of K (12)		Ubiquitination of K (12: 100.0)	Ubiquitination of K (12: 99.61013645224172)	2	40.1566	99.1597
AKT_04	P01031	Single Protein	KPLERVFQFLEK	1	NH2-K<ub>PLERVFQFLEK<ub>-COOH	618	AK	SD	Ubiquitination of K (12, 1)		Ubiquitination of K (1: 100.0, 12: 100.0)	Ubiquitination of K (1: 71.34020618556701, 12: 71.34020618556701)	7	19.9894	97.4895
AKT_04	P00338	Single Protein	ADELALVDVIEDKLKGEMMDLQHGSLFLR	2	NH2-ADELALVDVIEDK<ub>LK<ub>GEMMDLQHGSLFLR-COOH	45	DL	TP	Ubiquitination of K (13, 15)		Ubiquitination of K (13: 100.0, 15: 100.0)	Ubiquitination of K (13: 100.0, 15: 100.0)	2	100	100
AKT_04	Q8NBE8	Single Protein	IRSLIYNALNPMHK	1	NH2-IRSLIYNALNPMHK<ub>-COOH	252	NK	EI	Ubiquitination of K (14)		Ubiquitination of K (14: 100.0)	Ubiquitination of K (14: 90.61302681992338)	5	29.2442	95.8847
AKT_04	P20929	Single Protein	GIGWIPIGSLEVEK	0	NH2-GIGWIPIGSLEVEK<ub>-COOH	1446	LK	VK	Ubiquitination of K (14)		Ubiquitination of K (14: 100.0)	Ubiquitination of K (14: 95.29652351738241)	1	13.3356	87.9032
AKT_04	Q70CQ1	Single Protein	LRLAQDHSILNPQK	1	NH2-LRLAQDHSILNPQK<ub>-COOH	10	GR	WC	Ubiquitination of K (14)		Ubiquitination of K (14: 100.0)	Ubiquitination of K (14: 95.66929133858267)	2	26.6278	94.979
AKT_04	Q9ULP9	Single Protein	LSPFLAARHFNLPSK	1	NH2-LSPFLAARHFNLPSK<ub>-COOH	479	DR	TE	Ubiquitination of K (15)		Ubiquitination of K (15: 100.0)	Ubiquitination of K (15: 100.0)	1	100	100
AKT_04	Q8IVF5	Single Protein	YPHPGLADFADNLIK	0	NH2-YPHPGLADFADNLIK<ub>-COOH	1549	GK	ES	Ubiquitination of K (15)		Ubiquitination of K (15: 100.0)	Ubiquitination of K (15: 44.44444444444444)	6	15.6165	92.5
AKT_04	P51884	Single Protein	LHINHNNLTESVGPLPK	0	NH2-LHINHNNLTESVGPLPK<ub>-COOH	121	KK	SL	Ubiquitination of K (17)		Ubiquitination of K (17: 100.0)	Ubiquitination of K (17: 94.39999999999999)	1	14.0226	89.1667
AKT_04	O95696	Single Protein	GKPALVRR	1	NH2-GK<ub>PALVRR-COOH	876	GR	HT	Ubiquitination of K (2)		Ubiquitination of K (2: 100.0)	Ubiquitination of K (2: 95.03105590062113)	4	31.1485	95.8847
AKT_04	O75179	Single Protein	PDKEIDELIPK	1	NH2-PDK<ub>EIDELIPK<ub>-COOH	1796	KD	NR	Ubiquitination of K (3, 11)		Ubiquitination of K (3: 100.0, 11: 100.0)	Ubiquitination of K (3: 98.9539748953975, 11: 98.9539748953975)	6	69.6105	99.9298
AKT_04	P00973	Single Protein	GSMKTHFNTAQGFR	1	NH2-GSMK<ub>THFNTAQGFR-COOH	243	ER	TV	Ubiquitination of K (4)		Ubiquitination of K (4: 100.0)	Ubiquitination of K (4: 80.5500982318271)	3	10.8152	80.9917
AKT_04	Q5XKR4	Single Protein	LGMKDAAELLGHR	1	NH2-LGMK<ub>DAAELLGHR-COOH	12	AR	EA	Ubiquitination of K (4)		Ubiquitination of K (4: 100.0)	Ubiquitination of K (4: 93.48230912476723)	2	15.1686	91.7011
AKT_04	Q9NX20	Single Protein	REPKNLSDIR	2	NH2-REPK<ub>NLSDIR-COOH	64	VR	GP	Ubiquitination of K (4)		Ubiquitination of K (4: 100.0)	Ubiquitination of K (4: 65.53191489361703)	4	14.889	91.6317
AKT_04	P11388	Single Protein	DEDSLKTLR	1	NH2-DEDSLK<ub>TLR-COOH	524	YE	YG	Ubiquitination of K (6)		Ubiquitination of K (6: 100.0)	Ubiquitination of K (6: 96.45833333333333)	1	15.0515	91.6667
AKT_04	Q9C0D2	Single Protein	IQNLEKLYLASLRSMGEGHR	2	NH2-IQNLEK<ub>LYLASLRSMGEGHR-COOH	79	QK	QA	Ubiquitination of K (6)		Ubiquitination of K (6: 100.0)	Ubiquitination of K (6: 99.79423868312757)	15	100	99.929
AKT_04	Q9BXJ9	Single Protein	FLTPLKNLVK	1	NH2-FLTPLK<ub>NLVK<ub>-COOH	660	IK	NK	Ubiquitination of K (6, 10)		Ubiquitination of K (6: 100.0, 10: 100.0)	Ubiquitination of K (6: 40.476190476190474, 10: 40.476190476190474)	9	14.7353	91.1765
AKT_04	Q4KMP7	Single Protein	WLDVIEKDLHR	1	NH2-WLDVIEK<ub>DLHR-COOH	399	PK	QF	Ubiquitination of K (7)		Ubiquitination of K (7: 100.0)	Ubiquitination of K (7: 40.476190476190474)	5	10.4344	77.9167
AKT_04	Q9UKV8	Single Protein	EFGIMVKDEMTDVTGR	1	NH2-EFGIMVK<ub>DEMTDVTGR-COOH	396	VR	VL	Ubiquitination of K (7)		Ubiquitination of K (7: 100.0)	Ubiquitination of K (7: 94.08396946564885)	1	10.224	78.1513
AKT_04	Q13823	Single Protein	HLIFVLNK	0	NH2-HLIFVLNK<ub>-COOH	249	WK	CD	Ubiquitination of K (8)		Ubiquitination of K (8: 100.0)	Ubiquitination of K (8: 94.08396946564885)	4	28.4804	95.7983
AKT_04	A0AV96	Single Protein	LFIGGIPKMK	1	NH2-LFIGGIPK<ub>MK<ub>-COOH	153	CR	KR	Ubiquitination of K (8, 10)		Ubiquitination of K (8: 100.0, 10: 100.0)	Ubiquitination of K (8: 56.0553633217993, 10: 56.0553633217993)	3	10.4515	77.9167
AKT_04	Q8TD16	Single Protein	VLELQTELKQLR	1	NH2-VLELQTELK<ub>QLR-COOH	118	RK	NV	Ubiquitination of K (9)		Ubiquitination of K (9: 100.0)	Ubiquitination of K (9: 71.34020618556701)	3	12.7002	89.1211
AKT_04	Q9P1A6	Single Protein	YSPAPRSMK	1	NH2-YSPAPRSMK<ub>-COOH	73	ER	GL	Ubiquitination of K (9)		Ubiquitination of K (9: 100.0)	Ubiquitination of K (9: 94.08396946564885)	1	13.03	88.4298
AKT_04	Q8NCM8	Single Protein	LVYTPLTDK	0	NH2-LVYTPLTDK<ub>-COOH	1662	SK	CY	Ubiquitination of K (9)		Ubiquitination of K (9: 100.0)	Ubiquitination of K (9: 70.34883720930232)	5	23.2507	97.4998
AKT_04	P24928	Single Protein	RTLQEDLVK	1	NH2-RTLQEDLVK<ub>-COOH	932	LR	DV	Ubiquitination of K (9)		Ubiquitination of K (9: 100.0)	Ubiquitination of K (9: 95.29652351738241)	1	13.3356	87.9032
AKT_04	P98173	Single Protein	DSWVFVGAKGVQNKSPFEQHVK	2	NH2-DSWVFVGAK<ub>GVQNK<ub>SPFEQHVK<ub>-COOH	181	FR	NS	Ubiquitination of K (9, 14, 22)		Ubiquitination of K (9: 100.0, 14: 100.0, 22: 100.0)	Ubiquitination of K (9: 93.48230912476723, 14: 93.48230912476723, 22: 93.48230912476723)	1	11.726	85.8333
AKT_04	Q8N6C5	Single Protein	GSLLSDVLKIWVTDTFPK	1	NH2-GSLLSDVLK<ub>IWVTDTFPK<ub>-COOH	305	YR	TW	Ubiquitination of K (9, 18)		Ubiquitination of K (9: 100.0, 18: 100.0)	Ubiquitination of K (9: 96.85534591194968, 18: 96.85534591194968)	1	15.563	92.437
AKT_04	P0CG47	Unrelated Proteins	LIFAGKQLEDGR	1	NH2-LIFAGK<ubq long k>QLEDGR-COOH	43, 119, 195; 43, 119, 195, 271, 347, 423, 499, 575, 651; 43; 43	QR, QR, QR; QR, QR, QR, QR, QR, QR, QR, QR, QR; QR; QR	TL, TL, TL; TL, TL, TL, TL, TL, TL, TL, TL, TL; TL; TL	Ubiquitination long of K (6)		Ubiquitination long of K (6: 100.0)	Ubiquitination long of K (6: 99.59677419354838)	6	100	100
6	O15231	Single Protein	TANAGPPRPSSSGYKMTTEDYKK	2	NH2-TANAGPPRPSSSGYK<longub>MTTEDYK<ub>K<ub>-COOH	121	VR	LA	Long ubiquitination (15), Ubiquitination of K (22, 23)		Long ubiquitination (15: 99.9101739692177, 22: 0.04491301539115649, 23: 0.04491301539115649), Ubiquitination of K (15: 66.66666666666667, 22: 66.66666666666667, 23: 66.66666666666667)	Long ubiquitination (15: 51.403129724666364), Ubiquitination of K (22: 51.403129724666364, 23: 51.403129724666364)	1	5.71391	83.1932
37	Q15928	Related Proteins	VLNEHKKIHTGEKPYK	2	NH2-VLNEHK<ub>K<ub>IHTGEKPYK<ub>-COOH	381; 242	SR; ST	CE; CE	Ubiquitination of K (16, 6, 7)		Ubiquitination of K (6: 99.99993443276125, 7: 99.92576992700906, 13: 0.07436120746847528, 16: 99.99993443276125)	Ubiquitination of K (6: 36.40244751212937, 13: 30.777754450345736, 16: 64.4944896981313)	1	3.23352	65
95	Q5CZ79	Single Protein	DLSVATKQCVPEK	1	NH2-DLSVATK<ub>QC<cmm>VPEK<ub>-COOH	292	DK	VS	Carbamidomethylation of C (9), Ubiquitination of K (13, 7)		Carbamidomethylation of C (9: 100.0), Ubiquitination of K (7: 100.0, 13: 100.0)	Carbamidomethylation of C (9: 15.141351221849542), Ubiquitination of K (7: 15.141351221849542, 13: 15.141351221849542)	1	3.43153	65.6566
101	O75369	Single Protein	GEITGEVHMPSGKTATPEIVDNKDGTVTVR	2	NH2-GEITGEVHMPSGK<longub>TATPEIVDNK<ub>DGTVTVR-COOH	1758	RK	YA	Long ubiquitination (13), Ubiquitination of K (23)		Long ubiquitination (13: 99.906564866118, 23: 0.09343513388200227), Ubiquitination of K (13: 50.0, 23: 50.0)	Long ubiquitination (13: 54.767609008145655), Ubiquitination of K (23: 54.767609008145655)	1	5.2223	79.798
106	O15018	Single Protein	GKAKVNSEAPAANAVK	2	NH2-GK<ub>AK<ub>VNSEAPAANAVK-COOH	1892	LK	AG	Ubiquitination of K (4, 2)		Ubiquitination of K (2: 99.99999999996454, 4: 99.99997732290919, 16: 2.267712629758895E-5)	Ubiquitination of K (2: 10.301868711068519, 4: 10.301868711068519)	1	3.05395	63.7584
149	Q9HBF4	Single Protein	KSMNHGKEGVPHEAK	2	NH2-K<longub>SM<ox>NHGK<ub>EGVPHEAK<longub>-COOH	442	CK	SR	Long ubiquitination (1, 15), Oxidation of M (3), Ubiquitination of K (7)		Long ubiquitination (1: 99.99995868454597, 7: 0.057133075078561364, 15: 99.94290824037549), Oxidation of M (3: 100.0), Ubiquitination of K (1: 3.130823586241873E-5, 7: 99.9502681512679, 15: 0.04970054049623354)	Long ubiquitination (1: 82.17537134643028, 15: 82.17537134643028), Oxidation of M (3: 82.17537134643028), Ubiquitination of K (7: 82.17537134643028)	1	5.42125	81.1448
178	O75462	Single Protein	VGGLEDQLSVRWVSPPALK	1	NH2-VGGLEDQLSVRWVSPPALK<ub>-COOH	246	SR	DF	Ubiquitination of K (19)		Ubiquitination of K (19: 100.0)	Ubiquitination of K (19: 94.58552946813607)	1	6.60674	87.0432
213	P21283	Single Protein	QSLKNISEIIAKGVTQIDNDLK	2	NH2-QSLK<ub>NISEIIAK<ub>GVTQIDNDLK-COOH	116	IK	SR	Ubiquitination of K (4, 12)		Ubiquitination of K (4: 99.99992055448807, 12: 99.99992055448807, 22: 1.588910238803164E-4)	Ubiquitination of K (4: 68.6152371825587, 12: 68.6152371825587)	1	3.53708	66.113
226	Q9Y2K6	Single Protein	LNKAFQAEESPGVIYCISMQWFR	1	NH2-LNK<ub>AFQAEESPGVIYCISMQWFR-COOH	804	IK	EW	Ubiquitination of K (3)		Ubiquitination of K (3: 100.0)	Ubiquitination of K (3: 76.1379971250599)	1	3.70581	67.7741
228	Q6A162	Single Protein	SDLEAHVESLKEDLLCLK	1	NH2-SDLEAHVESLK<ub>EDLLCLK-COOH	207	CK	KN	Ubiquitination of K (11)		Ubiquitination of K (11: 99.91204514456207, 18: 0.0879548554379301)	Ubiquitination of K (11: 56.82798275035936)	1	3.62364	65.8784
232	O75881	Single Protein	KDPLRFMK	2	NH2-KDPLRFMK<longub>-COOH	64	LR	TL	Long ubiquitination (8)		Long ubiquitination (1: 4.074848343165871E-14, 8: 99.99999999999996)	Long ubiquitination (8: 58.50503114518448)	1	3.01901	62.8378
234	Q14651	Single Protein	IENCNYAVELGKNKAK	2	NH2-IENC<cmm>NYAVELGK<ub>NK<ub>AK-COOH	458	KK	FS	Carbamidomethylation of C (4), Ubiquitination of K (12, 14)		Carbamidomethylation of C (4: 100.0), Ubiquitination of K (12: 66.66666666666667, 14: 66.66666666666667, 16: 66.66666666666667)	Carbamidomethylation of C (4: 25.011978917105893)	1	6.00184	86.2876
245	O95925	Single Protein	ANCLNTCKNKR	2	NH2-ANCLNTC<cmm>K<ub>NK<longub>R-COOH	121	SK	FP	Carbamidomethylation of C (7), Long ubiquitination (10), Ubiquitination of K (8)		Carbamidomethylation of C (3: 2.895903243903239E-9, 7: 99.99999999999646), Long ubiquitination (8: 50.0, 10: 50.0), Ubiquitination of K (8: 50.0, 10: 50.0)	Carbamidomethylation of C (7: 10.633484162895924)	2	5.91247	85.2347
255	Q5TAA0	Single Protein	CLRIKGEDANAAACFK	2	NH2-C<cmm>LRIKGEDANAAAC<cmm>FK<ub>-COOH	441	GK	RA	Carbamidomethylation of C (1, 14), Ubiquitination of K (16)		Carbamidomethylation of C (1: 100.0, 14: 100.0), Ubiquitination of K (5: 1.8942998698036195E-9, 16: 99.99999999810571)	Carbamidomethylation of C (1: 92.14183037853378, 14: 92.14183037853378), Ubiquitination of K (16: 92.14183037853378)	1	6.33643	87.2483
256	Q9Y5K5	Single Protein	FNLMAIVSDRKMIYEQK	2	NH2-FNLM<ox>AIVSDRK<longub>MIYEQK-COOH	218	IR	IA	Long ubiquitination (11), Oxidation of M (4)		Long ubiquitination (11: 99.99996807265619, 17: 3.192734380839372E-5), Oxidation of M (4: 99.99999997786182, 12: 2.213818622440689E-8)	Long ubiquitination (11: 78.41399137517968), Oxidation of M (4: 87.49401054144705)	1	6.15911	86.9346
259	Q13867	Single Protein	EHVKPLFNMEDKICLVNDPRPQHK	1	NH2-EHVKPLFNMEDKICLVNDPRPQHK<ub>-COOH	256	YR	YN	Ubiquitination of K (24)		Ubiquitination of K (4: 1.4541138836727534E-9, 12: 4.775652440079207E-6, 24: 99.99999522289345)	Ubiquitination of K (24: 81.34993975229446)	1	7.35521	88.2943
276	Q9P267	Single Protein	VFNFDPGAAVKQRTAEDVK	2	NH2-VFNFDPGAAVK<ub>QRTAEDVK<ub>-COOH	73	PK	AD	Ubiquitination of K (11, 19)		Ubiquitination of K (11: 100.0, 19: 100.0)	Ubiquitination of K (11: 55.15093435553426, 19: 55.15093435553426)	1	2.93267	57.9125
304	O60443	Single Protein	NEVLCVLTQKITTMQK	1	NH2-NEVLC<cmm>VLTQK<ub>ITTM<ox>QK-COOH	152	GR	CV	Carbamidomethylation of C (5), Oxidation of M (14), Ubiquitination of K (10)		Carbamidomethylation of C (5: 100.0), Oxidation of M (14: 100.0), Ubiquitination of K (10: 99.95358348627393, 16: 0.04641651372606594)	Carbamidomethylation of C (5: 74.70052707235266), Oxidation of M (14: 74.70052707235266), Ubiquitination of K (10: 64.20196523150894)	1	6.68301	86.8687
326	Q9BRA2	Single Protein	HISEGCVFIYCQVGEKPYWKDPNNDFRK	2	NH2-HISEGC<cmm>VFIYC<cmm>QVGEKPYWKDPNNDFRK<ub>-COOH	59	LK	NL	Carbamidomethylation of C (6, 11), Ubiquitination of K (28)		Carbamidomethylation of C (6: 100.0, 11: 100.0), Ubiquitination of K (16: 0.04990154356805832, 20: 2.9259565810699206E-5, 28: 99.95006919686614)	Carbamidomethylation of C (6: 84.85864877815045, 11: 84.85864877815045), Ubiquitination of K (28: 75.01093304210985)	1	6.15911	86.9346
328	P28799	Single Protein	CAARGTKCLR	2	NH2-CAARGTK<ub>C<cmm>LR-COOH	565	FR	RE	Carbamidomethylation of C (8), Ubiquitination of K (7)		Carbamidomethylation of C (1: 50.0, 8: 50.0), Ubiquitination of K (7: 100.0)	Carbamidomethylation of C (8: 2.896302316168997), Ubiquitination of K (7: 13.751796837565887)	1	3.23838	64.7259
369	Q8NAA4	Single Protein	VGEAQSKETLSGHK	1	NH2-VGEAQSK<longub>ETLSGHK-COOH	409	WK	DK	Long ubiquitination (7)		Long ubiquitination (7: 99.97815506378114, 14: 0.021844936218857615)	Long ubiquitination (7: 12.74556780067082)	1	3.13867	64.6465
379	Q8IYT3	Single Protein	NMIEVVTSEMKTLK	1	NH2-NMIEVVTSEMK<ub>TLK<ub>-COOH	624	AR	KS	Ubiquitination of K (14, 11)		Ubiquitination of K (11: 100.0, 14: 100.0)	Ubiquitination of K (11: 10.949330227140363, 14: 10.949330227140363)	1	2.96751	60.6667
397	Q6PJW8	Single Protein	WKTVQPHTVTALR	1	NH2-WK<ub>TVQPHTVTALR-COOH	238	TK	NS	Ubiquitination of K (2)		Ubiquitination of K (2: 100.0)	Ubiquitination of K (2: 10.253953042644948)	1	3.12119	63.6364
402	Q0VF49	Single Protein	QQQEEFRRK	2	NH2-QQQEEFRRK<ub>-COOH	1073	AR	LR	Ubiquitination of K (9)		Ubiquitination of K (9: 100.0)	Ubiquitination of K (9: 15.285098227120264)	1	3.35184	65.6766
408	Q9UK59	Single Protein	NIEVYKLKQLK	2	NH2-NIEVYK<ub>LK<ub>QLK-COOH	155	VR	QP	Ubiquitination of K (8, 6)		Ubiquitination of K (6: 99.99990430274994, 8: 99.99990430274994, 11: 1.9139450011413563E-4)	Ubiquitination of K (6: 10.206037374221367, 8: 10.206037374221367)	1	3.12119	63.6364
409	Q96M89	Single Protein	HENALSKIKGVEEEVLTR	2	NH2-HENALSK<ub>IKGVEEEVLTR-COOH	222	FR	FQ	Ubiquitination of K (7)		Ubiquitination of K (7: 50.0, 9: 50.0)		2	7.67686	88.4106
414	O75031	Single Protein	KEQELEQLKMDCEHFK	2	NH2-K<ub>EQELEQLK<longub>M<ox>DC<cmm>EHFK<longub>-COOH	67	ER	AR	Carbamidomethylation of C (12), Long ubiquitination (16, 9), Oxidation of M (10), Ubiquitination of K (1)		Carbamidomethylation of C (12: 100.0), Long ubiquitination (1: 7.291241089036823E-14, 9: 99.99999999999993, 16: 100.0), Oxidation of M (10: 100.0), Ubiquitination of K (1: 99.9999999999991, 9: 9.028401629059727E-13, 16: 2.708300326411215E-17)	Carbamidomethylation of C (12: 74.55678006708193), Long ubiquitination (9: 74.55678006708193, 16: 74.55678006708193), Oxidation of M (10: 74.55678006708193), Ubiquitination of K (1: 74.55678006708193)	1	3.48305	65.6566
419	Q96C92	Single Protein	RAVKAENHVVK	2	NH2-RAVKAENHVVK<ub>-COOH	337	TK	LK	Ubiquitination of K (11)		Ubiquitination of K (4: 3.837863155715972E-7, 11: 99.99999961621369)	Ubiquitination of K (11: 65.50071873502635)	1	3.23352	65
437	Q9P2W1	Single Protein	EHGLGKAVVVK	1	NH2-EHGLGK<ub>AVVVK<ub>-COOH	39	QR	TL	Ubiquitination of K (6, 11)		Ubiquitination of K (6: 100.0, 11: 100.0)	Ubiquitination of K (6: 14.518447532343082, 11: 14.518447532343082)	1	3.46998	65.6566
445	Q96RW7	Single Protein	CICPPGQHLLGDGKSCAGLER	1	NH2-C<cmm>ICPPGQHLLGDGK<longub>SCAGLER-COOH	5339	FK	LP	Carbamidomethylation of C (1), Long ubiquitination (14)		Carbamidomethylation of C (1: 49.99986523715281, 3: 49.99986523715281, 16: 2.695256943755441E-4), Long ubiquitination (14: 100.0)	Long ubiquitination (14: 74.55678006708193)	1	3.48305	65.6566
447	Q9P0L0	Single Protein	QDGPMPKPHSVSLNDTETRKLMEECK	2	NH2-QDGPMPKPHSVSLNDTETRKLM<ox>EEC<cmm>K<ub>-COOH	155	SK	RL	Carbamidomethylation of C (25), Oxidation of M (22), Ubiquitination of K (26)		Carbamidomethylation of C (25: 100.0), Oxidation of M (5: 2.4530910359778682E-11, 22: 99.99999999997547), Ubiquitination of K (7: 7.021653872357147E-23, 20: 3.032250850410125E-8, 26: 99.99999996967749)	Carbamidomethylation of C (25: 95.59175850503114), Oxidation of M (22: 95.59175850503114), Ubiquitination of K (26: 23.50263536176329)	1	12.3436	97.3684
452	Q93033	Single Protein	ERASQGELQVSK	1	NH2-ERASQGELQVSK<longub>-COOH	343	YK	LG	Long ubiquitination (12)		Long ubiquitination (12: 100.0)	Long ubiquitination (12: 12.601820795400098)	1	3.11754	63.878
471	Q8IWA6	Single Protein	KAPSILSVLKQNK	2	NH2-K<ub>APSILSVLKQNK-COOH	320	QR	SN	Ubiquitination of K (1)		Ubiquitination of K (1: 99.9999865991936, 10: 1.3400793533949395E-5, 13: 1.2863756893399786E-11)	Ubiquitination of K (1: 23.814087206516533)	1	5.70397	81.8182
473	Q6ZXV5	Single Protein	HKLALFNSAIVMQESGEVKLRPEAR	2	NH2-HK<ub>LALFNSAIVM<ox>QESGEVK<ub>LRPEAR-COOH	631	PK	KR	Oxidation of M (12), Ubiquitination of K (2, 19)		Oxidation of M (12: 100.0), Ubiquitination of K (2: 100.0, 19: 100.0)	Oxidation of M (12: 98.22712026832774), Ubiquitination of K (2: 98.22712026832774, 19: 98.22712026832774)	1	14.4521	98.8304
475	O94991	Single Protein	LWVEQLKVGVLVDEVICK	1	NH2-LWVEQLK<ub>VGVLVDEVIC<cmm>K-COOH	576	MK	AP	Carbamidomethylation of C (17), Ubiquitination of K (7)		Carbamidomethylation of C (17: 100.0), Ubiquitination of K (7: 99.93468656330387, 18: 0.06531343669613118)	Carbamidomethylation of C (17: 69.90896022999522), Ubiquitination of K (7: 69.90896022999522)	1	3.67687	66.6667
486	H3BQB6	Single Protein	DFTMKDIEEKMEAAEER	2	NH2-DFTM<ox>K<ub>DIEEK<ub>M<ox>EAAEER-COOH	163	VK	RK	Oxidation of M (11, 4), Ubiquitination of K (10, 5)		Oxidation of M (4: 100.0, 11: 100.0), Ubiquitination of K (5: 100.0, 10: 100.0)	Oxidation of M (4: 75.61092477240058, 11: 75.61092477240058), Ubiquitination of K (5: 75.61092477240058, 10: 75.61092477240058)	1	3.57079	66
502	Q6ZT98	Single Protein	GPKPLCSMPESTEIMKRPK	1	NH2-GPK<ub>PLC<cmm>SMPESTEIM<ox>KRPK-COOH	527	TR	YC	Carbamidomethylation of C (6), Oxidation of M (15), Ubiquitination of K (3)		Carbamidomethylation of C (6: 100.0), Oxidation of M (8: 1.369577914838265E-5, 15: 99.99998630422085), Ubiquitination of K (3: 99.99999999999251, 16: 3.751019825881857E-12, 19: 3.751019825881857E-12)	Carbamidomethylation of C (6: 97.07714422616196), Oxidation of M (15: 83.89401862692898), Ubiquitination of K (3: 97.07714422616196)	1	12.3436	97.3684
525	Q9Y2P4	Single Protein	HQLVEDGFNPLKISEPLYFMDNLKK	2	NH2-HQLVEDGFNPLK<ub>ISEPLYFM<ox>DNLKK<ub>-COOH	575	LK	SY	Oxidation of M (20), Ubiquitination of K (12, 25)		Oxidation of M (20: 100.0), Ubiquitination of K (12: 99.88572098156149, 24: 0.2285580368770202, 25: 99.88572098156149)	Oxidation of M (20: 93.91471011020603), Ubiquitination of K (24: 78.60199031487899, 25: 78.60199031487899)	1	8.85907	89.5623
526	O75820	Single Protein	IHTGERPYLCRQCGKSFSQLCNLIR	2	NH2-IHTGERPYLCRQCGK<longub>SFSQLC<cmm>NLIR-COOH	505	QR	HQ	Carbamidomethylation of C (21), Long ubiquitination (15)		Carbamidomethylation of C (10: 0.26883300835360174, 13: 0.26883300835360174, 21: 99.4623339832928), Long ubiquitination (15: 100.0)	Carbamidomethylation of C (21: 36.75131768088165), Long ubiquitination (15: 83.37326305701964)	1	5.70154	80.1347
538	Q8WXI7	Single Protein	ESISSLSPKLR	1	NH2-ESISSLSPK<ub>LR-COOH	7239	QK	ET	Ubiquitination of K (9)		Ubiquitination of K (9: 100.0)	Ubiquitination of K (9: 16.482989937709636)	1	4.03449	72.5166
551	Q5SRE5	Single Protein	VKANKDVASPLK	2	NH2-VK<ub>ANKDVASPLK-COOH	61	EK	EL	Ubiquitination of K (2)		Ubiquitination of K (2: 99.9970840795114, 5: 0.002915920482551392, 12: 6.058209844316887E-12)	Ubiquitination of K (2: 42.85720028244059)	1	14.0937	98.9189
555	Q9NZ72	Single Protein	KDTSLEELQKR	2	NH2-K<ub>DTSLEELQKR-COOH	78	KK	LE	Ubiquitination of K (1)		Ubiquitination of K (1: 100.0, 10: 4.9600398288270754E-18)	Ubiquitination of K (1: 27.886919022520363)	1	7.72547	88.3721
601	Q9NZN8	Single Protein	MVRTDGHTLSEK	1	NH2-M<ox>VRTDGHTLSEK<longub>-COOH	1		RN	Long ubiquitination (12), Oxidation of M (1)		Long ubiquitination (12: 100.0), Oxidation of M (1: 100.0)	Long ubiquitination (12: 71.58600862482032), Oxidation of M (1: 71.58600862482032)	1	5.48326	79.7297
606	Q8WTZ3	Single Protein	FYKCEECGKVFFFFLK	2	NH2-FYKC<cmm>EEC<cmm>GK<longub>VFFFFLK-COOH	82	EK	WS	Carbamidomethylation of C (4, 7), Long ubiquitination (9)		Carbamidomethylation of C (4: 100.0, 7: 100.0), Long ubiquitination (3: 6.205498076801948E-5, 9: 99.93215385359116, 16: 0.06778409142806277)	Carbamidomethylation of C (4: 93.57930043124102, 7: 93.57930043124102), Long ubiquitination (9: 93.57930043124102)	1	8.43155	89.5238
609	P06744	Single Protein	KGLHHKILLANFLAQTEALMR	2	NH2-K<longub>GLHHK<ub>ILLANFLAQTEALMR-COOH	418	IR	GK	Long ubiquitination (1), Ubiquitination of K (6)		Long ubiquitination (1: 99.95883833865346, 6: 0.04116166134652344), Ubiquitination of K (1: 50.0, 6: 50.0)	Long ubiquitination (1: 60.103739948850134), Ubiquitination of K (6: 60.103739948850134)	1	6.07942	86.711
615	Q5VST9	Single Protein	HVASKDAGVYTCLAQNTGGQVLCK	1	NH2-HVASK<longub>DAGVYTCLAQNTGGQVLCK<ub>-COOH	6418	LR	AE	Long ubiquitination (5), Ubiquitination of K (24)		Long ubiquitination (5: 99.89404308470078, 24: 0.10595691529920535), Ubiquitination of K (5: 1.6116812997523212E-7, 24: 99.99999983883187)	Long ubiquitination (5: 79.30043124101581), Ubiquitination of K (24: 79.30043124101581)	1	4.3982	75.9259
618	O14639	Single Protein	QHAALAAQSKSSEDIIKFSK	2	NH2-QHAALAAQSK<ub>SSEDIIKFSK<ub>-COOH	530	YK	FP	Ubiquitination of K (20, 10)		Ubiquitination of K (10: 99.98261455790787, 17: 0.01738902083505336, 20: 99.99999642125711)	Ubiquitination of K (10: 44.7719894098563, 17: 14.050684027176407)	1	3.28885	64.8829
641	Q15717	Single Protein	TIKVSYARPSSEVIKDANLYISGLPR	2	NH2-TIK<longub>VSYARPSSEVIK<longub>DANLYISGLPR-COOH	90	SK	TM	Long ubiquitination (3, 15)		Long ubiquitination (3: 100.0, 15: 100.0)	Long ubiquitination (3: 98.94585529468137, 15: 98.94585529468137)	1	16.4933	98.0099
644	Q400G9	Single Protein	KVLGDKFSSLR	2	NH2-K<ub>VLGDKFSSLR-COOH	465	LR	RK	Ubiquitination of K (1)		Ubiquitination of K (1: 99.97832975241157, 6: 0.021670247588434367)	Ubiquitination of K (1: 53.71346430282702)	1	14.0937	98.9189
650	Q6ZS30	Single Protein	ELVNDVILPKWAKSAEDFIYK	2	NH2-ELVNDVILPK<longub>WAK<ub>SAEDFIYK<ub>-COOH	2181	SK	HR	Long ubiquitination (10), Ubiquitination of K (21, 13)		Long ubiquitination (10: 99.86442523436435, 13: 0.1355747646117994, 21: 1.0238375286591167E-9), Ubiquitination of K (10: 0.13249827330127703, 13: 99.86750211819964, 21: 99.99999960849908)	Long ubiquitination (10: 47.78775931541694), Ubiquitination of K (13: 47.78775931541694, 21: 81.69621466219455)	1	5.2223	79.798
653	Q12923	Single Protein	RQEEELMQLQAKMALR	2	NH2-RQEEELMQLQAK<ub>MALR-COOH	482	LK	QS	Ubiquitination of K (12)		Ubiquitination of K (12: 100.0)	Ubiquitination of K (12: 22.328701485385714)	5	4.01563	72.5619
673	P23588	Single Protein	DSDKTDTDWRARPATDSFDDYPPR	2	NH2-DSDK<longub>TDTDWRARPATDSFDDYPPR-COOH	191	NR	RG	Long ubiquitination (4)		Long ubiquitination (4: 100.0)	Long ubiquitination (4: 89.79396262577863)	1	6.95092	88.0197
685	Q8IYJ2	Single Protein	QFAVLADTSFNYIKVKPLLVQSR	1	NH2-QFAVLADTSFNYIK<longub>VKPLLVQSR-COOH	467	FR	TT	Long ubiquitination (14)		Long ubiquitination (14: 50.0, 16: 50.0)		1	5.35392	79.8319
689	Q9Y4Y9	Single Protein	CIGSRIHIVMKSDK	2	NH2-C<cmm>IGSRIHIVM<ox>KSDK<ub>-COOH	21	DK	EI	Carbamidomethylation of C (1), Oxidation of M (10), Ubiquitination of K (14)		Carbamidomethylation of C (1: 100.0), Oxidation of M (10: 100.0), Ubiquitination of K (11: 0.028051529602953543, 14: 99.98673887670044)	Carbamidomethylation of C (1: 39.72208912314327), Oxidation of M (10: 39.72208912314327)	2	3.72661	67.2241
691	Q8N326	Single Protein	HMPMGNNAGNLEPEKR	1	NH2-HMPM<ox>GNNAGNLEPEK<ub>R-COOH	24	VK	KA	Oxidation of M (4), Ubiquitination of K (15)		Oxidation of M (2: 1.7311795350122484E-5, 4: 99.99998268820465), Ubiquitination of K (15: 100.0)	Oxidation of M (4: 65.64446574029708), Ubiquitination of K (15: 65.64446574029708)	1	3.25189	64.628
697	Q9BXD5	Single Protein	IRAEELLDGILDKIPTFQGLK	2	NH2-IRAEELLDGILDK<longub>IPTFQGLK<longub>-COOH	153	VK	FS	Long ubiquitination (13, 21)		Long ubiquitination (13: 100.0, 21: 100.0)	Long ubiquitination (13: 85.96070915189267, 21: 85.96070915189267)	1	5.70154	80.1347
709	P0CG47	Related and Unrelated Proteins	LIFAGKQLEDGR	1	NH2-LIFAGK<ub>QLEDGR-COOH	43, 119, 195; 43, 119, 195, 271, 347, 423, 499, 575, 651; 43; 43	QR, QR, QR; QR, QR, QR, QR, QR, QR, QR, QR, QR; QR; QR	TL, TL, TL; TL, TL, TL, TL, TL, TL, TL, TL, TL; TL; TL	Ubiquitination of K (6)		Ubiquitination of K (6: 100.0)	Ubiquitination of K (6: 99.90416866315284)	3	100	100
715	P02538	Related Proteins	KYEDEINKR	2	NH2-K<ub>YEDEINKR-COOH	252; 252; 269; 178; 289; 257; 267; 252; 272; 253	KN; KN; RN; KN; KK; KN; KK; KN; KK; KS	TA; TA; TN; TE; TA; TT; TA; TA; TA; TG	Ubiquitination of K (1)		Ubiquitination of K (1: 99.99999999999876, 8: 1.2306638947719832E-12)	Ubiquitination of K (1: 22.04120747484427)	1	5.70397	81.8182
732	P20585	Single Protein	RKPASGGLAASSSAPAR	1	NH2-RK<ub>PASGGLAASSSAPAR-COOH	4	SR	QA	Ubiquitination of K (2)		Ubiquitination of K (2: 100.0)	Ubiquitination of K (2: 21.9932918064207)	1	4.03449	72.5166
745	Q8NHG8	Single Protein	ITYNEDVLSK	0	NH2-ITYNEDVLSK<ub>-COOH	185	PR	DA	Ubiquitination of K (10)		Ubiquitination of K (10: 100.0)	Ubiquitination of K (10: 15.141351221849542)	1	3.19672	64.8814
760	Q9NU02	Single Protein	RQDGGPPYYMIETYKNVTDSSR	2	NH2-RQDGGPPYYM<ox>IETYK<ub>NVTDSSR-COOH	446	PR	FN	Oxidation of M (10), Ubiquitination of K (15)		Oxidation of M (10: 100.0), Ubiquitination of K (15: 100.0)	Oxidation of M (10: 96.4063248682319), Ubiquitination of K (15: 96.4063248682319)	1	12.0218	96.633
771	P78536	Single Protein	RADPDPMKNTCK	2	NH2-RADPDPM<ox>KNTC<cmm>K<longub>-COOH	215	KR	LL	Carbamidomethylation of C (11), Long ubiquitination (12), Oxidation of M (7)		Carbamidomethylation of C (11: 100.0), Long ubiquitination (8: 0.026117960991427273, 12: 99.97388203900857), Oxidation of M (7: 100.0)	Carbamidomethylation of C (11: 21.274556780067076), Long ubiquitination (12: 21.274556780067076), Oxidation of M (7: 21.274556780067076)	1	5.24763	79.798
836	Q8NFH8	Single Protein	IESIKCELPLPR	1	NH2-IESIK<longub>CELPLPR-COOH	127	VR	FM	Long ubiquitination (5)		Long ubiquitination (5: 100.0)	Long ubiquitination (5: 18.639195016770483)	1	4.9438	79.7297
846	Q9ULM3	Single Protein	TPTKMTTSQKVTFCSHGNSAFQPIASSCK	2	NH2-TPTKMTTSQKVTFCSHGNSAFQPIASSCK<longub>-COOH	407	ER	IV	Long ubiquitination (29)		Long ubiquitination (4: 5.836191501232192E-9, 10: 0.31486511583672844, 29: 99.9995226640925)	Long ubiquitination (29: 73.09283695212247)	2	8.25037	89.3822
864	P13591	Single Protein	AGPGAKGKDMEEGK	2	NH2-AGPGAK<longub>GK<longub>DMEEGK-COOH	763	GK	AA	Long ubiquitination (8, 6)		Long ubiquitination (6: 99.99999311258574, 8: 99.97775275357202, 14: 0.02225413384219084)	Long ubiquitination (6: 10.902896081771718, 8: 10.902896081771718)	1	2.9699	60.7969
901	Q03001	Single Protein	AREGLEKMVAEDNER	2	NH2-AREGLEK<ub>M<ox>VAEDNER-COOH	5794	WR	YR	Oxidation of M (8), Ubiquitination of K (7)		Oxidation of M (8: 100.0), Ubiquitination of K (7: 100.0)	Oxidation of M (8: 27.934834690943944), Ubiquitination of K (7: 27.934834690943944)	1	7.10399	87.9195
910	Q8TDU5	Single Protein	VMRGVSICTTCLLSVLQAITISPSTSFLEK	1	NH2-VMRGVSIC<cmm>TTCLLSVLQAITISPSTSFLEK<longub>-COOH	95	NR	FK	Carbamidomethylation of C (8), Long ubiquitination (30)		Carbamidomethylation of C (8: 99.95851917996862, 11: 50.0), Long ubiquitination (30: 100.0)	Carbamidomethylation of C (8: 34.07848016828828), Long ubiquitination (30: 90.51269765213225)	2	8.97269	90.1899
927	Q6P2I3	Related Proteins	GDEVQCEIEELGVIINK	0	NH2-GDEVQCEIEELGVIINK<ub>-COOH	296; 296	KK; KK	VV; VV	Ubiquitination of K (17)		Ubiquitination of K (17: 100.0)	Ubiquitination of K (17: 83.85241974125539)	5	19.4759	98.8338
933	O95678	Single Protein	EYQELMNIKLALDVEIATYR	1	NH2-EYQELMNIK<ub>LALDVEIATYR-COOH	433	LR	KL	Ubiquitination of K (9)		Ubiquitination of K (9: 100.0)	Ubiquitination of K (9: 99.52084331576425)	1	20.4727	98.6755
954	Q96M60	Single Protein	WSCTLKKIK	2	NH2-WSCTLK<ub>K<ub>IK-COOH	50	DK	ED	Ubiquitination of K (6, 7)		Ubiquitination of K (6: 66.66666666666667, 7: 66.66666666666667, 9: 66.66666666666667)	Ubiquitination of K (6: 10.896309314586993, 7: 10.896309314586993)	1	2.96665	60.6667
960	O95342	Single Protein	AYAKAGVVADEVISSMR	1	NH2-AYAK<ub>AGVVADEVISSM<ox>R-COOH	273	LK	TV	Oxidation of M (16), Ubiquitination of K (4)		Oxidation of M (16: 100.0), Ubiquitination of K (4: 100.0)	Oxidation of M (16: 66.45903210349783), Ubiquitination of K (4: 66.45903210349783)	1	4.42522	76.0943
981	Q86VI3	Single Protein	EGKAAQTERVLR	2	NH2-EGK<ub>AAQTERVLR-COOH	622	IK	NP	Ubiquitination of K (3)		Ubiquitination of K (3: 100.0)	Ubiquitination of K (3: 10.39770004791567)	1	2.98663	61.7445
982	O60814	Related Proteins	QVHPDTGISSKAMGIMNSFVNDIFER	1	NH2-QVHPDTGISSK<ub>AMGIMNSFVNDIFER-COOH	48; 48; 48; 48; 48; 48; 48; 48; 48; 48; 48; 48; 48; 48	LK; LK; LK; LK; LK; LK; LK; LK; LK; LK; LK; LK; LK; LK	IA; IA; IA; IA; IA; IA; IA; IA; IA; IA; IA; IA; IA; IA	Ubiquitination of K (11)		Ubiquitination of K (11: 100.0)	Ubiquitination of K (11: 93.53138476281744)	1	8.43155	89.5238
989	P01031	Single Protein	FWKDNLQHKDSSVPNTGTAR	2	NH2-FWKDNLQHK<longub>DSSVPNTGTAR-COOH	1227	YR	MV	Long ubiquitination (9)		Long ubiquitination (3: 50.0, 9: 50.0)	Long ubiquitination (9: 30.684139729990832)	1	2.93267	57.9125
1002	Q9H6L5	Single Protein	EKSHKDDSELDFSALCPK	2	NH2-EK<ub>SHK<ub>DDSELDFSALCPK<ub>-COOH	274	DK	IS	Ubiquitination of K (5, 2, 18)		Ubiquitination of K (2: 100.0, 5: 100.0, 18: 100.0)	Ubiquitination of K (2: 67.36942980354577, 5: 67.36942980354577, 18: 67.36942980354577)	1	3.40166	65
1006	O43556	Single Protein	VPLPINDLKEGVYVMVGADVPFSSCLR	1	NH2-VPLPINDLK<ub>EGVYVMVGADVPFSSC<cmm>LR-COOH	211	GR	EV	Carbamidomethylation of C (25), Ubiquitination of K (9)		Carbamidomethylation of C (25: 100.0), Ubiquitination of K (9: 100.0)	Carbamidomethylation of C (25: 70.53186391950167), Ubiquitination of K (9: 70.53186391950167)	1	3.73818	67.2241
1012	Q9BYX4	Single Protein	KEFQPFLKK	2	NH2-KEFQPFLK<ub>K<ub>-COOH	375	FR	WY	Ubiquitination of K (8, 9)		Ubiquitination of K (1: 2.6580292253652533E-18, 8: 100.0, 9: 100.0)	Ubiquitination of K (8: 33.15764254911356, 9: 33.15764254911356)	1	9.29419	91.2458
1020	Q9P2D1	Single Protein	GVEVGADTGSKSISEK	1	NH2-GVEVGADTGSK<ub>SISEK-COOH	2220	LK	GS	Ubiquitination of K (11)		Ubiquitination of K (11: 99.97773036488542, 16: 0.02226963511457622)	Ubiquitination of K (11: 11.260182079540005)	1	3.0103	61.4094
1026	Q9UIS9	Single Protein	RQVGPQSGEVRK	2	NH2-RQVGPQSGEVRK<ub>-COOH	98	RK	EA	Ubiquitination of K (12)		Ubiquitination of K (12: 100.0)	Ubiquitination of K (12: 28.222328701485388)	1	7.13819	88.0795
1060	P06576	Single Protein	ILQDYKSLQDIIAILGMDELSEEDKLTVSR	2	NH2-ILQDYK<ub>SLQDIIAILGM<ox>DELSEEDKLTVSR-COOH	427	QK	AR	Oxidation of M (17), Ubiquitination of K (6)		Oxidation of M (17: 100.0), Ubiquitination of K (6: 100.0, 25: 2.5802457181332383E-43)	Oxidation of M (17: 99.906191369606), Ubiquitination of K (6: 99.906191369606)	1	100	100
1070	O14827	Single Protein	NHQYSLQVLANCKQNR	1	NH2-NHQYSLQVLANCK<ub>QNR-COOH	342	VR	DF	Ubiquitination of K (13)		Ubiquitination of K (13: 100.0)	Ubiquitination of K (13: 84.61907043603259)	1	4.80617	77.4411
1071	Q8NDP4	Single Protein	HMVVHSGDGPYKCK	1	NH2-HM<ox>VVHSGDGPYK<ub>C<cmm>K-COOH	204	QR	FC	Carbamidomethylation of C (13), Oxidation of M (2), Ubiquitination of K (12)		Carbamidomethylation of C (13: 100.0), Oxidation of M (2: 100.0), Ubiquitination of K (12: 50.0, 14: 50.0)	Carbamidomethylation of C (13: 11.499760421657879), Oxidation of M (2: 11.499760421657879)	1	3.07496	63.7584
1125	Q9NRM6	Single Protein	CVKAGSLWDPNITACK	1	NH2-C<cmm>VK<ub>AGSLWDPNITAC<cmm>K<ub>-COOH	173	KK	KN	Carbamidomethylation of C (1, 15), Ubiquitination of K (16, 3)		Carbamidomethylation of C (1: 100.0, 15: 100.0), Ubiquitination of K (3: 100.0, 16: 100.0)	Carbamidomethylation of C (1: 28.41399137517968, 15: 28.41399137517968), Ubiquitination of K (3: 28.41399137517968, 16: 28.41399137517968)	1	7.9541	88.2155
1139	Q96J02	Single Protein	MRLLQFVTGTCRLPVGGFADLMGSNGPQK	2	NH2-M<ox>RLLQFVTGTC<cmm>RLPVGGFADLM<ox>GSNGPQK<ub>-COOH	825	KR	FC	Carbamidomethylation of C (11), Oxidation of M (1, 22), Ubiquitination of K (29)		Carbamidomethylation of C (11: 100.0), Oxidation of M (1: 100.0, 22: 100.0), Ubiquitination of K (29: 100.0)	Carbamidomethylation of C (11: 83.99616674652611), Oxidation of M (1: 83.99616674652611, 22: 83.99616674652611), Ubiquitination of K (29: 83.99616674652611)	1	5.70154	80.1347
1156	Q96F10	Single Protein	KVAEVALDKGCSQFR	2	NH2-K<ub>VAEVALDKGC<cmm>SQFR-COOH	112	IK	LA	Carbamidomethylation of C (11), Ubiquitination of K (1)		Carbamidomethylation of C (11: 100.0), Ubiquitination of K (1: 99.99999250252532, 9: 7.497474689255803E-6)	Carbamidomethylation of C (11: 87.58984187829421), Ubiquitination of K (1: 87.58984187829421)	1	5.30783	79.798
1167	Q5VZE5	Single Protein	VPPEFDFSAHK	0	NH2-VPPEFDFSAHK<ub>-COOH	707	SK	YF	Ubiquitination of K (11)		Ubiquitination of K (11: 100.0)	Ubiquitination of K (11: 14.135122184954485)	1	3.2786	64.705
1174	Q8NF91	Single Protein	DIADDEVATWIQDCNDLLK	0	NH2-DIADDEVATWIQDC<cmm>NDLLK<ub>-COOH	7273	NK	GL	Carbamidomethylation of C (14), Ubiquitination of K (19)		Carbamidomethylation of C (14: 100.0), Ubiquitination of K (19: 100.0)	Carbamidomethylation of C (14: 91.56684235745088), Ubiquitination of K (19: 91.56684235745088)	1	6.22554	86.9128
1175	O00339	Single Protein	AQDDVSEWASKAK	1	NH2-AQDDVSEWASK<longub>AK-COOH	771	GR	AN	Long ubiquitination (11)		Long ubiquitination (11: 50.0, 13: 50.0)		1	5.98426	85.3333
1178	Q8TE67	Single Protein	NKDQGGLTQAQYIDCFQKIK	2	NH2-NKDQGGLTQAQYIDC<cmm>FQK<ub>IK-COOH	273	KK	HS	Carbamidomethylation of C (15), Ubiquitination of K (18)		Carbamidomethylation of C (15: 100.0), Ubiquitination of K (2: 1.3517756004008556E-7, 18: 99.91468054088078, 20: 0.08531932394164418)	Carbamidomethylation of C (15: 92.6689027311931), Ubiquitination of K (18: 44.01118461038773)	1	14.0866	98.6532
1209	P28330	Single Protein	CIGAIAMTEPGAGSDLQGIKTNAK	1	NH2-C<cmm>IGAIAM<ox>TEPGAGSDLQGIKTNAK<ub>-COOH	166	GK	KD	Carbamidomethylation of C (1), Oxidation of M (7), Ubiquitination of K (24)		Carbamidomethylation of C (1: 100.0), Oxidation of M (7: 100.0), Ubiquitination of K (20: 0.051398440545376615, 24: 99.94860155945462)	Carbamidomethylation of C (1: 61.0924772400575), Oxidation of M (7: 61.0924772400575), Ubiquitination of K (24: 35.17010062290369)	1	4.03269	72.5166
1261	P78559	Single Protein	AGPMALSSKGSSGAPVYVDLAYIPNHCSGK	1	NH2-AGPM<ox>ALSSK<ub>GSSGAPVYVDLAYIPNHCSGK<ub>-COOH	2676	LK	TA	Oxidation of M (4), Ubiquitination of K (9, 30)		Oxidation of M (4: 100.0), Ubiquitination of K (9: 100.0, 30: 100.0)	Oxidation of M (4: 59.94250119789171), Ubiquitination of K (9: 59.94250119789171, 30: 59.94250119789171)	1	3.92676	69.3333
1268	Q8N4W9	Single Protein	CSECSKTFSQK	1	NH2-C<cmm>SEC<cmm>SK<ub>TFSQK-COOH	737	YK	AT	Carbamidomethylation of C (4, 1), Ubiquitination of K (6)		Carbamidomethylation of C (1: 100.0, 4: 100.0), Ubiquitination of K (6: 99.98610445388604, 11: 0.022794153152822648)	Carbamidomethylation of C (1: 24.532822232870146, 4: 24.532822232870146), Ubiquitination of K (6: 24.532822232870146)	2	11.5586	96.6554
1272	P31040	Single Protein	EDYKVRIDEYDYSKPIQGQQK	2	NH2-EDYK<ub>VRIDEYDYSKPIQGQQK-COOH	595	AR	KP	Ubiquitination of K (4)		Ubiquitination of K (4: 99.99999477977104, 14: 5.220228964368168E-6, 21: 1.0366190579811437E-19)	Ubiquitination of K (4: 66.09966459032103)	1	6.60674	87.0432
1276	P32239	Single Protein	SRPALELTALTAPGPGSGSRPTQAKLLAK	1	NH2-SRPALELTALTAPGPGSGSRPTQAK<ub>LLAK<ub>-COOH	300	PR	KR	Ubiquitination of K (25, 29)		Ubiquitination of K (25: 100.0, 29: 100.0)	Ubiquitination of K (25: 91.27934834690944, 29: 91.27934834690944)	1	7.35521	88.2943
1308	P17032	Single Protein	THTGEKPYECHECGKTFSFKSVLTVHQK	2	NH2-THTGEK<longub>PYECHECGK<ub>TFSFKSVLTVHQK<ub>-COOH	348	QR	TH	Long ubiquitination (6), Ubiquitination of K (28, 15)		Long ubiquitination (6: 99.90546765429504, 15: 0.04726617284311677, 20: 0.04726617284311677, 28: 1.873869132379592E-11), Ubiquitination of K (6: 0.023649863715230268, 15: 49.98817508271877, 20: 49.98817507301055, 28: 99.99999998055543)	Long ubiquitination (6: 99.2333493052228), Ubiquitination of K (20: 5.031145184475323, 28: 99.2333493052228)	1	23.483	99.6732
1351	Q8NDL9	Single Protein	NSPSFPFHGSRPAGLPGLGSSTQK	0	NH2-NSPSFPFHGSRPAGLPGLGSSTQK<ub>-COOH	663	MK	VT	Ubiquitination of K (24)		Ubiquitination of K (24: 100.0)	Ubiquitination of K (24: 77.38380450407283)	1	4.03822	72.4249
1352	Q9NZR1	Single Protein	YKNIDEDELLGKLSEEELK	2	NH2-YK<ub>NIDEDELLGK<ub>LSEEELK<ub>-COOH	12	EK	QL	Ubiquitination of K (12, 2, 19)		Ubiquitination of K (2: 100.0, 12: 100.0, 19: 100.0)	Ubiquitination of K (2: 77.57546717776714, 12: 77.57546717776714, 19: 77.57546717776714)	1	4.08786	72.4832
1415	O95714	Related Proteins	KETAPVQLPVSGPELAAMMKIGTR	2	NH2-K<ub>ETAPVQLPVSGPELAAM<ox>MK<ub>IGTR-COOH	1849; 577	TR; TR	VM; VM	Oxidation of M (18), Ubiquitination of K (20, 1)		Oxidation of M (18: 50.0, 19: 50.0), Ubiquitination of K (1: 100.0, 20: 100.0)	Ubiquitination of K (1: 79.6837565884044, 20: 79.6837565884044)	1	4.61814	78.1145
1420	Q14865	Single Protein	EPNSLQWVGSPCGLHGPYIFYK	0	NH2-EPNSLQWVGSPC<cmm>GLHGPYIFYK<ub>-COOH	2	M	AF	Carbamidomethylation of C (12), Ubiquitination of K (22)		Carbamidomethylation of C (12: 100.0), Ubiquitination of K (22: 100.0)	Carbamidomethylation of C (12: 98.70627695256348), Ubiquitination of K (22: 98.70627695256348)	1	23.1175	99.6923
1421	Q16706	Single Protein	DKTQYIFNNMVLK	1	NH2-DK<ub>TQYIFNNMVLK-COOH	190	FR	LK	Ubiquitination of K (2)		Ubiquitination of K (2: 99.9999999957711, 13: 4.2289040965304275E-9)	Ubiquitination of K (2: 55.10301868711068)	1	14.7349	98.8304
1426	Q9UNW8	Single Protein	GWKEWSMKTDVTR	2	NH2-GWK<longub>EWSM<ox>K<ub>TDVTR-COOH	325	HK	LT	Long ubiquitination (3), Oxidation of M (7), Ubiquitination of K (8)		Long ubiquitination (3: 99.99999693844123, 8: 3.0615587669009065E-6), Oxidation of M (7: 100.0), Ubiquitination of K (3: 0.01957560078152692, 8: 99.98042439921846)	Long ubiquitination (3: 10.44561571633924), Oxidation of M (7: 10.44561571633924), Ubiquitination of K (8: 10.44561571633924)	1	2.97396	60.9272
1438	P09543	Single Protein	IFFRKMSSSGAK	2	NH2-IFFRK<longub>MSSSGAK-COOH	16	PK	DK	Long ubiquitination (5)		Long ubiquitination (5: 99.95252326491084, 12: 0.047476735089153524)	Long ubiquitination (5: 15.524676569238139)	1	3.99824	72.459
1470	Q8WZ42	Single Protein	APITKVGLK	1	NH2-APITK<ub>VGLK-COOH	16578	SR	GV	Ubiquitination of K (5)		Ubiquitination of K (5: 99.99227248936344, 9: 0.007727510636563881)	Ubiquitination of K (5: 15.476760900814568)	1	4.39333	75.9259
1472	P78382	Single Protein	DNVTLLFKLYCLAVMTLMAAVYTIALR	1	NH2-DNVTLLFK<ub>LYC<cmm>LAVM<ox>TLMAAVYTIALR-COOH	6	PR	YT	Carbamidomethylation of C (11), Oxidation of M (15), Ubiquitination of K (8)		Carbamidomethylation of C (11: 100.0), Oxidation of M (15: 99.88263428207496, 18: 0.11736571792504205), Ubiquitination of K (8: 100.0)	Carbamidomethylation of C (11: 75.32343076185913), Oxidation of M (18: 29.289405583852187), Ubiquitination of K (8: 75.32343076185913)	1	3.48305	65.6566
1499	Q6XE24	Single Protein	TNLYIRGLPPGTTDQDLIKLCQPYGK	2	NH2-TNLYIRGLPPGTTDQDLIK<ub>LCQPYGK<longub>-COOH	61	SK	IV	Long ubiquitination (26), Ubiquitination of K (19)		Long ubiquitination (19: 0.07154671455680636, 26: 99.99999990312449), Ubiquitination of K (19: 99.99999990766437, 26: 0.07047430059235683)	Long ubiquitination (26: 77.2400574988021), Ubiquitination of K (19: 77.2400574988021)	2	4.03822	72.4249
1526	Q96H78	Single Protein	VQVEGKNSIILTFR	1	NH2-VQVEGK<ub>NSIILTFR-COOH	250	TR	QL	Ubiquitination of K (6)		Ubiquitination of K (6: 100.0)	Ubiquitination of K (6: 64.73406804024916)	1	4.36693	75.7576
1535	Q9H9Q2	Single Protein	MKCIPYSVLLKDLEMR	2	NH2-M<ox>K<longub>CIPYSVLLK<ub>DLEMR-COOH	108	SR	NL	Long ubiquitination (2), Oxidation of M (1), Ubiquitination of K (11)		Long ubiquitination (2: 99.99999760638059, 11: 2.393619409682301E-6), Oxidation of M (1: 99.99999824172379, 15: 1.7582762099933002E-6), Ubiquitination of K (2: 1.955664897740064E-6, 11: 99.9999980443351)	Long ubiquitination (2: 59.0321034978438), Oxidation of M (1: 59.0321034978438), Ubiquitination of K (11: 59.0321034978438)	1	3.62364	65.8784
1536	Q9P2K8	Single Protein	GAFGAVIKVQNK	1	NH2-GAFGAVIK<ub>VQNK-COOH	599	GK	LD	Ubiquitination of K (8)		Ubiquitination of K (8: 50.0, 12: 50.0)	Ubiquitination of K (8: 10.589362721609962)	1	2.96576	60.6667
1558	Q86Y13	Single Protein	RYNGGLLEFHKSLQEIGDK	2	NH2-RYNGGLLEFHK<ub>SLQEIGDK<ub>-COOH	194	QK	ND	Ubiquitination of K (11, 19)		Ubiquitination of K (11: 100.0, 19: 100.0)	Ubiquitination of K (11: 92.28557738380451, 19: 92.28557738380451)	1	7.68521	88.2155
1570	A3KN83	Single Protein	FFKYLCIASK	1	NH2-FFKYLC<cmm>IASK<longub>-COOH	600	QR	VK	Carbamidomethylation of C (6), Long ubiquitination (10)		Carbamidomethylation of C (6: 100.0), Long ubiquitination (3: 5.162997834283314E-18, 10: 100.0)	Carbamidomethylation of C (6: 16.482989937709636), Long ubiquitination (10: 16.482989937709636)	1	4.77121	77.3649
1585	O43866	Single Protein	VEVEQKGQWGTVCDDGWDIKDVAVLCR	2	NH2-VEVEQK<ub>GQWGTVCDDGWDIKDVAVLCR-COOH	37	GR	EL	Ubiquitination of K (6)		Ubiquitination of K (6: 99.99998479419642, 20: 1.5205803575741172E-5)	Ubiquitination of K (6: 76.85673215141351)	1	3.94062	69.3333
1595	Q9NPF5	Single Protein	AVPGTDLKIPVFDAGHER	1	NH2-AVPGTDLK<ub>IPVFDAGHER-COOH	207	VR	RR	Ubiquitination of K (8)		Ubiquitination of K (8: 100.0)	Ubiquitination of K (8: 30.953521801629137)	3	16.0384	98.1554
1608	Q15047	Single Protein	VVAKYKDGNQVWLYAGIVAETPNVK	2	NH2-VVAK<ub>YKDGNQVWLYAGIVAETPNVK<ub>-COOH	264	SR	NK	Ubiquitination of K (4, 25)		Ubiquitination of K (4: 99.94633462161387, 6: 66.66666666666666, 25: 99.99996503438346)	Ubiquitination of K (4: 2.827024436990896, 25: 99.8083373263057)	2	37.7941	100
1620	Q8N8U9	Single Protein	QRGACCEQCK	1	NH2-QRGACCEQCK<longub>-COOH	97	IK	GC	Long ubiquitination (10)		Long ubiquitination (10: 100.0)	Long ubiquitination (10: 14.326784858648779)	1	2.97396	60.9272
1621	Q14289	Single Protein	KMIQQTFQQYASLREEECVMK	2	NH2-K<ub>M<ox>IQQTFQQYASLREEEC<cmm>VM<ox>K-COOH	229	FR	FF	Carbamidomethylation of C (18), Oxidation of M (2, 20), Ubiquitination of K (1)		Carbamidomethylation of C (18: 100.0), Oxidation of M (2: 100.0, 20: 100.0), Ubiquitination of K (1: 99.99999995756599, 21: 4.243401435133434E-8)	Carbamidomethylation of C (18: 87.87733588883565), Oxidation of M (2: 87.87733588883565, 20: 87.87733588883565), Ubiquitination of K (1: 87.87733588883565)	1	6.15911	86.9346
1652	Q16566	Single Protein	MVPKAVEDGIKVADLELEEGLAEEK	2	NH2-M<ox>VPKAVEDGIK<longub>VADLELEEGLAEEK-COOH	416	PK	LK	Long ubiquitination (11), Oxidation of M (1), Ubiquitination of K (11)		Long ubiquitination (4: 5.542832172914586E-9, 11: 99.96900875323935, 25: 0.030991241217809436), Oxidation of M (1: 100.0), Ubiquitination of K (4: 4.726606305323109E-9, 11: 49.99999999763669, 25: 49.99999999763669)	Long ubiquitination (25: 52.634315888300556), Oxidation of M (1: 62.48203162434116), Ubiquitination of K (11: 52.634315888300556)	1	4.08664	72.4083
1658	Q5QGS0	Single Protein	GIEKPPGKNSR	1	NH2-GIEK<ub>PPGK<ub>NSR-COOH	1207	NK	QV	Ubiquitination of K (4, 8)		Ubiquitination of K (4: 100.0, 8: 100.0)	Ubiquitination of K (4: 58.55294681360805, 8: 58.55294681360805)	1	3.01901	62.8378
1663	O15146	Single Protein	LHPNPMYQRMPLLLNPKLLSLEYPR	2	NH2-LHPNPMYQRM<ox>PLLLNPK<longub>LLSLEYPR-COOH	548	DR	NN	Long ubiquitination (17), Oxidation of M (10)		Long ubiquitination (17: 100.0), Oxidation of M (6: 2.7202408539419137E-5, 10: 99.99997279759147)	Long ubiquitination (17: 74.7963584091998), Oxidation of M (10: 74.7963584091998)	1	3.39705	65.1007
1719	Q14807	Single Protein	ERMVLMKTVEEK	2	NH2-ERM<ox>VLM<ox>K<ub>TVEEK<ub>-COOH	467	KR	DL	Oxidation of M (3, 6), Ubiquitination of K (12, 7)		Oxidation of M (3: 100.0, 6: 100.0), Ubiquitination of K (7: 100.0, 12: 100.0)	Oxidation of M (3: 32.77431720172497, 6: 32.77431720172497), Ubiquitination of K (7: 32.77431720172497, 12: 32.77431720172497)	1	9.29419	91.2458
1733	P33992	Single Protein	SLKSDMMSHLVKIPGIIIAASAVR	2	NH2-SLKSDM<ox>M<ox>SHLVK<longub>IPGIIIAASAVR-COOH	139	IR	AK	Long ubiquitination (12), Oxidation of M (6, 7)		Long ubiquitination (3: 0.10138516459651835, 12: 99.955249549261), Oxidation of M (6: 100.0, 7: 100.0)	Oxidation of M (6: 84.57115476760902, 7: 84.57115476760902)	2	9.17158	91.001
1734	P05160	Single Protein	WSSPPVCLEPCTVNVDYMNRNNIEMK	1	NH2-WSSPPVCLEPCTVNVDYMNRNNIEMK<ub>-COOH	444	GK	WK	Ubiquitination of K (26)		Ubiquitination of K (26: 100.0)	Ubiquitination of K (26: 74.26928605654048)	1	3.43983	66
1737	Q9P2U7	Related Proteins	YASILMGISNGVGTLSGMVCPIIVGAMTK	0	NH2-YASILM<ox>GISNGVGTLSGMVC<cmm>PIIVGAMTK<ub>-COOH	433; 441	PR; PR	HK; NK	Carbamidomethylation of C (20), Oxidation of M (6), Ubiquitination of K (29)		Carbamidomethylation of C (20: 100.0), Oxidation of M (6: 99.9999999999913, 18: 8.699655329816843E-12, 27: 2.5731103989399434E-27), Ubiquitination of K (29: 100.0)	Carbamidomethylation of C (20: 87.87733588883565), Oxidation of M (6: 87.87733588883565), Ubiquitination of K (29: 87.87733588883565)	1	6.32302	87.2483
1745	Q13464	Single Protein	IMKELDEEGNQRR	2	NH2-IM<ox>K<ub>ELDEEGNQRR-COOH	463	DK	NL	Oxidation of M (2), Ubiquitination of K (3)		Oxidation of M (2: 100.0), Ubiquitination of K (3: 100.0)	Oxidation of M (2: 33.732630570196456), Ubiquitination of K (3: 33.732630570196456)	1	10.3415	94.5946
1754	Q02641	Single Protein	QKSTEHVPPYDVVPSMRPIILVGPSLK	1	NH2-QK<ub>STEHVPPYDVVPSMRPIILVGPSLK-COOH	214	QK	GY	Ubiquitination of K (2)		Ubiquitination of K (2: 99.99999999988495, 27: 1.1504529422628585E-10)	Ubiquitination of K (2: 94.68136080498323)	1	11.7221	96.8145
1755	Q96ND8	Single Protein	KTFSQNAGLAQHQR	1	NH2-K<longub>TFSQNAGLAQHQR-COOH	471	CR	IH	Long ubiquitination (1)		Long ubiquitination (1: 100.0)	Long ubiquitination (1: 62.5778629611883)	1	3.10711	63.878
1772	Q969V5	Single Protein	CVPYAVIEGAVRSVK	1	NH2-C<cmm>VPYAVIEGAVRSVK<ub>-COOH	62	GK	ET	Carbamidomethylation of C (1), Ubiquitination of K (15)		Carbamidomethylation of C (1: 100.0), Ubiquitination of K (15: 100.0)	Carbamidomethylation of C (1: 35.93675131768088), Ubiquitination of K (15: 35.93675131768088)	1	12.974	98.0769
1792	Q14209	Single Protein	KAKNNIQWVGR	2	NH2-K<ub>AKNNIQWVGR-COOH	185	RK	GM	Ubiquitination of K (1)		Ubiquitination of K (1: 50.0, 3: 50.0)		1	7.40363	88.2549
1817	P49589	Single Protein	RPEAAQLLEDVQAALKPFSVKLNETTDPDK	1	NH2-RPEAAQLLEDVQAALK<ub>PFSVKLNETTDPDK<ub>-COOH	119	EK	KQ	Ubiquitination of K (16, 30)		Ubiquitination of K (16: 99.96037051390009, 21: 66.66666666666667, 30: 99.99999999033147)	Ubiquitination of K (16: 90.36895064686152, 21: 81.57432372523878)	2	9.43027	91.1184
1821	Q8TDY2	Single Protein	LNCEKDEAIQTALK	1	NH2-LNCEK<ub>DEAIQTALK-COOH	1234	QK	EF	Ubiquitination of K (5)		Ubiquitination of K (5: 99.99998940241531, 14: 1.0597584685368635E-5)	Ubiquitination of K (5: 15.333013895543846)	1	3.12119	63.6364
1828	P48552	Single Protein	TTPVSTPPLLTSSKAGSPINLSQHSLVIK	1	NH2-TTPVSTPPLLTSSK<longub>AGSPINLSQHSLVIK-COOH	548	NR	WN	Long ubiquitination (14)		Long ubiquitination (14: 99.97535681996426, 29: 50.0)	Long ubiquitination (14: 28.460237708687007)	3	3.10235	63.9996
1834	Q96KM6	Single Protein	HMEVCQKLQDALK	1	NH2-HMEVC<cmm>QKLQDALK<ub>-COOH	529	KK	CQ	Carbamidomethylation of C (5), Ubiquitination of K (13)		Carbamidomethylation of C (5: 100.0), Ubiquitination of K (7: 1.8557006917578829E-6, 13: 99.99999814429931)	Carbamidomethylation of C (5: 75.3713464302827), Ubiquitination of K (13: 61.44851408596613)	1	4.05844	72.3333
1839	Q8N7Z5	Single Protein	HKQCFCDDGK	1	NH2-HK<ub>QC<cmm>FC<cmm>DDGK-COOH	1300	KR	TI	Carbamidomethylation of C (4, 6), Ubiquitination of K (2)		Carbamidomethylation of C (4: 100.0, 6: 100.0), Ubiquitination of K (2: 99.99999999098056, 10: 9.019435382967699E-9)	Carbamidomethylation of C (4: 16.09966459032104, 6: 16.09966459032104), Ubiquitination of K (2: 16.09966459032104)	1	3.94306	69.697
1842	Q8TAX0	Single Protein	KPTRGRLPSK	2	NH2-K<longub>PTRGRLPSK-COOH	161	EK	TK	Long ubiquitination (1)		Long ubiquitination (1: 99.9999999999945, 10: 5.495473102875918E-12)	Long ubiquitination (1: 87.30234786775274)	1	5.19124	79.6983
1857	O75077	Single Protein	KCSLSNGAHCSDGPCCNNTSCLFQPR	1	NH2-K<longub>C<cmm>SLSNGAHC<cmm>SDGPC<cmm>CNNTSCLFQPR-COOH	531	CK	GY	Carbamidomethylation of C (2, 10, 15), Long ubiquitination (1)		Carbamidomethylation of C (2: 74.92896236222526, 10: 74.92896236222525, 15: 74.92896236222523, 16: 74.92896236222523, 21: 0.2841505510991198), Long ubiquitination (1: 100.0)	Carbamidomethylation of C (21: 10.206037374221369), Long ubiquitination (1: 82.7024436990896)	1	5.70154	80.1347
1859	Q96MC4	Single Protein	QLESLEQMEHPDMSLEIHYKAELEKER	2	NH2-QLESLEQMEHPDMSLEIHYK<longub>AELEKER-COOH	516	QK	RE	Long ubiquitination (20)		Long ubiquitination (20: 99.99999999835211, 25: 0.15454105673523552)	Long ubiquitination (20: 90.8001916626737)	2	8.71638	89.0906
1864	P11137	Single Protein	DKIEGVGAATSAELDMPFYEDK	1	NH2-DKIEGVGAATSAELDM<ox>PFYEDK<longub>-COOH	545	DK	SG	Long ubiquitination (22), Oxidation of M (16)		Long ubiquitination (2: 6.090774194700777E-9, 22: 99.99999999390923), Oxidation of M (16: 100.0)	Long ubiquitination (22: 73.55055103018687), Oxidation of M (16: 73.55055103018687)	1	3.97071	70.8054
1865	Q6PJP8	Single Protein	VFTKSAHGGLQRGNK	2	NH2-VFTK<ub>SAHGGLQRGNK-COOH	671	VK	KI	Ubiquitination of K (4)		Ubiquitination of K (4: 99.95801910210066, 15: 0.0419808978993242)	Ubiquitination of K (4: 92.33349305222808)	1	7.68521	88.2155
1878	Q5BN46	Single Protein	TSNQAYGSRAPTVHEMPKVFYPNSNK	2	NH2-TSNQAYGSRAPTVHEMPK<longub>VFYPNSNK-COOH	58	YR	FS	Long ubiquitination (18)		Long ubiquitination (18: 99.95940638667498, 26: 0.040593613325005794)	Long ubiquitination (18: 83.51701006229038)	1	5.70154	80.1347
1881	Q8N9Z2	Single Protein	HQFSPHILRSKDVYGYSSCR	2	NH2-HQFSPHILRSK<longub>DVYGYSSCR-COOH	86	LK	AL	Long ubiquitination (11)		Long ubiquitination (11: 100.0)	Long ubiquitination (11: 97.60421657882128)	2	16.2106	98.0033
1891	P47869	Single Protein	KPENKPAEAK	0	NH2-K<longub>PENKPAEAK<ub>-COOH	399	NK	KT	Long ubiquitination (1), Ubiquitination of K (10)		Long ubiquitination (1: 49.99999999032763, 5: 49.99999999032763, 10: 1.9344739104656805E-8), Ubiquitination of K (1: 2.6785534006941954E-8, 5: 2.6785534006941954E-8, 10: 99.99999994642893)	Long ubiquitination (1: 21.89746046957355), Ubiquitination of K (10: 21.89746046957355)	1	5.64271	79.5302
1895	P05181	Single Protein	DLTDCLLVEMEKEKHSAER	2	NH2-DLTDCLLVEMEK<longub>EK<longub>HSAER-COOH	264	PR	LY	Long ubiquitination (12, 14)		Long ubiquitination (12: 100.0, 14: 100.0)	Long ubiquitination (12: 59.31959750838524, 14: 59.31959750838524)	1	3.72235	67.4497
1897	Q9ULW5	Single Protein	VLDVDGVKVKLQMWDTAGQER	2	NH2-VLDVDGVK<ub>VK<ub>LQM<ox>WDTAGQER-COOH	105	NK	FR	Oxidation of M (13), Ubiquitination of K (8, 10)		Oxidation of M (13: 100.0), Ubiquitination of K (8: 100.0, 10: 100.0)	Oxidation of M (13: 98.85002395783421), Ubiquitination of K (8: 98.85002395783421, 10: 98.85002395783421)	1	15.7015	98.6667
1920	Q9H7D7	Single Protein	CLYHNTKLDNNLDSVSLLIDHVCSR	1	NH2-CLYHNTK<ub>LDNNLDSVSLLIDHVCSR-COOH	316	DR	RQ	Ubiquitination of K (7)		Ubiquitination of K (7: 100.0)	Ubiquitination of K (7: 63.05701964542405)	1	3.12494	64.7651
1925	O43432	Single Protein	ESAKPEISAMSAHDKAALSEEELER	1	NH2-ESAK<ub>PEISAMSAHDKAALSEEELER-COOH	1200	TR	KS	Ubiquitination of K (4)		Ubiquitination of K (4: 50.0, 15: 50.0)		1	20.4727	98.6755
1936	A6NCL7	Single Protein	YKEAKEEK	2	NH2-YK<ub>EAK<ub>EEK-COOH	460	WR	RK	Ubiquitination of K (5, 2)		Ubiquitination of K (2: 100.0, 5: 99.99999975631707, 8: 2.436829384545548E-7)	Ubiquitination of K (2: 60.94873023478677, 5: 60.94873023478677)	1	14.0937	98.9189
1943	Q99459	Single Protein	MKILLGGYQSR	1	NH2-MK<ub>ILLGGYQSR-COOH	717	KK	AM	Ubiquitination of K (2)		Ubiquitination of K (2: 100.0)	Ubiquitination of K (2: 60.469573550551026)	1	3.92676	69.3333
1972	Q9UPP2	Single Protein	QQPALATALCPHAPAASDYELSLDLKNK	1	NH2-QQPALATALCPHAPAASDYELSLDLK<ub>NK-COOH	273	GR	QI	Ubiquitination of K (26)		Ubiquitination of K (26: 50.0, 28: 50.0)	Ubiquitination of K (26: 67.81948334689336)	1	6.76207	86.9565
1988	A8MXY4	Single Protein	SYKCEECGKAFQWSSK	2	NH2-SYKC<cmm>EEC<cmm>GK<longub>AFQWSSK<ub>-COOH	816	EK	LT	Carbamidomethylation of C (4, 7), Long ubiquitination (9), Ubiquitination of K (16)		Carbamidomethylation of C (4: 100.0, 7: 100.0), Long ubiquitination (3: 0.06532200849679078, 9: 99.93467799142985, 16: 7.333784665024766E-11), Ubiquitination of K (3: 4.747051491771703E-16, 9: 5.876108545074315E-11, 16: 99.99999999994125)	Carbamidomethylation of C (4: 62.24245328222329, 7: 62.24245328222329), Long ubiquitination (9: 11.463639909387474), Ubiquitination of K (16: 62.24245328222329)	1	3.08934	63.8796
1989	Q7Z3U7	Single Protein	QAEEKGVVLNRPFHPAPPFDCLWLCLYAK	1	NH2-QAEEKGVVLNRPFHPAPPFDCLWLCLYAK<ub>-COOH	1000	QK	LG	Ubiquitination of K (29)		Ubiquitination of K (5: 0.10595795239172012, 29: 99.89404204760828)	Ubiquitination of K (29: 74.74844274077623)	1	3.48305	65.6566
1999	Q9UI33	Single Protein	EVAGGCAAQSKDIIPLVMEMKR	2	NH2-EVAGGCAAQSK<longub>DIIPLVM<ox>EMK<ub>R-COOH	868	QK	GS	Long ubiquitination (11), Oxidation of M (18), Ubiquitination of K (21)		Long ubiquitination (11: 99.8880129016082, 21: 0.11198709839179667), Oxidation of M (18: 99.89164576077737, 20: 0.10835423922262849), Ubiquitination of K (11: 1.4697612259606806E-4, 21: 99.9998530238774)	Long ubiquitination (11: 86.10445615716338), Oxidation of M (18: 86.10445615716338), Ubiquitination of K (21: 86.10445615716338)	1	5.62975	80.9365
2017	Q9ULY5	Single Protein	CVVTFRIFQTCDEKK	2	NH2-C<cmm>VVTFRIFQTCDEK<ub>K-COOH	42	TR	FQ	Carbamidomethylation of C (1), Ubiquitination of K (14)		Carbamidomethylation of C (1: 50.0, 11: 50.0), Ubiquitination of K (14: 50.0, 15: 50.0)	Carbamidomethylation of C (1: 14.183037853378055), Ubiquitination of K (14: 14.183037853378055)	1	3.33516	64.8649
2028	Q7Z2D5	Single Protein	SSSARAKWLK	2	NH2-SSSARAK<ub>WLK-COOH	550	PK	AA	Ubiquitination of K (7)		Ubiquitination of K (7: 50.0, 10: 50.0)	Ubiquitination of K (7: 20.603737422137037)	1	4.88551	78.2895
2032	Q6ZNH5	Related Proteins	VHTGEKPYTCPECGK	0	NH2-VHTGEK<longub>PYTCPEC<cmm>GK<ub>-COOH	127; 463	RR; QR	AF; GF	Carbamidomethylation of C (13), Long ubiquitination (6), Ubiquitination of K (15)		Carbamidomethylation of C (10: 0.03012557730385211, 13: 99.96987442269615), Long ubiquitination (6: 99.96881343155371, 15: 0.031186568446278866), Ubiquitination of K (6: 1.1119344577066705E-5, 15: 99.99998888065542)	Carbamidomethylation of C (13: 30.893454940206478), Long ubiquitination (6: 56.25299472927647), Ubiquitination of K (15: 56.25299472927647)	1	3.01901	62.8378
2042	Q9BXX3	Single Protein	IYQYEKEK	1	NH2-IYQYEK<ub>EK<ub>-COOH	1384	NR	AE	Ubiquitination of K (8, 6)		Ubiquitination of K (6: 100.0, 8: 100.0)	Ubiquitination of K (6: 14.135122184954485, 8: 14.135122184954485)	1	3.99824	72.459
2089	P02708	Single Protein	RPSREKQDK	2	NH2-RPSREK<ub>QDK<ub>-COOH	376	MK	KI	Ubiquitination of K (9, 6)		Ubiquitination of K (6: 100.0, 9: 100.0)	Ubiquitination of K (6: 14.614278869190223, 9: 14.614278869190223)	1	4.04571	72.3333
2110	Q9NRY4	Single Protein	GKTKIIPYFEALK	2	NH2-GK<ub>TK<ub>IIPYFEALK-COOH	252	SR	QQ	Ubiquitination of K (4, 2)		Ubiquitination of K (2: 99.99999995848786, 4: 99.95675480918034, 13: 0.043245232331801074)	Ubiquitination of K (2: 14.230953521801625, 4: 14.230953521801625)	1	3.29856	64.9391
2113	P55265	Single Protein	LGTPKKEINR	2	NH2-LGTPK<longub>KEINR-COOH	165	GK	VL	Long ubiquitination (5)		Long ubiquitination (5: 99.98878129371961, 6: 0.01121870628038518)	Long ubiquitination (5: 36.67944417824628)	1	3.16119	64.9407
2149	Q9UBE8	Single Protein	KMPNVFQNLVSCKR	2	NH2-KM<ox>PNVFQNLVSCK<ub>R-COOH	168	LK	VF	Oxidation of M (2), Ubiquitination of K (13)		Oxidation of M (2: 100.0), Ubiquitination of K (1: 9.770080459084997E-10, 13: 99.99999999902299)	Oxidation of M (2: 28.36607570675611), Ubiquitination of K (13: 28.36607570675611)	1	7.40363	88.2549
2157	Q8WZ42	Single Protein	VLETGDRVKMK	2	NH2-VLETGDRVK<longub>M<ox>K-COOH	14361	DK	TL	Long ubiquitination (9), Oxidation of M (10)		Long ubiquitination (9: 99.98779147132127, 11: 0.012208528678729732), Oxidation of M (10: 100.0)	Long ubiquitination (11: 30.618112122664115), Oxidation of M (10: 55.15093435553426)	1	3.00161	61.5128
2166	Q8N4C6	Single Protein	TYKEHLNSMVVERQQLLQDLEDLR	2	NH2-TYK<ub>EHLNSM<ox>VVERQQLLQDLEDLR-COOH	900	EK	NV	Oxidation of M (9), Ubiquitination of K (3)		Oxidation of M (9: 100.0), Ubiquitination of K (3: 100.0)	Oxidation of M (9: 82.60661236224244), Ubiquitination of K (3: 82.60661236224244)	1	5.62975	80.9365
2200	Q5TKA1	Single Protein	TGLGTHTIPDYEVLSNEPHETMPIAAFGQK	0	NH2-TGLGTHTIPDYEVLSNEPHETMPIAAFGQK<ub>-COOH	259	DR	QR	Ubiquitination of K (30)		Ubiquitination of K (30: 100.0)	Ubiquitination of K (30: 96.0709151892669)	1	12.6912	97.4277
2224	Q7Z403	Single Protein	GMPLSLAEKRSLR	2	NH2-GMPLSLAEK<ub>RSLR-COOH	167	LR	EK	Ubiquitination of K (9)		Ubiquitination of K (9: 100.0)	Ubiquitination of K (9: 34.54719693339722)	1	9.48639	91.5825
2230	Q9Y4P8	Single Protein	FFSLSSVDKLEQIYECTDTEDVCIVER	1	NH2-FFSLSSVDK<ub>LEQIYECTDTEDVCIVER-COOH	55	YK	LF	Ubiquitination of K (9)		Ubiquitination of K (9: 100.0)	Ubiquitination of K (9: 81.6003833253474)	1	5.2223	79.798
2232	Q92621	Single Protein	HLEKAVQHCLALLNLTLQKENLFMDLLR	2	NH2-HLEKAVQHCLALLNLTLQK<ub>ENLFMDLLR-COOH	841	KK	ES	Ubiquitination of K (19)		Ubiquitination of K (4: 1.5711440328406837E-21, 19: 100.0)	Ubiquitination of K (19: 80.067081935793)	1	4.90972	79.3333
2241	Q8NCK3	Single Protein	EKPHKCIECGKTFR	2	NH2-EK<ub>PHKC<cmm>IEC<cmm>GKTFR-COOH	211	SR	KN	Carbamidomethylation of C (9, 6), Ubiquitination of K (2)		Carbamidomethylation of C (6: 100.0, 9: 100.0), Ubiquitination of K (2: 99.972728592029, 5: 0.02727139767039827, 11: 1.0300601104138283E-8)	Carbamidomethylation of C (6: 10.828941063727838, 9: 10.828941063727838), Ubiquitination of K (2: 10.828941063727838)	1	3.07561	63.7584
2245	Q9H6N6	Single Protein	RDLEGLETTLAKTEK	2	NH2-RDLEGLETTLAK<longub>TEK<ub>-COOH	144	LK	EK	Long ubiquitination (12), Ubiquitination of K (15)		Long ubiquitination (12: 50.0, 15: 50.0), Ubiquitination of K (12: 50.0, 15: 50.0)	Long ubiquitination (12: 35.64925730713943), Ubiquitination of K (15: 35.64925730713943)	1	4.35649	76.0539
2246	Q9HAU5	Single Protein	NTAFVKKLK	2	NH2-NTAFVK<longub>K<ub>LK-COOH	171	KK	TI	Long ubiquitination (6), Ubiquitination of K (7)		Long ubiquitination (6: 49.99999189193734, 7: 49.99999189193734, 9: 1.6216125318111345E-5), Ubiquitination of K (6: 49.9999936547256, 7: 49.9999936547256, 9: 1.2690548795665047E-5)	Long ubiquitination (6: 18.207954000958317), Ubiquitination of K (7: 18.207954000958317)	1	5.00289	78.8591
2269	Q8TBZ0	Single Protein	HGFCENLDDICHSIKQMKEELQK	2	NH2-HGFC<cmm>ENLDDICHSIKQM<ox>KEELQK<ub>-COOH	232	LK	SH	Carbamidomethylation of C (4), Oxidation of M (17), Ubiquitination of K (23)		Carbamidomethylation of C (4: 99.99999999999989, 11: 1.0308449030280129E-13), Oxidation of M (17: 100.0), Ubiquitination of K (15: 0.012045772722075722, 18: 0.012045772722075722, 23: 99.97590845455586)	Carbamidomethylation of C (4: 90.08145663632008), Oxidation of M (17: 90.08145663632008), Ubiquitination of K (18: 30.148556948208356)	1	7.25056	88.0795
2275	P13942	Single Protein	GRTGPTGDPGPPGLMGEKGK	2	NH2-GRTGPTGDPGPPGLMGEKGK<longub>-COOH	775	PK	LG	Long ubiquitination (20)		Long ubiquitination (18: 0.06364403035991108, 20: 99.93635596964009)	Long ubiquitination (20: 87.11068519405846)	1	6.07942	86.711
2304	Q9Y623	Single Protein	SAMKTLAFLFSGAQTAEAEGGGGKK	2	NH2-SAMKTLAFLFSGAQTAEAEGGGGKK<ub>-COOH	615	QK	GG	Ubiquitination of K (25)		Ubiquitination of K (4: 0.010901109240746587, 24: 49.99999999999992, 25: 99.99196369243043)		4	6.69595	86.8687
2305	P61266	Single Protein	KFVEVMTEYNATQSK	1	NH2-K<ub>FVEVM<ox>TEYNATQSK<ub>-COOH	125	SR	YR	Oxidation of M (6), Ubiquitination of K (1, 15)		Oxidation of M (6: 100.0), Ubiquitination of K (1: 100.0, 15: 100.0)	Oxidation of M (6: 11.348781937017227), Ubiquitination of K (1: 11.348781937017227, 15: 11.348781937017227)	1	3.10173	63.9996
2329	O60361	Single Protein	NIIHGSDSVKSAEKEISLR	2	NH2-NIIHGSDSVK<longub>SAEKEISLR-COOH	100	GR	FK	Long ubiquitination (10)		Long ubiquitination (10: 50.0, 14: 50.0)	Long ubiquitination (10: 0.6769064394891222)	1	3.39705	65.1007
2346	Q13489	Single Protein	VCMDKEVSIVFIPCGHLVVCKDCAPSLR	2	NH2-VCMDK<ub>EVSIVFIPCGHLVVCK<longub>DC<cmm>APSLR-COOH	559	CK	KC	Carbamidomethylation of C (23), Long ubiquitination (21), Ubiquitination of K (5)		Carbamidomethylation of C (2: 4.598294920464358E-7, 14: 2.2270626795266733E-4, 20: 0.1356951996486134, 23: 99.86408163425395), Long ubiquitination (5: 2.148272892742372E-4, 21: 99.99978517271072), Ubiquitination of K (5: 99.86681366540432, 21: 0.13318633459568593)	Carbamidomethylation of C (23: 55.27906167982318), Long ubiquitination (21: 77.5483440167171), Ubiquitination of K (5: 77.5483440167171)	1	6.15911	86.9346
2370	Q9Y485	Single Protein	AAFYRKNDPLDAAIFYLAMK	2	NH2-AAFYRK<longub>NDPLDAAIFYLAM<ox>K<ub>-COOH	1628	AK	KK	Long ubiquitination (6), Oxidation of M (19), Ubiquitination of K (20)		Long ubiquitination (6: 100.0, 20: 5.606405028426128E-17), Oxidation of M (19: 100.0), Ubiquitination of K (6: 1.601645237299678E-13, 20: 99.99999999999984)	Long ubiquitination (6: 98.80210828941064), Oxidation of M (19: 98.80210828941064), Ubiquitination of K (20: 98.80210828941064)	1	9.82097	93.6909
2376	Q8WVV4	Single Protein	RNLEQENQNLRMQVSETCTGPMLQAK	2	NH2-RNLEQENQNLRMQVSETC<cmm>TGPMLQAK<longub>-COOH	427	CK	MD	Carbamidomethylation of C (18), Long ubiquitination (26)		Carbamidomethylation of C (18: 100.0), Long ubiquitination (26: 100.0)	Carbamidomethylation of C (18: 96.83756588404408), Long ubiquitination (26: 96.83756588404408)	1	12.3436	97.3684
2389	Q14520	Single Protein	LKPVDGHCALESKYVK	1	NH2-LKPVDGHC<cmm>ALESK<ub>YVK<ub>-COOH	417	LK	TV	Carbamidomethylation of C (8), Ubiquitination of K (16, 13)		Carbamidomethylation of C (8: 100.0), Ubiquitination of K (2: 4.062939963887343E-16, 13: 100.0, 16: 100.0)	Carbamidomethylation of C (8: 99.04168663152852), Ubiquitination of K (13: 99.04168663152852, 16: 99.04168663152852)	1	10.7485	95.6522
2398	O95672	Single Protein	VTLGQLQKITPHLR	1	NH2-VTLGQLQK<longub>ITPHLR-COOH	342	NK	WK	Long ubiquitination (8)		Long ubiquitination (8: 100.0)	Long ubiquitination (8: 33.34930522280786)	1	9.96366	93.3775
2427	O75665	Single Protein	ELELELESVKAQSLAITKQNHMLNEK	2	NH2-ELELELESVKAQSLAITK<longub>QNHMLNEK-COOH	405	VK	VK	Long ubiquitination (18), Ubiquitination of K (18)		Long ubiquitination (10: 0.12177792317626167, 18: 99.87822177629745, 26: 3.005262892142926E-7), Ubiquitination of K (10: 33.33333333333333, 18: 33.33333333333333, 26: 33.33333333333333)	Long ubiquitination (10: 26.61715380929564), Ubiquitination of K (18: 26.61715380929564)	1	13.0691	98.1013
2428	Q6PIW4	Single Protein	WQSGLSINNVFK	0	NH2-WQSGLSINNVFK<ub>-COOH	100	DK	MS	Ubiquitination of K (12)		Ubiquitination of K (12: 100.0)	Ubiquitination of K (12: 24.436990896023005)	1	5.98426	85.3333
2452	Q14CN4	Single Protein	SEIGNVKKQCADLETAIADAEQR	2	NH2-SEIGNVK<ub>K<ub>QC<cmm>ADLETAIADAEQR-COOH	355	IR	GD	Carbamidomethylation of C (10), Ubiquitination of K (8, 7)		Carbamidomethylation of C (10: 100.0), Ubiquitination of K (7: 100.0, 8: 100.0)	Carbamidomethylation of C (10: 98.8979396262578), Ubiquitination of K (7: 98.8979396262578, 8: 98.8979396262578)	2	26.6319	99.7106
2457	O75410	Single Protein	VKKHETQSLALDACSR	2	NH2-VK<longub>KHETQSLALDACSR-COOH	469	CK	DE	Long ubiquitination (2)		Long ubiquitination (2: 50.0, 3: 50.0)		1	2.93267	57.9125
2462	Q86XE0	Single Protein	NRKELLGGFLR	2	NH2-NRK<ub>ELLGGFLR-COOH	173	GK	NI	Ubiquitination of K (3)		Ubiquitination of K (3: 100.0)	Ubiquitination of K (3: 10.733109726880684)	1	2.94331	60.2694
2483	P49790	Single Protein	QTGIETPNKSGKTTLSASGTGFGDK	2	NH2-QTGIETPNK<longub>SGK<longub>TTLSASGTGFGDK<ub>-COOH	694	AK	FK	Long ubiquitination (12, 9), Ubiquitination of K (25)		Long ubiquitination (9: 99.99999999970996, 12: 99.99999981644642, 25: 1.8384361762938767E-7), Ubiquitination of K (9: 0.15776506596876622, 12: 2.919752244107214E-4, 25: 99.84194295880683)	Long ubiquitination (12: 28.34211787254432, 25: 94.68136080498323), Ubiquitination of K (9: 28.34211787254432)	1	11.7221	96.8145
2511	Q8NA69	Single Protein	FFSTQYKDEFPFK	1	NH2-FFSTQYKDEFPFK<ub>-COOH	446	LR	YQ	Ubiquitination of K (13)		Ubiquitination of K (7: 50.0, 13: 50.0)	Ubiquitination of K (13: 10.541447053186392)	1	2.94118	60.1351
2517	Q4G0P3	Single Protein	DIGHKVAPGVPSIFRILFTPEENK	2	NH2-DIGHK<ub>VAPGVPSIFRILFTPEENK-COOH	149	PK	DY	Ubiquitination of K (5)		Ubiquitination of K (5: 99.99999999998988, 24: 1.0109406235192253E-11)	Ubiquitination of K (5: 74.12553905126977)	1	3.97071	70.8054
2524	P53621	Single Protein	KMMKIAEIR	2	NH2-K<ub>M<ox>MK<ub>IAEIR-COOH	718	LR	KD	Oxidation of M (2), Ubiquitination of K (4, 1)		Oxidation of M (2: 50.0, 3: 50.0), Ubiquitination of K (1: 100.0, 4: 100.0)	Ubiquitination of K (1: 91.61475802587447, 4: 91.61475802587447)	1	100	100
2533	Q8NEZ3	Single Protein	GITGDNKEHDEACLAGVAQMSIR	1	NH2-GITGDNK<ub>EHDEAC<cmm>LAGVAQM<ox>SIR-COOH	801	EK	MG	Carbamidomethylation of C (13), Oxidation of M (20), Ubiquitination of K (7)		Carbamidomethylation of C (13: 100.0), Oxidation of M (20: 100.0), Ubiquitination of K (7: 100.0)	Carbamidomethylation of C (13: 63.00910397700048), Oxidation of M (20: 63.00910397700048), Ubiquitination of K (7: 63.00910397700048)	1	4.3094	75.7161
2545	P60709	Related Proteins	DLTDYLMKILTER	1	NH2-DLTDYLMK<ub>ILTER-COOH	184; 186; 184; 185; 186; 186; 185	GR; GR; GR; GR; GR; GR; GR	GY; GY; GY; GY; GY; GY; GY	Ubiquitination of K (8)		Ubiquitination of K (8: 100.0)	Ubiquitination of K (8: 62.91327264015333)	1	14.0937	98.9189
2557	Q8N4N3	Single Protein	VKPAVCSLLPK	0	NH2-VK<ub>PAVCSLLPK<ub>-COOH	249	HR	EA	Ubiquitination of K (2, 11)		Ubiquitination of K (2: 100.0, 11: 100.0)	Ubiquitination of K (2: 15.476760900814568, 11: 15.476760900814568)	1	4.09369	74.5791
2561	P09012	Single Protein	KAVQGGGATPVVGAVQGPVPGMPPMTQAPR	1	NH2-K<ub>AVQGGGATPVVGAVQGPVPGM<ox>PPM<ox>TQAPR-COOH	123	TK	IM	Oxidation of M (25, 22), Ubiquitination of K (1)		Oxidation of M (22: 100.0, 25: 100.0), Ubiquitination of K (1: 100.0)	Oxidation of M (22: 73.1193100143747, 25: 73.1193100143747), Ubiquitination of K (1: 73.1193100143747)	1	3.10878	63.878
2590	Q9UDY8	Single Protein	VLEPEGSPSLCLLKLMGEK	1	NH2-VLEPEGSPSLC<cmm>LLK<ub>LM<ox>GEK-COOH	81	LK	GC	Carbamidomethylation of C (11), Oxidation of M (16), Ubiquitination of K (14)		Carbamidomethylation of C (11: 100.0), Oxidation of M (16: 100.0), Ubiquitination of K (14: 50.0, 19: 50.0)	Carbamidomethylation of C (11: 63.727839003354106), Oxidation of M (16: 63.727839003354106)	1	3.14285	64.6465
2596	Q8IYQ7	Single Protein	ITQKCFSSIHVKTDK	2	NH2-ITQK<ub>CFSSIHVK<ub>TDK-COOH	13	KK	HA	Ubiquitination of K (4, 12)		Ubiquitination of K (4: 99.99999544565564, 12: 99.98187852189939, 15: 0.0181260324449638)	Ubiquitination of K (4: 25.155725922376615, 12: 25.155725922376615)	1	6.44183	86.4865
2606	P49792	Single Protein	ERGIGNVKILR	2	NH2-ERGIGNVK<ub>ILR-COOH	1213	WK	HK	Ubiquitination of K (8)		Ubiquitination of K (8: 100.0)	Ubiquitination of K (8: 15.285098227120264)	1	4.65985	78.4053
2607	O43520	Single Protein	QKAMVVDLVKR	2	NH2-QKAMVVDLVK<ub>R-COOH	872	PK	YK	Ubiquitination of K (10)		Ubiquitination of K (2: 9.576578870689452E-13, 10: 99.99999999999905)	Ubiquitination of K (10: 14.518447532343082)	1	3.45098	65.8283
2613	A8K2U0	Single Protein	FKVEVVEPK	1	NH2-FKVEVVEPK<ub>-COOH	219	PK	EL	Ubiquitination of K (9)		Ubiquitination of K (2: 1.330049977814792E-12, 9: 99.99999999999866)	Ubiquitination of K (9: 40.584571154767616)	1	11.7246	96.7638
2627	Q6UB99	Single Protein	TREPSNAKQQK	2	NH2-TREPSNAK<longub>QQK-COOH	439	SK	EK	Long ubiquitination (8)		Long ubiquitination (8: 99.98640187113372, 11: 50.0)	Long ubiquitination (8: 10.947616244849911)	2	5.56754	80.3358
2644	O94805	Single Protein	KFSPWIGGSILASLGTFQQMWISK	1	NH2-K<ub>FSPWIGGSILASLGTFQQM<ox>WISK<ub>-COOH	387	ER	QE	Oxidation of M (20), Ubiquitination of K (24, 1)		Oxidation of M (20: 100.0), Ubiquitination of K (1: 100.0, 24: 100.0)	Oxidation of M (20: 88.26066123622425), Ubiquitination of K (1: 88.26066123622425, 24: 88.26066123622425)	1	6.49335	87.3786
2673	O95359	Single Protein	LPALGEKRPEGACGDGQSSRVSPPAADVLK	2	NH2-LPALGEK<longub>RPEGAC<cmm>GDGQSSRVSPPAADVLK-COOH	941	QK	DF	Carbamidomethylation of C (13), Long ubiquitination (7)		Carbamidomethylation of C (13: 100.0), Long ubiquitination (7: 99.99999999999999, 30: 7.355419318088739E-15)	Carbamidomethylation of C (13: 98.22712026832774), Long ubiquitination (7: 98.22712026832774)	1	14.4521	98.8304
2712	Q9H6K1	Single Protein	LSQNSVNLSPSSHANNLSVVTYSK	0	NH2-LSQNSVNLSPSSHANNLSVVTYSK<ub>-COOH	264	NR	GL	Ubiquitination of K (24)		Ubiquitination of K (24: 100.0)	Ubiquitination of K (24: 88.35649257307139)	1	11.3566	96.6216
2737	Q9UBV4	Single Protein	DDLLYVNKSPNYCVEDK	1	NH2-DDLLYVNKSPNYCVEDK<longub>-COOH	282	HK	KL	Long ubiquitination (17)		Long ubiquitination (8: 1.1833802669755627E-5, 17: 99.99998816619734)	Long ubiquitination (17: 81.79204599904169)	1	4.28588	76.9481
2759	P49798	Single Protein	IYNEFISVQATKEVNLDSCTREETSR	2	NH2-IYNEFISVQATK<ub>EVNLDSCTREETSR-COOH	114	KK	NM	Ubiquitination of K (12)		Ubiquitination of K (12: 100.0)	Ubiquitination of K (12: 86.58361284139914)	1	5.70154	80.1347
2778	Q9UGU0	Single Protein	CPKHKPPLPCPLPPLQNKTAK	2	NH2-CPKHKPPLPCPLPPLQNKTAK<ub>-COOH	1929	VR	GS	Ubiquitination of K (21)		Ubiquitination of K (3: 2.2451061424402405E-14, 5: 2.2451061424402405E-14, 18: 49.99999999999998, 21: 49.99999999999998)	Ubiquitination of K (21: 28.629611883085772)	1	13.0691	98.1013
2807	P35670	Single Protein	GDIVKVVPGGK	1	NH2-GDIVKVVPGGK<ub>-COOH	828	QR	FP	Ubiquitination of K (11)		Ubiquitination of K (5: 6.296831100488736E-10, 11: 99.99999999937032)	Ubiquitination of K (11: 45.51988500239579)	1	10.8486	95.7096
2810	Q9NYV6	Single Protein	KSERTLECYVHNLLR	2	NH2-K<ub>SERTLEC<cmm>YVHNLLR-COOH	217	VR	IS	Carbamidomethylation of C (8), Ubiquitination of K (1)		Carbamidomethylation of C (8: 100.0), Ubiquitination of K (1: 100.0)	Carbamidomethylation of C (8: 24.34115955917585), Ubiquitination of K (1: 24.34115955917585)	1	6.13149	86.4865
2816	P00480	Single Protein	NFTGEEIKYMLWLSADLK	1	NH2-NFTGEEIK<ub>YMLWLSADLK-COOH	47	LK	FR	Ubiquitination of K (8)		Ubiquitination of K (8: 99.96764751234316, 18: 0.03235248765683147)	Ubiquitination of K (8: 55.05510301868711)	1	2.967	60.6667
2825	O00570	Related Proteins	MHNSEISKRLGAEWK	2	NH2-MHNSEISK<longub>RLGAEWK-COOH	76; 33; 66; 33	PK; PK; PK; PK	VM; LL; LL; LL	Long ubiquitination (8)		Long ubiquitination (8: 99.99999999758235, 15: 2.4176405438049124E-9)	Long ubiquitination (8: 64.20699568758984)	1	4.36693	75.7576
2830	P17035	Related Proteins	DVMLENYRNLVSLDISSKCMMK	2	NH2-DVMLENYRNLVSLDISSK<longub>C<cmm>M<ox>MK-COOH	35; 35; 35; 35	YR; YR; YR; YR	TF; EF; EF; EF	Carbamidomethylation of C (19), Long ubiquitination (18), Oxidation of M (20), Ubiquitination of K (18)		Carbamidomethylation of C (19: 100.0), Long ubiquitination (18: 99.97737226753625, 22: 0.02262773246374262), Oxidation of M (3: 9.342022690928076E-20, 20: 99.97768292660182, 21: 0.022317073398178695), Ubiquitination of K (18: 50.0, 22: 50.0)	Carbamidomethylation of C (19: 75.27551509343556)	1	3.43983	66
2835	Q5VZ46	Single Protein	KAASFQNLHSLLSSKGNR	2	NH2-KAASFQNLHSLLSSK<longub>GNR-COOH	1062	RR	SS	Long ubiquitination (15)		Long ubiquitination (1: 8.042411607874196E-17, 15: 100.0)	Long ubiquitination (15: 80.88164829899377)	1	5.15796	79.5987
2856	Q8TB69	Single Protein	KPQFLSAAPTEPCIPMNKYQHK	1	NH2-K<ub>PQFLSAAPTEPCIPM<ox>NKYQHK-COOH	127	QK	FL	Oxidation of M (16), Ubiquitination of K (1)		Oxidation of M (16: 100.0), Ubiquitination of K (1: 100.0, 18: 1.3741613814453314E-15, 22: 1.3741613814453314E-15)	Oxidation of M (16: 74.7963584091998), Ubiquitination of K (1: 74.7963584091998)	1	3.48305	65.6566
2878	Q9H714	Single Protein	IKKGLLAPLLK	2	NH2-IK<longub>K<longub>GLLAPLLK-COOH	571	VR	DI	Long ubiquitination (2, 3)		Long ubiquitination (2: 99.99999999999999, 3: 99.99999999999999, 11: 3.3172747958819715E-14)	Long ubiquitination (2: 75.80258744609488, 3: 75.80258744609488)	1	3.66034	66.5563
2883	Q9NTJ3	Single Protein	RIAEMETQKEK	2	NH2-RIAEM<ox>ETQK<longub>EK-COOH	333	QK	IH	Long ubiquitination (9), Oxidation of M (5)		Long ubiquitination (9: 50.0, 11: 50.0), Oxidation of M (5: 100.0)	Oxidation of M (5: 10.253953042644948)	1	3.0103	61.4094
2885	Q9H792	Single Protein	KRSHSSPSQIPK	2	NH2-K<ub>RSHSSPSQIPK-COOH	1031	EK	KI	Ubiquitination of K (1)		Ubiquitination of K (1: 99.99999999999997, 12: 7.675672915871905E-6)	Ubiquitination of K (1: 61.28413991375179)	2	5.23101	79.798
2891	Q8N0S6	Single Protein	TPGEVTQEEVDLFMDCLYSHFHRHFK	1	NH2-TPGEVTQEEVDLFM<ox>DC<cmm>LYSHFHRHFK<ub>-COOH	271	HK	IH	Carbamidomethylation of C (16), Oxidation of M (14), Ubiquitination of K (26)		Carbamidomethylation of C (16: 100.0), Oxidation of M (14: 100.0), Ubiquitination of K (26: 100.0)	Carbamidomethylation of C (16: 49.257307139434594), Oxidation of M (14: 49.257307139434594), Ubiquitination of K (26: 49.257307139434594)	3	4.60896	78.2244
2897	Q13127	Single Protein	EEASGDQKLLNTGEGNKEAPLQK	2	NH2-EEASGDQKLLNTGEGNK<longub>EAPLQK-COOH	874	LR	VG	Long ubiquitination (17)		Long ubiquitination (8: 0.047900207470701825, 17: 99.95207190691038, 23: 2.7885618921438685E-5)	Long ubiquitination (17: 62.24245328222329)	1	3.08934	63.8796
2905	O00472	Single Protein	DKNSLGAILQQVANLNSKDLSYTLK	2	NH2-DK<longub>NSLGAILQQVANLNSKDLSYTLK-COOH	237	QK	DY	Long ubiquitination (2)		Long ubiquitination (2: 99.99999999999767, 18: 2.3301689789593862E-12, 25: 1.0025231538216018E-21)	Long ubiquitination (2: 87.49401054144705)	1	6.15911	86.9346
2918	Q9BR61	Single Protein	SKNVDVNVKDEEGR	2	NH2-SK<ub>NVDVNVK<longub>DEEGR-COOH	180	IK	AL	Long ubiquitination (9), Ubiquitination of K (2)		Long ubiquitination (2: 1.4580176546398423E-9, 9: 99.99999999854198), Ubiquitination of K (2: 99.99999999868713, 9: 1.3128691281286926E-9)	Long ubiquitination (9: 60.61332055582176), Ubiquitination of K (2: 60.61332055582176)	1	3.08934	63.8796
2936	Q8TEK3	Single Protein	SPVGAEPAVYPWPLPVYDK	0	NH2-SPVGAEPAVYPWPLPVYDK<ub>-COOH	11	LK	HH	Ubiquitination of K (19)		Ubiquitination of K (19: 100.0)	Ubiquitination of K (19: 51.557259223766174)	1	3.16119	64.9407
2965	Q6PFW1	Single Protein	DSEGKEIRYPVMLTAMEK	2	NH2-DSEGK<ub>EIRYPVMLTAMEK-COOH	285	ER	LV	Ubiquitination of K (5)		Ubiquitination of K (5: 99.93244002015726, 18: 0.0675599798427425)	Ubiquitination of K (5: 55.48634403449928)	1	3.62364	65.8784
2981	Q58A45	Single Protein	TIHTAGLACRVMDPTKILITGK	2	NH2-TIHTAGLAC<cmm>RVMDPTK<ub>ILITGK<longub>-COOH	630	LR	TR	Carbamidomethylation of C (9), Long ubiquitination (22), Ubiquitination of K (16)		Carbamidomethylation of C (9: 100.0), Long ubiquitination (16: 5.0605032850083105E-8, 22: 99.99999994939498), Ubiquitination of K (16: 99.99999994632292, 22: 5.367708168471072E-8)	Carbamidomethylation of C (9: 69.1902252036416), Long ubiquitination (22: 69.1902252036416), Ubiquitination of K (16: 69.1902252036416)	1	3.65662	66.5563
3003	Q9BY12	Single Protein	DFKALIDWIQLQEK	1	NH2-DFK<ub>ALIDWIQLQEK-COOH	143	VR	LE	Ubiquitination of K (3)		Ubiquitination of K (3: 99.96711224780223, 14: 0.032887752197767434)	Ubiquitination of K (3: 70.29228557738381)	1	5.19362	79.798
3009	Q13489	Single Protein	MNIVENSIFLSNLMK	0	NH2-MNIVENSIFLSNLMK<ub>-COOH	1		SA	Ubiquitination of K (15)		Ubiquitination of K (15: 100.0)	Ubiquitination of K (15: 23.766171538092962)	1	5.78282	83.557
3018	Q9BSI4	Single Protein	NLGSPTQVISKPESKEEHAIYTADLAMGTR	1	NH2-NLGSPTQVISK<longub>PESKEEHAIYTADLAM<ox>GTR-COOH	292	FR	AA	Long ubiquitination (11), Oxidation of M (27)		Long ubiquitination (11: 50.0, 15: 50.0), Oxidation of M (27: 100.0)	Oxidation of M (27: 73.59846669861044)	1	3.27116	64.8026
3019	Q5T5Y3	Single Protein	VKEHEDKDDASGR	2	NH2-VK<ub>EHEDK<longub>DDASGR-COOH	779	MK	SS	Long ubiquitination (7), Ubiquitination of K (2)		Long ubiquitination (2: 0.009719094655514446, 7: 99.99028090534448), Ubiquitination of K (2: 99.990800811071, 7: 0.009199188929002735)	Long ubiquitination (7: 28.961828715497163), Ubiquitination of K (2: 28.961828715497163)	1	11.7246	96.7638
3025	P78527	Single Protein	HECMAPLTALVKHMHRSLGPPQGEEDSVPR	2	NH2-HEC<cmm>MAPLTALVK<ub>HMHRSLGPPQGEEDSVPR-COOH	2091	NR	DL	Carbamidomethylation of C (3), Ubiquitination of K (12)		Carbamidomethylation of C (3: 100.0), Ubiquitination of K (12: 100.0)	Carbamidomethylation of C (3: 98.22712026832774), Ubiquitination of K (12: 98.22712026832774)	1	14.4521	98.8304
3027	Q15910	Related Proteins	LWAAHCRKIQLK	2	NH2-LWAAHCRKIQLK<ub>-COOH	498; 499	HR; HR	KD; KD	Ubiquitination of K (12)		Ubiquitination of K (8: 0.03845973463475392, 12: 99.96154026536524)	Ubiquitination of K (8: 12.484700122399017)	1	3.0103	61.4094
3038	Q9ULK2	Single Protein	IPCLSAAAAEGTGKKQQEGR	2	NH2-IPC<cmm>LSAAAAEGTGKK<longub>QQEGR-COOH	8	SR	AM	Carbamidomethylation of C (3), Long ubiquitination (15)		Carbamidomethylation of C (3: 100.0), Long ubiquitination (14: 50.0, 15: 50.0)	Carbamidomethylation of C (3: 81.40872065165308), Long ubiquitination (15: 42.764734068040255)	1	4.26259	76.873
3089	Q14232	Single Protein	IGTNQMAVCAKAQNKPFYVVAESFKFVR	2	NH2-IGTNQMAVC<cmm>AK<ub>AQNK<ub>PFYVVAESFKFVR-COOH	210	NK	LF	Carbamidomethylation of C (9), Ubiquitination of K (11, 15)		Carbamidomethylation of C (9: 100.0), Ubiquitination of K (11: 66.66666666666666, 15: 66.66666666666666, 25: 66.66666666666666)	Carbamidomethylation of C (9: 76.85673215141351)	1	3.94062	69.3333
3118	P0DMV8	Related Proteins	STGKANKITITNDK	2	NH2-STGK<ub>ANKITITNDK-COOH	494; 494; 496	DK; DK; DR	GR; GR; GR	Ubiquitination of K (4)		Ubiquitination of K (4: 99.9766853105528, 7: 0.023314686434884335, 14: 3.0123283446430815E-9)	Ubiquitination of K (4: 12.634983624539176)	1	5.37537	79.8658
3119	Q92820	Single Protein	KPIIGILMQK	0	NH2-KPIIGILMQK<ub>-COOH	33	AK	CR	Ubiquitination of K (10)		Ubiquitination of K (1: 1.1393941625824126E-10, 10: 100.0)	Ubiquitination of K (10: 14.518447532343082)	3	9.43192	91.1184
3135	Q14005	Single Protein	SFEILVRKPMSSKPKPPPRK	2	NH2-SFEILVRK<ub>PMSSK<ub>PK<ub>PPPRK<ub>-COOH	584	KK	YF	Ubiquitination of K (8, 20, 13, 15)		Ubiquitination of K (8: 100.0, 13: 100.0, 15: 100.0, 20: 100.0)	Ubiquitination of K (8: 61.0924772400575, 13: 61.0924772400575, 15: 61.0924772400575, 20: 61.0924772400575)	1	3.08934	63.8796
3150	Q9HCE5	Single Protein	EHCLMGIK	0	NH2-EHCLMGIK<longub>-COOH	286	TK	GT	Long ubiquitination (8)		Long ubiquitination (8: 100.0)	Long ubiquitination (8: 20.028749401054146)	1	4.88551	78.2895
3155	A6NFI3	Single Protein	HQWAHAEEKPHRCPDCGKGFGHSSDFK	2	NH2-HQWAHAEEKPHRC<cmm>PDCGK<ub>GFGHSSDFK-COOH	821	TR	RH	Carbamidomethylation of C (13), Ubiquitination of K (18)		Carbamidomethylation of C (13: 99.83981801440247, 16: 0.16018198559753688), Ubiquitination of K (9: 0.08220530553128613, 18: 49.95889734723436, 27: 49.95889734723436)	Carbamidomethylation of C (13: 42.323305804411284), Ubiquitination of K (18: 71.53809295639675)	1	6.07942	86.711
3172	P86790	Related Proteins	FLTGPLNLNDPDAKCRFPK	2	NH2-FLTGPLNLNDPDAKC<cmm>RFPK<ub>-COOH	282; 282	GR; GR	IF; IF	Carbamidomethylation of C (15), Ubiquitination of K (19)		Carbamidomethylation of C (15: 100.0), Ubiquitination of K (14: 7.384013543703123E-6, 19: 99.99999261598647)	Carbamidomethylation of C (15: 86.58361284139914), Ubiquitination of K (19: 64.92573071394347)	1	5.55913	80.5369
3235	Q8IX15	Single Protein	DKPPPIALIASSCK	0	NH2-DK<longub>PPPIALIASSC<cmm>K<ub>-COOH	261	AR	EE	Carbamidomethylation of C (13), Long ubiquitination (2), Ubiquitination of K (14)		Carbamidomethylation of C (13: 100.0), Long ubiquitination (2: 100.0, 14: 6.231444435727399E-14), Ubiquitination of K (2: 7.862973438097685E-17, 14: 100.0)	Carbamidomethylation of C (13: 67.36942980354577), Long ubiquitination (2: 67.36942980354577), Ubiquitination of K (14: 67.36942980354577)	2	4.54421	76.412
3238	A6NDI0	Related Proteins	AEYQKMPAFHHEEEKHNLEMLK	2	NH2-AEYQK<longub>MPAFHHEEEKHNLEM<ox>LK-COOH	181; 181; 181; 181	IR; IR; IR; IR	KK; KK; KK; KK	Long ubiquitination (5), Oxidation of M (20)		Long ubiquitination (5: 99.99997086200139, 15: 2.913799861273198E-5, 22: 1.0255874780495789E-16), Oxidation of M (6: 1.7752138659929696E-8, 20: 99.99999998224787)	Long ubiquitination (5: 73.55055103018687), Oxidation of M (20: 73.55055103018687)	1	3.10878	63.878
3268	Q5H9R4	Single Protein	AETHILAEKETEINR	1	NH2-AETHILAEK<ub>ETEINR-COOH	294	TK	VM	Ubiquitination of K (9)		Ubiquitination of K (9: 100.0)	Ubiquitination of K (9: 27.934834690943944)	1	7.10399	87.9195
3275	Q8N4X5	Single Protein	KSCLAELLR	1	NH2-K<ub>SC<cmm>LAELLR-COOH	34	VK	LY	Carbamidomethylation of C (3), Ubiquitination of K (1)		Carbamidomethylation of C (3: 100.0), Ubiquitination of K (1: 100.0)	Carbamidomethylation of C (3: 26.353617632965975), Ubiquitination of K (1: 26.353617632965975)	1	6.73416	86.8687
3280	O60486	Single Protein	KHENEFNEEVALTEIYK	1	NH2-K<ub>HENEFNEEVALTEIYK<ub>-COOH	1510	SK	YI	Ubiquitination of K (1, 17)		Ubiquitination of K (1: 100.0, 17: 100.0)	Ubiquitination of K (1: 65.97987541926209, 17: 65.97987541926209)	1	3.25189	64.628
3288	P35580	Single Protein	DELADEITNSASGKSALLDEKR	2	NH2-DELADEITNSASGK<ub>SALLDEK<ub>R-COOH	1711	ER	RL	Ubiquitination of K (21, 14)		Ubiquitination of K (14: 100.0, 21: 100.0)	Ubiquitination of K (14: 89.02731193100144, 21: 89.02731193100144)	1	6.40735	87.4172
3300	P15924	Single Protein	GLQDSIRKK	2	NH2-GLQDSIRK<ub>K<longub>-COOH	394	LK	YP	Long ubiquitination (9), Ubiquitination of K (8)		Long ubiquitination (8: 50.0, 9: 50.0), Ubiquitination of K (8: 50.0, 9: 50.0)		1	3.19128	65.1163
3301	P17019	Single Protein	HKVIHTEDKPYK	1	NH2-HK<ub>VIHTEDK<ub>PYK<ub>-COOH	374	TK	CE	Ubiquitination of K (12, 9, 2)		Ubiquitination of K (2: 100.0, 9: 100.0, 12: 100.0)	Ubiquitination of K (2: 46.76569238140872, 9: 46.76569238140872, 12: 46.76569238140872)	1	11.5949	96.633
3322	P06396	Single Protein	VVQGKEPAHLMSLFGGKPMIIYKGGTSR	2	NH2-VVQGKEPAHLM<ox>SLFGGK<longub>PMIIYKGGTSR-COOH	526	SR	EG	Long ubiquitination (17), Oxidation of M (11)		Long ubiquitination (5: 4.7774551020597904E-5, 17: 99.99995218385244, 23: 4.159654277348004E-8), Oxidation of M (11: 99.99999996678376, 19: 3.3216239755190354E-8)	Long ubiquitination (17: 99.04168663152852), Oxidation of M (11: 99.04168663152852)	1	17.4624	98.3553
3333	Q969F0	Single Protein	VWNMTATRPKKMGSQLPKPR	2	NH2-VWNM<ox>TATRPKKMGSQLPK<longub>PR-COOH	67	KR	ML	Long ubiquitination (18), Oxidation of M (4)		Long ubiquitination (10: 33.333333333333336, 11: 33.333333333333336, 18: 33.333333333333336), Oxidation of M (4: 99.99999773232457, 12: 2.2676754302907215E-6)	Long ubiquitination (18: 3.7907242983891978), Oxidation of M (12: 72.58407575548391)	1	5.03207	79.538
3353	O95696	Single Protein	GKPALVRR	1	NH2-GK<ub>PALVRR-COOH	876	GR	HT	Ubiquitination of K (2)		Ubiquitination of K (2: 100.0)	Ubiquitination of K (2: 65.54863440344994)	3	31.3619	99.6633
3369	B2RXH8	Related Proteins	QELTQIKQKVDSLLENLEK	2	NH2-QELTQIK<ub>QK<ub>VDSLLENLEK-COOH	185; 185; 185; 185	IK; IK; IK; IK	IE; IE; IE; IE	Ubiquitination of K (7, 9)		Ubiquitination of K (7: 66.66666666666666, 9: 66.66666666666666, 19: 66.66666666666666)	Ubiquitination of K (7: 85.33314252821074, 9: 66.98610445615716)	1	11.4418	96.6216
3371	Q9P2J8	Single Protein	IICKEMKGSK	2	NH2-IICK<ub>EM<ox>KGSK<ub>-COOH	246	GK	AI	Oxidation of M (6), Ubiquitination of K (10, 4)		Oxidation of M (6: 100.0), Ubiquitination of K (4: 50.00000011551907, 7: 50.00000011551907, 10: 99.99999976896189)	Oxidation of M (6: 39.626257786296115), Ubiquitination of K (4: 25.272081060631457, 10: 39.626257786296115)	1	11.7246	96.7638
3380	Q9Y4F1	Single Protein	FFPPDHTQLQEELTRYLFALQVKQDLAQGR	2	NH2-FFPPDHTQLQEELTRYLFALQVK<longub>QDLAQGR-COOH	119	VK	LT	Long ubiquitination (23)		Long ubiquitination (23: 100.0)	Long ubiquitination (23: 81.88787733588883)	1	5.28761	79.798
3388	Q53HL2	Single Protein	HSIAQLDPEALGNIKKLSNR	2	NH2-HSIAQLDPEALGNIK<ub>K<ub>LSNR-COOH	249	QR	LA	Ubiquitination of K (16, 15)		Ubiquitination of K (15: 100.0, 16: 100.0)	Ubiquitination of K (15: 85.67321514135122, 16: 85.67321514135122)	1	5.9243	85.2843
3400	P42356	Single Protein	LQSKTSSKVIIAHLPLLICCLQGLGR	2	NH2-LQSK<ub>TSSKVIIAHLPLLICC<cmm>LQGLGR-COOH	466	EK	LC	Carbamidomethylation of C (20), Ubiquitination of K (4)		Carbamidomethylation of C (19: 50.0, 20: 50.0), Ubiquitination of K (4: 99.81444612699163, 8: 0.18555387300837037)	Carbamidomethylation of C (20: 18.615237182558698), Ubiquitination of K (4: 66.79583112074972)	1	4.29227	75.3378
3439	Q8N6M8	Single Protein	EMPTHLSLGAESK	0	NH2-EMPTHLSLGAESK<longub>-COOH	22	QK	AE	Long ubiquitination (13)		Long ubiquitination (13: 100.0)	Long ubiquitination (13: 81.79204599904169)	1	5.28761	79.798
3456	Q96NL6	Single Protein	EKKAVEEELEK	2	NH2-EK<ub>KAVEEELEK<longub>-COOH	421	IK	IY	Long ubiquitination (11), Ubiquitination of K (2)		Long ubiquitination (2: 1.9785258616487928E-8, 3: 2.5291618800299198E-5, 11: 99.99997468859594), Ubiquitination of K (2: 99.95683944155658, 3: 0.04316054017355957, 11: 1.826986474926608E-8)	Long ubiquitination (11: 82.84619070436032), Ubiquitination of K (2: 55.67149467943131)	1	4.42828	76.0539
3498	Q9P2D3	Single Protein	ALSTPYIHSLAPIVVEKLKAVER	2	NH2-ALSTPYIHSLAPIVVEK<longub>LK<ub>AVER-COOH	1918	NR	NR	Long ubiquitination (17), Ubiquitination of K (19)		Long ubiquitination (17: 99.99998216219157, 19: 1.7837808427319908E-5), Ubiquitination of K (17: 1.7067386865361704E-5, 19: 99.99998293261314)	Long ubiquitination (17: 90.08145663632008), Ubiquitination of K (19: 90.08145663632008)	1	7.25056	88.0795
3517	P42658	Single Protein	AQNVSILTLCDATTGVCTKK	1	NH2-AQNVSILTLCDATTGVC<cmm>TK<ub>K-COOH	402	NR	HE	Carbamidomethylation of C (17), Ubiquitination of K (19)		Carbamidomethylation of C (10: 50.0, 17: 50.0), Ubiquitination of K (19: 50.0, 20: 50.0)	Carbamidomethylation of C (17: 68.51940584571155)	1	4.9221	79.4318
3518	Q86U44	Single Protein	KHAASDVDLEIESLLNQQSTK	1	NH2-K<ub>HAASDVDLEIESLLNQQSTK<ub>-COOH	215	SR	EQ	Ubiquitination of K (1, 21)		Ubiquitination of K (1: 100.0, 21: 100.0)	Ubiquitination of K (1: 68.56732151413512, 21: 68.56732151413512)	1	4.9221	79.4318
3535	O95221	Single Protein	MLADLLSEKK	1	NH2-MLADLLSEK<ub>K<ub>-COOH	81	PK	TI	Ubiquitination of K (9, 10)		Ubiquitination of K (9: 100.0, 10: 100.0)	Ubiquitination of K (9: 26.54528030666028, 10: 26.54528030666028)	1	6.60574	87.5
3536	P42025	Single Protein	LAPKDIKIK	2	NH2-LAPK<ub>DIK<ub>IK-COOH	321	KK	IS	Ubiquitination of K (4, 7)		Ubiquitination of K (4: 99.999998277741, 7: 99.98904864429369, 9: 0.01095307796534187)	Ubiquitination of K (4: 10.637278390033543, 7: 10.637278390033543)	1	3.0103	61.4094
3554	Q9BYW2	Single Protein	KLFEQEVAQR	1	NH2-K<ub>LFEQEVAQR-COOH	2123	RR	EA	Ubiquitination of K (1)		Ubiquitination of K (1: 100.0)	Ubiquitination of K (1: 59.99041686631528)	2	7.37682	88.2549
3578	Q04637	Single Protein	CLMALKVPTTEKPTVTVNFR	1	NH2-CLM<ox>ALK<longub>VPTTEKPTVTVNFR-COOH	821	CR	KL	Long ubiquitination (6), Oxidation of M (3)		Long ubiquitination (6: 99.99990513751453, 12: 9.486248546404539E-5), Oxidation of M (3: 100.0)	Long ubiquitination (12: 0.6229036895064682), Oxidation of M (3: 92.76473406804024)	1	7.80103	88.5522
3596	P51148	Single Protein	NWVKELQRQASPNIVIALAGNK	2	NH2-NWVK<longub>ELQRQASPNIVIALAGNK<ub>-COOH	114	AK	AD	Long ubiquitination (4), Ubiquitination of K (22)		Long ubiquitination (4: 99.99999999955241, 22: 4.475755957675764E-10), Ubiquitination of K (4: 4.281587995929748E-10, 22: 99.99999999957183)	Long ubiquitination (4: 81.69621466219455), Ubiquitination of K (22: 81.69621466219455)	1	5.28761	79.798
3638	Q8NG48	Single Protein	VMTTRILSVKTEFHAK	2	NH2-VMTTRILSVK<longub>TEFHAK<longub>-COOH	98	IK	EQ	Long ubiquitination (16, 10)		Long ubiquitination (10: 100.0, 16: 100.0)	Long ubiquitination (10: 83.99616674652611, 16: 83.99616674652611)	1	5.70154	80.1347
3641	O75818	Single Protein	KIMKFIVSIDLMELSLNLDSK	2	NH2-K<ub>IM<ox>K<ub>FIVSIDLMELSLNLDSK-COOH	140	GR	KY	Oxidation of M (3), Ubiquitination of K (4, 1)		Oxidation of M (3: 99.93440043500156, 12: 0.06559956499842985), Ubiquitination of K (1: 99.99999999999993, 4: 99.99999999999993, 21: 1.1219395551007081E-13)	Oxidation of M (3: 63.027181460725004), Ubiquitination of K (1: 87.58984187829421, 4: 87.58984187829421)	1	6.15911	86.9346
3642	Q9H0M4	Single Protein	EKEEELEKEEGEK	2	NH2-EKEEELEK<longub>EEGEK-COOH	457	KK	TD	Long ubiquitination (8)		Long ubiquitination (2: 2.0721129080959356E-6, 8: 99.99999585577417, 13: 2.0721129080959356E-6)	Long ubiquitination (8: 60.038332534738856)	1	3.07165	63.7584
3646	Q68DQ2	Single Protein	GQKCVLEEGEKVLNR	2	NH2-GQKCVLEEGEK<longub>VLNR-COOH	2346	FR	DW	Long ubiquitination (11)		Long ubiquitination (3: 1.0875615092000154E-12, 11: 99.9999999999989)	Long ubiquitination (11: 8.960229995208435)	1	2.96067	60.2694
3677	Q70EK9	Single Protein	KKSVYTVGLR	2	NH2-K<ub>KSVYTVGLR-COOH	354	RR	GL	Ubiquitination of K (1)		Ubiquitination of K (1: 50.0, 2: 50.0)		1	4.84482	78.3333
3706	Q9NS87	Single Protein	ENETLKSDLNNLMELLEAEKER	2	NH2-ENETLK<ub>SDLNNLM<ox>ELLEAEK<longub>ER-COOH	891	KK	NN	Long ubiquitination (20), Oxidation of M (13), Ubiquitination of K (6)		Long ubiquitination (6: 5.176963747746423E-4, 20: 99.99948230362523), Oxidation of M (13: 100.0), Ubiquitination of K (6: 99.99952369320097, 20: 4.7630679903765827E-4)	Long ubiquitination (6: 77.57546717776714), Oxidation of M (13: 77.57546717776714), Ubiquitination of K (20: 77.57546717776714)	1	3.94062	69.3333
3722	Q9NY65	Single Protein	AGTYRQLFHPEQLITGKEDAANNYAR	2	NH2-AGTYRQLFHPEQLITGK<longub>EDAANNYAR-COOH	80	VR	GH	Long ubiquitination (17)		Long ubiquitination (17: 100.0)	Long ubiquitination (17: 88.06899856252994)	1	6.40735	87.4172
3725	Q8NEZ4	Single Protein	TQRTGEKAAPR	2	NH2-TQRTGEK<ub>AAPR-COOH	3854	KR	SK	Ubiquitination of K (7)		Ubiquitination of K (7: 100.0)	Ubiquitination of K (7: 15.141351221849542)	1	2.97396	60.9272
3732	O75155	Single Protein	KCPKEMGPHVPNVTSLCLQYIK	2	NH2-K<ub>C<cmm>PKEM<ox>GPHVPNVTSLC<cmm>LQYIK-COOH	288	LR	HD	Carbamidomethylation of C (17, 2), Oxidation of M (6), Ubiquitination of K (1)		Carbamidomethylation of C (2: 100.0, 17: 100.0), Oxidation of M (6: 100.0), Ubiquitination of K (1: 49.99988320687863, 4: 49.99988320687863, 22: 2.3358624273689792E-4)	Carbamidomethylation of C (2: 94.01054144705319, 17: 94.01054144705319), Oxidation of M (6: 94.01054144705319)	1	8.85907	89.5623
3746	P11177	Single Protein	DFLIPIGKAKIER	2	NH2-DFLIPIGK<ub>AKIER-COOH	220	SK	QG	Ubiquitination of K (8)		Ubiquitination of K (8: 50.0, 10: 50.0)	Ubiquitination of K (8: 10.44561571633924)	1	3.04695	63.7584
3761	Q14914	Single Protein	VAYLQKLGFDVVFNYK	1	NH2-VAYLQK<ub>LGFDVVFNYK<ub>-COOH	179	EK	TV	Ubiquitination of K (16, 6)		Ubiquitination of K (6: 100.0, 16: 100.0)	Ubiquitination of K (6: 9.151892668902729, 16: 9.151892668902729)	1	2.98555	61.1031
3765	B3KU38	Related Proteins	SPVADLLPHMPHISECLMKRSLKPTDLR	2	NH2-SPVADLLPHMPHISEC<cmm>LM<ox>K<ub>RSLKPTDLR-COOH	469; 393	KK; KK	DM; DM	Carbamidomethylation of C (16), Oxidation of M (18), Ubiquitination of K (19)		Carbamidomethylation of C (16: 100.0), Oxidation of M (10: 1.9758725841404983E-6, 18: 100.0), Ubiquitination of K (19: 99.99363487018171, 23: 0.013391434521102787)	Carbamidomethylation of C (16: 85.48155246765691), Oxidation of M (18: 38.44406615210537)	2	8.68724	89.5238
3774	Q15648	Single Protein	SGGHLMNLKYYVSPSDLLDDK	1	NH2-SGGHLM<ox>NLKYYVSPSDLLDDK<ub>-COOH	215	PR	TA	Long ubiquitination (21), Oxidation of M (6), Ubiquitination of K (21)		Long ubiquitination (9: 0.010666857124463292, 21: 99.98933314287554), Oxidation of M (6: 100.0), Ubiquitination of K (9: 0.009548191557317235, 21: 99.99045180844269)	Long ubiquitination (21: 88.69190225203641), Oxidation of M (6: 88.69190225203641), Ubiquitination of K (9: 88.69190225203641)	1	6.40735	87.4172
3794	Q9UBN4	Single Protein	RHWAVKMVTCFIIGLLFPVFSVCYLIAPK	2	NH2-RHWAVK<longub>M<ox>VTCFIIGLLFPVFSVC<cmm>YLIAPK-COOH	324	RR	SP	Carbamidomethylation of C (23), Long ubiquitination (6), Oxidation of M (7)		Carbamidomethylation of C (10: 0.12948065909722978, 23: 99.87051934090276), Long ubiquitination (6: 99.8683118489181, 29: 0.13168815108190512), Oxidation of M (7: 100.0)	Carbamidomethylation of C (23: 77.2400574988021), Long ubiquitination (6: 77.2400574988021), Oxidation of M (7: 77.2400574988021)	1	4.03822	72.4249
3803	Q8IV61	Single Protein	LSLVLEPRNSK	1	NH2-LSLVLEPRNSK<ub>-COOH	376	YK	SQ	Ubiquitination of K (11)		Ubiquitination of K (11: 100.0)	Ubiquitination of K (11: 13.799712505989458)	1	3.59291	66.1042
3818	Q10471	Single Protein	KLSCKPFKWYLENVYPELR	2	NH2-K<ub>LSC<cmm>KPFK<ub>WYLENVYPELR-COOH	420	RK	VP	Carbamidomethylation of C (4), Ubiquitination of K (8, 1)		Carbamidomethylation of C (4: 100.0), Ubiquitination of K (1: 99.99819586487774, 5: 0.0036082702445457246, 8: 99.99819586487774)	Carbamidomethylation of C (4: 95.59175850503114), Ubiquitination of K (1: 24.700527072352656, 5: 1.1978917105893625)	1	12.3436	97.3684
3822	P42568	Single Protein	EHKEKPSKDSR	2	NH2-EHK<ub>EK<ub>PSKDSR-COOH	202	MK	EH	Ubiquitination of K (3, 5)		Ubiquitination of K (3: 99.99999706251292, 5: 50.00000146874353, 8: 50.00000146874353)	Ubiquitination of K (3: 15.093435553425971, 5: 15.093435553425971)	1	4.04571	72.3333
3831	Q9BYJ1	Single Protein	LCVTTGPYLRAGTLDNISVTLVGTCGESPK	1	NH2-LC<cmm>VTTGPYLRAGTLDNISVTLVGTCGESPK<ub>-COOH	6	YR	QR	Carbamidomethylation of C (2), Ubiquitination of K (30)		Carbamidomethylation of C (2: 100.0, 25: 3.8008524103848004E-17), Ubiquitination of K (30: 100.0)	Carbamidomethylation of C (2: 89.8418782942022), Ubiquitination of K (30: 89.8418782942022)	1	7.04852	88.0795
3851	P06133	Single Protein	WAELPKDTFWSYFSQVQEIMWTFNDILR	1	NH2-WAELPK<longub>DTFWSYFSQVQEIM<ox>WTFNDILR-COOH	97	KR	KF	Long ubiquitination (6), Oxidation of M (20)		Long ubiquitination (6: 100.0), Oxidation of M (20: 100.0)	Long ubiquitination (6: 73.64638236703402), Oxidation of M (20: 73.64638236703402)	1	3.35468	65.6766
3852	Q8WXE0	Single Protein	QRPKPAGPPPR	0	NH2-QRPK<ub>PAGPPPR-COOH	962	IK	ET	Ubiquitination of K (4)		Ubiquitination of K (4: 100.0)	Ubiquitination of K (4: 16.19549592716818)	1	4.77121	77.3649
3861	A8MYV0	Single Protein	LFTMNGHLLGDSKDLQDNHFYVAVGLETFK	1	NH2-LFTM<ox>NGHLLGDSK<longub>DLQDNHFYVAVGLETFK-COOH	183	RK	YF	Long ubiquitination (13), Oxidation of M (4)		Long ubiquitination (13: 99.99986283358348, 30: 1.3716641652921797E-4), Oxidation of M (4: 100.0)	Long ubiquitination (13: 34.860830939464094), Oxidation of M (4: 80.30666027791088)	1	4.97047	79.2929
3887	Q9H2C8	Single Protein	LFQTCISHICAVLVFYIPIISLTMVHRFGK	1	NH2-LFQTC<cmm>ISHIC<cmm>AVLVFYIPIISLTM<ox>VHRFGK<longub>-COOH	246	HK	HL	Carbamidomethylation of C (10, 5), Long ubiquitination (30), Oxidation of M (24)		Carbamidomethylation of C (5: 100.0, 10: 100.0), Long ubiquitination (30: 100.0), Oxidation of M (24: 100.0)	Carbamidomethylation of C (5: 76.9046478198371, 10: 76.9046478198371), Long ubiquitination (30: 76.9046478198371), Oxidation of M (24: 76.9046478198371)	1	4.03822	72.4249
3915	Q9NR12	Single Protein	FLEALGFSWHDTCFVCAICQINLEGK	0	NH2-FLEALGFSWHDTCFVC<cmm>AICQINLEGK<ub>-COOH	413	DR	TF	Carbamidomethylation of C (16), Ubiquitination of K (26)		Carbamidomethylation of C (13: 0.02295812908465362, 16: 99.9540837418307, 19: 0.02295812908465362), Ubiquitination of K (26: 100.0)	Ubiquitination of K (26: 93.53138476281744)	1	8.43155	89.5238
3921	Q96AA8	Single Protein	LMDEIKAKDR	2	NH2-LM<ox>DEIK<longub>AK<ub>DR-COOH	209	RR	II	Long ubiquitination (6), Oxidation of M (2), Ubiquitination of K (8)		Long ubiquitination (6: 50.0, 8: 50.0), Oxidation of M (2: 100.0), Ubiquitination of K (6: 50.0, 8: 50.0)	Long ubiquitination (6: 6.935823177907141), Oxidation of M (2: 16.003833253473886), Ubiquitination of K (8: 6.935823177907141)	1	3.43153	65.6566
3925	P48634	Single Protein	GVGGTPRDSAGVSPFPPK	1	NH2-GVGGTPRDSAGVSPFPPK<ub>-COOH	1542	VR	RR	Ubiquitination of K (18)		Ubiquitination of K (18: 100.0)	Ubiquitination of K (18: 9.151892668902729)	1	3.27359	64.527
3933	Q15911	Single Protein	DYLNSDGSAKSSCVSKDVPNNVDLSK	2	NH2-DYLNSDGSAK<longub>SSCVSK<longub>DVPNNVDLSK<ub>-COOH	243	NK	FD	Long ubiquitination (16, 10), Ubiquitination of K (26)		Long ubiquitination (10: 99.99999999999572, 16: 99.99999999853729, 26: 1.467016711113894E-9), Ubiquitination of K (10: 0.1553934225062815, 16: 0.1553934225062815, 26: 99.68921315498743)	Long ubiquitination (10: 77.09631049353138, 16: 77.09631049353138), Ubiquitination of K (26: 77.09631049353138)	1	4.03822	72.4249
3974	Q5T5Y3	Single Protein	DANILSEQMSLK	0	NH2-DANILSEQM<ox>SLK<ub>-COOH	1187	SK	EV	Oxidation of M (9), Ubiquitination of K (12)		Oxidation of M (9: 100.0), Ubiquitination of K (12: 100.0)	Oxidation of M (9: 23.23909918543363), Ubiquitination of K (12: 23.23909918543363)	1	5.85461	85.2843
3986	Q8WTR4	Single Protein	GAPMLAPEHTLMSFRKALEQK	2	NH2-GAPMLAPEHTLM<ox>SFRK<longub>ALEQK<longub>-COOH	235	HR	LY	Long ubiquitination (16, 21), Oxidation of M (12)		Long ubiquitination (16: 100.0, 21: 100.0), Oxidation of M (4: 0.21069760024119752, 12: 99.78930239975881)	Long ubiquitination (16: 80.97747963584092, 21: 80.97747963584092), Oxidation of M (12: 80.97747963584092)	1	5.15796	79.5987
3988	Q13217	Single Protein	LDQDHKRCFAHYK	2	NH2-LDQDHKRC<cmm>FAHYK<ub>-COOH	251	LK	QV	Carbamidomethylation of C (8), Ubiquitination of K (13)		Carbamidomethylation of C (8: 100.0), Ubiquitination of K (6: 1.5279363582016294E-5, 13: 99.99998472063642)	Carbamidomethylation of C (8: 10.44561571633924), Ubiquitination of K (13: 10.44561571633924)	1	3.12119	63.6364
3993	Q12772	Single Protein	ALEVTESPLVKAIFHACRAMHASLPGK	2	NH2-ALEVTESPLVK<ub>AIFHACRAMHASLPGK-COOH	908	PK	AD	Ubiquitination of K (11)		Ubiquitination of K (11: 99.97671438747318, 27: 0.023285612526824005)	Ubiquitination of K (11: 47.7620672372138)	1	11.3566	96.6216
4007	Q6PJG6	Single Protein	IMDHVEESLCSAATPK	0	NH2-IMDHVEESLCSAATPK<ub>-COOH	198	QK	VT	Ubiquitination of K (16)		Ubiquitination of K (16: 100.0)	Ubiquitination of K (16: 8.864398658361283)	1	3.27359	64.527
4008	Q8NI17	Single Protein	KGIICNYTIFYQAEGGKGFSK	2	NH2-K<longub>GIIC<cmm>NYTIFYQAEGGK<longub>GFSK<longub>-COOH	450	ER	TV	Carbamidomethylation of C (5), Long ubiquitination (1, 17, 21)		Carbamidomethylation of C (5: 100.0), Long ubiquitination (1: 100.0, 17: 100.0, 21: 100.0)	Carbamidomethylation of C (5: 61.140392908481076), Long ubiquitination (1: 61.140392908481076, 17: 61.140392908481076, 21: 61.140392908481076)	2	4.07512	72.3333
4016	Q9H6R6	Single Protein	KCVEKCPCDAETDQAPEGEK	2	NH2-KC<cmm>VEK<longub>C<cmm>PC<cmm>DAETDQAPEGEK-COOH	391	PR	KN	Carbamidomethylation of C (8, 2, 6), Long ubiquitination (5)		Carbamidomethylation of C (2: 100.0, 6: 100.0, 8: 100.0), Long ubiquitination (1: 0.03932637953999168, 5: 99.96067361022448, 20: 1.0235550333491863E-8)	Carbamidomethylation of C (2: 60.85289889793963, 6: 60.85289889793963, 8: 76.23382846190705), Long ubiquitination (5: 60.85289889793963)	1	3.70581	67.7741
4017	Q99457	Single Protein	ATEAKARAAVR	2	NH2-ATEAK<ub>ARAAVR-COOH	268	PK	ET	Ubiquitination of K (5)		Ubiquitination of K (5: 100.0)	Ubiquitination of K (5: 22.616195495927172)	1	5.44068	80.4714
4022	P04114	Single Protein	KSISAALEHK	1	NH2-K<ub>SISAALEHK-COOH	1958	SR	VS	Ubiquitination of K (1)		Ubiquitination of K (1: 100.0, 10: 2.1875099745782108E-17)	Ubiquitination of K (1: 68.56732151413512)	3	35.2406	100
4032	Q02252	Single Protein	VCNLIDSGTKEGASILLDGRK	2	NH2-VC<cmm>NLIDSGTK<longub>EGASILLDGRK<ub>-COOH	367	ER	IK	Carbamidomethylation of C (2), Long ubiquitination (10), Ubiquitination of K (21)		Carbamidomethylation of C (2: 100.0), Long ubiquitination (10: 99.9999999999305, 21: 6.950044736571148E-11), Ubiquitination of K (10: 6.950044736571148E-11, 21: 99.9999999999305)	Carbamidomethylation of C (2: 73.59846669861044), Long ubiquitination (10: 73.59846669861044), Ubiquitination of K (21: 73.59846669861044)	1	3.35468	65.6766
4049	Q15057	Single Protein	LCIAMIDTGKAFCVANKQFMNGIR	2	NH2-LC<cmm>IAM<ox>IDTGKAFC<cmm>VANK<longub>QFMNGIR-COOH	41	VK	DL	Carbamidomethylation of C (2, 13), Long ubiquitination (17), Oxidation of M (5)		Carbamidomethylation of C (2: 100.0, 13: 100.0), Long ubiquitination (10: 1.4902885410157005E-5, 17: 99.99998509711459), Oxidation of M (5: 99.95485303003319, 20: 0.04514696996681474)	Carbamidomethylation of C (2: 86.77527551509343, 13: 86.77527551509343), Long ubiquitination (10: 23.496272638775125), Oxidation of M (5: 77.3463327455417)	1	5.70154	80.1347
4061	A8MZH6	Single Protein	SEMPLSCVVHKQKCQ	2	NH2-SEM<ox>PLSC<cmm>VVHK<ub>QK<ub>CQ-COOH	109	VR		Carbamidomethylation of C (7), Oxidation of M (3), Ubiquitination of K (11, 13)		Carbamidomethylation of C (7: 99.99999999999825, 14: 3.803697611458036E-8), Oxidation of M (3: 100.0), Ubiquitination of K (11: 100.0, 13: 100.0)	Carbamidomethylation of C (7: 10.250737463126846), Oxidation of M (3: 10.250737463126846), Ubiquitination of K (11: 10.250737463126846, 13: 10.250737463126846)	2	4.88959	79.0354
4076	Q9Y2Q0	Single Protein	LEESYELIEKNLQLLGATAIEDK	1	NH2-LEESYELIEK<ub>NLQLLGATAIEDK<ub>-COOH	640	LK	LQ	Ubiquitination of K (10, 23)		Ubiquitination of K (10: 100.0, 23: 100.0)	Ubiquitination of K (10: 92.52515572592237, 23: 92.52515572592237)	1	7.80103	88.5522
4083	P29622	Single Protein	FLNDTMAVYEAK	0	NH2-FLNDTM<ox>AVYEAK<longub>-COOH	155	AK	LF	Long ubiquitination (12), Oxidation of M (6)		Long ubiquitination (12: 100.0), Oxidation of M (6: 100.0)	Long ubiquitination (12: 87.11068519405846), Oxidation of M (6: 87.11068519405846)	1	20.7555	99.093
4088	P25054	Single Protein	QMSQQNLTKQTGLSKNASSIPR	2	NH2-QM<ox>SQQNLTK<ub>QTGLSK<ub>NASSIPR-COOH	2372	GR	SE	Oxidation of M (2), Ubiquitination of K (9, 15)		Oxidation of M (2: 100.0), Ubiquitination of K (9: 100.0, 15: 100.0)	Oxidation of M (2: 75.99425011978917), Ubiquitination of K (9: 75.99425011978917, 15: 75.99425011978917)	1	3.61533	66.1042
4091	P19544	Single Protein	KHTGEKPYQCDFK	1	NH2-K<ub>HTGEKPYQC<cmm>DFK-COOH	346	SR	DC	Carbamidomethylation of C (10), Ubiquitination of K (1)		Carbamidomethylation of C (10: 100.0), Ubiquitination of K (1: 99.99008904865528, 6: 49.9999998934544, 13: 2.1309119695061908E-7)	Carbamidomethylation of C (10: 59.367513176808814), Ubiquitination of K (1: 59.367513176808814)	2	3.67271	66.1074
4093	Q53EL6	Single Protein	SLWKSSTITVDQMK	1	NH2-SLWK<ub>SSTITVDQMK-COOH	389	LK	RG	Ubiquitination of K (4)		Ubiquitination of K (4: 99.99999998160028, 14: 1.839971650563912E-8)	Ubiquitination of K (4: 67.51317680881648)	1	3.42075	65.3283
16	P43235	Single Protein	AAKCRGYR	2	NH2-AAK<longub>C<cmm>RGYR-COOH	218	GK	EI	Carbamidomethylation of C (4), Long ubiquitination (3)		Carbamidomethylation of C (4: 100.0), Long ubiquitination (3: 100.0)	Carbamidomethylation of C (4: 45.66502463054187), Long ubiquitination (3: 45.66502463054187)	2	5.70321	83.5642
31	Q15784	Single Protein	MLTRLFSEPGLLSDVPK	1	NH2-M<ox>LTRLFSEPGLLSDVPK<ub>-COOH	1		FA	Oxidation of M (1), Ubiquitination of K (17)		Oxidation of M (1: 100.0), Ubiquitination of K (17: 100.0)	Oxidation of M (1: 66.2075750122971), Ubiquitination of K (17: 66.2075750122971)	1	4.45713	79.304
131	P16109	Single Protein	SGRWTDSPPMCEAIK	1	NH2-SGRWTDSPPMCEAIK<longub>-COOH	557	TR	CP	Long ubiquitination (15)		Long ubiquitination (15: 100.0)	Long ubiquitination (15: 72.412109375)	1	5.01664	82.4074
165	P05556	Single Protein	GECVCGQCVCRK	1	NH2-GECVC<cmm>GQC<cmm>VC<cmm>RK<ub>-COOH	529	NN	RD	Carbamidomethylation of C (8, 10, 5), Ubiquitination of K (12)		Carbamidomethylation of C (3: 0.07216534897574697, 5: 99.96392646350448, 8: 99.96392646350448, 10: 99.99998172401531), Ubiquitination of K (12: 100.0)	Carbamidomethylation of C (5: 49.73391388485729, 8: 49.73391388485729, 10: 49.73391388485729), Ubiquitination of K (12: 49.73391388485729)	1	4.69633	81.3406
178	P60709	Single Protein	DDDIAALVVDNGSGMCK	0	ace-DDDIAALVVDNGSGMCK<ub>-COOH	2	M	AG	Acetylation of protein N-term (1), Ubiquitination of K (17)		Acetylation of protein N-term (0: 100.0), Ubiquitination of K (17: 100.0)	Acetylation of protein N-term (1: 97.53573188762937), Ubiquitination of K (17: 97.53573188762937)	1	100	100
200	O15068	Single Protein	YTVVADHEKGGPDALR	1	NH2-YTVVADHEK<ub>GGPDALR-COOH	1060	GK	VR	Ubiquitination of K (9)		Ubiquitination of K (9: 100.0)	Ubiquitination of K (9: 69.24212598425197)	1	4.57747	80.3279
206	Q9UKS7	Single Protein	KPLSREDEIR	1	NH2-K<ub>PLSREDEIR-COOH	63	DR	GH	Ubiquitination of K (1)		Ubiquitination of K (1: 100.0)	Ubiquitination of K (1: 63.47009391992091)	1	4.23602	76.0589
215	Q8N103	Single Protein	NLAPGSVLPRALVLK	1	NH2-NLAPGSVLPRALVLK<longub>-COOH	444	IK	AF	Long ubiquitination (15)		Long ubiquitination (15: 100.0)	Long ubiquitination (15: 46.91478942213516)	3	7.19078	86.1947
279	Q9H9H5	Single Protein	DVPLTQYQRDFGLWTTPAGPK	1	NH2-DVPLTQYQRDFGLWTTPAGPK<longub>-COOH	63	GR	DP	Long ubiquitination (21)		Long ubiquitination (21: 100.0)	Long ubiquitination (21: 76.48794884407279)	1	5.72255	83.5793
285	P52824	Single Protein	LPPDSCPLLVFVNPK	0	NH2-LPPDSCPLLVFVNPK<ub>-COOH	582	AK	SG	Ubiquitination of K (15)		Ubiquitination of K (15: 100.0)	Ubiquitination of K (15: 69.24212598425197)	1	4.57747	80.3279
298	Q9BXM0	Single Protein	VPEMAVPEVRLPEVQLLK	1	NH2-VPEM<ox>AVPEVRLPEVQLLK<ub>-COOH	507	PK	VS	Oxidation of M (4), Ubiquitination of K (18)		Oxidation of M (4: 100.0), Ubiquitination of K (18: 100.0)	Oxidation of M (4: 58.04878048780488), Ubiquitination of K (18: 58.04878048780488)	2	4.46386	79.652
316	A2PYH4	Single Protein	WLSDFVAAQEKK	1	NH2-WLSDFVAAQEK<ub>K<ub>-COOH	894	TR	FA	Ubiquitination of K (12, 11)		Ubiquitination of K (11: 100.0, 12: 100.0)	Ubiquitination of K (11: 46.91478942213516, 12: 46.91478942213516)	1	4.11245	73.227
351	P09874	Single Protein	PDSGLEHSAHVLEKGGK	1	NH2-PDSGLEHSAHVLEK<ub>GGK<ub>-COOH	535	VD	VF	Ubiquitination of K (17, 14)		Ubiquitination of K (14: 100.0, 17: 100.0)	Ubiquitination of K (14: 98.86977886977887, 17: 98.86977886977887)	1	100	100
360	Q8TCN5	Single Protein	FLMNTEMEEGK	0	NH2-FLMNTEM<ox>EEGK<ub>-COOH	414	KR	DL	Oxidation of M (7), Ubiquitination of K (11)		Oxidation of M (3: 50.0, 7: 50.0), Ubiquitination of K (11: 100.0)	Oxidation of M (7: 49.2405683488486), Ubiquitination of K (11: 49.2405683488486)	1	4.25969	78.3486
368	Q8NCX0	Single Protein	EIVQERCNLEK	1	pyro-EIVQERCNLEK<ub>-COOH	487	EK	EL	Pyrolidone from E (1), Ubiquitination of K (11)		Pyrolidone from E (0: 100.0), Ubiquitination of K (11: 100.0)	Pyrolidone from E (1: 68.61493123772102), Ubiquitination of K (11: 68.61493123772102)	1	5.38391	82.9982
371	Q96M60	Single Protein	KIMLSDEMETEK	1	NH2-K<ub>IMLSDEMETEK<ub>-COOH	133	KK	NI	Ubiquitination of K (12, 1)		Ubiquitination of K (1: 100.0, 12: 100.0)	Ubiquitination of K (1: 67.25838264299803, 12: 67.25838264299803)	1	4.44452	78.9762
382	Q15751	Single Protein	ATMIPPVKLK	1	NH2-ATM<ox>IPPVK<ub>LK<ub>-COOH	2	M	WL	Oxidation of M (3), Ubiquitination of K (8, 10)		Oxidation of M (3: 100.0), Ubiquitination of K (8: 100.0, 10: 100.0)	Oxidation of M (3: 83.29286061194755), Ubiquitination of K (8: 83.29286061194755, 10: 83.29286061194755)	1	11.8833	96.1538
395	Q9UPR3	Single Protein	QGPPTGESSEPEAK	0	NH2-QGPPTGESSEPEAK<ub>-COOH	3	MS	VL	Ubiquitination of K (14)		Ubiquitination of K (14: 100.0)	Ubiquitination of K (14: 62.59842519685039)	1	4.35729	78.6106
398	O43301	Single Protein	DKEAGGSDGPR	1	NH2-DK<longub>EAGGSDGPR-COOH	3	MA	ET	Long ubiquitination (2)		Long ubiquitination (2: 100.0)	Long ubiquitination (2: 96.51448208149239)	1	100	100
446	O75382	Single Protein	VKSPGGPGSHVRQK	2	NH2-VK<ub>SPGGPGSHVRQK<ub>-COOH	435	RR	AV	Ubiquitination of K (2, 14)		Ubiquitination of K (2: 100.0, 14: 100.0)	Ubiquitination of K (2: 65.1208682782437, 14: 65.1208682782437)	1	3.9794	71.7668
469	Q15291	Single Protein	KGSCFLINTADRIIR	2	NH2-K<longub>GSCFLINTADRIIR-COOH	209	AR	VY	Long ubiquitination (1)		Long ubiquitination (1: 100.0)	Long ubiquitination (1: 67.25838264299803)	1	4.3834	78.8991
508	Q9NSA0	Single Protein	EEVASAKEPR	1	NH2-EEVASAK<ub>EPR-COOH	322	VK	SV	Ubiquitination of K (7)		Ubiquitination of K (7: 100.0)	Ubiquitination of K (7: 66.2075750122971)	2	8.69315	90.6934
553	Q96LA5	Single Protein	ELSVFKKFSDFLIQSAVLSDSGNYFCSTK	2	pyro-ELSVFK<ub>K<ub>FSDFLIQSAVLSDSGNYFCSTK<ub>-COOH	57	NK	GQ	Pyrolidone from E (1), Ubiquitination of K (29, 6, 7)		Pyrolidone from E (0: 100.0), Ubiquitination of K (6: 100.0, 7: 100.0, 29: 100.0)	Pyrolidone from E (1: 72.412109375), Ubiquitination of K (6: 72.412109375, 7: 72.412109375, 29: 72.412109375)	1	6.9897	85.9078
572	Q08AG5	Single Protein	DLVAFEDVAVNFTQEEWSLLDPSQK	0	NH2-DLVAFEDVAVNFTQEEWSLLDPSQK<ub>-COOH	2	M	NL	Ubiquitination of K (25)		Ubiquitination of K (25: 100.0)	Ubiquitination of K (25: 76.15797172111165)	1	6.9897	85.9078
576	Q96J94	Single Protein	QPVLVSQPK	0	pyro-QPVLVSQPK<ub>-COOH	359	LK	RR	Pyrolidone from Q (1), Ubiquitination of K (9)		Pyrolidone from Q (0: 100.0), Ubiquitination of K (9: 100.0)	Pyrolidone from Q (1: 74.70703125), Ubiquitination of K (9: 74.70703125)	1	8.48958	90.2351
588	P23443	Single Protein	KVTGANTGK	1	NH2-K<ub>VTGANTGK<ub>-COOH	110	VR	IF	Ubiquitination of K (1, 9)		Ubiquitination of K (1: 100.0, 9: 100.0)	Ubiquitination of K (1: 67.25838264299803, 9: 67.25838264299803)	1	4.44452	78.9762
597	P0DPF3	Related Proteins	VVSAGPLSSEK	0	ace-VVSAGPLSSEK<ub>-COOH	273; 273, 544; 238; 273, 544; 273; 273; 2	SM; SM, SM; SM; SM, SM; SM; SM; M	AE; AE, AE; AE; AE, AE; AE; AE; AE	Acetylation of protein N-term (1), Ubiquitination of K (11)		Acetylation of protein N-term (0: 100.0), Ubiquitination of K (11: 100.0)	Acetylation of protein N-term (1: 63.47009391992091), Ubiquitination of K (11: 63.47009391992091)	1	4.23602	76.0589
624	O60256	Single Protein	IMVYACKTSCAK	1	NH2-IM<ox>VYACK<ub>TSCAK<ub>-COOH	91	LL	SI	Oxidation of M (2), Ubiquitination of K (12, 7)		Oxidation of M (2: 100.0), Ubiquitination of K (7: 100.0, 12: 100.0)	Oxidation of M (2: 50.96993210475267), Ubiquitination of K (7: 50.96993210475267, 12: 50.96993210475267)	1	4.38558	79.1513
628	Q9Y265	Single Protein	REACGVIVELIKSK	2	NH2-REAC<cmm>GVIVELIK<ub>SK<ub>-COOH	46	NA	KM	Carbamidomethylation of C (4), Ubiquitination of K (12, 14)		Carbamidomethylation of C (4: 100.0), Ubiquitination of K (12: 100.0, 14: 100.0)	Carbamidomethylation of C (4: 65.1208682782437), Ubiquitination of K (12: 65.1208682782437, 14: 65.1208682782437)	1	3.9794	71.7668
650	Q8IWA4	Single Protein	LHTLIPCKK	1	NH2-LHTLIPCK<ub>K<ub>-COOH	492	DK	FD	Ubiquitination of K (8, 9)		Ubiquitination of K (8: 100.0, 9: 100.0)	Ubiquitination of K (8: 61.18226600985221, 9: 61.18226600985221)	1	4.77121	81.5412
690	P49419	Single Protein	IWADIPAPK	0	NH2-IWADIPAPK<ub>-COOH	101	WK	RG	Ubiquitination of K (9)		Ubiquitination of K (9: 100.0)	Ubiquitination of K (9: 46.58811978399607)	1	4.16281	74.2173
714	Q15021	Single Protein	MLPLIWSK	0	NH2-M<ox>LPLIWSK<ub>-COOH	678	RR	EP	Oxidation of M (1), Ubiquitination of K (8)		Oxidation of M (1: 100.0), Ubiquitination of K (8: 100.0)	Oxidation of M (1: 62.59842519685039), Ubiquitination of K (8: 62.59842519685039)	1	4.35729	78.6106
726	Q6IEZ7	Related Proteins	NKDVMGALKK	2	NH2-NK<ub>DVMGALK<ub>K<ub>-COOH	298; 326; 298	LR; LR; LR	ML; ML; ML	Ubiquitination of K (9, 2, 10)		Ubiquitination of K (2: 100.0, 9: 100.0, 10: 100.0)	Ubiquitination of K (2: 88.50408850408851, 9: 88.50408850408851, 10: 88.50408850408851)	2	16.3181	98.5348
746	Q15717	Single Protein	DKVAGHSLG	1	NH2-DK<ub>VAGHSLG-COOH	54	IR	YG	Ubiquitination of K (2)		Ubiquitination of K (2: 100.0)	Ubiquitination of K (2: 47.56995581737849)	1	4.25969	78.3486
770	Q32M45	Single Protein	EVFERNIRAEGLQMEK	2	pyro-EVFERNIRAEGLQM<ox>EK<ub>-COOH	136	KR	ES	Oxidation of M (14), Pyrolidone from E (1), Ubiquitination of K (16)		Oxidation of M (14: 100.0), Pyrolidone from E (0: 100.0), Ubiquitination of K (16: 100.0)	Oxidation of M (14: 71.42154451549433), Pyrolidone from E (1: 71.42154451549433), Ubiquitination of K (16: 71.42154451549433)	1	6.76694	85.3261
772	Q9BX63	Single Protein	IDDIDGNVK	0	NH2-IDDIDGNVK<ub>-COOH	1206	SK	TT	Ubiquitination of K (9)		Ubiquitination of K (9: 100.0)	Ubiquitination of K (9: 49.2405683488486)	1	4.25969	78.3486
795	Q9UPU5	Single Protein	TCIKSLPSVLVIHLMR	1	NH2-TCIK<ub>SLPSVLVIHLMR-COOH	1872	KR	FG	Ubiquitination of K (4)		Ubiquitination of K (4: 100.0)	Ubiquitination of K (4: 78.96534895070766)	1	6.24668	84.9462
804	P14210	Single Protein	NKGLPFTCK	1	NH2-NK<ub>GLPFTCK<ub>-COOH	77	TR	AF	Ubiquitination of K (9, 2)		Ubiquitination of K (2: 100.0, 9: 100.0)	Ubiquitination of K (2: 67.25838264299803, 9: 67.25838264299803)	1	4.44452	78.9762
824	Q9NQS7	Single Protein	RNTPLRMDPK	2	NH2-RNTPLRM<ox>DPK<longub>-COOH	522	IK	CS	Long ubiquitination (10), Oxidation of M (7)		Long ubiquitination (10: 100.0), Oxidation of M (7: 100.0)	Long ubiquitination (10: 72.412109375), Oxidation of M (7: 72.412109375)	1	7.3828	87.4307
848	Q96DT5	Single Protein	KKCILFDAK	2	NH2-K<ub>K<ub>C<cmm>ILFDAK<ub>-COOH	1249	IR	QA	Carbamidomethylation of C (3), Ubiquitination of K (1, 9, 2)		Carbamidomethylation of C (3: 100.0), Ubiquitination of K (1: 100.0, 2: 100.0, 9: 100.0)	Carbamidomethylation of C (3: 46.91478942213516), Ubiquitination of K (1: 46.91478942213516, 2: 46.91478942213516, 9: 46.91478942213516)	1	4.11245	73.227
869	Q2TAY7	Single Protein	LMALLGQALK	0	NH2-LM<ox>ALLGQALK<ub>-COOH	161	SR	WQ	Oxidation of M (2), Ubiquitination of K (10)		Oxidation of M (2: 100.0), Ubiquitination of K (10: 100.0)	Oxidation of M (2: 83.00395256916995), Ubiquitination of K (10: 83.00395256916995)	1	10.7188	95.2206
877	Q6B0I6	Single Protein	GRGRPPQK	1	NH2-GRGRPPQK<ub>-COOH	452	RR	LR	Ubiquitination of K (8)		Ubiquitination of K (8: 100.0)	Ubiquitination of K (8: 46.91478942213516)	1	4.11245	73.227
892	P31948	Single Protein	YPQAMKHYTEAIK	1	NH2-YPQAMK<ub>HYTEAIK<ub>-COOH	376	GD	RN	Ubiquitination of K (13, 6)		Ubiquitination of K (6: 100.0, 13: 100.0)	Ubiquitination of K (6: 46.91478942213516, 13: 46.91478942213516)	1	4.11245	73.227
920	P05997	Single Protein	GPIGPPGRAGK	1	NH2-GPIGPPGRAGK<ub>-COOH	1107	SR	RG	Ubiquitination of K (11)		Ubiquitination of K (11: 100.0)	Ubiquitination of K (11: 62.59842519685039)	1	4.35729	78.6106
928	Q9UNY4	Single Protein	SALQSYLKRHESR	2	NH2-SALQSYLK<ub>RHESR-COOH	864	SR	GN	Ubiquitination of K (8)		Ubiquitination of K (8: 100.0)	Ubiquitination of K (8: 80.22406234778373)	1	10.5308	94.6396
938	P22736	Single Protein	EHVAAVAGEPQPASCLSRLLGKLPELR	2	NH2-EHVAAVAGEPQPASC<cmm>LSRLLGK<ub>LPELR-COOH	537	LK	TL	Carbamidomethylation of C (15), Ubiquitination of K (22)		Carbamidomethylation of C (15: 100.0), Ubiquitination of K (22: 100.0)	Carbamidomethylation of C (15: 66.2075750122971), Ubiquitination of K (22: 66.2075750122971)	1	4.21005	76.3736
961	Q15154	Single Protein	WVSELSYVEEK	0	NH2-WVSELSYVEEK<ub>-COOH	986	LR	EQ	Ubiquitination of K (11)		Ubiquitination of K (11: 100.0)	Ubiquitination of K (11: 65.1208682782437)	1	3.9794	71.7668
965	Q15311	Single Protein	EPAKPSPSR	0	NH2-EPAK<ub>PSPSR-COOH	640	GK	DR	Ubiquitination of K (4)		Ubiquitination of K (4: 100.0)	Ubiquitination of K (4: 62.59842519685039)	1	4.35729	78.6106
1082	Q8NA66	Single Protein	VFLHQKPRLPKLFK	2	NH2-VFLHQK<ub>PRLPK<ub>LFK<ub>-COOH	73	PK	QE	Ubiquitination of K (6, 14, 11)		Ubiquitination of K (6: 100.0, 11: 100.0, 14: 100.0)	Ubiquitination of K (6: 76.15797172111165, 11: 76.15797172111165, 14: 76.15797172111165)	1	6.9897	85.9078
1088	Q8TC21	Single Protein	HQEIPFIQHIYQK	0	NH2-HQEIPFIQHIYQK<ub>-COOH	82	IK	GT	Ubiquitination of K (13)		Ubiquitination of K (13: 100.0)	Ubiquitination of K (13: 78.03326810176125)	1	6.21509	84.9462
1090	Q12923	Single Protein	LFPGQPAAESGK	0	NH2-LFPGQPAAESGK<ub>-COOH	1536	KK	ID	Ubiquitination of K (12)		Ubiquitination of K (12: 100.0)	Ubiquitination of K (12: 62.59842519685039)	1	4.35729	78.6106
1111	Q6R327	Single Protein	VQKDIFILK	1	NH2-VQK<ub>DIFILK<ub>-COOH	514	LR	DT	Ubiquitination of K (9, 3)		Ubiquitination of K (3: 100.0, 9: 100.0)	Ubiquitination of K (3: 49.73391388485729, 9: 49.73391388485729)	1	4.69633	81.3406
1150	P09238	Single Protein	SVPSGSEMPAK	0	NH2-SVPSGSEM<ox>PAK<ub>-COOH	278	TK	CD	Oxidation of M (8), Ubiquitination of K (11)		Oxidation of M (8: 100.0), Ubiquitination of K (11: 100.0)	Oxidation of M (8: 46.91478942213516), Ubiquitination of K (11: 46.91478942213516)	1	4.11245	73.227
1165	Q9P203	Single Protein	ELSLQASLARPEARTLQK	1	pyro-ELSLQASLARPEARTLQK<longub>-COOH	113	LK	DM	Long ubiquitination (18), Pyrolidone from E (1)		Long ubiquitination (18: 100.0), Pyrolidone from E (0: 100.0)	Long ubiquitination (18: 75.51420176297748), Pyrolidone from E (1: 75.51420176297748)	1	5.22088	82.7899
1192	Q96AQ1	Related Proteins	WVCINGVWVEPGGPSPARLKEGSSR	2	NH2-WVC<cmm>INGVWVEPGGPSPARLK<ub>EGSSR-COOH	117; 117	AR; AR	TH; TH	Carbamidomethylation of C (3), Ubiquitination of K (20)		Carbamidomethylation of C (3: 100.0), Ubiquitination of K (20: 100.0)	Carbamidomethylation of C (3: 76.66015625), Ubiquitination of K (20: 76.66015625)	1	5.74622	83.6096
1204	Q9NXL9	Single Protein	FDLILVLLDTK	0	NH2-FDLILVLLDTK<ub>-COOH	483	SR	NE	Ubiquitination of K (11)		Ubiquitination of K (11: 100.0)	Ubiquitination of K (11: 80.0785083415113)	1	10.3743	94.3942
1228	Q3BBV2	Related Proteins	LCPQLAEK	0	NH2-LC<cmm>PQLAEK<longub>-COOH	260; 295	EK; EK	KQ; KQ	Carbamidomethylation of C (2), Long ubiquitination (8)		Carbamidomethylation of C (2: 100.0), Long ubiquitination (8: 100.0)	Carbamidomethylation of C (2: 63.47009391992091), Long ubiquitination (8: 63.47009391992091)	1	4.23602	76.0589
1284	Q96NL0	Single Protein	KVSQNCICSIENMENVSSSRAK	2	NH2-K<ub>VSQNC<cmm>IC<cmm>SIENMENVSSSRAK<ub>-COOH	120	CR	GR	Carbamidomethylation of C (8, 6), Ubiquitination of K (1, 22)		Carbamidomethylation of C (6: 100.0, 8: 100.0), Ubiquitination of K (1: 100.0, 22: 100.0)	Carbamidomethylation of C (6: 71.42154451549433, 8: 71.42154451549433), Ubiquitination of K (1: 71.42154451549433, 22: 71.42154451549433)	1	4.81059	82.3315
1298	Q8IVD9	Single Protein	EPPILPRIQEQFQK	1	NH2-EPPILPRIQEQFQK<ub>-COOH	164	PR	NP	Ubiquitination of K (14)		Ubiquitination of K (14: 100.0)	Ubiquitination of K (14: 76.48794884407279)	1	5.7067	83.5642
1360	A0A1B0GV03	Single Protein	QQNRAQLKEENK	2	pyro-QQNRAQLK<ub>EENK<ub>-COOH	62	DK	AS	Pyrolidone from Q (1), Ubiquitination of K (12, 8)		Pyrolidone from Q (0: 100.0), Ubiquitination of K (8: 100.0, 12: 100.0)	Pyrolidone from Q (1: 73.14453125), Ubiquitination of K (8: 73.14453125, 12: 73.14453125)	1	5.08765	82.5688
1373	P25705	Single Protein	LKEIVTNFL	1	NH2-LK<longub>EIVTNFL-COOH	540	AK	AG	Long ubiquitination (2)		Long ubiquitination (2: 100.0)	Long ubiquitination (2: 66.2075750122971)	1	4.45713	79.304
1493	P46019	Single Protein	LMRGLLQCMMRQVAK	2	NH2-LM<ox>RGLLQCMM<ox>RQVAK<ub>-COOH	84	VK	VE	Oxidation of M (2, 10), Ubiquitination of K (15)		Oxidation of M (2: 99.9999983073707, 9: 50.00000084631465, 10: 50.00000084631465), Ubiquitination of K (15: 100.0)	Oxidation of M (2: 61.18226600985221, 10: 61.18226600985221), Ubiquitination of K (15: 61.18226600985221)	1	4.77121	81.5412
1514	Q460N3	Single Protein	CKIIIHVPGGK	1	NH2-C<cmm>K<ub>IIIHVPGGK<ub>-COOH	372	LK	DV	Carbamidomethylation of C (1), Ubiquitination of K (2, 11)		Carbamidomethylation of C (1: 100.0), Ubiquitination of K (2: 100.0, 11: 100.0)	Carbamidomethylation of C (1: 76.48794884407279), Ubiquitination of K (2: 76.48794884407279, 11: 76.48794884407279)	1	5.7067	83.5642
1522	P26232	Single Protein	EMVKLNYVA	1	NH2-EMVK<ub>LNYVA-COOH	182	GK	AR	Ubiquitination of K (4)		Ubiquitination of K (4: 100.0)	Ubiquitination of K (4: 63.47009391992091)	1	4.23602	76.0589
1587	Q9UIG0	Single Protein	GKHSVIPPAAR	1	NH2-GK<ub>HSVIPPAAR-COOH	1290	IR	SG	Ubiquitination of K (2)		Ubiquitination of K (2: 100.0)	Ubiquitination of K (2: 69.24212598425197)	1	5.5055	83.181
1596	Q9NQC3	Single Protein	LGDPTSENKTDEK	1	NH2-LGDPTSENK<ub>TDEK<ub>-COOH	483	PL	KI	Ubiquitination of K (9, 13)		Ubiquitination of K (9: 100.0, 13: 100.0)	Ubiquitination of K (9: 63.47009391992091, 13: 63.47009391992091)	1	4.23602	76.0589
1602	Q9H0X9	Single Protein	MKEEAFLR	1	NH2-MK<ub>EEAFLR-COOH	1		RR	Ubiquitination of K (2)		Ubiquitination of K (2: 100.0)	Ubiquitination of K (2: 46.91478942213516)	1	4.11245	73.227
1686	Q8NBZ7	Single Protein	YPPVKFLSEK	1	NH2-YPPVK<ub>FLSEK<ub>-COOH	77	QK	DR	Ubiquitination of K (5, 10)		Ubiquitination of K (5: 100.0, 10: 100.0)	Ubiquitination of K (5: 73.14453125, 10: 73.14453125)	1	9.23483	91.8033
1688	P35637	Single Protein	PKPDGPGGGPGGSHMGGNYGDDR	0	NH2-PK<ub>PDGPGGGPGGSHMGGNYGDDR-COOH	450	KA	RG	Ubiquitination of K (2)		Ubiquitination of K (2: 100.0)	Ubiquitination of K (2: 99.9084249084249)	1	25.0379	99.8175
1702	Q8IXQ6	Single Protein	NLKNLAEK	1	NH2-NLK<ub>NLAEK<ub>-COOH	741	TK	AK	Ubiquitination of K (8, 3)		Ubiquitination of K (3: 100.0, 8: 100.0)	Ubiquitination of K (3: 67.92176039119803, 8: 67.92176039119803)	1	4.1961	75.1825
1713	O95336	Single Protein	PLPAALVQPHTGK	0	NH2-PLPAALVQPHTGK<ub>-COOH	223	EN	LC	Ubiquitination of K (13)		Ubiquitination of K (13: 100.0)	Ubiquitination of K (13: 80.9407153356198)	1	11.5761	95.9781
1725	P15621	Single Protein	ETIRNLNCIGMK	1	pyro-ETIRNLNC<cmm>IGMK<ub>-COOH	83	MR	WE	Carbamidomethylation of C (8), Pyrolidone from E (1), Ubiquitination of K (12)		Carbamidomethylation of C (8: 100.0), Pyrolidone from E (0: 100.0), Ubiquitination of K (12: 100.0)	Carbamidomethylation of C (8: 47.56995581737849), Pyrolidone from E (1: 47.56995581737849), Ubiquitination of K (12: 47.56995581737849)	1	4.25969	78.3486
1737	Q5VTR2	Single Protein	RAAGEPGTSMPPEK	1	NH2-RAAGEPGTSMPPEK<ub>-COOH	8	NK	KA	Ubiquitination of K (14)		Ubiquitination of K (14: 100.0)	Ubiquitination of K (14: 72.412109375)	1	7.3828	87.4307
1753	O60610	Single Protein	LPFGLTPK	0	NH2-LPFGLTPK<ub>-COOH	763	PV	KL	Ubiquitination of K (8)		Ubiquitination of K (8: 100.0)	Ubiquitination of K (8: 50.96993210475267)	1	4.38558	79.1513
1756	Q9P2T0	Single Protein	ELAAPKIR	1	NH2-ELAAPK<ub>IR-COOH	234	LK	DN	Ubiquitination of K (6)		Ubiquitination of K (6: 100.0)	Ubiquitination of K (6: 66.2075750122971)	1	4.45713	79.304
1759	Q9Y520	Single Protein	PNVACWRDGGK	1	NH2-PNVAC<cmm>WRDGGK<ub>-COOH	173	RP	AA	Carbamidomethylation of C (5), Ubiquitination of K (11)		Carbamidomethylation of C (5: 100.0), Ubiquitination of K (11: 100.0)	Carbamidomethylation of C (5: 47.56995581737849), Ubiquitination of K (11: 47.56995581737849)	1	4.25969	78.3486
1821	Q8NE09	Single Protein	WISSSCKIIAFR	1	NH2-WISSSCK<ub>IIAFR-COOH	1012	SK	KA	Ubiquitination of K (7)		Ubiquitination of K (7: 100.0)	Ubiquitination of K (7: 78.03326810176125)	1	8.12913	88.8693
1890	P20929	Single Protein	KVQELKTHLSELVYR	2	NH2-K<ub>VQELK<ub>THLSELVYR-COOH	5148	YR	AA	Ubiquitination of K (1, 6)		Ubiquitination of K (1: 100.0, 6: 100.0)	Ubiquitination of K (1: 73.14453125, 6: 73.14453125)	1	5.08765	82.5688
1909	P13671	Single Protein	HRQIVVDKYYQENFCEQICSK	2	NH2-HRQIVVDK<ub>YYQENFCEQIC<cmm>SK<ub>-COOH	47	SR	QE	Carbamidomethylation of C (19), Ubiquitination of K (8, 21)		Carbamidomethylation of C (15: 0.03639328714564172, 19: 99.96360671285436), Ubiquitination of K (8: 100.0, 21: 100.0)	Carbamidomethylation of C (19: 73.14453125), Ubiquitination of K (8: 73.14453125, 21: 73.14453125)	1	5.08765	82.5688
2009	Q14123	Single Protein	SVLENHHLSAAYRLLQDDEEMNILINLSK	1	NH2-SVLENHHLSAAYRLLQDDEEMNILINLSK<ub>-COOH	295	DR	DD	Ubiquitination of K (29)		Ubiquitination of K (29: 100.0)	Ubiquitination of K (29: 78.03326810176125)	1	7.40363	87.8676
2019	P58304	Single Protein	KPEGERQALPKLDK	2	NH2-K<ub>PEGERQALPK<ub>LDK<ub>-COOH	269	GR	ME	Ubiquitination of K (1, 14, 11)		Ubiquitination of K (1: 100.0, 11: 100.0, 14: 100.0)	Ubiquitination of K (1: 49.2405683488486, 11: 49.2405683488486, 14: 49.2405683488486)	1	4.25969	78.3486
2067	O95696	Single Protein	GKPALVRR	1	NH2-GK<ub>PALVRR-COOH	876	GR	HT	Ubiquitination of K (2)		Ubiquitination of K (2: 100.0)	Ubiquitination of K (2: 66.2075750122971)	1	4.45713	79.304
2105	Q8IWT3	Single Protein	DYAVVLCCLGAKEILSK	1	NH2-DYAVVLC<cmm>C<cmm>LGAK<ub>EILSK<ub>-COOH	1070	HK	VL	Carbamidomethylation of C (8, 7), Ubiquitination of K (17, 12)		Carbamidomethylation of C (7: 100.0, 8: 100.0), Ubiquitination of K (12: 100.0, 17: 100.0)	Carbamidomethylation of C (7: 80.22406234778373, 8: 80.22406234778373), Ubiquitination of K (12: 80.22406234778373, 17: 80.22406234778373)	1	6.54792	85.0417
2145	Q14993	Single Protein	GEPGVIGSQGVKGEPGD	1	NH2-GEPGVIGSQGVK<ub>GEPGD-COOH	495	DR	PG	Ubiquitination of K (12)		Ubiquitination of K (12: 100.0)	Ubiquitination of K (12: 46.58811978399607)	1	4.16281	74.2173
2181	Q6Q759	Single Protein	EGHTYATVVKLK	1	NH2-EGHTYATVVK<ub>LK<ub>-COOH	2090	LK	NV	Ubiquitination of K (12, 10)		Ubiquitination of K (10: 100.0, 12: 100.0)	Ubiquitination of K (10: 68.61493123772102, 12: 68.61493123772102)	1	5.38391	82.9982
2198	P55786	Single Protein	LGWDPKPGEGHL	0	NH2-LGWDPK<ub>PGEGHL-COOH	690	ER	DA	Ubiquitination of K (6)		Ubiquitination of K (6: 100.0)	Ubiquitination of K (6: 49.2405683488486)	1	4.25969	78.3486
2252	Q96FK6	Single Protein	TVQAGKENLVAVLCSNGSIR	1	NH2-TVQAGK<ub>ENLVAVLC<cmm>SNGSIR-COOH	34	SK	IY	Carbamidomethylation of C (14), Ubiquitination of K (6)		Carbamidomethylation of C (14: 100.0), Ubiquitination of K (6: 100.0)	Carbamidomethylation of C (14: 74.54545454545455), Ubiquitination of K (6: 74.54545454545455)	1	5.14263	82.6958
2261	Q6ZRK6	Single Protein	QQIQANTEMEAELK	0	pyro-QQIQANTEMEAELK<ub>-COOH	293	LR	VL	Pyrolidone from Q (1), Ubiquitination of K (14)		Pyrolidone from Q (0: 100.0), Ubiquitination of K (14: 100.0)	Pyrolidone from Q (1: 78.03326810176125), Ubiquitination of K (14: 78.03326810176125)	1	8.12913	88.8693
2265	Q12967	Single Protein	HGASSTLPRMKQK	2	NH2-HGASSTLPRM<ox>K<ub>QK<ub>-COOH	893	VK	GL	Oxidation of M (10), Ubiquitination of K (13, 11)		Oxidation of M (10: 100.0), Ubiquitination of K (11: 100.0, 13: 100.0)	Oxidation of M (10: 76.48794884407279), Ubiquitination of K (11: 76.48794884407279, 13: 76.48794884407279)	1	7.34084	87.0438
2297	Q01813	Single Protein	MKTTIQRGL	2	NH2-M<ox>K<ub>TTIQRGL-COOH	626	EK	VL	Oxidation of M (1), Ubiquitination of K (2)		Oxidation of M (1: 100.0), Ubiquitination of K (2: 100.0)	Oxidation of M (1: 73.14453125), Ubiquitination of K (2: 73.14453125)	1	9.23483	91.8033
2365	Q9BW04	Single Protein	AKETVSTRYTQPQPPPAGLPQNAR	2	NH2-AK<longub>ETVSTRYTQPQPPPAGLPQNAR-COOH	251	QK	AE	Long ubiquitination (2)		Long ubiquitination (2: 100.0)	Long ubiquitination (2: 66.2075750122971)	2	5.76017	83.7286
2401	Q8NET8	Single Protein	YILSREIK	1	NH2-YILSREIK<ub>-COOH	359	LK	EK	Ubiquitination of K (8)		Ubiquitination of K (8: 100.0)	Ubiquitination of K (8: 47.56995581737849)	1	4.25969	78.3486
2406	Q32M45	Single Protein	EVFERNIRAEGLQMEK	2	NH2-EVFERNIRAEGLQM<ox>EK<ub>-COOH	136	KR	ES	Oxidation of M (14), Ubiquitination of K (16)		Oxidation of M (14: 100.0), Ubiquitination of K (16: 100.0)	Oxidation of M (14: 61.18226600985221), Ubiquitination of K (16: 61.18226600985221)	1	4.77121	81.5412
2451	Q9P0U3	Single Protein	CLSSSKNTLK	1	NH2-C<cmm>LSSSK<ub>NTLK<ub>-COOH	222	SR	DS	Carbamidomethylation of C (1), Ubiquitination of K (6, 10)		Carbamidomethylation of C (1: 100.0), Ubiquitination of K (6: 100.0, 10: 100.0)	Carbamidomethylation of C (1: 47.56995581737849), Ubiquitination of K (6: 47.56995581737849, 10: 47.56995581737849)	1	4.25969	78.3486
2457	Q9GZR2	Single Protein	GKAKVPASK	2	ace-GK<ub>AK<ub>VPASK<ub>-COOH	2	M	RA	Acetylation of protein N-term (1), Ubiquitination of K (4, 9, 2)		Acetylation of protein N-term (0: 100.0), Ubiquitination of K (2: 100.0, 4: 100.0, 9: 100.0)	Acetylation of protein N-term (1: 68.61493123772102), Ubiquitination of K (2: 68.61493123772102, 4: 68.61493123772102, 9: 68.61493123772102)	1	5.38391	82.9982
2464	A6NGB0	Related Proteins	STEQQLAAQLVTLQNELELAETK	0	NH2-STEQQLAAQLVTLQNELELAETK<ub>-COOH	170; 169	QK; QK	CA; CA	Ubiquitination of K (23)		Ubiquitination of K (23: 100.0)	Ubiquitination of K (23: 70.18664047151277)	3	12.6938	97.235
2469	Q15738	Single Protein	EAGVQKLILTSS	1	pyro-EAGVQK<ub>LILTSS-COOH	134	CK	AS	Pyrolidone from E (1), Ubiquitination of K (6)		Pyrolidone from E (0: 100.0), Ubiquitination of K (6: 100.0)	Pyrolidone from E (1: 50.96993210475267), Ubiquitination of K (6: 50.96993210475267)	1	4.38558	79.1513
2492	P38646	Single Protein	ERLVGMPAKR	2	pyro-ERLVGMPAK<longub>R-COOH	98	DG	QA	Long ubiquitination (9), Pyrolidone from E (1)		Long ubiquitination (9: 100.0), Pyrolidone from E (0: 100.0)	Long ubiquitination (9: 49.2405683488486), Pyrolidone from E (1: 49.2405683488486)	1	4.25969	78.3486
2511	Q8TF42	Single Protein	VNSQPGPQK	0	NH2-VNSQPGPQK<longub>-COOH	375	LR	RC	Long ubiquitination (9)		Long ubiquitination (9: 100.0)	Long ubiquitination (9: 77.42092457420925)	1	8.26456	89.781
2517	Q5VVJ2	Single Protein	PWGNWCDAKDLEGQTFEHLSAEELAK	1	NH2-PWGNWC<cmm>DAK<ub>DLEGQTFEHLSAEELAK<ub>-COOH	508	RD	RR	Carbamidomethylation of C (6), Ubiquitination of K (9, 26)		Carbamidomethylation of C (6: 100.0), Ubiquitination of K (9: 100.0, 26: 100.0)	Carbamidomethylation of C (6: 65.1208682782437), Ubiquitination of K (9: 65.1208682782437, 26: 65.1208682782437)	1	4.15603	73.5027
2533	O95785	Single Protein	MFPGLAAPSLPK	0	NH2-MFPGLAAPSLPK<ub>-COOH	1163	RK	KL	Ubiquitination of K (12)		Ubiquitination of K (12: 100.0)	Ubiquitination of K (12: 49.73391388485729)	1	4.69633	81.3406
2540	O94808	Single Protein	GYEFESETDTETIAK	0	NH2-GYEFESETDTETIAK<ub>-COOH	137	SK	LI	Ubiquitination of K (15)		Ubiquitination of K (15: 100.0)	Ubiquitination of K (15: 65.1208682782437)	1	3.9794	71.7668
2661	P0CJ78	Single Protein	AAHAPPAAAAEAPK	0	NH2-AAHAPPAAAAEAPK<ub>-COOH	461	HK	DG	Ubiquitination of K (14)		Ubiquitination of K (14: 100.0)	Ubiquitination of K (14: 67.92176039119803)	1	4.1961	75.1825
2683	P23582	Single Protein	GLSKGCFGLK	1	NH2-GLSK<ub>GCFGLK<ub>-COOH	105	KK	LD	Ubiquitination of K (4, 10)		Ubiquitination of K (4: 100.0, 10: 100.0)	Ubiquitination of K (4: 67.92176039119803, 10: 67.92176039119803)	1	4.1961	75.1825
2686	Q15149	Single Protein	VLAEKLAAIGEATR	1	NH2-VLAEK<longub>LAAIGEATR-COOH	1971	ER	LK	Long ubiquitination (5)		Long ubiquitination (5: 100.0)	Long ubiquitination (5: 61.18226600985221)	2	5.24043	82.7838
2745	Q8N163	Single Protein	QRAGGEPWGAK	1	NH2-QRAGGEPWGAK<ub>-COOH	205	RK	KP	Ubiquitination of K (11)		Ubiquitination of K (11: 100.0)	Ubiquitination of K (11: 67.92176039119803)	1	4.1961	75.1825
2759	O43423	Related Proteins	IKDLSTIE	1	NH2-IK<longub>DLSTIE-COOH	96; 100; 100; 100	NK; NK; NK; NK	PL; PL; PL; PL	Long ubiquitination (2)		Long ubiquitination (2: 100.0)	Long ubiquitination (2: 73.14453125)	1	9.23483	91.8033
2828	O94906	Single Protein	KVLNKARENIPTDR	3	NH2-K<ub>VLNK<ub>ARENIPTDR-COOH	451	AR	HI	Ubiquitination of K (1, 5)		Ubiquitination of K (1: 100.0, 5: 100.0)	Ubiquitination of K (1: 71.42154451549433, 5: 71.42154451549433)	1	6.76694	85.3261
2857	P15311	Single Protein	RKEDEVEEWQHR	2	NH2-RK<longub>EDEVEEWQHR-COOH	437	RR	AK	Long ubiquitination (2)		Long ubiquitination (2: 100.0)	Long ubiquitination (2: 61.18226600985221)	1	4.77121	81.5412
2957	Q9BV73	Single Protein	GQVQDLKK	1	NH2-GQVQDLK<ub>K<ub>-COOH	1543	QR	QL	Ubiquitination of K (8, 7)		Ubiquitination of K (7: 100.0, 8: 100.0)	Ubiquitination of K (7: 49.73391388485729, 8: 49.73391388485729)	1	4.69633	81.3406
2969	P33993	Single Protein	KQPMVPESLADYITAAYVEMR	1	NH2-K<ub>QPM<ox>VPESLADYITAAYVEMR-COOH	569	RE	RE	Oxidation of M (4), Ubiquitination of K (1)		Oxidation of M (4: 100.0, 20: 1.9565923170033355E-22), Ubiquitination of K (1: 100.0)	Oxidation of M (4: 98.91838741396263), Ubiquitination of K (1: 98.91838741396263)	1	15.9502	98.5267
2980	Q6NSJ0	Single Protein	DVYLPAGK	0	NH2-DVYLPAGK<ub>-COOH	674	ER	WR	Ubiquitination of K (8)		Ubiquitination of K (8: 100.0)	Ubiquitination of K (8: 49.2405683488486)	1	4.25969	78.3486
2983	P61254	Related Proteins	MKFNPFVTSDRSK	2	NH2-MK<ub>FNPFVTSDRSK<ub>-COOH	1; 1		NR; NR	Ubiquitination of K (13, 2)		Ubiquitination of K (2: 100.0, 13: 100.0)	Ubiquitination of K (2: 70.18664047151277, 13: 70.18664047151277)	2	11.5569	95.9779
3003	O75369	Single Protein	FDLVIPFAVRK	1	NH2-FDLVIPFAVRK<ub>-COOH	1747	KP	GE	Ubiquitination of K (11)		Ubiquitination of K (11: 100.0)	Ubiquitination of K (11: 68.61493123772102)	1	5.38391	82.9982
3044	Q969N2	Single Protein	QTLSVVFDAFITGQGK	0	pyro-QTLSVVFDAFITGQGK<ub>-COOH	240	LR	KD	Pyrolidone from Q (1), Ubiquitination of K (16)		Pyrolidone from Q (0: 100.0), Ubiquitination of K (16: 100.0)	Pyrolidone from Q (1: 46.58811978399607), Ubiquitination of K (16: 46.58811978399607)	1	4.16281	74.2173
3066	Q99435	Single Protein	LDQCYCERTCTMK	1	NH2-LDQCYCERTC<cmm>TMK<ub>-COOH	265	NR	GT	Carbamidomethylation of C (10), Ubiquitination of K (13)		Carbamidomethylation of C (4: 33.33333333333333, 6: 33.33333333333333, 10: 33.33333333333333), Ubiquitination of K (13: 100.0)	Carbamidomethylation of C (10: 65.1208682782437), Ubiquitination of K (13: 65.1208682782437)	1	3.9794	71.7668
3074	Q05639	Single Protein	SGDAAIVEMVPGKPMCVE	0	NH2-SGDAAIVEMVPGK<ub>PMC<cmm>VE-COOH	396	LK	SF	Carbamidomethylation of C (16), Ubiquitination of K (13)		Carbamidomethylation of C (16: 100.0), Ubiquitination of K (13: 100.0)	Carbamidomethylation of C (16: 72.412109375), Ubiquitination of K (13: 72.412109375)	1	7.3828	87.4307
3096	Q9H0S4	Single Protein	LKVIPRDR	2	NH2-LK<ub>VIPRDR-COOH	192	KI	KT	Ubiquitination of K (2)		Ubiquitination of K (2: 100.0)	Ubiquitination of K (2: 46.58811978399607)	1	4.16281	74.2173
3099	Q8TAX7	Single Protein	ISRFLLYMK	1	NH2-ISRFLLYMK<ub>-COOH	356	NK	NL	Ubiquitination of K (9)		Ubiquitination of K (9: 100.0)	Ubiquitination of K (9: 62.59842519685039)	1	4.35729	78.6106
3100	Q9HCN3	Single Protein	LRLNTGMDSGGSLTISLRANK	2	NH2-LRLNTGM<ox>DSGGSLTISLRANK<ub>-COOH	388	MR	TE	Oxidation of M (7), Ubiquitination of K (21)		Oxidation of M (7: 100.0), Ubiquitination of K (21: 100.0)	Oxidation of M (7: 72.412109375), Ubiquitination of K (21: 72.412109375)	1	6.9897	85.9078
3190	Q9HBI1	Single Protein	LNVAEVTQSEIGQK	0	NH2-LNVAEVTQSEIGQK<ub>-COOH	133	CK	QK	Ubiquitination of K (14)		Ubiquitination of K (14: 100.0)	Ubiquitination of K (14: 67.25838264299803)	1	4.44452	78.9762
3218	Q8N4S9	Single Protein	QRIQEYDK	1	pyro-QRIQEYDK<longub>-COOH	541	IK	VM	Long ubiquitination (8), Pyrolidone from Q (1)		Long ubiquitination (8: 100.0), Pyrolidone from Q (0: 100.0)	Long ubiquitination (8: 49.2405683488486), Pyrolidone from Q (1: 49.2405683488486)	1	4.25969	78.3486

## Sheet: GO-Slim MF
	CONTROL	DB1h					D4h					DB4h
	301	212	expected	Fold Enrichment	+/-	raw P value	300	expected	Fold Enrichment	+/-	raw P value	467	expected	Fold Enrichment	+/-	raw P value
ligand-gated ion channel activity	1	2	0.7	2.84	+	0.157	4	1	4.01	+	0.0186	2	1.55	1.29	+	0.46	A
metal ion binding	4	3	2.82	1.06	+	0.536	8	3.99	2.01	+	0.0492	4	6.21	0.64	-	0.257	AKT,B
microtubule motor activity	1	5	0.7	7.1	+	0.00078	6	1	6.02	+	0.000564	4	1.55	2.58	+	0.072	A
structural molecule activity	2	7	1.41	4.97	+	0.000605	2	1.99	1	+	0.593	10	3.1	3.22	+	0.00135	AKT,A
phosphatidylinositol binding	1	3	0.7	4.26	+	0.0344	1	1	1	+	0.632	2	1.55	1.29	+	0.46	A
molecular adaptor activity	1	3	0.7	4.26	+	0.0344	3	1	3.01	+	0.0794	4	1.55	2.58	+	0.072	AKT
catalytic activity, acting on a tRNA	1	3	0.7	4.26	+	0.0344	4	1	4.01	+	0.0186	2	1.55	1.29	+	0.46	A
actin binding	1	1	0.7	1.42	+	0.506	4	1	4.01	+	0.0186	9	1.55	5.8	+	3.4e-05	A
transferase activity, transferring one-carbon groups	1	1	0.7	1.42	+	0.506	1	1	1	+	0.632	5	1.55	3.22	+	0.0209	A
receptor ligand activity	1	1	0.7	1.42	+	0.506	2	1	2.01	+	0.263	5	1.55	3.22	+	0.0209	A
chromatin binding	1	0	0.7	< 0.01	-	0.494	1	1	1	+	0.632	5	1.55	3.22	+	0.0209	A,B
DNA-dependent ATPase activity	1	0	0.7	< 0.01	-	0.494	0	1	< 0.01	-	0.368	5	1.55	3.22	+	0.0209	B
protein-containing complex binding	2	1	1.41	0.71	-	0.588	4	1.99	2.01	+	0.141	7	3.1	2.26	+	0.0384	A,B
Rho GTPase binding	2	1	1.41	0.71	-	0.588	3	1.99	1.51	+	0.322	7	3.1	2.26	+	0.0384	AKT,A,B

## Sheet: GO-Slim BP
	CONTROL	DB1h					D4h					DB4h
	301	212	expected	Fold Enrichment	+/-	raw P value	300	expected	Fold Enrichment	+/-	raw P value	467	expected	Fold Enrichment	+/-	raw P value
amide biosynthetic process	1	4	0.7	5.68	+	0.00577	9	1	9.03	+	9.95e-07	6	1.55	3.87	+	0.00514	AKT
posttranscriptional regulation of gene expression	1	1	0.7	1.42	+	0.506	7	1	7.02	+	7.74e-05	1	1.55	0.64	-	0.54	A
divalent metal ion transport	1	3	0.7	4.26	+	0.0344	5	1	5.02	+	0.00353	5	1.55	3.22	+	0.0209	B
mitochondrion organization	1	2	0.7	2.84	+	0.157	4	1	4.01	+	0.0186	3	1.55	1.93	+	0.204	B
cellular metal ion homeostasis	1	2	0.7	2.84	+	0.157	4	1	4.01	+	0.0186	5	1.55	3.22	+	0.0209	B
maintenance of location in cell	1	2	0.7	2.84	+	0.157	4	1	4.01	+	0.0186	2	1.55	1.29	+	0.46	B
cellular divalent inorganic cation homeostasis	1	2	0.7	2.84	+	0.157	4	1	4.01	+	0.0186	5	1.55	3.22	+	0.0209	B
negative regulation of signal transduction	1	2	0.7	2.84	+	0.157	4	1	4.01	+	0.0186	2	1.55	1.29	+	0.46	A
positive regulation of protein phosphorylation	1	0	0.7	< 0.01	-	0.494	4	1	4.01	+	0.0186	4	1.55	2.58	+	0.072	A
positive regulation of kinase activity	1	0	0.7	< 0.01	-	0.494	4	1	4.01	+	0.0186	2	1.55	1.29	+	0.46	AKT
regulation of intracellular signal transduction	4	3	2.82	1.06	+	0.536	8	3.99	2.01	+	0.0492	4	6.21	0.64	-	0.257	A,AKT
Golgi vesicle transport	4	2	2.82	0.71	-	0.464	8	3.99	2.01	+	0.0492	9	6.21	1.45	+	0.173	A
endosomal transport	1	5	0.7	7.1	+	0.00078	4	1	4.01	+	0.0186	3	1.55	1.93	+	0.204	A
regulation of cellular localization	1	4	0.7	5.68	+	0.00577	5	1	5.02	+	0.00353	6	1.55	3.87	+	0.00514	B,AKT
cell-substrate junction assembly	1	3	0.7	4.26	+	0.0344	1	1	1	+	0.632	2	1.55	1.29	+	0.46	A
negative regulation of cellular component organization	1	3	0.7	4.26	+	0.0344	3	1	3.01	+	0.0794	3	1.55	1.93	+	0.204	A
regulation of mitotic cell cycle	2	5	1.41	3.55	+	0.0143	2	1.99	1	+	0.593	4	3.1	1.29	+	0.376	AKT,A
nucleocytoplasmic transport	3	6	2.11	2.84	+	0.0204	3	2.99	1	+	0.576	4	4.65	0.86	-	0.502	A,B,AKT
cellular component disassembly	1	2	0.7	2.84	+	0.157	1	1	1	+	0.632	9	1.55	5.8	+	3.4e-05	A
regulation of plasma membrane bounded cell projection organization	1	2	0.7	2.84	+	0.157	3	1	3.01	+	0.0794	5	1.55	3.22	+	0.0209	A
protein modification by small protein conjugation or removal	3	4	2.11	1.89	+	0.163	4	2.99	1.34	+	0.351	11	4.65	2.36	+	0.00811	A,AKT
supramolecular fiber organization	4	3	2.82	1.06	+	0.536	7	3.99	1.76	+	0.108	13	6.21	2.09	+	0.0109	A

## Sheet: GO-Slim CC
	CONTROL	DB1h					D4h					DB4h
	301	212	expected	Fold Enrichment	+/-	raw P value	300	expected	Fold Enrichment	+/-	raw P value	467	expected	Fold Enrichment	+/-	raw P value
mitochondrion	2	3	1.41	2.13	+	0.168	12	1.99	6.02	+	1.13e-06	4	3.1	1.29	+	0.376	A,B
cytoplasmic vesicle membrane	1	2	0.7	2.84	+	0.157	4	1	4.01	+	0.0186	3	1.55	1.93	+	0.204	B
cation channel complex	1	1	0.7	1.42	+	0.506	4	1	4.01	+	0.0186	4	1.55	2.58	+	0.072	A
receptor complex	2	1	1.41	0.71	-	0.588	6	1.99	3.01	+	0.016	7	3.1	2.26	+	0.0384	A,AKT
nucleolus	2	1	1.41	0.71	-	0.588	6	1.99	3.01	+	0.016	3	3.1	0.97	-	0.624	B
integral component of plasma membrane	6	2	4.23	0.47	-	0.204	13	5.98	2.17	+	0.00795	13	9.31	1.4	+	0.146	A,B,AKT
bounding membrane of organelle	4	5	2.82	1.77	+	0.154	9	3.99	2.26	+	0.0202	9	6.21	1.45	+	0.173	A,B
microtubule associated complex	1	5	0.7	7.1	+	0.00078	7	1	7.02	+	7.74e-05	6	1.55	3.87	+	0.00514	A
transcription regulator complex	1	3	0.7	4.26	+	0.0344	1	1	1	+	0.632	3	1.55	1.93	+	0.204	B
nuclear pore	1	3	0.7	4.26	+	0.0344	0	1	< 0.01	-	0.368	3	1.55	1.93	+	0.204	A
endoplasmic reticulum	3	8	2.11	3.79	+	0.00144	2	2.99	0.67	-	0.424	6	4.65	1.29	+	0.323	A,B
extracellular matrix	1	1	0.7	1.42	+	0.506	2	1	2.01	+	0.263	6	1.55	3.87	+	0.00514	A
focal adhesion	1	2	0.7	2.84	+	0.157	2	1	2.01	+	0.263	5	1.55	3.22	+	0.0209	AKT
intrinsic component of organelle membrane	1	1	0.7	1.42	+	0.506	1	1	1	+	0.632	5	1.55	3.22	+	0.0209	A

## Sheet: Panther Protein Class
	CONTROL	DB1h					D4h					DB4h
	301	212	expected	Fold Enrichment	+/-	raw P value	300	expected	Fold Enrichment	+/-	raw P value	467	expected	Fold Enrichment	+/-	raw P value
GTPase-activating protein	2	1	1.41	0.71	-	0.588	7	1.99	3.51	+	0.0043	7	3.1	2.26	+	0.0384	A,AKT
histone modifying enzyme	1	0	0.7	< 0.01	-	0.494	5	1	5.02	+	0.00353	5	1.55	3.22	+	0.0209	B
G-protein modulator	5	5	3.52	1.42	+	0.278	11	4.98	2.21	+	0.0127	16	7.76	2.06	+	0.00583	A,B,AKT
membrane traffic protein	4	3	2.82	1.06	+	0.536	8	3.99	2.01	+	0.0492	5	6.21	0.81	-	0.412	A,B
microtubule binding motor protein	1	5	0.7	7.1	+	0.00078	6	1	6.02	+	0.000564	4	1.55	2.58	+	0.072	A
protein phosphatase	1	3	0.7	4.26	+	0.0344	1	1	1	+	0.632	1	1.55	0.64	-	0.54	A
general transcription factor	2	1	1.41	0.71	-	0.588	1	1.99	0.5	-	0.407	8	3.1	2.58	+	0.014	A
translation initiation factor	1	0	0.7	< 0.01	-	0.494	1	1	1	+	0.632	7	1.55	4.51	+	0.00109	A,B
extracellular matrix protein	1	0	0.7	< 0.01	-	0.494	2	1	2.01	+	0.263	6	1.55	3.87	+	0.00514	A

## Sheet: Panther Pathways
	CONTROL	DB1h					D4h					DB4h
	301	212	expected	Fold Enrichment	+/-	raw P value	300	expected	Fold Enrichment	+/-	raw P value	467	expected	Fold Enrichment	+/-	raw P value
Endothelin signaling pathway	1	1	0.7	1.42	+	0.506	4	1	4.01	+	0.0186	1	1.55	0.64	-	0.54	A
EGF receptor signaling pathway	1	1	0.7	1.42	+	0.506	4	1	4.01	+	0.0186	1	1.55	0.64	-	0.54	A
Inflammation mediated by chemokine and cytokine signaling pathway	2	5	1.41	3.55	+	0.0143	4	1.99	2.01	+	0.141	8	3.1	2.58	+	0.014	A,B
Integrin signalling pathway	4	8	2.82	2.84	+	0.00796	7	3.99	1.76	+	0.108	11	6.21	1.77	+	0.0505	A,B,AKT
CCKR signaling map	2	1	1.41	0.71	-	0.588	4	1.99	2.01	+	0.141	11	3.1	3.54	+	0.000363	A,B
