# Supplementary material for: Disulfiram Oxy-Derivatives Suppress Protein Retrotranslocation across the ER Membrane to the Cytosol and Initiate Paraptosis-like Cell Death
Source: Membranes (Basel). 2022 Aug 29;12(9):845. doi: 10.3390/membranes12090845 (PMC9506514; doi:10.3390/membranes12090845)
Supplement: Supplementary file 1 [file membranes-12-00845-s001.zip › Table S2 UniProtKB groups of UB-proteins.xlsx]

## Sheet: S2(1)
Столбец1	Protein(s)	Protein Inference	Sequence	Missed Cleavages	Modified Sequence	Position	AAs Before	AAs After	Variable Modifications	Fixed Modifications	Probabilistic PTM score	D-score	#PSMs	Score	Confidence [%]
Table S2(1).		Oxidized Ub-proteins
Control
AKT_01	P68104	Related Proteins	IVDMVPGKPMCVESFSDYPPLGR	0	NH2-IVDM<ox>VPGK<ubq long k>PM<ox>C<cmm>VESFSDYPPLGR-COOH	401; 401	AA; AA	FA; FA	Carbamidomethylation of C (11), Oxidation of M (10, 4), Ubiquitination long of K (8)		Carbamidomethylation of C (11: 100.0), Oxidation of M (4: 100.0, 10: 100.0), Ubiquitination long of K (8: 100.0)	Carbamidomethylation of C (11: 100.0), Oxidation of M (4: 100.0, 10: 100.0), Ubiquitination long of K (8: 100.0)	1	100	100
AKT_01	Q16288	Related Proteins	WMPPESIMYRK	1	NH2-WM<ox>PPESIMYRK<ub>-COOH	736; 719	IR; IR	FT; FT	Oxidation of M (2), Ubiquitination of K (11)		Oxidation of M (2: 99.99999994093768, 8: 2.690205740522066E-6), Ubiquitination of K (11: 100.0)	Oxidation of M (2: 53.17616240995415), Ubiquitination of K (11: 53.17616240995415)	7	17.5477	75.4098
AKT_01	Q8NEN0	Single Protein	FISGNLGFLNEMISK	0	NH2-FISGNLGFLNEM<ox>ISK<ub>-COOH	403	IK	GA	Oxidation of M (12), Ubiquitination of K (15)		Oxidation of M (12: 100.0), Ubiquitination of K (15: 100.0)	Oxidation of M (12: 97.01986754966887), Ubiquitination of K (15: 97.01986754966887)	7	28.8199	91.8033
AKT_01	P04083	Single Protein	IMVSRSEIDMNDIK	1	NH2-IM<ox>VSRSEIDMNDIK<ub>-COOH	299	IR	AF	Oxidation of M (2), Ubiquitination of K (14)		Oxidation of M (2: 99.99999999972586, 10: 50.0), Ubiquitination of K (14: 100.0)	Oxidation of M (2: 68.05644644002567), Ubiquitination of K (14: 68.05644644002567)	7	22.2415	92.0635
AKT_01	P38646	Single Protein	QKAMQDAEVSKSDIGEVILVGGMTR	2	pyro-QK<ub>AM<ox>QDAEVSK<ub>SDIGEVILVGGMTR-COOH	367	PC	MP	Oxidation of M (4), Pyrolidone from Q (1), Ubiquitination of K (2, 11)		Oxidation of M (4: 99.99999999999987, 23: 1.288202472326215E-13), Pyrolidone from Q (0: 100.0), Ubiquitination of K (2: 100.0, 11: 100.0)	Oxidation of M (4: 100.0), Pyrolidone from Q (1: 100.0), Ubiquitination of K (2: 100.0, 11: 100.0)	1	100	100
AKT_01	Q9NZN1	Single Protein	LLYPMESK	0	NH2-LLYPM<ox>ESK<ub>-COOH	244	PK	LT	Oxidation of M (5), Ubiquitination of K (8)		Oxidation of M (5: 100.0), Ubiquitination of K (8: 100.0)	Oxidation of M (5: 75.83807716635042), Ubiquitination of K (8: 75.83807716635042)	3	18.8824	78.125
2155	A4D161	Single Protein	SPTGMDCKLVGPETLCFCTHRYK	2	NH2-SPTGM<ox>DCK<ub>LVGPETLC<cmm>FCTHRYK-COOH	60	WR	QH	Carbamidomethylation of C (16), Oxidation of M (5), Ubiquitination of K (8)		Carbamidomethylation of C (7: 33.33333333333333, 16: 49.98694659649914, 18: 49.98694659649914), Oxidation of M (5: 100.0), Ubiquitination of K (8: 99.99999997585384, 23: 0.12859737027305052)	Oxidation of M (5: 84.76190476190476), Ubiquitination of K (8: 84.76190476190476)	2	4.98055	73.8095
2709	O43427	Single Protein	VFKVVEEMR	1	NH2-VFK<ub>VVEEM<ox>R-COOH	144	KR	GS	Oxidation of M (8), Ubiquitination of K (3)		Oxidation of M (8: 100.0), Ubiquitination of K (3: 100.0)	Oxidation of M (8: 23.17460317460317), Ubiquitination of K (3: 23.17460317460317)	1	6.73827	87.4251
137	O75643	Single Protein	FLYEPLPVESHLDHCMHDHFNAEIVTK	0	NH2-FLYEPLPVESHLDHCM<ox>HDHFNAEIVTK<longub>-COOH	1717	KK	TI	Long ubiquitination (27), Oxidation of M (16)		Long ubiquitination (27: 100.0), Oxidation of M (16: 100.0)	Long ubiquitination (27: 59.36507936507937), Oxidation of M (16: 59.36507936507937)	1	2.48178	61.4035
1000	O95995	Single Protein	AKGTPIVDGLAPEDMSKEQVEEHVSR	2	NH2-AK<ub>GTPIVDGLAPEDM<ox>SK<longub>EQVEEHVSR-COOH	12	GK	IR	Long ubiquitination (17), Oxidation of M (15), Ubiquitination of K (2)		Long ubiquitination (2: 5.880592330102574E-11, 17: 100.0), Oxidation of M (15: 100.0), Ubiquitination of K (2: 100.0, 17: 4.511405953676495E-8)	Long ubiquitination (17: 91.42857142857143), Oxidation of M (15: 91.42857142857143), Ubiquitination of K (2: 91.42857142857143)	2	8.95995	91.6664
1788	P06396	Single Protein	VVQGKEPAHLMSLFGGKPMIIYKGGTSR	2	NH2-VVQGKEPAHLM<ox>SLFGGK<longub>PMIIYKGGTSR-COOH	526	SR	EG	Long ubiquitination (17), Oxidation of M (11)		Long ubiquitination (5: 0.12298612650924248, 17: 99.99999996262193, 23: 2.032087396197912E-4), Oxidation of M (11: 99.99999999998789, 19: 1.7543915318457033E-4)	Long ubiquitination (17: 96.5079365079365), Oxidation of M (11: 96.5079365079365)	2	17.5847	98.3657
1487	P06576	Single Protein	ILQDYKSLQDIIAILGMDELSEEDKLTVSR	2	NH2-ILQDYK<ub>SLQDIIAILGM<ox>DELSEEDKLTVSR-COOH	427	QK	AR	Oxidation of M (17), Ubiquitination of K (6)		Oxidation of M (17: 100.0), Ubiquitination of K (6: 100.0, 25: 2.3793674360337262E-39)	Oxidation of M (17: 100.0), Ubiquitination of K (6: 100.0)	1	100	100
888	P08912	Single Protein	TFKMLLLCRWK	2	NH2-TFKM<ox>LLLCRWK<ub>-COOH	505	RK	KK	Oxidation of M (4), Ubiquitination of K (11)		Oxidation of M (4: 100.0), Ubiquitination of K (3: 2.9558939440172483E-16, 11: 100.0)	Oxidation of M (4: 19.365079365079364), Ubiquitination of K (11: 19.365079365079364)	1	4.62974	72.9412
2606	P09467	Single Protein	LLYECNPMAYVMEKAGGMATTGK	1	NH2-LLYECNPMAYVM<ox>EK<ub>AGGM<ox>ATTGK<ub>-COOH	278	LR	EA	Oxidation of M (18, 12), Ubiquitination of K (14, 23)		Oxidation of M (8: 50.000000290602294, 12: 99.98765873992156, 18: 99.9999999996813), Ubiquitination of K (14: 100.0, 23: 100.0)	Oxidation of M (8: 48.47133757961783, 18: 80.0), Ubiquitination of K (14: 80.0, 23: 80.0)	2	5.49208	80.5822
2148	P09913	Single Protein	EFKATMCNLLAYLK	1	NH2-EFK<ub>ATM<ox>C<cmm>NLLAYLK-COOH	48	NR	HL	Carbamidomethylation of C (7), Oxidation of M (6), Ubiquitination of K (3)		Carbamidomethylation of C (7: 100.0), Oxidation of M (6: 100.0), Ubiquitination of K (3: 50.0, 14: 50.0)		1	2.8272	64.2458
526	P27338	Single Protein	IMDLLGDRVKLERPVIYIDQTR	2	NH2-IM<ox>DLLGDRVK<longub>LERPVIYIDQTR-COOH	221	ER	EN	Long ubiquitination (10), Oxidation of M (2)		Long ubiquitination (10: 100.0), Oxidation of M (2: 100.0)	Long ubiquitination (10: 60.31746031746032), Oxidation of M (2: 60.31746031746032)	1	2.57321	60.452
1545	P28288	Single Protein	FSMGFIDSIIAK	0	NH2-FSM<ox>GFIDSIIAK<ub>-COOH	311	FR	YL	Oxidation of M (3), Ubiquitination of K (12)		Oxidation of M (3: 100.0), Ubiquitination of K (12: 100.0)	Oxidation of M (3: 73.96825396825398), Ubiquitination of K (12: 73.96825396825398)	2	34.5773	100
2842	P29622	Single Protein	FLNDTMAVYEAK	0	NH2-FLNDTM<ox>AVYEAK<longub>-COOH	155	AK	LF	Long ubiquitination (12), Oxidation of M (6)		Long ubiquitination (12: 100.0), Oxidation of M (6: 100.0)	Long ubiquitination (12: 65.39682539682539), Oxidation of M (6: 65.39682539682539)	2	18.906	99.5918
2292	P35659	Single Protein	FRNAMLKSICEVLDLER	2	NH2-FRNAM<ox>LK<longub>SIC<cmm>EVLDLER-COOH	152	KK	SG	Carbamidomethylation of C (10), Long ubiquitination (7), Oxidation of M (5)		Carbamidomethylation of C (10: 100.0), Long ubiquitination (7: 100.0), Oxidation of M (5: 100.0)	Carbamidomethylation of C (10: 68.25396825396825), Long ubiquitination (7: 68.25396825396825), Oxidation of M (5: 68.25396825396825)	1	2.48178	61.4035
2377	P49917	Single Protein	ADIQICILDGEMMAYNPNTQTFMQK	0	NH2-ADIQICILDGEM<ox>MAYNPNTQTFMQK<ub>-COOH	321	FK	GT	Oxidation of M (12), Ubiquitination of K (25)		Oxidation of M (12: 49.99999716968603, 13: 49.99999716968603, 23: 5.660627936905294E-6), Ubiquitination of K (25: 100.0)	Ubiquitination of K (25: 98.41269841269842)	1	13.2736	98.8506
265	Q01118	Single Protein	LSDFAAALDPPLFMAKPNK	0	NH2-LSDFAAALDPPLFM<ox>AK<ub>PNK-COOH	1538	SK	GQ	Oxidation of M (14), Ubiquitination of K (16)		Oxidation of M (14: 100.0), Ubiquitination of K (16: 50.0, 19: 50.0)	Oxidation of M (14: 65.71428571428571)	1	2.48178	61.4035
2137	Q04637	Single Protein	CLMALKVPTTEKPTVTVNFR	1	NH2-CLM<ox>ALK<longub>VPTTEKPTVTVNFR-COOH	821	CR	KL	Long ubiquitination (6), Oxidation of M (3)		Long ubiquitination (6: 99.96346464093506, 12: 0.03653535906493855), Oxidation of M (3: 100.0)	Long ubiquitination (6: 9.841269841269842), Oxidation of M (3: 88.57142857142857)	1	4.98055	73.8095
1063	Q13438	Single Protein	MAGASPTKDDSKDSDFWK	2	NH2-M<ox>AGASPTK<longub>DDSK<longub>DSDFWK-COOH	296	QK	ML	Long ubiquitination (8, 12), Oxidation of M (1)		Long ubiquitination (8: 99.99999999999993, 12: 99.99999999995536, 18: 4.4703309082758757E-11), Oxidation of M (1: 100.0)	Long ubiquitination (8: 63.8095238095238, 12: 63.8095238095238), Oxidation of M (1: 63.8095238095238)	1	2.39223	57.7381
390	Q15459	Single Protein	EGKAQEPSAAIPKVMQQQQQTTQQQLPQK	2	NH2-EGK<longub>AQEPSAAIPK<ub>VM<ox>QQQQQTTQQQLPQK<ub>-COOH	103	FK	VQ	Long ubiquitination (3), Oxidation of M (15), Ubiquitination of K (29, 13)		Long ubiquitination (3: 99.9999472846704, 13: 5.2715329550567166E-5, 29: 4.757444699348311E-14), Oxidation of M (15: 100.0), Ubiquitination of K (3: 0.07524024252292251, 13: 99.92475975747715, 29: 99.9999999999999)	Long ubiquitination (13: 59.682539682539684), Oxidation of M (15: 59.682539682539684), Ubiquitination of K (3: 59.682539682539684, 29: 59.682539682539684)	1	2.48178	61.4035
2799	Q15911	Single Protein	KLADMIASR	1	NH2-K<ub>LADM<ox>IASR-COOH	1714	RK	QQ	Oxidation of M (5), Ubiquitination of K (1)		Oxidation of M (5: 100.0), Ubiquitination of K (1: 100.0)	Oxidation of M (5: 31.11111111111111), Ubiquitination of K (1: 31.11111111111111)	1	9.74857	92.1526
620	Q5QP82	Single Protein	MISSPHGYGIRLLGFDKQCSELVDCLPK	2	NH2-M<ox>ISSPHGYGIRLLGFDKQC<cmm>SELVDCLPK<longub>-COOH	486	GR	EA	Carbamidomethylation of C (19), Long ubiquitination (28), Oxidation of M (1)		Carbamidomethylation of C (19: 99.99999999682893, 25: 3.1710625173522516E-9), Long ubiquitination (17: 3.3111569092448028E-9, 28: 99.99999999668884), Oxidation of M (1: 100.0)	Carbamidomethylation of C (19: 93.33333333333333), Long ubiquitination (28: 93.33333333333333), Oxidation of M (1: 93.33333333333333)	1	7.53328	87.574
1235	Q685J3	Single Protein	SLVYGLVGAGVVLMLIILVALLMLVFRSKR	2	NH2-SLVYGLVGAGVVLM<ox>LIILVALLMLVFRSK<ub>R-COOH	4389	QK	EV	Oxidation of M (14), Ubiquitination of K (29)		Oxidation of M (14: 99.99950481837955, 23: 4.951816204486861E-4), Ubiquitination of K (29: 100.0)	Oxidation of M (14: 96.19047619047619), Ubiquitination of K (29: 96.19047619047619)	1	8.50238	91.9075
1865	Q6P1N0	Single Protein	GLEPMLEASRNGLPVDITK	1	NH2-GLEPM<ox>LEASRNGLPVDITK<ub>-COOH	529	AK	VP	Oxidation of M (5), Ubiquitination of K (19)		Oxidation of M (5: 100.0), Ubiquitination of K (19: 100.0)	Oxidation of M (5: 90.47619047619048), Ubiquitination of K (19: 90.47619047619048)	1	5.86996	82.0894
2025	Q7Z2T5	Single Protein	VTKMDANVLMHLR	1	NH2-VTK<ub>M<ox>DANVLM<ox>HLR-COOH	353	IK	SF	Oxidation of M (4, 10), Ubiquitination of K (3)		Oxidation of M (4: 100.0, 10: 100.0), Ubiquitination of K (3: 100.0)	Oxidation of M (4: 21.58730158730159, 10: 21.58730158730159), Ubiquitination of K (3: 21.58730158730159)	1	5.20806	79.6407
1514	Q7Z6G8	Single Protein	MRANCQKSTEQMK	2	NH2-MRANC<cmm>QK<ub>STEQM<ox>K<ub>-COOH	1088	AK	KV	Carbamidomethylation of C (5), Oxidation of M (12), Ubiquitination of K (13, 7)		Carbamidomethylation of C (5: 100.0), Oxidation of M (1: 5.052703173082952E-5, 12: 99.99994947296827), Ubiquitination of K (7: 100.0, 13: 100.0)		1	2.70647	63.0753
150	Q86WI3	Single Protein	ALMRALEGKWMLK	2	NH2-ALM<ox>RALEGK<longub>WMLK<ub>-COOH	1541	TK	RL	Long ubiquitination (9), Oxidation of M (3), Ubiquitination of K (13)		Long ubiquitination (9: 99.97150708279013, 13: 0.02849291720987231), Oxidation of M (3: 99.99999999999768, 11: 2.3142375733801056E-12), Ubiquitination of K (9: 0.026910348918660846, 13: 99.97308965108135)	Oxidation of M (3: 18.73015873015873)	1	5.25764	80.2326
1745	Q8IUZ0	Single Protein	NSYMKLCLQQITDQK	1	NH2-NSYM<ox>KLC<cmm>LQQITDQK<ub>-COOH	672	NK		Carbamidomethylation of C (7), Oxidation of M (4), Ubiquitination of K (15)		Carbamidomethylation of C (7: 100.0), Oxidation of M (4: 100.0), Ubiquitination of K (5: 2.7205136522181017E-10, 15: 99.99999999972795)		1	2.54698	60.9195
1682	Q8IVL1	Single Protein	LQSLTMTAEQKDSELNELR	1	NH2-LQSLTM<ox>TAEQK<ub>DSELNELR-COOH	1735	IR	KT	Oxidation of M (6), Ubiquitination of K (11)		Oxidation of M (6: 100.0), Ubiquitination of K (11: 100.0)	Oxidation of M (6: 66.03174603174602), Ubiquitination of K (11: 66.03174603174602)	1	2.57321	60.452
1864	Q8TAE8	Single Protein	EREQHIAECMAK	1	NH2-EREQHIAECM<ox>AK<longub>-COOH	116	RR	MP	Long ubiquitination (12), Oxidation of M (10)		Long ubiquitination (12: 100.0), Oxidation of M (10: 100.0)		1	3.11546	60.479
2613	Q92913	Single Protein	SVSGVLNGGKSMSHNEST	1	NH2-SVSGVLNGGK<ub>SM<ox>SHNEST-COOH	228	SR		Oxidation of M (12), Ubiquitination of K (10)		Oxidation of M (12: 100.0), Ubiquitination of K (10: 100.0)	Oxidation of M (12: 80.0), Ubiquitination of K (10: 80.0)	2	2.66661	57.485
1132	Q96AG3	Single Protein	EGIGRVIGMGVPHSK	1	NH2-EGIGRVIGM<ox>GVPHSK<longub>-COOH	242	VK	RL	Long ubiquitination (15), Oxidation of M (9)		Long ubiquitination (15: 100.0), Oxidation of M (9: 100.0)		2	3.92802	68.1465
1805	Q96N23	Single Protein	FKAAVMEIGRSAEMQQR	2	NH2-FK<ub>AAVMEIGRSAEM<ox>QQR-COOH	1396	LK	IR	Oxidation of M (14), Ubiquitination of K (2)		Oxidation of M (6: 2.644751176071773E-6, 14: 99.99999735524882), Ubiquitination of K (2: 100.0)	Oxidation of M (14: 15.873015873015872), Ubiquitination of K (2: 15.873015873015872)	1	3.40128	63.5838
350	Q96RY7	Single Protein	GVQMDRAVMLYHKAGHFSK	2	NH2-GVQM<ox>DRAVMLYHKAGHFSK<ub>-COOH	1078	EK	AL	Oxidation of M (4), Ubiquitination of K (19)		Oxidation of M (4: 99.99998478156108, 9: 50.0), Ubiquitination of K (13: 0.0359177325927856, 19: 99.99996411680307)	Oxidation of M (4: 82.53968253968253), Ubiquitination of K (19: 82.53968253968253)	2	5.30051	80.4734
625	Q9H0A0	Single Protein	LFNEVQEKAIEEQMVAAK	1	NH2-LFNEVQEKAIEEQM<ox>VAAK<ub>-COOH	905	VK	DV	Oxidation of M (14), Ubiquitination of K (18)		Oxidation of M (14: 100.0), Ubiquitination of K (8: 4.33780461904723E-10, 18: 99.99999999981998)	Oxidation of M (14: 66.03174603174602), Ubiquitination of K (18: 66.03174603174602)	2	2.48178	61.4035
1380	Q9H0C5	Single Protein	KQTLGQNDTGFSCDGTANTFRVMFK	2	NH2-K<longub>QTLGQNDTGFSCDGTANTFRVM<ox>FK<ub>-COOH	388	EK	EP	Long ubiquitination (1), Oxidation of M (23), Ubiquitination of K (25)		Long ubiquitination (1: 100.0, 25: 3.433320345613003E-13), Oxidation of M (23: 100.0), Ubiquitination of K (1: 1.9934594922931208E-19, 25: 100.0)	Long ubiquitination (1: 74.28571428571429), Oxidation of M (23: 74.28571428571429), Ubiquitination of K (25: 74.28571428571429)	2	4.52638	72.9412
2581	Q9H2C8	Single Protein	LFQTCISHICAVLVFYIPIISLTMVHRFGK	1	NH2-LFQTC<cmm>ISHIC<cmm>AVLVFYIPIISLTM<ox>VHRFGK<longub>-COOH	246	HK	HL	Carbamidomethylation of C (10, 5), Long ubiquitination (30), Oxidation of M (24)		Carbamidomethylation of C (5: 100.0, 10: 100.0), Long ubiquitination (30: 100.0), Oxidation of M (24: 100.0)	Carbamidomethylation of C (5: 70.15873015873015, 10: 70.15873015873015), Long ubiquitination (30: 70.15873015873015), Oxidation of M (24: 70.15873015873015)	1	2.76206	64.2458
1279	Q9H7D0	Single Protein	TPKNVEVTMSVHDEEGK	1	NH2-TPKNVEVTM<ox>SVHDEEGK<ub>-COOH	462	KK	LL	Oxidation of M (9), Ubiquitination of K (17)		Oxidation of M (9: 100.0), Ubiquitination of K (3: 2.7586625113783024E-12, 17: 100.0)		2	2.77954	64.2458
1943	Q9HB96	Single Protein	DQPVMAVKTGEDGSNLDDAKGLAESLELPK	2	NH2-DQPVM<ox>AVK<ub>TGEDGSNLDDAKGLAESLELPK<ub>-COOH	253	IK	AI	Oxidation of M (5), Ubiquitination of K (30, 8)		Oxidation of M (5: 100.0), Ubiquitination of K (8: 50.00014080520143, 20: 50.00014080520143, 30: 99.99971838959713)	Oxidation of M (5: 66.34920634920634), Ubiquitination of K (8: 66.34920634920634, 30: 66.34920634920634)	1	2.39223	57.7381
1603	Q9ULM6	Single Protein	SWIMLQEPDRTRPTALFSVMCYNVLCDK	1	NH2-SWIM<ox>LQEPDRTRPTALFSVM<ox>CYNVLCDK<longub>-COOH	173	PR	YA	Long ubiquitination (28), Oxidation of M (4, 20)		Long ubiquitination (28: 100.0), Oxidation of M (4: 100.0, 20: 100.0)	Long ubiquitination (28: 85.07936507936508), Oxidation of M (4: 85.07936507936508, 20: 85.07936507936508)	2	6.9508	87.0056
1835	A5LHX3	Single Protein	ELREGQLPSVASAAKLLSAMMSQYR	2	pyro-ELREGQLPSVASAAK<longub>LLSAMM<ox>SQYR-COOH	116	LR	GL	Long ubiquitination (15), Oxidation of M (21), Pyrolidone from E (1)		Long ubiquitination (15: 100.0), Oxidation of M (20: 50.0, 21: 50.0), Pyrolidone from E (0: 100.0)	Long ubiquitination (15: 50.48543689320388), Oxidation of M (21: 50.48543689320388), Pyrolidone from E (1: 50.48543689320388)	1	3.05267	70.5479
200	A8MTI9	Single Protein	EAFLALAQLLTSKNLPDTVDGQLPMGPHSR	1	pyro-EAFLALAQLLTSK<ub>NLPDTVDGQLPM<ox>GPHSR-COOH	22	EK	AS	Oxidation of M (25), Pyrolidone from E (1), Ubiquitination of K (13)		Oxidation of M (25: 100.0), Pyrolidone from E (0: 100.0), Ubiquitination of K (13: 100.0)	Oxidation of M (25: 63.95348837209303), Pyrolidone from E (1: 63.95348837209303), Ubiquitination of K (13: 63.95348837209303)	1	4.43137	80.6897
2470	P30926	Single Protein	FRQDVQEALEGVSFIAQHMK	1	NH2-FRQDVQEALEGVSFIAQHM<ox>K<longub>-COOH	420	GR	ND	Long ubiquitination (20), Oxidation of M (19)		Long ubiquitination (20: 100.0), Oxidation of M (19: 100.0)	Long ubiquitination (20: 74.11764705882354), Oxidation of M (19: 74.11764705882354)	1	5.86996	79.6748
1190	P78527	Single Protein	MIDSARKQNNFSLAMK	2	NH2-M<ox>IDSARK<longub>QNNFSLAM<ox>K<longub>-COOH	3242	MK	LL	Long ubiquitination (16, 7), Oxidation of M (1, 15)		Long ubiquitination (7: 100.0, 16: 100.0), Oxidation of M (1: 100.0, 15: 100.0)	Long ubiquitination (7: 50.78125, 16: 50.78125), Oxidation of M (1: 50.78125, 15: 50.78125)	1	3.07869	70.7483
2610	Q13072	Single Protein	MAARAVFLALSAQLLQARLMK	2	NH2-M<ox>AARAVFLALSAQLLQARLM<ox>K<ub>-COOH	1		EE	Oxidation of M (20, 1), Ubiquitination of K (21)		Oxidation of M (1: 100.0, 20: 100.0), Ubiquitination of K (21: 100.0)	Oxidation of M (1: 50.78125, 20: 50.78125), Ubiquitination of K (21: 50.78125)	1	3.07869	70.7483
427	Q53GL0	Single Protein	MKKNNSAK	2	ace-M<ox>K<ub>K<ub>NNSAK<ub>-COOH	2	M	RG	Acetylation of protein N-term (1), Oxidation of M (1), Ubiquitination of K (8, 2, 3)		Acetylation of protein N-term (0: 100.0), Oxidation of M (1: 100.0), Ubiquitination of K (2: 100.0, 3: 100.0, 8: 100.0)	Acetylation of protein N-term (1: 88.04347826086956), Oxidation of M (1: 88.04347826086956), Ubiquitination of K (2: 88.04347826086956, 3: 88.04347826086956, 8: 88.04347826086956)	1	9.22395	93.5484
1331	Q709C8	Single Protein	CRFQHPSTMHILQPMDIHVELAK	1	NH2-CRFQHPSTMHILQPM<ox>DIHVELAK<ub>-COOH	770	KK	AM	Oxidation of M (15), Ubiquitination of K (23)		Oxidation of M (9: 0.09569079561351211, 15: 99.9043092043865), Ubiquitination of K (23: 100.0)	Oxidation of M (15: 74.19354838709677), Ubiquitination of K (23: 74.19354838709677)	1	5.88272	85.8333
2214	Q8IYD2	Single Protein	IMVIGGVGTNQLPLKVVEMYNIDEGK	1	NH2-IMVIGGVGTNQLPLK<ub>VVEM<ox>YNIDEGK<ub>-COOH	81	KR	WK	Oxidation of M (19), Ubiquitination of K (26, 15)		Oxidation of M (2: 50.0, 19: 50.0), Ubiquitination of K (15: 100.0, 26: 100.0)	Oxidation of M (19: 74.11764705882354), Ubiquitination of K (15: 74.11764705882354, 26: 74.11764705882354)	1	5.86996	79.6748
1158	Q8TBC3	Single Protein	MLDEKTPPSPSGQPEEPGMVR	1	NH2-M<ox>LDEK<longub>TPPSPSGQPEEPGMVR-COOH	177	GR	LV	Long ubiquitination (5), Oxidation of M (1)		Long ubiquitination (5: 100.0), Oxidation of M (1: 100.0, 19: 6.813984148407846E-17)	Long ubiquitination (5: 50.0), Oxidation of M (1: 50.0)	1	3.0103	71.3178
942	Q92841	Single Protein	KLMQLVDHR	1	NH2-K<longub>LM<ox>QLVDHR-COOH	547	NP	GG	Long ubiquitination (1), Oxidation of M (3)		Long ubiquitination (1: 100.0), Oxidation of M (3: 100.0)	Long ubiquitination (1: 77.38095238095238), Oxidation of M (3: 77.38095238095238)	1	6.45526	90.2439
1138	Q96AG3	Single Protein	EGIGRVIGMGVPHSK	1	NH2-EGIGRVIGM<ox>GVPHSK<longub>-COOH	242	VK	RL	Long ubiquitination (15), Oxidation of M (9)		Long ubiquitination (15: 100.0), Oxidation of M (9: 100.0)	Long ubiquitination (15: 77.57009345794393), Oxidation of M (9: 77.57009345794393)	1	6.49173	89.4309
1560	Q9BVA6	Single Protein	LEARAALNQALEMK	1	NH2-LEARAALNQALEM<ox>K<ub>-COOH	104	GK	RQ	Oxidation of M (13), Ubiquitination of K (14)		Oxidation of M (13: 100.0), Ubiquitination of K (14: 100.0)	Oxidation of M (13: 50.78125), Ubiquitination of K (14: 50.78125)	1	3.07869	70.7483
1339	Q9BVW5	Single Protein	MLIRHMEHWAHRLFPK	2	NH2-M<ox>LIRHMEHWAHRLFPK<ub>-COOH	102	LK	LQ	Oxidation of M (1), Ubiquitination of K (16)		Oxidation of M (1: 99.90044007580954, 6: 0.0995599241904566), Ubiquitination of K (16: 100.0)	Oxidation of M (1: 88.07339449541286), Ubiquitination of K (16: 88.07339449541286)	1	9.23483	94.4
935	Q9H4I3	Single Protein	CVPSVVVGVVGMGHVPGIEK	0	NH2-C<cmm>VPSVVVGVVGM<ox>GHVPGIEK<ub>-COOH	287	RK	NW	Carbamidomethylation of C (1), Oxidation of M (12), Ubiquitination of K (20)		Carbamidomethylation of C (1: 100.0), Oxidation of M (12: 100.0), Ubiquitination of K (20: 100.0)	Carbamidomethylation of C (1: 50.4), Oxidation of M (12: 50.4), Ubiquitination of K (20: 50.4)	1	3.04518	74.8031
2650	Q9NZD2	Single Protein	TLQNILEVEKEMYGAEWPK	1	NH2-TLQNILEVEK<longub>EM<ox>YGAEWPK<longub>-COOH	69	FR	VG	Long ubiquitination (10, 19), Oxidation of M (12)		Long ubiquitination (10: 100.0, 19: 100.0), Oxidation of M (12: 100.0)	Long ubiquitination (10: 62.60869565217391, 19: 62.60869565217391), Oxidation of M (12: 62.60869565217391)	1	4.27229	80.4348
2265	Q9ULH7	Single Protein	EQLVDQGIMPPLK	0	NH2-EQLVDQGIM<ox>PPLK<longub>-COOH	53	TR	SP	Long ubiquitination (13), Oxidation of M (9)		Long ubiquitination (13: 100.0), Oxidation of M (9: 100.0)	Long ubiquitination (13: 50.0), Oxidation of M (9: 50.0)	1	3.0103	71.3178
D4h
AKT_04	Q16288	Related Proteins	WMPPESIMYRK	1	NH2-WM<ox>PPESIMYRK<ub>-COOH	736; 719	IR; IR	FT; FT	Oxidation of M (2), Ubiquitination of K (11)		Oxidation of M (2: 99.9999999999999, 8: 50.0), Ubiquitination of K (11: 100.0)	Oxidation of M (2: 44.44444444444444), Ubiquitination of K (11: 44.44444444444444)	25	53.3183	98.3193
AKT_04	P21817	Single Protein	EKEMITSLFCKLAALVR	2	pyro-EK<ub>EM<ox>ITSLFC<cmm>K<ub>LAALVR-COOH	3035	NK	HR	Carbamidomethylation of C (10), Oxidation of M (4), Pyrolidone from E (1), Ubiquitination of K (2, 11)		Carbamidomethylation of C (10: 100.0), Oxidation of M (4: 100.0), Pyrolidone from E (0: 100.0), Ubiquitination of K (2: 100.0, 11: 100.0)	Carbamidomethylation of C (10: 67.5), Oxidation of M (4: 67.5), Pyrolidone from E (1: 67.5), Ubiquitination of K (2: 67.5, 11: 67.5)	3	11.4239	80
AKT_04	Q9UQ80	Single Protein	ARMGVVECAK	1	NH2-ARM<ox>GVVEC<cmm>AK<ub>-COOH	289	KK	HE	Carbamidomethylation of C (8), Oxidation of M (3), Ubiquitination of K (10)		Carbamidomethylation of C (8: 100.0), Oxidation of M (3: 100.0), Ubiquitination of K (10: 100.0)	Carbamidomethylation of C (8: 96.72131147540983), Oxidation of M (3: 96.72131147540983), Ubiquitination of K (10: 96.72131147540983)	3	19.1987	95.8158
AKT_04	Q6ZMY6	Single Protein	WILSASKDRTMR	2	NH2-WILSASK<ub>DRTM<ox>R-COOH	377	KK	LW	Oxidation of M (11), Ubiquitination of K (7)		Oxidation of M (11: 100.0), Ubiquitination of K (7: 100.0)	Oxidation of M (11: 65.53191489361703), Ubiquitination of K (7: 65.53191489361703)	19	56.2481	98.3193
AKT_04	P21333	Single Protein	AYGPGIEPTGNMVK	0	NH2-AYGPGIEPTGNM<ox>VK<ub>-COOH	286	AR	KR	Oxidation of M (12), Ubiquitination of K (14)		Oxidation of M (12: 100.0), Ubiquitination of K (14: 100.0)	Oxidation of M (12: 92.51012145748987), Ubiquitination of K (14: 92.51012145748987)	1	11.9826	88
AKT_04	Q8NEN0	Single Protein	FISGNLGFLNEMISK	0	NH2-FISGNLGFLNEM<ox>ISK<ub>-COOH	403	IK	GA	Oxidation of M (12), Ubiquitination of K (15)		Oxidation of M (12: 100.0), Ubiquitination of K (15: 100.0)	Oxidation of M (12: 100.0), Ubiquitination of K (15: 100.0)	4	100	100
AKT_04	P04083	Single Protein	IMVSRSEIDMNDIK	1	NH2-IM<ox>VSRSEIDMNDIK<ub>-COOH	299	IR	AF	Oxidation of M (2), Ubiquitination of K (14)		Oxidation of M (2: 99.99999999988061, 10: 0.0391822399193954), Ubiquitination of K (14: 100.0)	Oxidation of M (2: 52.33968804159446), Ubiquitination of K (14: 52.33968804159446)	8	17.5283	95.8158
AKT_04	P18206	Single Protein	TCKMLGQMTDQVADLR	1	NH2-TCK<ubq long k>M<ox>LGQMTDQVADLR-COOH	324	LG	AR	Oxidation of M (4), Ubiquitination long of K (3)		Oxidation of M (4: 99.99999999934754, 8: 3.5813962827815437E-6), Ubiquitination long of K (3: 100.0)	Oxidation of M (4: 100.0), Ubiquitination long of K (3: 100.0)	2	100	100
AKT_04	Q86YA3	Single Protein	GALMNGVTEIERSPLLEWLPTLCFYNVK	1	NH2-GALM<ox>NGVTEIERSPLLEWLPTLCFYNVK<ub>-COOH	1894	YK	GL	Oxidation of M (4), Ubiquitination of K (28)		Oxidation of M (4: 100.0), Ubiquitination of K (28: 100.0)	Oxidation of M (4: 95.29652351738241), Ubiquitination of K (28: 95.29652351738241)	4	25.7965	95
AKT_04	Q9NZN1	Single Protein	LLYPMESK	0	NH2-LLYPM<ox>ESK<ub>-COOH	244	PK	LT	Oxidation of M (5), Ubiquitination of K (8)		Oxidation of M (5: 100.0), Ubiquitination of K (8: 100.0)	Oxidation of M (5: 94.97991967871486), Ubiquitination of K (8: 94.97991967871486)	5	39.0722	99.1597
265	P36507	Single Protein	MLTNHTFIK	0	NH2-M<ox>LTNHTFIK<ub>-COOH	362	LK	RS	Oxidation of M (1), Ubiquitination of K (9)		Oxidation of M (1: 100.0), Ubiquitination of K (9: 100.0)	Oxidation of M (1: 53.4412955465587), Ubiquitination of K (9: 53.4412955465587)	1	3.92477	68.2635
411	P42892	Single Protein	FMEVMYGTK	0	NH2-FM<ox>EVMYGTK<ub>-COOH	417	EK	KT	Oxidation of M (2), Ubiquitination of K (9)		Oxidation of M (2: 50.0, 5: 50.0), Ubiquitination of K (9: 100.0)	Oxidation of M (2: 52.76595744680851), Ubiquitination of K (9: 52.76595744680851)	1	3.8818	70.6587
465	P63244	Single Protein	TPQFPDMILSASRDK	1	NH2-TPQFPDM<ox>ILSASRDK<ub>-COOH	24	AT	TI	Oxidation of M (7), Ubiquitination of K (15)		Oxidation of M (7: 100.0), Ubiquitination of K (15: 100.0)	Oxidation of M (7: 64.76683937823834), Ubiquitination of K (15: 64.76683937823834)	1	5.17416	82.6347
542	Q96C34	Single Protein	QSLLTAIHMVLTEHDPFK	0	pyro-QSLLTAIHM<ox>VLTEHDPFK<ub>-COOH	514	PK	RS	Oxidation of M (9), Pyrolidone from Q (1), Ubiquitination of K (18)		Oxidation of M (9: 100.0), Pyrolidone from Q (0: 100.0), Ubiquitination of K (18: 100.0)	Oxidation of M (9: 83.16831683168317), Pyrolidone from Q (1: 83.16831683168317), Ubiquitination of K (18: 83.16831683168317)	1	6.90196	85.119
693	P04090	Related Proteins	ELVRAQIAICGMSTWSK	1	NH2-ELVRAQIAICGM<ox>STWSK<ub>-COOH	38; 38	GR; GR	RS; RS	Oxidation of M (12), Ubiquitination of K (17)		Oxidation of M (12: 100.0), Ubiquitination of K (17: 100.0)	Oxidation of M (12: 52.76595744680851), Ubiquitination of K (17: 52.76595744680851)	1	3.8818	70.6587
757	Q9H871	Single Protein	EMLIAQNSSLEFK	0	NH2-EM<ox>LIAQNSSLEFK<ub>-COOH	181	NR	LH	Oxidation of M (2), Ubiquitination of K (13)		Oxidation of M (2: 100.0), Ubiquitination of K (13: 100.0)	Oxidation of M (2: 42.35807860262008), Ubiquitination of K (13: 42.35807860262008)	1	3.95129	71.4286
815	Q96AY3	Single Protein	LMPGQDPEK	0	NH2-LM<ox>PGQDPEK<ub>-COOH	537	GR	TI	Oxidation of M (2), Ubiquitination of K (9)		Oxidation of M (2: 100.0), Ubiquitination of K (9: 100.0)	Oxidation of M (2: 51.082251082251084), Ubiquitination of K (9: 51.082251082251084)	1	3.85351	71.4286
869	Q68EM7	Single Protein	ESFGVKLMDFQAHR	1	pyro-ESFGVK<longub>LM<ox>DFQAHR-COOH	496	KK	RG	Long ubiquitination (6), Oxidation of M (8), Pyrolidone from E (1)		Long ubiquitination (6: 100.0), Oxidation of M (8: 100.0), Pyrolidone from E (0: 100.0)	Long ubiquitination (6: 77.77777777777779), Oxidation of M (8: 77.77777777777779), Pyrolidone from E (1: 77.77777777777779)	1	6.51906	84.4311
1201	Q96C10	Single Protein	LMDQIHDHLEMPELSRK	1	NH2-LM<ox>DQIHDHLEMPELSRK<ub>-COOH	236	KK	FG	Oxidation of M (2), Ubiquitination of K (17)		Oxidation of M (2: 50.0, 11: 50.0), Ubiquitination of K (17: 100.0)	Oxidation of M (2: 97.96954314720813), Ubiquitination of K (17: 97.96954314720813)	1	16.902	99.3902
1627	Q9NQS7	Single Protein	RNTPLRMDPK	2	NH2-RNTPLRM<ox>DPK<longub>-COOH	522	IK	CS	Long ubiquitination (10), Oxidation of M (7)		Long ubiquitination (10: 100.0), Oxidation of M (7: 100.0)	Long ubiquitination (10: 81.77339901477832), Oxidation of M (7: 81.77339901477832)	1	7.63428	87.8049
1672	Q16206	Single Protein	QEMTGVGASLEK	0	pyro-QEM<ox>TGVGASLEK<ub>-COOH	586	FK	RW	Oxidation of M (3), Pyrolidone from Q (1), Ubiquitination of K (12)		Oxidation of M (3: 100.0), Pyrolidone from Q (0: 100.0), Ubiquitination of K (12: 100.0)	Oxidation of M (3: 52.76595744680851), Pyrolidone from Q (1: 52.76595744680851), Ubiquitination of K (12: 52.76595744680851)	1	3.8818	70.6587
1687	O15315	Single Protein	LSRHQILTCQDFLCLSPLELMK	1	NH2-LSRHQILTCQDFLCLSPLELM<ox>K<ub>-COOH	19	DR	VT	Oxidation of M (21), Ubiquitination of K (22)		Oxidation of M (21: 100.0), Ubiquitination of K (22: 100.0)	Oxidation of M (21: 86.25), Ubiquitination of K (22: 86.25)	1	8.45098	89.697
1691	Q6ZVD8	Single Protein	QNSVNSGMLLPMSK	0	pyro-QNSVNSGM<ox>LLPM<ox>SK<ub>-COOH	1208	RR	DR	Oxidation of M (8, 12), Pyrolidone from Q (1), Ubiquitination of K (14)		Oxidation of M (8: 100.0, 12: 100.0), Pyrolidone from Q (0: 100.0), Ubiquitination of K (14: 100.0)	Oxidation of M (8: 53.21100917431192, 12: 53.21100917431192), Pyrolidone from Q (1: 53.21100917431192), Ubiquitination of K (14: 53.21100917431192)	1	3.916	69.1429
1794	O15015	Single Protein	KYPNLMALR	1	NH2-K<ub>YPNLM<ox>ALR-COOH	500	PR	NH	Oxidation of M (6), Ubiquitination of K (1)		Oxidation of M (6: 100.0), Ubiquitination of K (1: 100.0)	Oxidation of M (6: 77.77777777777779), Ubiquitination of K (1: 77.77777777777779)	1	6.51906	84.4311
2025	G9CGD6	Related Proteins	MEPVTKWSPK	1	NH2-M<ox>EPVTK<ub>WSPK<ub>-COOH	1; 1		QV; QV	Oxidation of M (1), Ubiquitination of K (6, 10)		Oxidation of M (1: 100.0), Ubiquitination of K (6: 100.0, 10: 100.0)	Oxidation of M (1: 80.61224489795919), Ubiquitination of K (6: 80.61224489795919, 10: 80.61224489795919)	1	6.61646	84.3373
2221	Q9H4K1	Single Protein	MRQNDKIMCILENR	2	ace-MRQNDK<ub>IM<ox>CILENR-COOH	1		KK	Acetylation of protein N-term (1), Oxidation of M (8), Ubiquitination of K (6)		Acetylation of protein N-term (0: 100.0), Oxidation of M (1: 1.0549613567337096E-4, 8: 99.99989450386433), Ubiquitination of K (6: 100.0)	Acetylation of protein N-term (1: 83.16831683168317), Oxidation of M (8: 83.16831683168317), Ubiquitination of K (6: 83.16831683168317)	1	7.92975	86.9822
2611	A2RU30	Single Protein	MEASVLSPTSWEK	0	NH2-M<ox>EASVLSPTSWEK<ub>-COOH	1		RR	Oxidation of M (1), Ubiquitination of K (13)		Oxidation of M (1: 100.0), Ubiquitination of K (13: 100.0)	Oxidation of M (1: 83.16831683168317), Ubiquitination of K (13: 83.16831683168317)	1	7.92975	86.9822
3165	Q5T848	Single Protein	MITNNPHLQK	0	NH2-M<ox>ITNNPHLQK<ub>-COOH	733	KK	KR	Oxidation of M (1), Ubiquitination of K (10)		Oxidation of M (1: 100.0), Ubiquitination of K (10: 100.0)	Oxidation of M (1: 51.082251082251084), Ubiquitination of K (10: 51.082251082251084)	1	3.85351	71.4286
36	Q6AI39	Single Protein	NEVLHTDIMK	0	NH2-NEVLHTDIM<ox>K<longub>-COOH	983	PK	GS	Long ubiquitination (10), Oxidation of M (9)		Long ubiquitination (10: 100.0), Oxidation of M (9: 100.0)	Long ubiquitination (10: 80.28240040342915), Oxidation of M (9: 80.28240040342915)	1	13.4635	98.2405
70	O15047	Single Protein	SIMQRDLNRK	2	NH2-SIM<ox>QRDLNRK<ub>-COOH	804	MK	MV	Oxidation of M (3), Ubiquitination of K (10)		Oxidation of M (3: 100.0), Ubiquitination of K (10: 100.0)	Oxidation of M (3: 57.30110775427997), Ubiquitination of K (10: 57.30110775427997)	1	4.2064	73.3918
429	P19367	Single Protein	MLPTFVRSIPDGSEK	1	NH2-M<ox>LPTFVRSIPDGSEK<ub>-COOH	63	VK	GD	Oxidation of M (1), Ubiquitination of K (15)		Oxidation of M (1: 100.0), Ubiquitination of K (15: 100.0)	Oxidation of M (1: 79.15407854984893), Ubiquitination of K (15: 79.15407854984893)	1	15.563	98.5294
606	Q9UKV0	Single Protein	IIEIQSMSLK	0	NH2-IIEIQSM<ox>SLK<ub>-COOH	1000	QK	FS	Oxidation of M (7), Ubiquitination of K (10)		Oxidation of M (7: 100.0), Ubiquitination of K (10: 100.0)	Oxidation of M (7: 67.7403120281832), Ubiquitination of K (10: 67.7403120281832)	1	3.6494	62.908
1227	A0A1B0GV03	Single Protein	QEKQMLKQK	2	pyro-QEK<ub>QM<ox>LK<ub>QK<ub>-COOH	344	RK	EQ	Oxidation of M (5), Pyrolidone from Q (1), Ubiquitination of K (9, 3, 7)		Oxidation of M (5: 100.0), Pyrolidone from Q (0: 100.0), Ubiquitination of K (3: 100.0, 7: 100.0, 9: 100.0)	Oxidation of M (5: 65.10000000000001), Pyrolidone from Q (1: 65.10000000000001), Ubiquitination of K (3: 65.10000000000001, 7: 65.10000000000001, 9: 65.10000000000001)	1	4.9091	86.3501
1671	Q12884	Single Protein	MILPPQFDRSK	1	NH2-M<ox>ILPPQFDRSK<ub>-COOH	522	YK	KY	Oxidation of M (1), Ubiquitination of K (11)		Oxidation of M (1: 100.0), Ubiquitination of K (11: 100.0)	Oxidation of M (1: 54.582074521651556), Ubiquitination of K (11: 54.582074521651556)	1	4.72965	84.0841
1673	Q8WZ84	Single Protein	MLVNFLGK	0	NH2-M<ox>LVNFLGK<ub>-COOH	81	PK	KN	Oxidation of M (1), Ubiquitination of K (8)		Oxidation of M (1: 100.0), Ubiquitination of K (8: 100.0)	Oxidation of M (1: 63.58585858585859), Ubiquitination of K (8: 63.58585858585859)	1	5.1073	86.8421
1744	O43252	Single Protein	MEIPGSLCK	0	NH2-M<ox>EIPGSLCK<ub>-COOH	1		KV	Oxidation of M (1), Ubiquitination of K (9)		Oxidation of M (1: 100.0), Ubiquitination of K (9: 100.0)	Oxidation of M (1: 68.39195979899498), Ubiquitination of K (9: 68.39195979899498)	1	3.66532	66.3768
2357	Q8WWI1	Single Protein	QQILQEMRK	1	pyro-QQILQEM<ox>RK<ub>-COOH	1468	ER	RT	Oxidation of M (7), Pyrolidone from Q (1), Ubiquitination of K (9)		Oxidation of M (7: 100.0), Pyrolidone from Q (0: 100.0), Ubiquitination of K (9: 100.0)	Oxidation of M (7: 65.96701649175412), Pyrolidone from Q (1: 65.96701649175412), Ubiquitination of K (9: 65.96701649175412)	1	4.88402	84.9558
2623	P58304	Single Protein	MSKSALNQTK	1	NH2-M<ox>SK<ub>SALNQTK<ub>-COOH	135	RK	KR	Oxidation of M (1), Ubiquitination of K (10, 3)		Oxidation of M (1: 100.0), Ubiquitination of K (3: 100.0, 10: 100.0)	Oxidation of M (1: 52.11055276381909), Ubiquitination of K (3: 52.11055276381909, 10: 52.11055276381909)	1	4.11245	70.1493
2642	Q8N9C0	Single Protein	MIWIKGTEPLR	1	NH2-M<ox>IWIK<ub>GTEPLR-COOH	266	VK	IQ	Oxidation of M (1), Ubiquitination of K (5)		Oxidation of M (1: 100.0), Ubiquitination of K (5: 100.0)	Oxidation of M (1: 66.70025188916877), Ubiquitination of K (5: 66.70025188916877)	1	3.65329	64.3917
2658	O60508	Single Protein	LFPLSGHLLLSCSMDCK	0	NH2-LFPLSGHLLLSC<cmm>SM<ox>DC<cmm>K<ub>-COOH	296	VR	IK	Carbamidomethylation of C (16, 12), Oxidation of M (14), Ubiquitination of K (17)		Carbamidomethylation of C (12: 100.0, 16: 100.0), Oxidation of M (14: 100.0), Ubiquitination of K (17: 100.0)	Carbamidomethylation of C (12: 53.54291417165668, 16: 53.54291417165668), Oxidation of M (14: 53.54291417165668), Ubiquitination of K (17: 53.54291417165668)	1	4.41046	79.7619
2669	P04090	Single Protein	AVADSWMEEVIK	0	NH2-AVADSWM<ox>EEVIK<ub>-COOH	22	SR	LC	Oxidation of M (7), Ubiquitination of K (12)		Oxidation of M (7: 100.0), Ubiquitination of K (12: 100.0)	Oxidation of M (7: 55.89123867069487), Ubiquitination of K (12: 55.89123867069487)	1	4.34241	79.8193
2753	A0A087WXS9	Single Protein	MKNPGRYQIMK	2	NH2-M<ox>K<ub>NPGRYQIMK<ub>-COOH	122	MK	EK	Oxidation of M (1), Ubiquitination of K (2, 11)		Oxidation of M (1: 99.99230809866633, 10: 0.00769190133367431), Ubiquitination of K (2: 100.0, 11: 100.0)	Oxidation of M (1: 85.74277168494517), Ubiquitination of K (2: 85.74277168494517, 11: 85.74277168494517)	1	14.0654	97.9104
2817	Q9BW92	Single Protein	LASMAQKEPR	1	NH2-LASM<ox>AQK<longub>EPR-COOH	50	KR	TI	Long ubiquitination (7), Oxidation of M (4)		Long ubiquitination (7: 100.0), Oxidation of M (4: 100.0)	Long ubiquitination (7: 49.4), Oxidation of M (4: 49.4)	1	3.69216	66.568
2840	Q9C0I3	Single Protein	TTTELTGTVPCAIMSPGKYR	1	NH2-TTTELTGTVPCAIM<ox>SPGK<ub>YR-COOH	306	TK	LE	Oxidation of M (14), Ubiquitination of K (18)		Oxidation of M (14: 100.0), Ubiquitination of K (18: 100.0)	Oxidation of M (14: 77.91687531296945), Ubiquitination of K (18: 77.91687531296945)	1	5.37973	89.049
2909	P43220	Single Protein	DSSMKPLK	0	NH2-DSSM<ox>K<ub>PLK<ub>-COOH	430	QR	CP	Oxidation of M (4), Ubiquitination of K (8, 5)		Oxidation of M (4: 100.0), Ubiquitination of K (5: 100.0, 8: 100.0)	Oxidation of M (4: 57.30110775427997), Ubiquitination of K (5: 57.30110775427997, 8: 57.30110775427997)	1	4.2064	73.3918
2911	Q5CZC0	Single Protein	MLPKLQPLKMFSDK	2	NH2-M<ox>LPK<ub>LQPLK<ub>MFSDK<ub>-COOH	3039	KK	SE	Oxidation of M (1), Ubiquitination of K (9, 4, 14)		Oxidation of M (1: 99.89453400831168, 10: 50.0), Ubiquitination of K (4: 100.0, 9: 100.0, 14: 100.0)	Oxidation of M (1: 54.582074521651556), Ubiquitination of K (4: 54.582074521651556, 9: 54.582074521651556, 14: 54.582074521651556)	3	5.61149	89.5727
DB1h
AKT_02	O14715	Related Proteins	KEMQELKLNSSK	2	NH2-K<ub>EM<ox>QELK<ub>LNSSK<ub>-COOH	823; 823	IK; IK	SA; SA	Oxidation of M (3), Ubiquitination of K (1, 12, 7)		Oxidation of M (3: 100.0), Ubiquitination of K (1: 100.0, 7: 100.0, 12: 100.0)	Oxidation of M (3: 99.56989247311829), Ubiquitination of K (1: 99.56989247311829, 7: 99.56989247311829, 12: 99.56989247311829)	1	26.2839	95.7746
AKT_02	P38646	Single Protein	MAGDNKLLGQFTLIGIPPAPR	1	NH2-M<ox>AGDNK<ub>LLGQFTLIGIPPAPR-COOH	493	RE	GV	Oxidation of M (1), Ubiquitination of K (6)		Oxidation of M (1: 100.0), Ubiquitination of K (6: 100.0)	Oxidation of M (1: 100.0), Ubiquitination of K (6: 100.0)	1	100	100
AKT_02	P04083	Single Protein	IMVSRSEIDMNDIK	1	NH2-IM<ox>VSRSEIDMNDIK<ub>-COOH	299	IR	AF	Oxidation of M (2), Ubiquitination of K (14)		Oxidation of M (2: 99.99999999996635, 10: 50.0), Ubiquitination of K (14: 100.0)	Oxidation of M (2: 53.69565217391305), Ubiquitination of K (14: 53.69565217391305)	9	26.7417	94.3662
AKT_02	P18206	Single Protein	TCKMLGQMTDQVADLR	1	NH2-TCK<ubq long k>M<ox>LGQMTDQVADLR-COOH	324	LG	AR	Oxidation of M (4), Ubiquitination long of K (3)		Oxidation of M (4: 99.99999999899029, 8: 5.034819679526415E-6), Ubiquitination long of K (3: 100.0)	Oxidation of M (4: 100.0), Ubiquitination long of K (3: 100.0)	2	100	100
AKT_02	Q32M92	Single Protein	VDGLMLKPTLLTPSQLK	0	NH2-VDGLM<ox>LK<ub>PTLLTPSQLK<ub>-COOH	92	SR	SP	Oxidation of M (5), Ubiquitination of K (17, 7)		Oxidation of M (5: 100.0), Ubiquitination of K (7: 100.0, 17: 100.0)	Oxidation of M (5: 92.34135667396062), Ubiquitination of K (7: 92.34135667396062, 17: 92.34135667396062)	3	28.8978	92.4242
AKT_02	Q9NZN1	Single Protein	LLYPMESK	0	NH2-LLYPM<ox>ESK<ub>-COOH	244	PK	LT	Oxidation of M (5), Ubiquitination of K (8)		Oxidation of M (5: 100.0), Ubiquitination of K (8: 100.0)	Oxidation of M (5: 93.60341151385927), Ubiquitination of K (8: 93.60341151385927)	2	18.4094	81.8182
1025	A6NH13	Single Protein	KMRCGESGAGPDPR	2	NH2-K<ub>M<ox>RC<cmm>GESGAGPDPR-COOH	55	GR	SN	Carbamidomethylation of C (4), Oxidation of M (2), Ubiquitination of K (1)		Carbamidomethylation of C (4: 100.0), Oxidation of M (2: 100.0), Ubiquitination of K (1: 100.0)	Carbamidomethylation of C (4: 45.751633986928105), Oxidation of M (2: 45.751633986928105), Ubiquitination of K (1: 45.751633986928105)	1	3.4559	58.0645
856	P10586	Single Protein	MRYEGVVDMFQTVKTLR	2	NH2-MRYEGVVDM<ox>FQTVK<ub>TLR-COOH	1859	ER	TQ	Oxidation of M (9), Ubiquitination of K (14)		Oxidation of M (1: 1.2741618726676491E-9, 9: 99.99999999872583), Ubiquitination of K (14: 100.0)	Oxidation of M (9: 98.92086330935251), Ubiquitination of K (14: 98.92086330935251)	1	18.1291	98.8764
1851	P31937	Single Protein	TPVGFIGLGNMGNPMAKNLMK	1	NH2-TPVGFIGLGNMGNPM<ox>AK<longub>NLMK<longub>-COOH	40	SK	HG	Long ubiquitination (17, 21), Oxidation of M (15)		Long ubiquitination (17: 100.0, 21: 100.0), Oxidation of M (11: 33.33333333333333, 15: 33.33333333333333, 20: 33.33333333333333)	Long ubiquitination (17: 69.4078947368421, 21: 69.4078947368421), Oxidation of M (15: 69.4078947368421)	1	3.9794	68.0473
88	P41586	Single Protein	MAGVVHVSLAALLLLPMAPAMHSDCIFK	0	ace-M<ox>AGVVHVSLAALLLLPM<ox>APAM<ox>HSDC<cmm>IFK<longub>-COOH	1		KE	Acetylation of protein N-term (1), Carbamidomethylation of C (25), Long ubiquitination (28), Oxidation of M (1, 17, 21)		Acetylation of protein N-term (0: 100.0), Carbamidomethylation of C (25: 100.0), Long ubiquitination (28: 100.0), Oxidation of M (1: 100.0, 17: 100.0, 21: 100.0)	Acetylation of protein N-term (1: 78.49829351535837), Carbamidomethylation of C (25: 78.49829351535837), Long ubiquitination (28: 78.49829351535837), Oxidation of M (1: 78.49829351535837, 17: 78.49829351535837, 21: 78.49829351535837)	1	5.59308	87.6453
267	P52948	Single Protein	FNPPTGTDTMVKAGVSTNISTK	1	NH2-FNPPTGTDTM<ox>VK<ub>AGVSTNISTK<ub>-COOH	164	IK	HQ	Oxidation of M (10), Ubiquitination of K (12, 22)		Oxidation of M (10: 100.0), Ubiquitination of K (12: 100.0, 22: 100.0)	Oxidation of M (10: 88.96797153024912), Ubiquitination of K (12: 88.96797153024912, 22: 88.96797153024912)	1	8.45098	94.0828
686	Q5T0J3	Single Protein	MIPVRGLWYCYLQVKK	2	NH2-M<ox>IPVRGLWYCYLQVK<ub>K<ub>-COOH	1		VR	Oxidation of M (1), Ubiquitination of K (16, 15)		Oxidation of M (1: 100.0), Ubiquitination of K (15: 100.0, 16: 100.0)	Oxidation of M (1: 72.0), Ubiquitination of K (15: 72.0, 16: 72.0)	1	4.60351	76.506
2369	Q5T7M9	Single Protein	QLYSCIALKVTANQMEMEHSLILNNLK	1	pyro-QLYSC<cmm>IALK<ub>VTANQMEM<ox>EHSLILNNLK<ub>-COOH	389	EK	TL	Carbamidomethylation of C (5), Oxidation of M (17), Pyrolidone from Q (1), Ubiquitination of K (9, 27)		Carbamidomethylation of C (5: 100.0), Oxidation of M (15: 50.0, 17: 50.0), Pyrolidone from Q (0: 100.0), Ubiquitination of K (9: 100.0, 27: 100.0)	Carbamidomethylation of C (5: 62.75862068965517), Oxidation of M (17: 62.75862068965517), Pyrolidone from Q (1: 62.75862068965517), Ubiquitination of K (9: 62.75862068965517, 27: 62.75862068965517)	1	4.05765	68.0233
100	Q6AI39	Single Protein	NEVLHTDIMK	0	NH2-NEVLHTDIM<ox>K<longub>-COOH	983	PK	GS	Long ubiquitination (10), Oxidation of M (9)		Long ubiquitination (10: 100.0), Oxidation of M (9: 100.0)	Long ubiquitination (10: 78.49829351535837), Oxidation of M (9: 78.49829351535837)	1	6.45892	89.5954
1319	Q86XA9	Single Protein	HCPLGIPHGKGKIIMTLAEDLLCSAAQNSR	2	NH2-HCPLGIPHGK<ub>GK<ub>IIM<ox>TLAEDLLCSAAQNSR-COOH	515	VK	LS	Oxidation of M (15), Ubiquitination of K (12, 10)		Oxidation of M (15: 100.0), Ubiquitination of K (10: 100.0, 12: 100.0)	Oxidation of M (15: 99.63768115942028), Ubiquitination of K (10: 99.63768115942028, 12: 99.63768115942028)	1	14.3136	98.1818
214	Q8NAA6	Single Protein	AKGRSSICLQASVWMAGGK	2	NH2-AK<ub>GRSSIC<cmm>LQASVWM<ox>AGGK<ub>-COOH	29	SK	LR	Carbamidomethylation of C (8), Oxidation of M (15), Ubiquitination of K (2, 19)		Carbamidomethylation of C (8: 100.0), Oxidation of M (15: 100.0), Ubiquitination of K (2: 100.0, 19: 100.0)	Carbamidomethylation of C (8: 95.35714285714285), Oxidation of M (15: 95.35714285714285), Ubiquitination of K (2: 95.35714285714285, 19: 95.35714285714285)	1	13.2565	98.2353
2723	Q9NST1	Single Protein	GGYMSKICNLLPIR	1	NH2-GGYM<ox>SK<ub>IC<cmm>NLLPIR-COOH	336	DK	IM	Carbamidomethylation of C (8), Oxidation of M (4), Ubiquitination of K (6)		Carbamidomethylation of C (8: 100.0), Oxidation of M (4: 100.0), Ubiquitination of K (6: 100.0)	Carbamidomethylation of C (8: 91.43835616438356), Oxidation of M (4: 91.43835616438356), Ubiquitination of K (6: 91.43835616438356)	1	9.27712	94.0828
415	Q9UH65	Single Protein	ELEDMYLKLQEALEDER	1	pyro-ELEDM<ox>YLK<longub>LQEALEDER-COOH	421	VR	QA	Long ubiquitination (8), Oxidation of M (5), Pyrolidone from E (1)		Long ubiquitination (8: 100.0), Oxidation of M (5: 100.0), Pyrolidone from E (0: 100.0)	Long ubiquitination (8: 82.06896551724138), Oxidation of M (5: 82.06896551724138), Pyrolidone from E (1: 82.06896551724138)	1	5.74031	87.7907
1933	Q9Y312	Single Protein	MIPPGIHFLHYSSVDK	0	NH2-M<ox>IPPGIHFLHYSSVDK<ub>-COOH	50	VK	AN	Oxidation of M (1), Ubiquitination of K (16)		Oxidation of M (1: 100.0), Ubiquitination of K (16: 100.0)	Oxidation of M (1: 67.14801444043322), Ubiquitination of K (16: 67.14801444043322)	1	5.22591	83.6257
12	O94880	Single Protein	LHYHLGCLDPPLTRMPRK	2	NH2-LHYHLGC<cmm>LDPPLTRM<ox>PRK<ub>-COOH	748	CK	TK	Carbamidomethylation of C (7), Oxidation of M (15), Ubiquitination of K (18)		Carbamidomethylation of C (7: 100.0), Oxidation of M (15: 100.0), Ubiquitination of K (18: 100.0)	Carbamidomethylation of C (7: 63.41814690350456), Oxidation of M (15: 63.41814690350456), Ubiquitination of K (18: 63.41814690350456)	1	100	100
311	Q9BV73	Single Protein	EAMRAAQAGSLEISK	1	pyro-EAM<ox>RAAQAGSLEISK<ub>-COOH	2313	KR	AT	Oxidation of M (3), Pyrolidone from E (1), Ubiquitination of K (15)		Oxidation of M (3: 100.0), Pyrolidone from E (0: 100.0), Ubiquitination of K (15: 100.0)	Oxidation of M (3: 63.961813842482094), Pyrolidone from E (1: 63.961813842482094), Ubiquitination of K (15: 63.961813842482094)	1	4.86076	82.5532
318	Q99728	Single Protein	MLSELAVILKAK	1	NH2-M<ox>LSELAVILK<ub>AK<ub>-COOH	584	QK	KY	Oxidation of M (1), Ubiquitination of K (12, 10)		Oxidation of M (1: 100.0), Ubiquitination of K (10: 100.0, 12: 100.0)	Oxidation of M (1: 43.040991420400374), Ubiquitination of K (10: 43.040991420400374, 12: 43.040991420400374)	1	3.76751	70.6383
368	Q8N6Y2	Single Protein	MRVVTIVILLCFCKAAELR	2	NH2-M<ox>RVVTIVILLC<cmm>FCK<ub>AAELR-COOH	1		KA	Carbamidomethylation of C (11), Oxidation of M (1), Ubiquitination of K (14)		Carbamidomethylation of C (11: 50.0, 13: 50.0), Oxidation of M (1: 100.0), Ubiquitination of K (14: 100.0)	Carbamidomethylation of C (11: 77.98471824259789), Oxidation of M (1: 77.98471824259789), Ubiquitination of K (14: 77.98471824259789)	1	4.26209	79.1489
648	Q96B26	Single Protein	LMDEVIKSMKPK	1	NH2-LM<ox>DEVIK<ub>SMK<ub>PK<ub>-COOH	265	KK		Oxidation of M (2), Ubiquitination of K (10, 12, 7)		Oxidation of M (2: 99.98153721167327, 9: 0.01846278832673352), Ubiquitination of K (7: 100.0, 10: 100.0, 12: 100.0)	Oxidation of M (2: 68.36832061068702), Ubiquitination of K (7: 68.36832061068702, 10: 68.36832061068702, 12: 68.36832061068702)	1	6.26419	90.1288
768	Q9NQS7	Single Protein	RNTPLRMDPK	2	NH2-RNTPLRM<ox>DPK<longub>-COOH	522	IK	CS	Long ubiquitination (10), Oxidation of M (7)		Long ubiquitination (10: 100.0), Oxidation of M (7: 100.0)	Long ubiquitination (10: 72.90969899665552), Oxidation of M (7: 72.90969899665552)	2	11.6914	94.9044
950	Q14204	Single Protein	EPPPGVKANMLR	1	NH2-EPPPGVK<ub>ANM<ox>LR-COOH	4148	VF	TF	Oxidation of M (10), Ubiquitination of K (7)		Oxidation of M (10: 100.0), Ubiquitination of K (7: 100.0)	Oxidation of M (10: 63.961813842482094), Ubiquitination of K (7: 63.961813842482094)	1	4.86076	82.5532
958	O95221	Single Protein	MLADLLSEK	0	NH2-M<ox>LADLLSEK<ub>-COOH	81	PK	KT	Oxidation of M (1), Ubiquitination of K (9)		Oxidation of M (1: 100.0), Ubiquitination of K (9: 100.0)	Oxidation of M (1: 41.145584725536985), Ubiquitination of K (9: 41.145584725536985)	1	4.29829	80.9339
1016	Q92826	Single Protein	MEPGNYATLDGAK	0	NH2-M<ox>EPGNYATLDGAK<ub>-COOH	1		DI	Oxidation of M (1), Ubiquitination of K (13)		Oxidation of M (1: 100.0), Ubiquitination of K (13: 100.0)	Oxidation of M (1: 75.81947743467934), Ubiquitination of K (13: 75.81947743467934)	1	11.5922	94.6058
1212	Q14159	Single Protein	QLEGKSCSLVGMK	1	pyro-QLEGK<ub>SCSLVGM<ox>K<ub>-COOH	541	AR	VL	Oxidation of M (12), Pyrolidone from Q (1), Ubiquitination of K (13, 5)		Oxidation of M (12: 100.0), Pyrolidone from Q (0: 100.0), Ubiquitination of K (5: 100.0, 13: 100.0)	Oxidation of M (12: 59.656652360515025), Pyrolidone from Q (1: 59.656652360515025), Ubiquitination of K (5: 59.656652360515025, 13: 59.656652360515025)	1	4.03449	77.1186
1224	A0A1B0GV03	Single Protein	QEKQMLKQK	2	pyro-QEK<ub>QM<ox>LK<ub>QK<ub>-COOH	344	RK	EQ	Oxidation of M (5), Pyrolidone from Q (1), Ubiquitination of K (9, 3, 7)		Oxidation of M (5: 100.0), Pyrolidone from Q (0: 100.0), Ubiquitination of K (3: 100.0, 7: 100.0, 9: 100.0)	Oxidation of M (5: 73.6766809728183), Pyrolidone from Q (1: 73.6766809728183), Ubiquitination of K (3: 73.6766809728183, 7: 73.6766809728183, 9: 73.6766809728183)	1	10.048	94.958
1379	Q03001	Single Protein	AREGLEKMVAEDNER	2	NH2-AREGLEK<ub>M<ox>VAEDNER-COOH	5794	WR	YR	Oxidation of M (8), Ubiquitination of K (7)		Oxidation of M (8: 100.0), Ubiquitination of K (7: 100.0)	Oxidation of M (8: 50.861244019138766), Ubiquitination of K (7: 50.861244019138766)	2	5.85903	87.2428
1696	A6QL63	Single Protein	FKQDLGFRMLNCGR	2	NH2-FK<ub>QDLGFRM<ox>LNCGR-COOH	568	AK	TD	Oxidation of M (9), Ubiquitination of K (2)		Oxidation of M (9: 100.0), Ubiquitination of K (2: 100.0)	Oxidation of M (9: 40.30710172744721), Ubiquitination of K (2: 40.30710172744721)	1	4.03958	78.481
1948	Q8N4T0	Single Protein	EALLTYKSDPAMR	1	pyro-EALLTYK<ub>SDPAM<ox>R-COOH	212	VK	KM	Oxidation of M (12), Pyrolidone from E (1), Ubiquitination of K (7)		Oxidation of M (12: 100.0), Pyrolidone from E (0: 100.0), Ubiquitination of K (7: 100.0)	Oxidation of M (12: 71.69900615238997), Pyrolidone from E (1: 71.69900615238997), Ubiquitination of K (7: 71.69900615238997)	1	8.59185	92.3404
2100	Q5VZL5	Single Protein	MLPSVPATAVRVSCSGCKK	2	NH2-M<ox>LPSVPATAVRVSCSGC<cmm>K<longub>K<longub>-COOH	328	NK	IL	Carbamidomethylation of C (17), Long ubiquitination (18, 19), Oxidation of M (1)		Carbamidomethylation of C (14: 50.0, 17: 50.0), Long ubiquitination (18: 100.0, 19: 100.0), Oxidation of M (1: 100.0)	Carbamidomethylation of C (17: 70.44917257683215), Long ubiquitination (18: 70.44917257683215, 19: 70.44917257683215), Oxidation of M (1: 70.44917257683215)	1	3.73318	68.7243
2102	Q92805	Single Protein	MLELRKTLQK	2	NH2-M<ox>LELRK<ub>TLQK<ub>-COOH	644	QR	EL	Oxidation of M (1), Ubiquitination of K (6, 10)		Oxidation of M (1: 100.0), Ubiquitination of K (6: 100.0, 10: 100.0)	Oxidation of M (1: 42.00956937799043), Ubiquitination of K (6: 42.00956937799043, 10: 42.00956937799043)	1	3.95707	76.6129
2740	O94808	Single Protein	QMPVIMVIMKD	1	NH2-QM<ox>PVIMVIMK<ub>D-COOH	587	DK	PC	Oxidation of M (2), Ubiquitination of K (10)		Oxidation of M (2: 99.99999998463642, 6: 7.681794994946636E-9, 9: 7.681794994946636E-9), Ubiquitination of K (10: 100.0)	Oxidation of M (2: 71.3326941514861), Ubiquitination of K (10: 71.3326941514861)	1	7.03518	93.1624
DB4h
AKT_04	Q16288	Related Proteins	WMPPESIMYRK	1	NH2-WM<ox>PPESIMYRK<ub>-COOH	736; 719	IR; IR	FT; FT	Oxidation of M (2), Ubiquitination of K (11)		Oxidation of M (2: 99.9999999999999, 8: 50.0), Ubiquitination of K (11: 100.0)	Oxidation of M (2: 44.44444444444444), Ubiquitination of K (11: 44.44444444444444)	25	53.3183	98.3193
AKT_04	P21817	Single Protein	EKEMITSLFCKLAALVR	2	pyro-EK<ub>EM<ox>ITSLFC<cmm>K<ub>LAALVR-COOH	3035	NK	HR	Carbamidomethylation of C (10), Oxidation of M (4), Pyrolidone from E (1), Ubiquitination of K (2, 11)		Carbamidomethylation of C (10: 100.0), Oxidation of M (4: 100.0), Pyrolidone from E (0: 100.0), Ubiquitination of K (2: 100.0, 11: 100.0)	Carbamidomethylation of C (10: 67.5), Oxidation of M (4: 67.5), Pyrolidone from E (1: 67.5), Ubiquitination of K (2: 67.5, 11: 67.5)	3	11.4239	80
AKT_04	Q9UQ80	Single Protein	ARMGVVECAK	1	NH2-ARM<ox>GVVEC<cmm>AK<ub>-COOH	289	KK	HE	Carbamidomethylation of C (8), Oxidation of M (3), Ubiquitination of K (10)		Carbamidomethylation of C (8: 100.0), Oxidation of M (3: 100.0), Ubiquitination of K (10: 100.0)	Carbamidomethylation of C (8: 96.72131147540983), Oxidation of M (3: 96.72131147540983), Ubiquitination of K (10: 96.72131147540983)	3	19.1987	95.8158
AKT_04	Q6ZMY6	Single Protein	WILSASKDRTMR	2	NH2-WILSASK<ub>DRTM<ox>R-COOH	377	KK	LW	Oxidation of M (11), Ubiquitination of K (7)		Oxidation of M (11: 100.0), Ubiquitination of K (7: 100.0)	Oxidation of M (11: 65.53191489361703), Ubiquitination of K (7: 65.53191489361703)	19	56.2481	98.3193
AKT_04	P21333	Single Protein	AYGPGIEPTGNMVK	0	NH2-AYGPGIEPTGNM<ox>VK<ub>-COOH	286	AR	KR	Oxidation of M (12), Ubiquitination of K (14)		Oxidation of M (12: 100.0), Ubiquitination of K (14: 100.0)	Oxidation of M (12: 92.51012145748987), Ubiquitination of K (14: 92.51012145748987)	1	11.9826	88
AKT_04	Q8NEN0	Single Protein	FISGNLGFLNEMISK	0	NH2-FISGNLGFLNEM<ox>ISK<ub>-COOH	403	IK	GA	Oxidation of M (12), Ubiquitination of K (15)		Oxidation of M (12: 100.0), Ubiquitination of K (15: 100.0)	Oxidation of M (12: 100.0), Ubiquitination of K (15: 100.0)	4	100	100
AKT_04	P04083	Single Protein	IMVSRSEIDMNDIK	1	NH2-IM<ox>VSRSEIDMNDIK<ub>-COOH	299	IR	AF	Oxidation of M (2), Ubiquitination of K (14)		Oxidation of M (2: 99.99999999988061, 10: 0.0391822399193954), Ubiquitination of K (14: 100.0)	Oxidation of M (2: 52.33968804159446), Ubiquitination of K (14: 52.33968804159446)	8	17.5283	95.8158
AKT_04	P18206	Single Protein	TCKMLGQMTDQVADLR	1	NH2-TCK<ubq long k>M<ox>LGQMTDQVADLR-COOH	324	LG	AR	Oxidation of M (4), Ubiquitination long of K (3)		Oxidation of M (4: 99.99999999934754, 8: 3.5813962827815437E-6), Ubiquitination long of K (3: 100.0)	Oxidation of M (4: 100.0), Ubiquitination long of K (3: 100.0)	2	100	100
AKT_04	Q86YA3	Single Protein	GALMNGVTEIERSPLLEWLPTLCFYNVK	1	NH2-GALM<ox>NGVTEIERSPLLEWLPTLCFYNVK<ub>-COOH	1894	YK	GL	Oxidation of M (4), Ubiquitination of K (28)		Oxidation of M (4: 100.0), Ubiquitination of K (28: 100.0)	Oxidation of M (4: 95.29652351738241), Ubiquitination of K (28: 95.29652351738241)	4	25.7965	95
AKT_04	Q9NZN1	Single Protein	LLYPMESK	0	NH2-LLYPM<ox>ESK<ub>-COOH	244	PK	LT	Oxidation of M (5), Ubiquitination of K (8)		Oxidation of M (5: 100.0), Ubiquitination of K (8: 100.0)	Oxidation of M (5: 94.97991967871486), Ubiquitination of K (8: 94.97991967871486)	5	39.0722	99.1597
149	Q9HBF4	Single Protein	KSMNHGKEGVPHEAK	2	NH2-K<longub>SM<ox>NHGK<ub>EGVPHEAK<longub>-COOH	442	CK	SR	Long ubiquitination (1, 15), Oxidation of M (3), Ubiquitination of K (7)		Long ubiquitination (1: 99.99995868454597, 7: 0.057133075078561364, 15: 99.94290824037549), Oxidation of M (3: 100.0), Ubiquitination of K (1: 3.130823586241873E-5, 7: 99.9502681512679, 15: 0.04970054049623354)	Long ubiquitination (1: 82.17537134643028, 15: 82.17537134643028), Oxidation of M (3: 82.17537134643028), Ubiquitination of K (7: 82.17537134643028)	1	5.42125	81.1448
256	Q9Y5K5	Single Protein	FNLMAIVSDRKMIYEQK	2	NH2-FNLM<ox>AIVSDRK<longub>MIYEQK-COOH	218	IR	IA	Long ubiquitination (11), Oxidation of M (4)		Long ubiquitination (11: 99.99996807265619, 17: 3.192734380839372E-5), Oxidation of M (4: 99.99999997786182, 12: 2.213818622440689E-8)	Long ubiquitination (11: 78.41399137517968), Oxidation of M (4: 87.49401054144705)	1	6.15911	86.9346
304	O60443	Single Protein	NEVLCVLTQKITTMQK	1	NH2-NEVLC<cmm>VLTQK<ub>ITTM<ox>QK-COOH	152	GR	CV	Carbamidomethylation of C (5), Oxidation of M (14), Ubiquitination of K (10)		Carbamidomethylation of C (5: 100.0), Oxidation of M (14: 100.0), Ubiquitination of K (10: 99.95358348627393, 16: 0.04641651372606594)	Carbamidomethylation of C (5: 74.70052707235266), Oxidation of M (14: 74.70052707235266), Ubiquitination of K (10: 64.20196523150894)	1	6.68301	86.8687
414	O75031	Single Protein	KEQELEQLKMDCEHFK	2	NH2-K<ub>EQELEQLK<longub>M<ox>DC<cmm>EHFK<longub>-COOH	67	ER	AR	Carbamidomethylation of C (12), Long ubiquitination (16, 9), Oxidation of M (10), Ubiquitination of K (1)		Carbamidomethylation of C (12: 100.0), Long ubiquitination (1: 7.291241089036823E-14, 9: 99.99999999999993, 16: 100.0), Oxidation of M (10: 100.0), Ubiquitination of K (1: 99.9999999999991, 9: 9.028401629059727E-13, 16: 2.708300326411215E-17)	Carbamidomethylation of C (12: 74.55678006708193), Long ubiquitination (9: 74.55678006708193, 16: 74.55678006708193), Oxidation of M (10: 74.55678006708193), Ubiquitination of K (1: 74.55678006708193)	1	3.48305	65.6566
447	Q9P0L0	Single Protein	QDGPMPKPHSVSLNDTETRKLMEECK	2	NH2-QDGPMPKPHSVSLNDTETRKLM<ox>EEC<cmm>K<ub>-COOH	155	SK	RL	Carbamidomethylation of C (25), Oxidation of M (22), Ubiquitination of K (26)		Carbamidomethylation of C (25: 100.0), Oxidation of M (5: 2.4530910359778682E-11, 22: 99.99999999997547), Ubiquitination of K (7: 7.021653872357147E-23, 20: 3.032250850410125E-8, 26: 99.99999996967749)	Carbamidomethylation of C (25: 95.59175850503114), Oxidation of M (22: 95.59175850503114), Ubiquitination of K (26: 23.50263536176329)	1	12.3436	97.3684
473	Q6ZXV5	Single Protein	HKLALFNSAIVMQESGEVKLRPEAR	2	NH2-HK<ub>LALFNSAIVM<ox>QESGEVK<ub>LRPEAR-COOH	631	PK	KR	Oxidation of M (12), Ubiquitination of K (2, 19)		Oxidation of M (12: 100.0), Ubiquitination of K (2: 100.0, 19: 100.0)	Oxidation of M (12: 98.22712026832774), Ubiquitination of K (2: 98.22712026832774, 19: 98.22712026832774)	1	14.4521	98.8304
486	H3BQB6	Single Protein	DFTMKDIEEKMEAAEER	2	NH2-DFTM<ox>K<ub>DIEEK<ub>M<ox>EAAEER-COOH	163	VK	RK	Oxidation of M (11, 4), Ubiquitination of K (10, 5)		Oxidation of M (4: 100.0, 11: 100.0), Ubiquitination of K (5: 100.0, 10: 100.0)	Oxidation of M (4: 75.61092477240058, 11: 75.61092477240058), Ubiquitination of K (5: 75.61092477240058, 10: 75.61092477240058)	1	3.57079	66
502	Q6ZT98	Single Protein	GPKPLCSMPESTEIMKRPK	1	NH2-GPK<ub>PLC<cmm>SMPESTEIM<ox>KRPK-COOH	527	TR	YC	Carbamidomethylation of C (6), Oxidation of M (15), Ubiquitination of K (3)		Carbamidomethylation of C (6: 100.0), Oxidation of M (8: 1.369577914838265E-5, 15: 99.99998630422085), Ubiquitination of K (3: 99.99999999999251, 16: 3.751019825881857E-12, 19: 3.751019825881857E-12)	Carbamidomethylation of C (6: 97.07714422616196), Oxidation of M (15: 83.89401862692898), Ubiquitination of K (3: 97.07714422616196)	1	12.3436	97.3684
525	Q9Y2P4	Single Protein	HQLVEDGFNPLKISEPLYFMDNLKK	2	NH2-HQLVEDGFNPLK<ub>ISEPLYFM<ox>DNLKK<ub>-COOH	575	LK	SY	Oxidation of M (20), Ubiquitination of K (12, 25)		Oxidation of M (20: 100.0), Ubiquitination of K (12: 99.88572098156149, 24: 0.2285580368770202, 25: 99.88572098156149)	Oxidation of M (20: 93.91471011020603), Ubiquitination of K (24: 78.60199031487899, 25: 78.60199031487899)	1	8.85907	89.5623
601	Q9NZN8	Single Protein	MVRTDGHTLSEK	1	NH2-M<ox>VRTDGHTLSEK<longub>-COOH	1		RN	Long ubiquitination (12), Oxidation of M (1)		Long ubiquitination (12: 100.0), Oxidation of M (1: 100.0)	Long ubiquitination (12: 71.58600862482032), Oxidation of M (1: 71.58600862482032)	1	5.48326	79.7297
689	Q9Y4Y9	Single Protein	CIGSRIHIVMKSDK	2	NH2-C<cmm>IGSRIHIVM<ox>KSDK<ub>-COOH	21	DK	EI	Carbamidomethylation of C (1), Oxidation of M (10), Ubiquitination of K (14)		Carbamidomethylation of C (1: 100.0), Oxidation of M (10: 100.0), Ubiquitination of K (11: 0.028051529602953543, 14: 99.98673887670044)	Carbamidomethylation of C (1: 39.72208912314327), Oxidation of M (10: 39.72208912314327)	2	3.72661	67.2241
691	Q8N326	Single Protein	HMPMGNNAGNLEPEKR	1	NH2-HMPM<ox>GNNAGNLEPEK<ub>R-COOH	24	VK	KA	Oxidation of M (4), Ubiquitination of K (15)		Oxidation of M (2: 1.7311795350122484E-5, 4: 99.99998268820465), Ubiquitination of K (15: 100.0)	Oxidation of M (4: 65.64446574029708), Ubiquitination of K (15: 65.64446574029708)	1	3.25189	64.628
760	Q9NU02	Single Protein	RQDGGPPYYMIETYKNVTDSSR	2	NH2-RQDGGPPYYM<ox>IETYK<ub>NVTDSSR-COOH	446	PR	FN	Oxidation of M (10), Ubiquitination of K (15)		Oxidation of M (10: 100.0), Ubiquitination of K (15: 100.0)	Oxidation of M (10: 96.4063248682319), Ubiquitination of K (15: 96.4063248682319)	1	12.0218	96.633
771	P78536	Single Protein	RADPDPMKNTCK	2	NH2-RADPDPM<ox>KNTC<cmm>K<longub>-COOH	215	KR	LL	Carbamidomethylation of C (11), Long ubiquitination (12), Oxidation of M (7)		Carbamidomethylation of C (11: 100.0), Long ubiquitination (8: 0.026117960991427273, 12: 99.97388203900857), Oxidation of M (7: 100.0)	Carbamidomethylation of C (11: 21.274556780067076), Long ubiquitination (12: 21.274556780067076), Oxidation of M (7: 21.274556780067076)	1	5.24763	79.798
901	Q03001	Single Protein	AREGLEKMVAEDNER	2	NH2-AREGLEK<ub>M<ox>VAEDNER-COOH	5794	WR	YR	Oxidation of M (8), Ubiquitination of K (7)		Oxidation of M (8: 100.0), Ubiquitination of K (7: 100.0)	Oxidation of M (8: 27.934834690943944), Ubiquitination of K (7: 27.934834690943944)	1	7.10399	87.9195
960	O95342	Single Protein	AYAKAGVVADEVISSMR	1	NH2-AYAK<ub>AGVVADEVISSM<ox>R-COOH	273	LK	TV	Oxidation of M (16), Ubiquitination of K (4)		Oxidation of M (16: 100.0), Ubiquitination of K (4: 100.0)	Oxidation of M (16: 66.45903210349783), Ubiquitination of K (4: 66.45903210349783)	1	4.42522	76.0943
1060	P06576	Single Protein	ILQDYKSLQDIIAILGMDELSEEDKLTVSR	2	NH2-ILQDYK<ub>SLQDIIAILGM<ox>DELSEEDKLTVSR-COOH	427	QK	AR	Oxidation of M (17), Ubiquitination of K (6)		Oxidation of M (17: 100.0), Ubiquitination of K (6: 100.0, 25: 2.5802457181332383E-43)	Oxidation of M (17: 99.906191369606), Ubiquitination of K (6: 99.906191369606)	1	100	100
1071	Q8NDP4	Single Protein	HMVVHSGDGPYKCK	1	NH2-HM<ox>VVHSGDGPYK<ub>C<cmm>K-COOH	204	QR	FC	Carbamidomethylation of C (13), Oxidation of M (2), Ubiquitination of K (12)		Carbamidomethylation of C (13: 100.0), Oxidation of M (2: 100.0), Ubiquitination of K (12: 50.0, 14: 50.0)	Carbamidomethylation of C (13: 11.499760421657879), Oxidation of M (2: 11.499760421657879)	1	3.07496	63.7584
1139	Q96J02	Single Protein	MRLLQFVTGTCRLPVGGFADLMGSNGPQK	2	NH2-M<ox>RLLQFVTGTC<cmm>RLPVGGFADLM<ox>GSNGPQK<ub>-COOH	825	KR	FC	Carbamidomethylation of C (11), Oxidation of M (1, 22), Ubiquitination of K (29)		Carbamidomethylation of C (11: 100.0), Oxidation of M (1: 100.0, 22: 100.0), Ubiquitination of K (29: 100.0)	Carbamidomethylation of C (11: 83.99616674652611), Oxidation of M (1: 83.99616674652611, 22: 83.99616674652611), Ubiquitination of K (29: 83.99616674652611)	1	5.70154	80.1347
1209	P28330	Single Protein	CIGAIAMTEPGAGSDLQGIKTNAK	1	NH2-C<cmm>IGAIAM<ox>TEPGAGSDLQGIKTNAK<ub>-COOH	166	GK	KD	Carbamidomethylation of C (1), Oxidation of M (7), Ubiquitination of K (24)		Carbamidomethylation of C (1: 100.0), Oxidation of M (7: 100.0), Ubiquitination of K (20: 0.051398440545376615, 24: 99.94860155945462)	Carbamidomethylation of C (1: 61.0924772400575), Oxidation of M (7: 61.0924772400575), Ubiquitination of K (24: 35.17010062290369)	1	4.03269	72.5166
1261	P78559	Single Protein	AGPMALSSKGSSGAPVYVDLAYIPNHCSGK	1	NH2-AGPM<ox>ALSSK<ub>GSSGAPVYVDLAYIPNHCSGK<ub>-COOH	2676	LK	TA	Oxidation of M (4), Ubiquitination of K (9, 30)		Oxidation of M (4: 100.0), Ubiquitination of K (9: 100.0, 30: 100.0)	Oxidation of M (4: 59.94250119789171), Ubiquitination of K (9: 59.94250119789171, 30: 59.94250119789171)	1	3.92676	69.3333
1415	O95714	Related Proteins	KETAPVQLPVSGPELAAMMKIGTR	2	NH2-K<ub>ETAPVQLPVSGPELAAM<ox>MK<ub>IGTR-COOH	1849; 577	TR; TR	VM; VM	Oxidation of M (18), Ubiquitination of K (20, 1)		Oxidation of M (18: 50.0, 19: 50.0), Ubiquitination of K (1: 100.0, 20: 100.0)	Ubiquitination of K (1: 79.6837565884044, 20: 79.6837565884044)	1	4.61814	78.1145
1426	Q9UNW8	Single Protein	GWKEWSMKTDVTR	2	NH2-GWK<longub>EWSM<ox>K<ub>TDVTR-COOH	325	HK	LT	Long ubiquitination (3), Oxidation of M (7), Ubiquitination of K (8)		Long ubiquitination (3: 99.99999693844123, 8: 3.0615587669009065E-6), Oxidation of M (7: 100.0), Ubiquitination of K (3: 0.01957560078152692, 8: 99.98042439921846)	Long ubiquitination (3: 10.44561571633924), Oxidation of M (7: 10.44561571633924), Ubiquitination of K (8: 10.44561571633924)	1	2.97396	60.9272
1472	P78382	Single Protein	DNVTLLFKLYCLAVMTLMAAVYTIALR	1	NH2-DNVTLLFK<ub>LYC<cmm>LAVM<ox>TLMAAVYTIALR-COOH	6	PR	YT	Carbamidomethylation of C (11), Oxidation of M (15), Ubiquitination of K (8)		Carbamidomethylation of C (11: 100.0), Oxidation of M (15: 99.88263428207496, 18: 0.11736571792504205), Ubiquitination of K (8: 100.0)	Carbamidomethylation of C (11: 75.32343076185913), Oxidation of M (18: 29.289405583852187), Ubiquitination of K (8: 75.32343076185913)	1	3.48305	65.6566
1535	Q9H9Q2	Single Protein	MKCIPYSVLLKDLEMR	2	NH2-M<ox>K<longub>CIPYSVLLK<ub>DLEMR-COOH	108	SR	NL	Long ubiquitination (2), Oxidation of M (1), Ubiquitination of K (11)		Long ubiquitination (2: 99.99999760638059, 11: 2.393619409682301E-6), Oxidation of M (1: 99.99999824172379, 15: 1.7582762099933002E-6), Ubiquitination of K (2: 1.955664897740064E-6, 11: 99.9999980443351)	Long ubiquitination (2: 59.0321034978438), Oxidation of M (1: 59.0321034978438), Ubiquitination of K (11: 59.0321034978438)	1	3.62364	65.8784
1621	Q14289	Single Protein	KMIQQTFQQYASLREEECVMK	2	NH2-K<ub>M<ox>IQQTFQQYASLREEEC<cmm>VM<ox>K-COOH	229	FR	FF	Carbamidomethylation of C (18), Oxidation of M (2, 20), Ubiquitination of K (1)		Carbamidomethylation of C (18: 100.0), Oxidation of M (2: 100.0, 20: 100.0), Ubiquitination of K (1: 99.99999995756599, 21: 4.243401435133434E-8)	Carbamidomethylation of C (18: 87.87733588883565), Oxidation of M (2: 87.87733588883565, 20: 87.87733588883565), Ubiquitination of K (1: 87.87733588883565)	1	6.15911	86.9346
1652	Q16566	Single Protein	MVPKAVEDGIKVADLELEEGLAEEK	2	NH2-M<ox>VPKAVEDGIK<longub>VADLELEEGLAEEK-COOH	416	PK	LK	Long ubiquitination (11), Oxidation of M (1), Ubiquitination of K (11)		Long ubiquitination (4: 5.542832172914586E-9, 11: 99.96900875323935, 25: 0.030991241217809436), Oxidation of M (1: 100.0), Ubiquitination of K (4: 4.726606305323109E-9, 11: 49.99999999763669, 25: 49.99999999763669)	Long ubiquitination (25: 52.634315888300556), Oxidation of M (1: 62.48203162434116), Ubiquitination of K (11: 52.634315888300556)	1	4.08664	72.4083
1663	O15146	Single Protein	LHPNPMYQRMPLLLNPKLLSLEYPR	2	NH2-LHPNPMYQRM<ox>PLLLNPK<longub>LLSLEYPR-COOH	548	DR	NN	Long ubiquitination (17), Oxidation of M (10)		Long ubiquitination (17: 100.0), Oxidation of M (6: 2.7202408539419137E-5, 10: 99.99997279759147)	Long ubiquitination (17: 74.7963584091998), Oxidation of M (10: 74.7963584091998)	1	3.39705	65.1007
1719	Q14807	Single Protein	ERMVLMKTVEEK	2	NH2-ERM<ox>VLM<ox>K<ub>TVEEK<ub>-COOH	467	KR	DL	Oxidation of M (3, 6), Ubiquitination of K (12, 7)		Oxidation of M (3: 100.0, 6: 100.0), Ubiquitination of K (7: 100.0, 12: 100.0)	Oxidation of M (3: 32.77431720172497, 6: 32.77431720172497), Ubiquitination of K (7: 32.77431720172497, 12: 32.77431720172497)	1	9.29419	91.2458
1733	P33992	Single Protein	SLKSDMMSHLVKIPGIIIAASAVR	2	NH2-SLKSDM<ox>M<ox>SHLVK<longub>IPGIIIAASAVR-COOH	139	IR	AK	Long ubiquitination (12), Oxidation of M (6, 7)		Long ubiquitination (3: 0.10138516459651835, 12: 99.955249549261), Oxidation of M (6: 100.0, 7: 100.0)	Oxidation of M (6: 84.57115476760902, 7: 84.57115476760902)	2	9.17158	91.001
1737	Q9P2U7	Related Proteins	YASILMGISNGVGTLSGMVCPIIVGAMTK	0	NH2-YASILM<ox>GISNGVGTLSGMVC<cmm>PIIVGAMTK<ub>-COOH	433; 441	PR; PR	HK; NK	Carbamidomethylation of C (20), Oxidation of M (6), Ubiquitination of K (29)		Carbamidomethylation of C (20: 100.0), Oxidation of M (6: 99.9999999999913, 18: 8.699655329816843E-12, 27: 2.5731103989399434E-27), Ubiquitination of K (29: 100.0)	Carbamidomethylation of C (20: 87.87733588883565), Oxidation of M (6: 87.87733588883565), Ubiquitination of K (29: 87.87733588883565)	1	6.32302	87.2483
1745	Q13464	Single Protein	IMKELDEEGNQRR	2	NH2-IM<ox>K<ub>ELDEEGNQRR-COOH	463	DK	NL	Oxidation of M (2), Ubiquitination of K (3)		Oxidation of M (2: 100.0), Ubiquitination of K (3: 100.0)	Oxidation of M (2: 33.732630570196456), Ubiquitination of K (3: 33.732630570196456)	1	10.3415	94.5946
1864	P11137	Single Protein	DKIEGVGAATSAELDMPFYEDK	1	NH2-DKIEGVGAATSAELDM<ox>PFYEDK<longub>-COOH	545	DK	SG	Long ubiquitination (22), Oxidation of M (16)		Long ubiquitination (2: 6.090774194700777E-9, 22: 99.99999999390923), Oxidation of M (16: 100.0)	Long ubiquitination (22: 73.55055103018687), Oxidation of M (16: 73.55055103018687)	1	3.97071	70.8054
1897	Q9ULW5	Single Protein	VLDVDGVKVKLQMWDTAGQER	2	NH2-VLDVDGVK<ub>VK<ub>LQM<ox>WDTAGQER-COOH	105	NK	FR	Oxidation of M (13), Ubiquitination of K (8, 10)		Oxidation of M (13: 100.0), Ubiquitination of K (8: 100.0, 10: 100.0)	Oxidation of M (13: 98.85002395783421), Ubiquitination of K (8: 98.85002395783421, 10: 98.85002395783421)	1	15.7015	98.6667
1999	Q9UI33	Single Protein	EVAGGCAAQSKDIIPLVMEMKR	2	NH2-EVAGGCAAQSK<longub>DIIPLVM<ox>EMK<ub>R-COOH	868	QK	GS	Long ubiquitination (11), Oxidation of M (18), Ubiquitination of K (21)		Long ubiquitination (11: 99.8880129016082, 21: 0.11198709839179667), Oxidation of M (18: 99.89164576077737, 20: 0.10835423922262849), Ubiquitination of K (11: 1.4697612259606806E-4, 21: 99.9998530238774)	Long ubiquitination (11: 86.10445615716338), Oxidation of M (18: 86.10445615716338), Ubiquitination of K (21: 86.10445615716338)	1	5.62975	80.9365
2149	Q9UBE8	Single Protein	KMPNVFQNLVSCKR	2	NH2-KM<ox>PNVFQNLVSCK<ub>R-COOH	168	LK	VF	Oxidation of M (2), Ubiquitination of K (13)		Oxidation of M (2: 100.0), Ubiquitination of K (1: 9.770080459084997E-10, 13: 99.99999999902299)	Oxidation of M (2: 28.36607570675611), Ubiquitination of K (13: 28.36607570675611)	1	7.40363	88.2549
2157	Q8WZ42	Single Protein	VLETGDRVKMK	2	NH2-VLETGDRVK<longub>M<ox>K-COOH	14361	DK	TL	Long ubiquitination (9), Oxidation of M (10)		Long ubiquitination (9: 99.98779147132127, 11: 0.012208528678729732), Oxidation of M (10: 100.0)	Long ubiquitination (11: 30.618112122664115), Oxidation of M (10: 55.15093435553426)	1	3.00161	61.5128
2166	Q8N4C6	Single Protein	TYKEHLNSMVVERQQLLQDLEDLR	2	NH2-TYK<ub>EHLNSM<ox>VVERQQLLQDLEDLR-COOH	900	EK	NV	Oxidation of M (9), Ubiquitination of K (3)		Oxidation of M (9: 100.0), Ubiquitination of K (3: 100.0)	Oxidation of M (9: 82.60661236224244), Ubiquitination of K (3: 82.60661236224244)	1	5.62975	80.9365
2269	Q8TBZ0	Single Protein	HGFCENLDDICHSIKQMKEELQK	2	NH2-HGFC<cmm>ENLDDICHSIKQM<ox>KEELQK<ub>-COOH	232	LK	SH	Carbamidomethylation of C (4), Oxidation of M (17), Ubiquitination of K (23)		Carbamidomethylation of C (4: 99.99999999999989, 11: 1.0308449030280129E-13), Oxidation of M (17: 100.0), Ubiquitination of K (15: 0.012045772722075722, 18: 0.012045772722075722, 23: 99.97590845455586)	Carbamidomethylation of C (4: 90.08145663632008), Oxidation of M (17: 90.08145663632008), Ubiquitination of K (18: 30.148556948208356)	1	7.25056	88.0795
2305	P61266	Single Protein	KFVEVMTEYNATQSK	1	NH2-K<ub>FVEVM<ox>TEYNATQSK<ub>-COOH	125	SR	YR	Oxidation of M (6), Ubiquitination of K (1, 15)		Oxidation of M (6: 100.0), Ubiquitination of K (1: 100.0, 15: 100.0)	Oxidation of M (6: 11.348781937017227), Ubiquitination of K (1: 11.348781937017227, 15: 11.348781937017227)	1	3.10173	63.9996
2370	Q9Y485	Single Protein	AAFYRKNDPLDAAIFYLAMK	2	NH2-AAFYRK<longub>NDPLDAAIFYLAM<ox>K<ub>-COOH	1628	AK	KK	Long ubiquitination (6), Oxidation of M (19), Ubiquitination of K (20)		Long ubiquitination (6: 100.0, 20: 5.606405028426128E-17), Oxidation of M (19: 100.0), Ubiquitination of K (6: 1.601645237299678E-13, 20: 99.99999999999984)	Long ubiquitination (6: 98.80210828941064), Oxidation of M (19: 98.80210828941064), Ubiquitination of K (20: 98.80210828941064)	1	9.82097	93.6909
2524	P53621	Single Protein	KMMKIAEIR	2	NH2-K<ub>M<ox>MK<ub>IAEIR-COOH	718	LR	KD	Oxidation of M (2), Ubiquitination of K (4, 1)		Oxidation of M (2: 50.0, 3: 50.0), Ubiquitination of K (1: 100.0, 4: 100.0)	Ubiquitination of K (1: 91.61475802587447, 4: 91.61475802587447)	1	100	100
2533	Q8NEZ3	Single Protein	GITGDNKEHDEACLAGVAQMSIR	1	NH2-GITGDNK<ub>EHDEAC<cmm>LAGVAQM<ox>SIR-COOH	801	EK	MG	Carbamidomethylation of C (13), Oxidation of M (20), Ubiquitination of K (7)		Carbamidomethylation of C (13: 100.0), Oxidation of M (20: 100.0), Ubiquitination of K (7: 100.0)	Carbamidomethylation of C (13: 63.00910397700048), Oxidation of M (20: 63.00910397700048), Ubiquitination of K (7: 63.00910397700048)	1	4.3094	75.7161
2561	P09012	Single Protein	KAVQGGGATPVVGAVQGPVPGMPPMTQAPR	1	NH2-K<ub>AVQGGGATPVVGAVQGPVPGM<ox>PPM<ox>TQAPR-COOH	123	TK	IM	Oxidation of M (25, 22), Ubiquitination of K (1)		Oxidation of M (22: 100.0, 25: 100.0), Ubiquitination of K (1: 100.0)	Oxidation of M (22: 73.1193100143747, 25: 73.1193100143747), Ubiquitination of K (1: 73.1193100143747)	1	3.10878	63.878
2590	Q9UDY8	Single Protein	VLEPEGSPSLCLLKLMGEK	1	NH2-VLEPEGSPSLC<cmm>LLK<ub>LM<ox>GEK-COOH	81	LK	GC	Carbamidomethylation of C (11), Oxidation of M (16), Ubiquitination of K (14)		Carbamidomethylation of C (11: 100.0), Oxidation of M (16: 100.0), Ubiquitination of K (14: 50.0, 19: 50.0)	Carbamidomethylation of C (11: 63.727839003354106), Oxidation of M (16: 63.727839003354106)	1	3.14285	64.6465
2644	O94805	Single Protein	KFSPWIGGSILASLGTFQQMWISK	1	NH2-K<ub>FSPWIGGSILASLGTFQQM<ox>WISK<ub>-COOH	387	ER	QE	Oxidation of M (20), Ubiquitination of K (24, 1)		Oxidation of M (20: 100.0), Ubiquitination of K (1: 100.0, 24: 100.0)	Oxidation of M (20: 88.26066123622425), Ubiquitination of K (1: 88.26066123622425, 24: 88.26066123622425)	1	6.49335	87.3786
2830	P17035	Related Proteins	DVMLENYRNLVSLDISSKCMMK	2	NH2-DVMLENYRNLVSLDISSK<longub>C<cmm>M<ox>MK-COOH	35; 35; 35; 35	YR; YR; YR; YR	TF; EF; EF; EF	Carbamidomethylation of C (19), Long ubiquitination (18), Oxidation of M (20), Ubiquitination of K (18)		Carbamidomethylation of C (19: 100.0), Long ubiquitination (18: 99.97737226753625, 22: 0.02262773246374262), Oxidation of M (3: 9.342022690928076E-20, 20: 99.97768292660182, 21: 0.022317073398178695), Ubiquitination of K (18: 50.0, 22: 50.0)	Carbamidomethylation of C (19: 75.27551509343556)	1	3.43983	66
2856	Q8TB69	Single Protein	KPQFLSAAPTEPCIPMNKYQHK	1	NH2-K<ub>PQFLSAAPTEPCIPM<ox>NKYQHK-COOH	127	QK	FL	Oxidation of M (16), Ubiquitination of K (1)		Oxidation of M (16: 100.0), Ubiquitination of K (1: 100.0, 18: 1.3741613814453314E-15, 22: 1.3741613814453314E-15)	Oxidation of M (16: 74.7963584091998), Ubiquitination of K (1: 74.7963584091998)	1	3.48305	65.6566
2891	Q8N0S6	Single Protein	TPGEVTQEEVDLFMDCLYSHFHRHFK	1	NH2-TPGEVTQEEVDLFM<ox>DC<cmm>LYSHFHRHFK<ub>-COOH	271	HK	IH	Carbamidomethylation of C (16), Oxidation of M (14), Ubiquitination of K (26)		Carbamidomethylation of C (16: 100.0), Oxidation of M (14: 100.0), Ubiquitination of K (26: 100.0)	Carbamidomethylation of C (16: 49.257307139434594), Oxidation of M (14: 49.257307139434594), Ubiquitination of K (26: 49.257307139434594)	3	4.60896	78.2244
3018	Q9BSI4	Single Protein	NLGSPTQVISKPESKEEHAIYTADLAMGTR	1	NH2-NLGSPTQVISK<longub>PESKEEHAIYTADLAM<ox>GTR-COOH	292	FR	AA	Long ubiquitination (11), Oxidation of M (27)		Long ubiquitination (11: 50.0, 15: 50.0), Oxidation of M (27: 100.0)	Oxidation of M (27: 73.59846669861044)	1	3.27116	64.8026
3238	A6NDI0	Related Proteins	AEYQKMPAFHHEEEKHNLEMLK	2	NH2-AEYQK<longub>MPAFHHEEEKHNLEM<ox>LK-COOH	181; 181; 181; 181	IR; IR; IR; IR	KK; KK; KK; KK	Long ubiquitination (5), Oxidation of M (20)		Long ubiquitination (5: 99.99997086200139, 15: 2.913799861273198E-5, 22: 1.0255874780495789E-16), Oxidation of M (6: 1.7752138659929696E-8, 20: 99.99999998224787)	Long ubiquitination (5: 73.55055103018687), Oxidation of M (20: 73.55055103018687)	1	3.10878	63.878
3322	P06396	Single Protein	VVQGKEPAHLMSLFGGKPMIIYKGGTSR	2	NH2-VVQGKEPAHLM<ox>SLFGGK<longub>PMIIYKGGTSR-COOH	526	SR	EG	Long ubiquitination (17), Oxidation of M (11)		Long ubiquitination (5: 4.7774551020597904E-5, 17: 99.99995218385244, 23: 4.159654277348004E-8), Oxidation of M (11: 99.99999996678376, 19: 3.3216239755190354E-8)	Long ubiquitination (17: 99.04168663152852), Oxidation of M (11: 99.04168663152852)	1	17.4624	98.3553
3333	Q969F0	Single Protein	VWNMTATRPKKMGSQLPKPR	2	NH2-VWNM<ox>TATRPKKMGSQLPK<longub>PR-COOH	67	KR	ML	Long ubiquitination (18), Oxidation of M (4)		Long ubiquitination (10: 33.333333333333336, 11: 33.333333333333336, 18: 33.333333333333336), Oxidation of M (4: 99.99999773232457, 12: 2.2676754302907215E-6)	Long ubiquitination (18: 3.7907242983891978), Oxidation of M (12: 72.58407575548391)	1	5.03207	79.538
3371	Q9P2J8	Single Protein	IICKEMKGSK	2	NH2-IICK<ub>EM<ox>KGSK<ub>-COOH	246	GK	AI	Oxidation of M (6), Ubiquitination of K (10, 4)		Oxidation of M (6: 100.0), Ubiquitination of K (4: 50.00000011551907, 7: 50.00000011551907, 10: 99.99999976896189)	Oxidation of M (6: 39.626257786296115), Ubiquitination of K (4: 25.272081060631457, 10: 39.626257786296115)	1	11.7246	96.7638
3578	Q04637	Single Protein	CLMALKVPTTEKPTVTVNFR	1	NH2-CLM<ox>ALK<longub>VPTTEKPTVTVNFR-COOH	821	CR	KL	Long ubiquitination (6), Oxidation of M (3)		Long ubiquitination (6: 99.99990513751453, 12: 9.486248546404539E-5), Oxidation of M (3: 100.0)	Long ubiquitination (12: 0.6229036895064682), Oxidation of M (3: 92.76473406804024)	1	7.80103	88.5522
3641	O75818	Single Protein	KIMKFIVSIDLMELSLNLDSK	2	NH2-K<ub>IM<ox>K<ub>FIVSIDLMELSLNLDSK-COOH	140	GR	KY	Oxidation of M (3), Ubiquitination of K (4, 1)		Oxidation of M (3: 99.93440043500156, 12: 0.06559956499842985), Ubiquitination of K (1: 99.99999999999993, 4: 99.99999999999993, 21: 1.1219395551007081E-13)	Oxidation of M (3: 63.027181460725004), Ubiquitination of K (1: 87.58984187829421, 4: 87.58984187829421)	1	6.15911	86.9346
3706	Q9NS87	Single Protein	ENETLKSDLNNLMELLEAEKER	2	NH2-ENETLK<ub>SDLNNLM<ox>ELLEAEK<longub>ER-COOH	891	KK	NN	Long ubiquitination (20), Oxidation of M (13), Ubiquitination of K (6)		Long ubiquitination (6: 5.176963747746423E-4, 20: 99.99948230362523), Oxidation of M (13: 100.0), Ubiquitination of K (6: 99.99952369320097, 20: 4.7630679903765827E-4)	Long ubiquitination (6: 77.57546717776714), Oxidation of M (13: 77.57546717776714), Ubiquitination of K (20: 77.57546717776714)	1	3.94062	69.3333
3732	O75155	Single Protein	KCPKEMGPHVPNVTSLCLQYIK	2	NH2-K<ub>C<cmm>PKEM<ox>GPHVPNVTSLC<cmm>LQYIK-COOH	288	LR	HD	Carbamidomethylation of C (17, 2), Oxidation of M (6), Ubiquitination of K (1)		Carbamidomethylation of C (2: 100.0, 17: 100.0), Oxidation of M (6: 100.0), Ubiquitination of K (1: 49.99988320687863, 4: 49.99988320687863, 22: 2.3358624273689792E-4)	Carbamidomethylation of C (2: 94.01054144705319, 17: 94.01054144705319), Oxidation of M (6: 94.01054144705319)	1	8.85907	89.5623
3765	B3KU38	Related Proteins	SPVADLLPHMPHISECLMKRSLKPTDLR	2	NH2-SPVADLLPHMPHISEC<cmm>LM<ox>K<ub>RSLKPTDLR-COOH	469; 393	KK; KK	DM; DM	Carbamidomethylation of C (16), Oxidation of M (18), Ubiquitination of K (19)		Carbamidomethylation of C (16: 100.0), Oxidation of M (10: 1.9758725841404983E-6, 18: 100.0), Ubiquitination of K (19: 99.99363487018171, 23: 0.013391434521102787)	Carbamidomethylation of C (16: 85.48155246765691), Oxidation of M (18: 38.44406615210537)	2	8.68724	89.5238
3774	Q15648	Single Protein	SGGHLMNLKYYVSPSDLLDDK	1	NH2-SGGHLM<ox>NLKYYVSPSDLLDDK<ub>-COOH	215	PR	TA	Long ubiquitination (21), Oxidation of M (6), Ubiquitination of K (21)		Long ubiquitination (9: 0.010666857124463292, 21: 99.98933314287554), Oxidation of M (6: 100.0), Ubiquitination of K (9: 0.009548191557317235, 21: 99.99045180844269)	Long ubiquitination (21: 88.69190225203641), Oxidation of M (6: 88.69190225203641), Ubiquitination of K (9: 88.69190225203641)	1	6.40735	87.4172
3794	Q9UBN4	Single Protein	RHWAVKMVTCFIIGLLFPVFSVCYLIAPK	2	NH2-RHWAVK<longub>M<ox>VTCFIIGLLFPVFSVC<cmm>YLIAPK-COOH	324	RR	SP	Carbamidomethylation of C (23), Long ubiquitination (6), Oxidation of M (7)		Carbamidomethylation of C (10: 0.12948065909722978, 23: 99.87051934090276), Long ubiquitination (6: 99.8683118489181, 29: 0.13168815108190512), Oxidation of M (7: 100.0)	Carbamidomethylation of C (23: 77.2400574988021), Long ubiquitination (6: 77.2400574988021), Oxidation of M (7: 77.2400574988021)	1	4.03822	72.4249
3851	P06133	Single Protein	WAELPKDTFWSYFSQVQEIMWTFNDILR	1	NH2-WAELPK<longub>DTFWSYFSQVQEIM<ox>WTFNDILR-COOH	97	KR	KF	Long ubiquitination (6), Oxidation of M (20)		Long ubiquitination (6: 100.0), Oxidation of M (20: 100.0)	Long ubiquitination (6: 73.64638236703402), Oxidation of M (20: 73.64638236703402)	1	3.35468	65.6766
3861	A8MYV0	Single Protein	LFTMNGHLLGDSKDLQDNHFYVAVGLETFK	1	NH2-LFTM<ox>NGHLLGDSK<longub>DLQDNHFYVAVGLETFK-COOH	183	RK	YF	Long ubiquitination (13), Oxidation of M (4)		Long ubiquitination (13: 99.99986283358348, 30: 1.3716641652921797E-4), Oxidation of M (4: 100.0)	Long ubiquitination (13: 34.860830939464094), Oxidation of M (4: 80.30666027791088)	1	4.97047	79.2929
3887	Q9H2C8	Single Protein	LFQTCISHICAVLVFYIPIISLTMVHRFGK	1	NH2-LFQTC<cmm>ISHIC<cmm>AVLVFYIPIISLTM<ox>VHRFGK<longub>-COOH	246	HK	HL	Carbamidomethylation of C (10, 5), Long ubiquitination (30), Oxidation of M (24)		Carbamidomethylation of C (5: 100.0, 10: 100.0), Long ubiquitination (30: 100.0), Oxidation of M (24: 100.0)	Carbamidomethylation of C (5: 76.9046478198371, 10: 76.9046478198371), Long ubiquitination (30: 76.9046478198371), Oxidation of M (24: 76.9046478198371)	1	4.03822	72.4249
3921	Q96AA8	Single Protein	LMDEIKAKDR	2	NH2-LM<ox>DEIK<longub>AK<ub>DR-COOH	209	RR	II	Long ubiquitination (6), Oxidation of M (2), Ubiquitination of K (8)		Long ubiquitination (6: 50.0, 8: 50.0), Oxidation of M (2: 100.0), Ubiquitination of K (6: 50.0, 8: 50.0)	Long ubiquitination (6: 6.935823177907141), Oxidation of M (2: 16.003833253473886), Ubiquitination of K (8: 6.935823177907141)	1	3.43153	65.6566
3974	Q5T5Y3	Single Protein	DANILSEQMSLK	0	NH2-DANILSEQM<ox>SLK<ub>-COOH	1187	SK	EV	Oxidation of M (9), Ubiquitination of K (12)		Oxidation of M (9: 100.0), Ubiquitination of K (12: 100.0)	Oxidation of M (9: 23.23909918543363), Ubiquitination of K (12: 23.23909918543363)	1	5.85461	85.2843
3986	Q8WTR4	Single Protein	GAPMLAPEHTLMSFRKALEQK	2	NH2-GAPMLAPEHTLM<ox>SFRK<longub>ALEQK<longub>-COOH	235	HR	LY	Long ubiquitination (16, 21), Oxidation of M (12)		Long ubiquitination (16: 100.0, 21: 100.0), Oxidation of M (4: 0.21069760024119752, 12: 99.78930239975881)	Long ubiquitination (16: 80.97747963584092, 21: 80.97747963584092), Oxidation of M (12: 80.97747963584092)	1	5.15796	79.5987
4049	Q15057	Single Protein	LCIAMIDTGKAFCVANKQFMNGIR	2	NH2-LC<cmm>IAM<ox>IDTGKAFC<cmm>VANK<longub>QFMNGIR-COOH	41	VK	DL	Carbamidomethylation of C (2, 13), Long ubiquitination (17), Oxidation of M (5)		Carbamidomethylation of C (2: 100.0, 13: 100.0), Long ubiquitination (10: 1.4902885410157005E-5, 17: 99.99998509711459), Oxidation of M (5: 99.95485303003319, 20: 0.04514696996681474)	Carbamidomethylation of C (2: 86.77527551509343, 13: 86.77527551509343), Long ubiquitination (10: 23.496272638775125), Oxidation of M (5: 77.3463327455417)	1	5.70154	80.1347
4061	A8MZH6	Single Protein	SEMPLSCVVHKQKCQ	2	NH2-SEM<ox>PLSC<cmm>VVHK<ub>QK<ub>CQ-COOH	109	VR		Carbamidomethylation of C (7), Oxidation of M (3), Ubiquitination of K (11, 13)		Carbamidomethylation of C (7: 99.99999999999825, 14: 3.803697611458036E-8), Oxidation of M (3: 100.0), Ubiquitination of K (11: 100.0, 13: 100.0)	Carbamidomethylation of C (7: 10.250737463126846), Oxidation of M (3: 10.250737463126846), Ubiquitination of K (11: 10.250737463126846, 13: 10.250737463126846)	2	4.88959	79.0354
4083	P29622	Single Protein	FLNDTMAVYEAK	0	NH2-FLNDTM<ox>AVYEAK<longub>-COOH	155	AK	LF	Long ubiquitination (12), Oxidation of M (6)		Long ubiquitination (12: 100.0), Oxidation of M (6: 100.0)	Long ubiquitination (12: 87.11068519405846), Oxidation of M (6: 87.11068519405846)	1	20.7555	99.093
4088	P25054	Single Protein	QMSQQNLTKQTGLSKNASSIPR	2	NH2-QM<ox>SQQNLTK<ub>QTGLSK<ub>NASSIPR-COOH	2372	GR	SE	Oxidation of M (2), Ubiquitination of K (9, 15)		Oxidation of M (2: 100.0), Ubiquitination of K (9: 100.0, 15: 100.0)	Oxidation of M (2: 75.99425011978917), Ubiquitination of K (9: 75.99425011978917, 15: 75.99425011978917)	1	3.61533	66.1042
2883	Q9NTJ3	Single Protein	RIAEMETQKEK	2	NH2-RIAEM<ox>ETQK<longub>EK-COOH	333	QK	IH	Long ubiquitination (9), Oxidation of M (5)		Long ubiquitination (9: 50.0, 11: 50.0), Oxidation of M (5: 100.0)	Oxidation of M (5: 10.253953042644948)	1	3.0103	61.4094
31	Q15784	Single Protein	MLTRLFSEPGLLSDVPK	1	NH2-M<ox>LTRLFSEPGLLSDVPK<ub>-COOH	1		FA	Oxidation of M (1), Ubiquitination of K (17)		Oxidation of M (1: 100.0), Ubiquitination of K (17: 100.0)	Oxidation of M (1: 66.2075750122971), Ubiquitination of K (17: 66.2075750122971)	1	4.45713	79.304
298	Q9BXM0	Single Protein	VPEMAVPEVRLPEVQLLK	1	NH2-VPEM<ox>AVPEVRLPEVQLLK<ub>-COOH	507	PK	VS	Oxidation of M (4), Ubiquitination of K (18)		Oxidation of M (4: 100.0), Ubiquitination of K (18: 100.0)	Oxidation of M (4: 58.04878048780488), Ubiquitination of K (18: 58.04878048780488)	2	4.46386	79.652
360	Q8TCN5	Single Protein	FLMNTEMEEGK	0	NH2-FLMNTEM<ox>EEGK<ub>-COOH	414	KR	DL	Oxidation of M (7), Ubiquitination of K (11)		Oxidation of M (3: 50.0, 7: 50.0), Ubiquitination of K (11: 100.0)	Oxidation of M (7: 49.2405683488486), Ubiquitination of K (11: 49.2405683488486)	1	4.25969	78.3486
382	Q15751	Single Protein	ATMIPPVKLK	1	NH2-ATM<ox>IPPVK<ub>LK<ub>-COOH	2	M	WL	Oxidation of M (3), Ubiquitination of K (8, 10)		Oxidation of M (3: 100.0), Ubiquitination of K (8: 100.0, 10: 100.0)	Oxidation of M (3: 83.29286061194755), Ubiquitination of K (8: 83.29286061194755, 10: 83.29286061194755)	1	11.8833	96.1538
624	O60256	Single Protein	IMVYACKTSCAK	1	NH2-IM<ox>VYACK<ub>TSCAK<ub>-COOH	91	LL	SI	Oxidation of M (2), Ubiquitination of K (12, 7)		Oxidation of M (2: 100.0), Ubiquitination of K (7: 100.0, 12: 100.0)	Oxidation of M (2: 50.96993210475267), Ubiquitination of K (7: 50.96993210475267, 12: 50.96993210475267)	1	4.38558	79.1513
714	Q15021	Single Protein	MLPLIWSK	0	NH2-M<ox>LPLIWSK<ub>-COOH	678	RR	EP	Oxidation of M (1), Ubiquitination of K (8)		Oxidation of M (1: 100.0), Ubiquitination of K (8: 100.0)	Oxidation of M (1: 62.59842519685039), Ubiquitination of K (8: 62.59842519685039)	1	4.35729	78.6106
770	Q32M45	Single Protein	EVFERNIRAEGLQMEK	2	pyro-EVFERNIRAEGLQM<ox>EK<ub>-COOH	136	KR	ES	Oxidation of M (14), Pyrolidone from E (1), Ubiquitination of K (16)		Oxidation of M (14: 100.0), Pyrolidone from E (0: 100.0), Ubiquitination of K (16: 100.0)	Oxidation of M (14: 71.42154451549433), Pyrolidone from E (1: 71.42154451549433), Ubiquitination of K (16: 71.42154451549433)	1	6.76694	85.3261
824	Q9NQS7	Single Protein	RNTPLRMDPK	2	NH2-RNTPLRM<ox>DPK<longub>-COOH	522	IK	CS	Long ubiquitination (10), Oxidation of M (7)		Long ubiquitination (10: 100.0), Oxidation of M (7: 100.0)	Long ubiquitination (10: 72.412109375), Oxidation of M (7: 72.412109375)	1	7.3828	87.4307
869	Q2TAY7	Single Protein	LMALLGQALK	0	NH2-LM<ox>ALLGQALK<ub>-COOH	161	SR	WQ	Oxidation of M (2), Ubiquitination of K (10)		Oxidation of M (2: 100.0), Ubiquitination of K (10: 100.0)	Oxidation of M (2: 83.00395256916995), Ubiquitination of K (10: 83.00395256916995)	1	10.7188	95.2206
1150	P09238	Single Protein	SVPSGSEMPAK	0	NH2-SVPSGSEM<ox>PAK<ub>-COOH	278	TK	CD	Oxidation of M (8), Ubiquitination of K (11)		Oxidation of M (8: 100.0), Ubiquitination of K (11: 100.0)	Oxidation of M (8: 46.91478942213516), Ubiquitination of K (11: 46.91478942213516)	1	4.11245	73.227
1493	P46019	Single Protein	LMRGLLQCMMRQVAK	2	NH2-LM<ox>RGLLQCMM<ox>RQVAK<ub>-COOH	84	VK	VE	Oxidation of M (2, 10), Ubiquitination of K (15)		Oxidation of M (2: 99.9999983073707, 9: 50.00000084631465, 10: 50.00000084631465), Ubiquitination of K (15: 100.0)	Oxidation of M (2: 61.18226600985221, 10: 61.18226600985221), Ubiquitination of K (15: 61.18226600985221)	1	4.77121	81.5412
2265	Q12967	Single Protein	HGASSTLPRMKQK	2	NH2-HGASSTLPRM<ox>K<ub>QK<ub>-COOH	893	VK	GL	Oxidation of M (10), Ubiquitination of K (13, 11)		Oxidation of M (10: 100.0), Ubiquitination of K (11: 100.0, 13: 100.0)	Oxidation of M (10: 76.48794884407279), Ubiquitination of K (11: 76.48794884407279, 13: 76.48794884407279)	1	7.34084	87.0438
2297	Q01813	Single Protein	MKTTIQRGL	2	NH2-M<ox>K<ub>TTIQRGL-COOH	626	EK	VL	Oxidation of M (1), Ubiquitination of K (2)		Oxidation of M (1: 100.0), Ubiquitination of K (2: 100.0)	Oxidation of M (1: 73.14453125), Ubiquitination of K (2: 73.14453125)	1	9.23483	91.8033
2406	Q32M45	Single Protein	EVFERNIRAEGLQMEK	2	NH2-EVFERNIRAEGLQM<ox>EK<ub>-COOH	136	KR	ES	Oxidation of M (14), Ubiquitination of K (16)		Oxidation of M (14: 100.0), Ubiquitination of K (16: 100.0)	Oxidation of M (14: 61.18226600985221), Ubiquitination of K (16: 61.18226600985221)	1	4.77121	81.5412
2969	P33993	Single Protein	KQPMVPESLADYITAAYVEMR	1	NH2-K<ub>QPM<ox>VPESLADYITAAYVEMR-COOH	569	RE	RE	Oxidation of M (4), Ubiquitination of K (1)		Oxidation of M (4: 100.0, 20: 1.9565923170033355E-22), Ubiquitination of K (1: 100.0)	Oxidation of M (4: 98.91838741396263), Ubiquitination of K (1: 98.91838741396263)	1	15.9502	98.5267
3100	Q9HCN3	Single Protein	LRLNTGMDSGGSLTISLRANK	2	NH2-LRLNTGM<ox>DSGGSLTISLRANK<ub>-COOH	388	MR	TE	Oxidation of M (7), Ubiquitination of K (21)		Oxidation of M (7: 100.0), Ubiquitination of K (21: 100.0)	Oxidation of M (7: 72.412109375), Ubiquitination of K (21: 72.412109375)	1	6.9897	85.9078

## Sheet: S2(2)
Table S2(2). Ub-proteins related with structure and functions of mitochondria
Table S2(2a). Control
control	Recommended Protein Name	Gene	UniProt ID	Molecular function, Biological process, GO annotation
1.	Stress-70 protein, mitochondrial	HSPA9	P38646	Chaperone protein
2.	ATP synthase subunit beta, mitochondrial	ATP5F1B	P06576	ATP biosynthetic process
3.	Succinate dehydrogenase [ubiquinone] flavoprotein subunit, mitochondrial	SDHA	P31040	transferring electrons from succinate to ubiquinone Oxidoreductase
4.	Amine oxidase [flavin-containing] B	MAOB	P27338	oxidative deamination of biogenic and xenobiotic amines. Oxidoreductase, mitochondrial
5.	Sorbitol dehydrogenase	SORD	Q00796	response to drug, Cu, Cd, response to osmotic stress Oxidoreductase, mitochondrial
6.	1,25-dihydroxyvitamin D(3) 24-hydroxylase, mitochondrial	CYP24A1	Q07973	maintaining calcium homeostasis
				Oxidoreductase
7.	Solute carrier family 25 member 36	SLC25A36	Q96CQ1	Mitochondrial transporter that imports/exports pyrimidine nucleotides into and from mitochondria.
8.	Trichoplein keratin filament-binding protein	TCHP	Q9BT92	Mitochondrion. Cytoplasm and Cytosol
9.	Caprin-2	CAPRIN2	Q6IMN6	Mitochondrion. Cytoplasm and Cytosol
10.	Solute carrier family 25 member 46	SLC25A46	Q96AG3	May play a role in mitochondrial dynamics by controlling mitochondrial membrane fission.
11.	Copper-transporting ATPase 2	ATP7B	P35670	Mitochondrion. Cytoplasm and Cytosol
12.	Alpha-aminoadipic semialdehyde dehydrogenase	ALDH7A1	P49419	protective effects. Mitochondrion. Cytoplasm and Cytosol. Nucleus Oxidoreductase
13.	Succinate dehydrogenase [ubiquinone] flavoprotein subunit, mitochondrial	SDHA	P31040	Flavoprotein (FP) subunit of succinate dehydrogenase (SDH) that is involved in complex II of the mitochondrial electron transport chain Oxidoreductase
14.	Vacuolar protein sorting-associated protein 13C	VPS13C	Q709C8	Mitochondrion outer membrane. Necessary for proper mitochondrial function and maintenance of mitochondrial transmembrane potential
15.	Solute carrier family 25 member 46	SLC25A46	Q96AG3	May play a role in mitochondrial dynamics by controlling mitochondrial membrane fission.
16.	Tyrosine-protein kinase ABL1	ABL1	P00519	Nucleus, mitochondrion
17.	Glycerol kinase 2	GK2	Q14410	Mitochondrion outer membrane
Table S2(2b). DB1h
DB1h	Recommended Protein Name	Gene	UniProt ID	Molecular function, Biological process, GO annotation
1.	Stress-70 protein, mitochondrial	HSPA9	P38646	Chaperone protein
2.	39S ribosomal protein L39, mitochondrial	MRPL39	Q9NYK5	mitochondrial translational elongation
3.	Long-chain-fatty-acid--CoA ligase 4	ACSL4	O60488	both synthesis of cellular lipids, and degradation via beta-oxidation
4.	Myosin-14 (Myosin heavy chain 14)	MYH14	Q7Z406	mitochondrion morphogenesis
5.	2'-5'-oligoadenylate synthase 1	OAS1	P00973	apoptosis, cell growth, differentiation and gene regulation
6.	3-hydroxyisobutyrate dehydrogenase, mitochondrial	HIBADH	P31937	Oxidoreductase
7.	Leucine-rich PPR motif-containing protein, mitochondrial	LRPPRC	P42704	beta-tubulin binding, microtubule binding, RNA binding, single-stranded DNA binding,ubiquitin protein ligase binding
8.	39S ribosomal protein L1, mitochondrial	MRPL1	Q9BYD6	mitochondrial translational elongation termination
9.	GRAM domain-containing protein 4	GRAMD4	Q6IC98	apoptotic process, positive regulation of cysteine-type endopeptidase activity involved in apoptotic process
10.	39S ribosomal protein L15, mitochondrial	MRPL15	Q9P015	cellular response to leukemia inhibitory factor, mitochondrial translation
11.	NAD(P) transhydrogenase, mitochondrial	NNT	Q13423	NADPH regeneration, cell redox homeostasis Oxidoreductase
12.	Serine/threonine-protein phosphatase PGAM5, mitochondrial	PGAM5	Q96HS1	macroautophagy, necroptotic process. May be regulator of mitochondrial dynamics. Substrate for a KEAP1-dependent ubiquitin ligase complex
13.	Serine/threonine-protein phosphatase PP1-gamma catalytic subunit	PPP1CC	P36873	Mitochondrion, etc.
14.	Phosphatidylinositol 4-kinase beta	PI4KB	Q9UBF8	Mitochondrion outer membrane
Table S2(2c). D4h
Table S2(2c). D4h	Recommended Protein Name	Gene	UniProt ID	Molecular function, Biological process, GO annotation
1.	Cytochrome c oxidase subunit 6B2	COX6B2	Q6YFQ2	Connects the two COX monomers into the physiological dimeric form
2.	Valacyclovir hydrolase	BPHL	Q86WA6	May play a role in detoxification processes
3.	Vacuolar protein sorting-associated protein 13C	VPS13C	Q709C8	Necessary for proper mitochondrial function and maintenance of mitochondrial transmembrane potential. Involved in the regulation of PINK1/PRKN-mediated mitophagy in response to mitochondrial depolarization
4.	Metaxin-1	MTX1	Q13505	transport of proteins into the mitochondrio
5.	ATPase family AAA domain-containing protein 3A	ATAD3A	Q9NVI7	Mitochondrion inner membrane, Mitochondrion nucleoid
6.	ATP-dependent RNA helicase DHX30	DHX30	Q7L2E3	Plays an important role in the assembly of the mitochondrial large ribosomal subuni
7.	Caspase activity and apoptosis inhibitor 1	CAAP1	Q9H8G2	Anti-apoptotic protein that modulates a caspase-10 dependent mitochondrial caspase-3/9 feedback amplification loop
8.	Glycine dehydrogenase (decarboxylating), mitochondrial	GLDC	P23378	degradation of glycine. Oxidoreductase
9.	39S ribosomal protein L39, mitochondrial	MRPL39	Q9NYK5	mitochondrial translational elongation
10.	Threonine--tRNA ligase, mitochondrial	TARS2	Q9BW92	mitochondrial threonyl-tRNA aminoacylation
11.	Mitofusin-1	MFN1	Q8IWA4	Mitochondrial outer membrane GTPase that mediates mitochondrial clustering and fusion
12.	Hexokinase-1	HK1	P19367	glycolytic process, mannokinase activity, maintenance of protein location in mitochondrion (Mitochondrion outer membrane)
Table S2(2d). DB4h
DB4h	Recommended Protein Name	Gene	UniProt ID	Molecular function, Biological process, GO annotation
1.	Ornithine aminotransferase, mitochondrial	OAT	P04181	Mitochondrion matrix. Amino-acid biosynthesis.
2.	2'-5'-oligoadenylate synthase 1	OAS1	P00973	role in apoptosis, cell growth, differentiation and gene regulation. Mitochondrion. Cytoplasm and Cytosol. Nucleus. ER.
3.	39S ribosomal protein L16, mitochondrial	MRPL16	Q9NX20	mitochondrial translation
4.	Mitochondrial ubiquitin ligase activator of NFKB 1	MUL1	Q969V5	regulation of mitochondrial membrane potential, regulation of mitochondrial outer membrane permeabilization involved in apoptotic signaling pathway, mitochondrial fission
5.	Ornithine carbamoyltransferase, mitochondria	OTC	P00480	part of the pathway urea cycle
6.	Pyruvate dehydrogenase E1 component subunit beta, mitochondrial	PDHB	P11177	links the glycolytic pathway to the tricarboxylic cycle. Oxidoreductase
7.	Methylmalonate-semialdehyde dehydrogenase [acylating], mitochondrial	ALDH6A1	Q02252	role in valine and pyrimidine metabolism. Binds fatty acyl-CoA
8.	Uncharacterized protein C10orf67, mitochondria	C10orf67	Q8IYJ2	ND
9.	Long-chain specific acyl-CoA dehydrogenase, mitochondrial	ACADL	P28330	mitochondrial fatty acid beta-oxidation, cellular lipid catabolic process. Oxidoreductase
10.	ATP synthase subunit beta, mitochondrial	ATP5F1B	P06576	ATP biosynthetic process
11.	Succinate dehydrogenase [ubiquinone] flavoprotein subunit, mitochondrial	SDHA	P31040	transferring electrons from succinate to ubiquinone. Oxidoreductase
12.	WD repeat-containing protein 26	WDR26	Q9H7D7	negative regulator in MAPK signaling. Protects cells by promoting hypoxia-mediated autophagy and mitophagy. Mitochondrion. Cytoplasm and Cytosol. Nucleus
13.	Solute carrier family 25 member 44	SLC25A44	Q96H78	transmembrane transporter activity mitochondrial inner membrane
14.	Stress-70 protein, mitochondrial	HSPA9	P38646	Chaperone protein
15.	Ribosomal protein S6 kinase beta-1	RPS6KB1	P23443	Mitochondrion outer membrane, Mitochondrion. cell proliferation, cell growth and cell cycle progression
16.	ATP synthase subunit alpha, mitochondrial	ATP5F1A	P25705	proton-transporting ATP synthase activity, rotational mechanism, lipid metabolic process
17.	Alpha-aminoadipic semialdehyde dehydrogenase	ALDH7A1	P49419	Multifunctional enzyme mediating important protective effects. Oxidoreductase. Mitochondrion. Cytoplasm and Cytosol. Nucleus
18.	Mitofusin-1	MFN1	Q8IWA4	macroautophagy, mitochondrial fusion, mitochondrial membrane fusion
19.	Copper-transporting ATPase 2	ATP7B	P35670	Mitochondrion. Cytoplasm and Cytosol
20.	Fetal and adult testis-expressed transcript protein	FATE1	Q969F0	Localized to specific membrane structures termed mitochondria-associated membranes (MAMs) which connect the endoplasmic reticulum (ER) and the mitochondria. Also associated with the outer surface of mitochondria at sites that are not in close contact with the ER
21.	Cytochrome P450 2E1	CYP2E1	P05181	ER, Post-translationally targeted to mitochondria. Inactivates a number of drugs and xenobiotics. Monooxygenase, Oxidoreductase

## Sheet: S2(3)
Table S2(3). Ub-proteins related with energy homeostasis
Table S2(3a). control
	Recommended Protein Name	Gene	UniProt ID	Molecular function, Biological process, GO annotation
1.	Glyceraldehyde-3-phosphate dehydrogenase, testis-specific	GAPDHS	O14556	glycolytic process
2.	ATP synthase subunit beta, mitochondrial	ATP5F1B	P06576	ATP biosynthetic process
3.	5'-AMP-activated protein kinase catalytic subunit alpha-2	PRKAA2	P54646	Catalytic subunit of AMP-activated protein kinase (AMPK), an energy sensor protein kinase that plays a key role in regulating cellular energy metabolism
4.	Eukaryotic translation initiation factor 4 gamma 1	EIF4G1	Q04637	energy homeostasis
5.	Poly [ADP-ribose] polymerase 1	PARP1	P09874	negative regulation of ATP biosynthetic process, ATP generation from poly-ADP-D-ribose, Involved in the synthesis of ATP in the nucleus
6.	Eukaryotic translation initiation factor 4 gamma 1	EIF4G1	Q04637	energy homeostasis
7.	Polyubiquitin-B	UBB	P0CG47	energy homeostasis
Table S2(3b). DB1h
	Recommended Protein Name	Gene	UniProt ID	Molecular function, Biological process, GO annotation
1.	AMP deaminase 2	AMPD2	Q01433	critical role in energy metabolism.
2.	Glutamine--fructose-6-phosphate aminotransferase	GFPT2	O94808	energy reserve metabolic process
3.	Polyubiquitin-B	UBB	P0CG47	energy homeostasis
4.	Polyubiquitin-B	UBB	P0CG47	energy homeostasis
Table S2(3c). D4h
	Recommended Protein Name	Gene	UniProt ID	Molecular function, Biological process, GO annotation
1.	Eukaryotic translation initiation factor 4 gamma	EIF4G1	Q04637	energy homeostasis
2.	Poly [ADP-ribose] polymerase 1	PARP1	P09874	negative regulation of ATP biosynthetic process, ATP generation from poly-ADP-D-ribose, Involved in the synthesis of ATP in the nucleus
3.	Hexokinase-1	HK1	P19367	glycolytic process
4.	Glucose-6-phosphate 1-dehydrogenase	G6PD	P11413	NADPH regeneration, The main function of this enzyme is to provide reducing power (NADPH) and pentose phosphates for fatty acid and nucleic acid synthesis. glutathione metabolic process
5.	Polyubiquitin-B	UBB	P0CG47	energy homeostasis
6.	Polyubiquitin-B	UBB	P0CG47	energy homeostasis
Table S2(3d). DB4h
	Recommended Protein Name	Gene	UniProt ID	Molecular function, Biological process, GO annotation
1.	Glucose-6-phosphate 1-dehydrogenase	G6PD	P11413	NADPH regeneration, The main function of this enzyme is to provide reducing power (NADPH) and pentose phosphates for fatty acid and nucleic acid synthesis. glutathione metabolic process
2.	Eukaryotic translation initiation factor 4 gamma 1 (eIF-4-gamma 1)	EIF4G1	Q04637	energy homeostasis
3.	Poly [ADP-ribose] polymerase 1	PARP1	P09874	negative regulation of ATP biosynthetic process, ATP generation from poly-ADP-D-ribose, Involved in the synthesis of ATP in the nucleus
4.	Glucose-6-phosphate isomerase	GPI	P06744	гликолиз, ubiquitin protein ligase binding–Gluconeogenesis
5.	ATP synthase subunit alpha, mitochondrial	ATP5F1A	P25705	response to oxidative stress, electron transport chain etc.
6.	ATP-dependent 6-phosphofructokinase, platelet type	PFKP	Q01813	Catalyzes the phosphorylation of D-fructose 6-phosphate to fructose 1,6-bisphosphate by ATP, the first committing step of glycolysis.
7.	Glutamine-fructose-6-phosphate aminotransferase	GFPT2	O94808	energy reserve metabolic process, protein N-linked glycosylation
8.	Polyubiquitin-B	UBB	P0CG47	energy homeostasis
9.	Polyubiquitin-B	UBB	P0CG47	energy homeostasis

## Sheet: S2(4)
Table S2(4). Ub-proteims of response to exogenous stress
Table S2(4a). control
	Recommended Protein Name	Gene	UniProt ID	Molecular function, Biological process, GO annotation
1.	Complement C5	C5	P01031	Inflammatory response
2.	Tyrosine-protein kinase Lyn	LYN	P07948	Inflammatory response
3.	Histone deacetylase 5	HDAC5	Q9UQL6	Inflammatory response
4.	Annexin A1	ANXA1	P04083	Inflammatory response, response to drug, H2O2, X-rays, response to estradiol
5.	Amine oxidase [flavin-containing] B	MAOB	P27338	response to ethanol, metalls, response to corticosterone, xenobiotic metabolic process
6.	RE1-silencing transcription factor	REST	Q13127	response to drug, hypoxia
7.	ATP-binding cassette sub-family D member 3	ABCD3	P28288	response to organic cyclic compound
				response to drug
8.	ATP-binding cassette sub-family D member 3	ABCD3	P28288	response to organic cyclic compound. response to drug
9.	Sorbitol dehydrogenase	SORD	Q00796	response to drug. response to osmotic stress, Cd, Cu
10.	WD repeat-containing protein 35	WDR35	Q9P2L0	cellular response to paclitaxel, response to toxic substance
11.	Fructose-1,6-bisphosphatase 1	FBP1	P09467	cellular response to drug
12.	Probable helicase senataxin	SETX	Q7Z333	cellular response to hydrogen peroxide
13.	5'-AMP-activated protein kinase catalytic subunit alpha-2	PRKAA2	P54646	cellular response to oxidative stress
14.	Tissue-type plasminogen activator hypoxia	PLAT	P00750	Response to hypoxia
15.	Puromycin-sensitive aminopeptidase	NPEPPS	P55786	Response to hypoxia
16.	Heat shock 70 kDa protein 1A	HSPA1A	P0DMV8	cellular response to oxidative stress, heat.
17.	NT-3 growth factor receptor	NTRK3	Q16288	Response to ethanol
18.	Copper-transporting ATPase 2	ATP7B	P35670	xenobiotic detoxification by transmembrane export across the plasma membrane
Table S2(4b). DB1h
	Recommended Protein Name	Gene	UniProt ID	Molecular function, Biological process, GO annotation
1.	Annexin A1	ANXA1	P04083	Inflammatory response, response to drug, H2O2, X-rays, response to estradiol
2.	Toll-like receptor 9	TLR9	Q9NR96	Inflammatory response
	Pituitary adenylate cyclase-activating polypeptide type I receptor	ADCYAP1R1	P41586	response to ethanol
4.	Pleckstrin homology domain-containing family A member 1	PLEKHA1	Q9HB21	cellular response to hydrogen peroxide
5.	DNA repair-scaffolding protein	SPIDR	Q14159	camptothecin, ionizing radiation, hydroxyurea
6.	Pappalysin-2	PAPPA2	Q9BXP8	response to salt stress
7.	Integrin alpha-6		P23229	cellular response to organic cyclic compound. cellular response to extracellular stimulus
8.	Nucleoprotein TPR	TRP	P12270	cellular response to heat
9.	Stromelysin-2	MMP10	P09238	response to hypoxia,
10.	LIM domain-containing protein ajuba	AJUBA	Q96IF1	regulation of cellular response to hypoxia
11	Inositol 1,4,5-trisphosphate receptor type 2 (IP3 receptor isoform 2)	ITPR2	Q14571	response to hypoxia, cellular response to ethanol
12	Heat shock 70 kDa protein 1-like	HSPA1L	P34931	cellular response to heat
13.	Prostaglandin E synthase 3	PTGES3	Q15185	heat shock protein binding cellular response to heat
Table S2(4c). D4h
	Recommended Protein Name	Gene	UniProt ID	Molecular function, Biological process, GO annotation
1.	ATP-binding cassette sub-family F member 1	ABCF1	Q8NE71	Inflammatory response
2.	Complement C5	C5	P01031	Inflammatory response
3.	Annexin A1	ANXA1	P04083	Inflammatory response, response to drug, H2O2, X-rays, response to estradiol
4.	Rapamycin-insensitive companion of mTOR	RICTOR	Q6R327	regulation of inflammatory response
5.	Regulatory-associated protein of mTOR	RPTOR	Q8N122	cellular response to heat
6.	Regulatory-associated protein of mTOR	RPTOR	Q8N122	cellular response to heat
7.	Atypical chemokine receptor 2	ACKR2	O00590	Inflammatory response
8.	Histone deacetylase	HDAC9	Q9UKV0	Inflammatory response
9.	NACHT, LRR and PYD domains-containing protein 4	NLRP4	Q96MN2	Inflammatory response
10.	A disintegrin and metalloproteinase with thrombospondin motifs 12	ADAMTS12	P58397	regulation of inflammatory response
11.	Histone-lysine N-methyltransferase ASH1L	ASH1L	Q9NR48	negative regulation of acute inflammatory response
12.	Interleukin-17A	IL17A	Q16552	Inflammatory response
13.	Transient receptor potential cation channel subfamily A member 1	TRPA1	O75762	cellular response to organic cyclic compound. cellular response to hydrogen peroxide
14.	Protein phosphatase 1 regulatory subunit 14A	PPP1R14A	Q96A00	response to drug
15.	Signal recognition particle subunit SRP68	SRP68	Q9UHB9	response to drug
16.	Cell cycle and apoptosis regulator protein 2	CCAR2	Q8N163	cellular response to heat, UV
17.	LIM domain-containing protein ajuba	AJUBA	Q96IF1	regulation of cellular response to hypoxia
18.	LIM domain-containing protein ajuba	AJUBA	Q96IF1	regulation of cellular response to hypoxia
19.	Puromycin-sensitive aminopeptidase	NPEPPS	P55786	response to hypoxia
20.	Proteasome activator complex subunit 3	PSME3	P61289	response to hypoxia
21.	Endoplasmin	HSP90B1	P14625	response to hypoxia Belongs to the heat shock protein 90 family.
22.	Ryanodine receptor 1	RyR1	P21817	response to hypoxia
23.	Inositol 1,4,5-trisphosphate receptor type 2	ITPR2	Q14571	response to hypoxia
24.	Iron-responsive element-binding protein 2	IREB2	P48200	response to hypobaric hypoxia. response to copper ion, Zn, Fe
25.	Valacyclovir hydrolase	BPHL	Q86WA6	Hydrolase, xenobiotic metabolic process, response to toxic substance
26.	L-lactate dehydrogenase A chain	LDHA	P00338	response to hypoxia, drug, H2O2
27.	NT-3 growth factor receptor	NTRK3	Q16288	Response to ethanol
Table S2(4d). DB4h
	Recommended Protein Name	Gene	UniProt ID	Molecular function, Biological process, GO annotation
1.	ATP-binding cassette sub-family F member 1	ABCF1	Q8NE71	Inflammatory response
2.	Complement C5	C5	P01031	Inflammatory response
3.	Complement C5	C5	P01031	Inflammatory response
4.	Complement component C6	C6	P13671	complement activation, classical pathway
5.	Annexin A1	ANXA1	P04083	Inflammatory response, response to drug, H2O2, X-rays
6.	Reticulon-4	RTN4	Q9NQC3	Inflammatory response. response to hypoxia
7.	Rapamycin-insensitive companion of mTOR	RICTOR	Q6R327	regulation of inflammatory response
8.	P-selectin	SELP	P16109	Inflammatory response
9.	CD5 antigen-like	CD5L	O43866	Inflammatory response
10.	Progranulin	GRN	P28799	Inflammatory response, Cytokine
11.	Actin filament-associated protein 1-like 2	AFAP1L2	Q8N4X5	Inflammatory response
12.	Baculoviral IAP repeat-containing protein 3	BIRC3	Q13489	Inflammatory response
13.	Calcium/calmodulin-dependent protein kinase type IV	CAMK4	Q16566	Inflammatory response
14.	Interleukin-17 receptor B	IL17RB	Q9NRM6	Receptor for the proinflammatory cytokines IL17B and IL17E. defense response
15.	E3 ubiquitin-protein ligase Itchy homolog	ITCH	Q96J02	Inflammatory response
16.	Hepatocyte growth factor	HGF	P14210	negative regulation of inflammatory response
17.	Sodium channel protein type 11 subunit alpha	SCN11A	Q9UI33	response to drug
18.	Gamma-glutamyl hydrolase	GGH	Q92820	response to zinc ion, ethanol
19.	Bleomycin hydrolase	BLMH	Q13867	response to drug. response to toxic substance
20.	Microtubule-associated protein 2	MAP2	P11137	cellular response to organic substance
21.	SLIT and NTRK-like protein 5	SLITRK5	O94991	response to drug
22.	2',3'-cyclic-nucleotide 3'-phosphodiesterase	CNP	P09543	response to drug
23.	DNA replication licensing factor	MCM7	P33993	response to drug
24.	DNA methyltransferase 1-associated protein 1	DMAP1	Q9NPF5	response to ethanol
25.	Histone-lysine N-methyltransferase SETDB1	SETDB1	Q15047	response to ethanol
26.	Regulator of G-protein signaling 4	RGS4	P49798	response to ethanol. response to amphetamine. response to cocaine.
27.	RE1-silencing transcription factor	REST	Q13127	response to drug, hypoxia
28.	DNA topoisomerase 2-alpha	TOP2A	P11388	drug binding
29.	Disintegrin and metalloproteinase domain-containing protein 17	ADAM17	P78536	response to drug, hypoxia
30.	Protein-tyrosine kinase 2-beta	PTK2B	Q14289	response to ethanol, hypoxia, hydrogen peroxide.
31.	Puromycin-sensitive aminopeptidase	NPEPPS	P55786	Response to hypoxia
32.	Fanconi anemia group J protein	BRIP1	Q9BX63	response to hypoxia. response to toxic substance
33.	C-type natriuretic peptide	NPPC	P23582	response to ethanol, hypoxia, drug
34.	Ryanodine receptor 1	RyR1	P21817	response to hypoxia
35.	Stress-induced-phosphoprotein 1	STIP1	P31948	Acts as a co-chaperone for HSP90AA1 Hsp70 protein binding
36.	Fidgetin-like protein 1	FIGNL1	Q6PIW4	cellular response to ionizing radiation
37.	Heat shock 70 kDa protein 12A	HSPA12A	O43301
38.	Heat shock 70 kDa protein 1A	HSPA1A	P0DMV8	protection of the proteome from stress
39.	Transient receptor potential cation channel subfamily V member 3	TRPV3	Q8NET8	response to heat
40.	Glucose-6-phosphate 1-dehydrogenase	G6PD	P11413	cellular response to oxidative stress, ethanol, organic cyclic compound
41.	UDP-glucuronosyltransferase 1-6	UGT1A6	P19224	xenobiotic metabolic process, xenobiotic glucuronidation
42.	UDP-glucuronosyltransferase 2B4	UGT2B4	P06133	Glycosyltransferase, Transferase; cellular glucuronidation. The modification of an organic chemical by the conjugation of glucuronic acid.
43.	Prostaglandin reductase 1 PTGR1	PTGR1	Q14914	response to antineoplastic agent NAD(P)H-dependent oxidoreductase involved in metabolic inactivation of drugs
44.	Cytochrome P450 2E1	CYP2E1	P05181	xenobiotic metabolic process
45.	Cell cycle and apoptosis regulator protein 2	CCAR2	Q8N163	cellular response to heat, UV
46.	L-lactate dehydrogenase A chain	LDHA	P00338	response to hypoxia, drug, H2O2
47.	Phospholipid-transporting ATPase IC	ATP8B1	O43520	drug transmembrane transport
48.	RalA-binding protein 1	RALBP1	Q15311	xenobiotic detoxification by transmembrane export across the plasma membrane
49.	Alpha-aminoadipic semialdehyde dehydrogenase	ALDH7A1	P49419	Protects cells from oxidative stress by metabolizing a number of lipid peroxidation-derived aldehydes
50.	NT-3 growth factor receptor	NTRK3	Q16288	Response to ethanol
51.	N6-adenosine-methyltransferase catalytic subunit	METTL3	Q86U44	cellular response to UV
52.	Copper-transporting ATPase 2	ATP7B	P35670	xenobiotic detoxification by transmembrane export across the plasma membrane
53.	Ribosomal protein S6 kinase beta-1	RPS6KB1	P23443	response to ethanol, drug, response to heat

## Sheet: S2(5)
Table S2(5). Ub-proteins related with Apoptosis and DNA damage/repair
Table S2(5a). control		5 oxidized proteins
	Recommended Protein Name	Gene	UniProt ID	Molecular function, Biological process, GO annotation
1.	Trichoplein keratin filament-binding protein	TCHP	Q9BT92	Tumor suppressor which has the ability to inhibit cell growth and be pro-apoptotic during cell stress. Apoptosis
2.	Cytoskeleton-associated protein 2	CKAP2	Q8WWK9	Apoptosis, Cell cycle
3.	Prolyl endopeptidase FAP	FAP	Q12884	Apoptosis. positive regulation of cell cycle arrest
4.	Heat shock 70 kDa protein 1A	HSPA1A	P0DMV8	Stress response, negative regulation of apoptotic process, negative regulation of endoplasmic reticulum stress-induced intrinsic apoptotic signaling pathway
5.	Tyrosine-protein kinase ABL1	ABL1	P00519	Apoptosis, DNA damage, DNA repair. cell cycle arrest
6.	Poly [ADP-ribose] polymerase 1	PARP1	P09874	apoptotic process, DNA damage, DNA repair
7.	N-alpha-acetyltransferase 16, NatA auxiliary subunit	NAA16	Q6N069	negative regulation of apoptotic process
8.	Protein ECT2	ECT2	Q9H8V3	positive regulation of apoptotic process. Cell cycle, Cell division
9.	Protein unc-13 homolog B	UNC13B	O14795	positive regulation of apoptotic process
10.	Probable helicase senataxin	SETX	Q7Z333	DNA damage, DNA recombination, DNA repair, negative regulation of apoptotic process
11.	Annexin A1	ANXA1	P04083	negative regulation of apoptotic process, positive regulation of G1/S transition of mitotic cell cycle; oxidized
12.	A-kinase anchor protein 13	AKAP13	Q12802	positive regulation of apoptotic process
13.	Alpha-actinin-2	ACTN2	P35609	regulation of apoptotic process
14.	Rho GTPase-activating protein7	DLC1	Q96QB1	positive regulation of execution phase of apoptosis
15.	Stress-70 protein, mitochondrial (Heat shock 70 kDa protein 9)	HSPA9	P38646	Chaperone, negative regulation of apoptotic process; oxidized
16.	CAP-Gly domain-containing linker protein 3	CLIP3	Q96DZ5	positive regulation of apoptotic process
17.	5'-AMP-activated protein kinase catalytic subunit alpha-2	PRKAA2	P54646	negative regulation of apoptotic process
18.	Aryl-hydrocarbon-interacting protein-like 1	AIPL1	Q9NZN9	negative regulation of apoptotic process
19.	WD repeat-containing protein 35	WDR35	Q9P2L0	positive regulation of cysteine-type endopeptidase activity involved in apoptotic process
20.	RE1-silencing transcription factor	REST	Q13127	positive regulation of apoptotic process
21.	Polyubiquitin-B	UBB	P0CG47	DNA damage response, detection of DNA damage. negative regulation of apoptotic process. positive regulation of intrinsic apoptotic signaling pathway by p53 class mediator
22.	Tyrosine-protein kinase Lyn	LYN	P07948	responses to DNA damage and genotoxic agents. positive regulation of dendritic and B cell apoptotic process
23.	Gelsolin	GSN	P06396	positive regulation of cysteine-type endopeptidase activity involved in apoptotic signaling pathway; oxidized
24.	Breast cancer type 1 susceptibility protein	BRCA1	P38398	Cell cycle, DNA damage, DNA recombination, DNA repair, Transcription regulation
25.	DNA ligase 4	LIG4	P49917	Cell cycle, Cell division, DNA damage, DNA recombination, DNA repair, DNA replication; oxidized
26.	Replication protein A 70 kDa DNA-binding subunit	RPA1	P27694	DNA damage, DNA recombination, DNA repair, DNA replication. G1/S transition of mitotic cell cycle
27.	(E2-independent) E3 ubiquitin-conjugating enzyme FATS	C10orf90	Q96M02	Tumor suppressor that is required to sustain G2/M checkpoint after DNA damage
28.	F-box only protein 4	FBXO4	Q9UKT5	regulation of DNA damage checkpoint
29.	CCR4-NOT transcription complex subunit 3	CNOT3	O75175	DNA damage response, signal transduction by p53 class mediator resulting in cell cycle arrest
30.	E3 ubiquitin-protein ligase RAD18	RAD18	Q9NS91	DNA damage, DNA repair of UV-damaged DNA. negative regulation of cell death
31.	Protein DEK	DEK	P35659	Involved in chromatin organization, regulation of double-strand break repair; oxidized
32.	Diacylglycerol kinase zeta	DGKZ	Q13574	mitotic G1 DNA damage checkpoint
33.	Alkylated DNA repair protein alkB homolog 8	ALKBH8	Q96BT7	cellular response to DNA damage stimulus
34.	DNA repair protein SWI5 homolog	SWI5	Q1ZZU3	required for double-strand break repair
35.	DNA repair protein RAD50	RAD50	Q92878	Component of the MRN complex, which plays a central role in double-strand break (DSB) repair, DNA recombination, maintenance of telomere integrity and meiosis
36.	RNA-binding protein FUS	FUS	P35637	DNA repair and damage response
37.	DNA helicase MCM9	MCM9	Q9NXL9	repair of double-stranded DNA breaks (DBSs) and DNA interstrand cross-links
Table S2(5b). DB1h		4 oxidized proteins
	Recommended Protein Name	Gene	UniProt ID	Molecular function, Biological process, GO annotation
1.	GRAM domain-containing protein 4	GRAMD4	Q6IC98	Apoptosis positive regulation of cysteine-type endopeptidase activity involved in apoptotic process
2.	Annexin A1	ANXA1	P04083	negative regulation of apoptotic process, positive regulation of G1/S transition of mitotic cell cycle; oxidized
3.	A-kinase anchor protein 13	AKAP13	Q12802	positive regulation of apoptotic process
4.	Alpha-actinin-2	ACTN2	P35609	regulation of apoptotic process
5.	Stress-70 protein, mitochondrial (Heat shock 70 kDa protein 9)	HSPA9	P38646	Chaperone, negative regulation of apoptotic process; oxidized
6.	2'-5'-oligoadenylate synthase 1	OAS1	P00973	may also play a role in apoptosis, cell growth, differentiation and gene regulation
7.	DNA-dependent protein kinase catalytic subunit	PRKDC	P78527	intrinsic apoptotic signaling pathway in response to DNA damage, DNA damage, DNA recombination, DNA repair
8.	Catenin alpha-1	CTNNA1	P35221	regulation of extrinsic apoptotic signaling pathway in absence of ligand
9.	60S ribosomal protein L26	RPL26	P61254	positive regulation of intrinsic apoptotic signaling pathway in response to DNA damage by p53 class mediator. positive regulation of DNA damage response
10.	60S ribosomal protein L26	RPL26	P61254	positive regulation of intrinsic apoptotic signaling pathway in response to DNA damage by p53 class mediator. positive regulation of DNA damage response
11.	BRCA1-associated RING domain protein 1	BARD1	Q99728	positive regulation of apoptotic process. negative regulation of apoptotic process. cell cycle arrest.
				DNA damage, DNA repair; oxidized
12.	Integrin alpha-6	ITGA6	P23229	positive regulation of apoptotic process. negative regulation of extrinsic apoptotic signaling pathway
13.	SAM pointed domain-containing Ets transcription factor	SPDEF	O95238	positive regulation of apoptotic process
14.	Cullin-1	CUL1	Q13616	intrinsic apoptotic signaling pathway. G1/S и G2/M transition of mitotic cell cycle
15.	NAD(P) transhydrogenase, mitochondrial	NNT	Q13423	negative regulation of apoptotic process
16.	Polyubiquitin-B	UBB	P0CG47	DNA damage response, detection of DNA damage. negative regulation of apoptotic process. positive regulation of intrinsic apoptotic signaling pathway by p53 class mediator
17.	Polyubiquitin-B	UBB	P0CG47	DNA damage response, detection of DNA damage. negative regulation of apoptotic process. positive regulation of intrinsic apoptotic signaling pathway by p53 class mediator
18.	Filamin-A	FLNA	P21333	negative regulation of apoptotic process
19.	Mediator of DNA damage checkpoint protein 1	MDC1	Q14676	Cell cycle, DNA damage, DNA repair PTM: Ubiquitinated by RNF4, leading to proteasomal degradation; undergoes 'Lys-48'-linked polyubiquitination.
20.	Mediator of DNA damage checkpoint protein 1	MDC1	Q14676	Cell cycle, DNA damage, DNA repair
21.	Securin	PTTG1	O95997	Cell cycle, Cell division, Chromosome partition, DNA damage, DNA repair, Mitosis
22.	F-box only protein 5	FBXO5	Q9UKT4	Cell cycle, Cell division, Mitosis negative regulation of response to DNA damage stimulus PTM: Undergoes both 'Lys-11' and 'Lys-48'-linked polyubiquitination by APC-FZR1 complex leading to degradation by proteasome during G1 phase
23.	F-box only protein 4	FBXO4	Q9UKT5	regulation of DNA damage checkpoint
24.	F-box only protein 4	FBXO4	Q9UKT5	regulation of DNA damage checkpoint
25.	DNA helicase MCM8	MCM8	Q9UJA3	Component of the MCM8-MCM9 complex Cell cycle, DNA damage, DNA repair, DNA replication
26.	Methyl-CpG-binding domain protein 4	MBD4	O95243	Mismatch-specific DNA N-glycosylase involved in DNA repair
27.	RNA-binding protein FUS	FUS	P35637	DNA repair and damage response
28.	DNA repair-scaffolding protein	SPIDR	Q14159	Plays a role in DNA double-strand break (DBS) repair via homologous recombination, cellular response to DNA damage stimulus; oxidized
Table S2(5c). D4h		4 oxidized proteins
	Recommended Protein Name	Gene	UniProt ID	Molecular function, Biological process, GO annotation
1.	Myocyte-specific enhancer factor 2D	MEF2D	Q14814	Apoptosis
2.	Cell cycle and apoptosis regulator protein 2	CCAR2	Q8N163	Apoptosis, Cell cycle, DNA damage
3.	Receptor of activated protein C kinase 1	RACK1	P63244	Apoptosis. Cell cycle. cysteine-type endopeptidase activator activity involved in apoptotic process; oxidized
4.	Proteasome activator complex subunit 3	PSME3	P61289	Apoptosis. Cell cycle
5.	Caspase activity and apoptosis inhibitor 1	CAAP1	Q9H8G2	Apoptosis
6.	Prolyl endopeptidase FAP	FAP	Q12884	Apoptosis; oxidized
7.	Annexin A1	ANXA1	P04083	negative regulation of apoptotic process, positive regulation of G1/S transition of mitotic cell cycle; oxidized
8.	A-kinase anchor protein 13	AKAP13	Q12802	positive regulation of apoptotic process
9.	Alpha-actinin-2	ACTN2	P35609	regulation of apoptotic process
10.	N-alpha-acetyltransferase 15, NatA auxiliary subunit	NAA15	Q9BXJ9	negative regulation of apoptotic process
11.	Interleukin-17A (IL-17)	IL17A	Q16552	apoptotic process
12.	Receptor tyrosine-protein kinase erbB-3	ERBB3	P21860	extrinsic apoptotic signaling pathway in absence of ligand
13.	Roundabout homolog 1	ROBO1	Q9Y6N7	activation of cysteine-type endopeptidase activity involved in apoptotic process
14.	SNW domain-containing protein 1	SNW1	Q13573	intrinsic apoptotic signaling pathway in response to DNA damage by p53 class mediator
15.	Fibroblast growth factor 4	FGF4	P08620	apoptotic process involved in morphogenesis
16.	Probable helicase senataxin	SETX	Q7Z333	DNA damage, DNA recombination, DNA repair, negative regulation of apoptotic process
17.	Endoplasmin	HSP90B1	P14625	negative regulation of apoptotic process
18.	Uveal autoantigen with coiled-coil domains and ankyrin repeats	UACA	Q9BZF9	apoptotic signaling pathway, positive regulation of cysteine-type endopeptidase activity involved in apoptotic process
19.	ATPase family AAA domain-containing protein 3A	ATAD3A	Q9NVI7	negative regulation of apoptotic process
20.	Tyrosine-protein phosphatase non-receptor type 13	PTPN13	Q12923	Tyrosine phosphatase which regulates negatively FAS-induced apoptosis and NGFR-mediated pro-apoptotic signaling
21.	Exocyst complex component 5	EXOC5	O00471	epithelial cell apoptotic process
22.	Citron Rho-interacting kinase	CIT	O14578	Cell cycle, Cell division, Mitosis, neuron apoptotic process
23.	Transcriptional coactivator YAP1	YAP1	P46937	negative regulation of extrinsic apoptotic signaling pathway. cellular response to DNA damage stimulus
24.	Poly [ADP-ribose] polymerase 1	PARP1	P09874	apoptotic process, DNA damage, DNA repair
25.	Polyubiquitin-B	UBB	P0CG47	DNA damage response, detection of DNA damage. negative regulation of apoptotic process. positive regulation of intrinsic apoptotic signaling pathway by p53 class mediator
26.	Polyubiquitin-B	UBB	P0CG47	DNA damage response, detection of DNA damage. negative regulation of apoptotic process. positive regulation of intrinsic apoptotic signaling pathway by p53 class mediator
27.	Son of sevenless homolog 1 (SOS-1)	SOS1	Q07889	positive regulation of apoptotic process
28.	Ankyrin repeat domain-containing protein 17	ANKRD17	O75179	Could play pivotal roles in cell cycle and DNA regulation, positive regulation of G1/S transition of mitotic cell cycle. regulation of DNA replication
29.	Protein mono-ADP-ribosyltransferase PARP9	PARP9	Q8IXQ6	role in DNA damage repair, transcription corepressor activity
30.	DNA repair protein RAD51 homolog 2	RAD51B	O15315	Involved in the homologous recombination repair (HRR) pathway of double-stranded DNA breaks arising during DNA replication or induced by DNA-damaging agents. positive regulation of G2/M transition of mitotic cell cycle; oxidized
31.	DNA helicase MCM9	MCM9	Q9NXL9	repair of double-stranded DNA breaks (DBSs) and DNA interstrand cross-links
32.	DNA helicase MCM9	MCM9	Q9NXL9	repair of double-stranded DNA breaks (DBSs) and DNA interstrand cross-links
33.	E3 ubiquitin-protein ligase UBR5	UBR5	O95071	DNA damage, DNA repair, Ubl conjugation pathway
34.	E3 ubiquitin-protein ligase HERC2	HERC2	O95714	DNA damage, DNA repair, Ubl conjugation pathway
35.	Testis-expressed protein 15	TEX15	Q9BXT5	DNA repair
36.	Endonuclease V	ENDOV	Q8N8Q3	DNA repair
37.	Lysine-specific demethylase 4D	KDM4D	Q6B0I6	damaged DNA binding, double-strand break repair via homologous recombination
38.	RNA-binding protein FUS	FUS	P35637	DNA repair and damage response
Table S(25d). DB4h		17 oxidized proteins
	Recommended Protein Name	Gene	UniProt ID	Molecular function, Biological process, GO annotation
1.	Cysteine/serine-rich nuclear protein 2 (Protein FAM130A1; protein phosphatase 1, regulatory subunit 72; TAIP-12; TGF-beta induced apoptosis protein 12)	CSRNP2	Q9H175	Apoptosis
2.	CD5 antigen-like	CD5L	O43866	Apoptosis 11 disulfide bonds
3.	Baculoviral IAP repeat-containing protein 3	BIRC3	Q13489	Apoptosis PTM: Auto-ubiquitinated and degraded by the proteasome in apoptotic cells
4.	Fetal and adult testis-expressed transcript protein	FATE1	Q969F0	Apoptosis negative regulation of apoptotic process; oxidized
5.	Programmed cell death protein 4	PDCD4	Q53EL6	Apoptosis PTM: Polyubiquitinated, leading to its proteasomal degradation. negative regulation of apoptotic process; positive regulation of endothelial cell apoptotic process
6.	Mitochondrial ubiquitin ligase activator of NFKB 1	MUL1	Q969V5	Apoptosis PTM: Polyubiquitinated, leading to its proteasomal degradation.
7.	Rho-associated protein kinase 1	ROCK1	Q13464	Apoptosis; cleaved by caspase-3 during apoptosis. This leads to constitutive activation of the kinase and membrane blebbing. oxidized
8.	E3 ubiquitin-protein ligase Itchy homolog	ITCH	Q96J02	Apoptosis negative regulation of apoptotic process; oxidized
9.	Ribosomal protein S6 kinase beta-1	RPS6KB1	P23443	Apoptosis, Cell cycle negative regulation of apoptotic process
10.	Probable ATP-dependent RNA helicase DDX47	DDX47	Q9H0S4	Apoptosis extrinsic apoptotic signaling pathway via death domain receptors
11.	Cell cycle and apoptosis regulator protein 2	CCAR2	Q8N163	Apoptosis, Cell cycle, DNA damage positive regulation of apoptotic process negative regulation of intrinsic apoptotic signaling pathway in response to DNA damage
12.	Annexin A1	ANXA1	P04083	negative regulation of apoptotic process
13.	A-kinase anchor protein 13	AKAP13	Q12802	positive regulation of apoptotic process
14.	Alpha-actinin-2	ACTN2	P35609	regulation of apoptotic process,
15.	N-alpha-acetyltransferase 15, NatA auxiliary subunit	NAA15	Q9BXJ9	negative regulation of apoptotic process
16.	Left-right determination factor 2	LEFTY2	O00292	regulation of apoptotic process
17.	DNA topoisomerase 2-alpha	TOP2A	P11388	positive regulation of apoptotic process. Essential during mitosis and meiosis for proper segregation of daughter chromosomes. cellular response to DNA damage stimulus
18.	T-lymphoma invasion and metastasis-inducing protein 2	TIAM2	Q8IVF5	regulation of apoptotic process
19.	Proliferation-associated protein 2G4	PA2G4	Q9UQ80	negative regulation of apoptotic process; oxidized
20.	RE1-silencing transcription factor	REST	Q13127	positive regulation of apoptotic process
21.	DNA-dependent protein kinase catalytic subunit	PRKDC	P78527	intrinsic apoptotic signaling pathway in response to DNA damage, DNA damage, DNA recombination, DNA repair
22.	60S ribosomal protein L26	RPL26	P61254	positive regulation of intrinsic apoptotic signaling pathway in response to DNA damage by p53 class mediator. positive regulation of DNA damage response
23.	Gasdermin-E	GSDME	O60443	positive regulation of intrinsic apoptotic signaling pathway. Necrosis. pyroptosis; oxidized
24.	Obscurin	OBSCN	Q5VST9	positive regulation of apoptotic process
25.	Disintegrin and metalloproteinase domain-containing protein 17	ADAM17	P78536	regulation of mast cell apoptotic process; response to drug; oxidized
26.	Protein odd-skipped-related 1	OSR1	Q8TAX0	negative regulation of apoptotic process
27.	WD repeat-containing protein 26	WDR26	Q9H7D7	Protects cells from oxidative stress-induced apoptosis via the down-regulation of AP-1 transcriptional activity as well as by inhibiting cytochrome c release from mitochondria
28.	BRCA1-associated ATM activator 1	BRAT1	Q6PJG6	apoptotic process, DNA damage
29.	Interleukin-31 receptor subunit alpha	IL31RA	Q8NI17	negative regulation of apoptotic process
30.	Wilms tumor protein	WT1	P19544	regulation of apoptotic process.
31.	Ras-specific guanine nucleotide-releasing factor 2	RASGRF2	O14827	positive regulation of apoptotic process
32.	Protein-tyrosine kinase 2-beta	PTK2B	Q14289	negative regulation of apoptotic process; oxidized
33.	Cytokine receptor-like factor 1	CRLF1	O75462	negative regulation of neuron apoptotic process
34.	Transcription factor E2F2	E2F2	Q14209	intrinsic apoptotic signaling pathway by p53 class mediator Cell cycle
35.	Fidgetin-like protein 1	FIGNL1	Q6PIW4	negative regulation of apoptotic process regulation of cell cycle, regulation of double-strand break repair via homologous recombination
36.	Mucosa-associated lymphoid tissue lymphoma translocation protein 1	MALT1	Q9UDY8	negative regulation of apoptotic process; oxidized
37.	RNA polymerase I-specific transcription initiation factor RRN3	RRN3	Q9NYV6	negative regulation of intrinsic apoptotic signaling pathway by p53 class mediator
38.	Mediator of RNA polymerase II transcription subunit 1	MED1	Q15648	negative regulation of apoptotic process. positive regulation of G0 to G1 transition; oxidized
39.	DnaJ homolog subfamily C member	DNAJC3	Q13217	negative regulation of apoptotic process
40.	Reticulophagy regulator 1	RETREG1	Q9H6L5	negative regulation of neuron apoptotic process
41.	RB1-inducible coiled-coil protein 1	RB1CC1	Q8TDY2	negative regulation of extrinsic apoptotic signaling pathway, Cell cycle
42.	Probable G-protein coupled receptor 132	GPR132	Q9UNW8	May be involved in apoptosis. Functions at the G2/M checkpoint to delay mitosis. Stress response; oxidized
43.	Heat shock 70 kDa protein 1A	HSPA1A	P0DMV8	Stress response, negative regulation of apoptotic process
44.	Sentrin-specif protease 1	SENP1	Q9P0U3	activation of cysteine-type endopeptidase activity involved in apoptotic process. apoptotic signaling pathway
45.	Guanine nucleotide exchange factor DBS	MCF2L	O15068	positive regulation of apoptotic process
46.	Hepatocyte growth factor	HGF	P14210	negative regulation of apoptotic process
47.	Tyrosine-protein phosphatase non-receptor type 13	PTPN13	Q12923	regulates negatively FAS-induced apoptosis and NGFR-mediated pro-apoptotic signaling
48.	Elongation factor 1-alpha 2	EEF1A2	Q05639	positive regulation of apoptotic process
49.	Reticulon-4	RTN4	Q9NQC3	regulation of apoptotic process
50.	Integrin beta-1	ITGB1	P05556	positive regulation of apoptotic process
51.	GPI transamidase component PIG-T	PIGT	Q969N2	neuron apoptotic process
52.	Poly [ADP-ribose] polymerase 1	PARP1	P09874	apoptotic process, DNA damage, DNA repair
53.	Stress-70 protein, mitochondrial (Heat shock 70 kDa protein 9)	HSPA9	P38646	Chaperone negative regulation of apoptotic process
54.	Polyubiquitin-B	UBB	P0CG47	DNA damage response, detection of DNA damage. negative regulation of apoptotic process. positive regulation of intrinsic apoptotic signaling pathway by p53 class mediator
55.	Polyubiquitin-B	UBB	P0CG47	DNA damage response, detection of DNA damage. negative regulation of apoptotic process. positive regulation of intrinsic apoptotic signaling pathway by p53 class mediator
56.	Son of sevenless homolog 1 (SOS-1)	SOS1	Q07889	positive regulation of apoptotic process
57.	Double-stranded RNA-specific adenosine deaminase	ADAR	P55265	negative regulation of apoptotic process
58.	Gelsolin	GSN	P06396	positive regulation of cysteine-type endopeptidase activity involved in apoptotic signaling pathway; Disulfide bond; oxidized
59.	Filamin-A	FLNA	P21333	negative regulation of apoptotic process
60.	L-lactate dehydrogenase A chain	LDHA	P00338	positive regulation of apoptotic process
61.	Histone-lysine N-methyltransferase, H3 lysine-79 specific	DOT1L	Q8TEK3	DNA damage checkpoint
62.	DNA cross-link repair 1A protein	DCLRE1A	Q6PJP8	Cell cycle, Cell division, DNA damage, DNA repair, Mitosis
63.	Protein lin-9 homolog	LIN9	Q5TKA1	Cell cycle, DNA synthesis
64.	Cell division cycle 5-like protein	CDC5L	Q99459	Cell cycle, DNA damage, DNA repair, mRNA processing, mRNA splicing
65.	CCR4-NOT transcription complex subunit 2	CNOT2	Q9NZN8	DNA damage response, signal transduction by p53 class mediator resulting in cell cycle arrest; oxidized
66.	Fanconi anemia group J protein	BRIP1	Q9BX63	DNA damage checkpoint, DNA repair
67.	DNA methyltransferase 1-associated protein 1	DMAP1	Q9NPF5	regulation of apoptotic process , DNA repair
68.	Kinesin-like protein KIF22	KIF22	Q14807	mitotic cell cycle, DNA repair; oxidized
69.	UPF0691 protein C9orf116	C9orf116	Q5BN46	cellular response to DNA damage stimulus
70.	N6-adenosine-methyltransferase catalytic subunit	METTL3	Q86U44	cellular response to DNA damage stimulus, RNA methyltransferase activity, positive regulation of cap-independent translational initiation
71.	DNA mismatch repair protein Msh3	P20585	P20585	DNA repair
72.	E3 ubiquitin-protein ligase HERC2	HERC2	O95714	DNA damage, DNA repair, Ubl conjugation pathway; oxidized
73.	Histone-lysine N-methyltransferase	SETD2	Q9BYW2	regulation of double-strand break repair
74.	Ubiquitin carboxyl-terminal hydrolase isozyme L5	UCHL5	Q9Y5K5	DNA damage, DNA recombination, DNA repair, Transcription regulation, Ubl conjugation pathway; oxidized
75.	COP9 signalosome complex subunit 7b	COPS7B	Q9H9Q2	nucleotide-excision repair, DNA damage recognition; oxidized
76.	RNA-binding protein FUS	FUS	P35637	DNA repair and damage response
77.	Tyrosine-protein kinase BAZ1B	BAZ1B	Q9UIG0	cellular response to DNA damage stimulus
78.	DNA helicase MCM9	MCM9	Q9NXL9	repair of double-stranded DNA breaks (DBSs) and DNA interstrand cross-links
79.	Retinoblastoma-binding protein 5	RBBP5	Q15291	histone-lysine N-methyltransferase activity, cellular response to DNA damage stimulus
80.	Lysine-specific demethylase 4D	KDM4D	Q6B0I6	damaged DNA binding, double-strand break repair via homologous recombination
81.	Protein mono-ADP-ribosyltransferase PARP9	PARP9	Q8IXQ6	DNA damage, DNA repair, transcription corepressor activity
82.	Adenomatous polyposis coli protein	APC	P25054	positive regulation of apoptotic process; negative regulation of G1/S transition of mitotic cell cycle; cellular response to DNA damage stimulus. Ubiquitinated, leading to its degradation by the proteasome. Ubiquitination is facilitated by Axin. Deubiquitinated by ZRANB1/TRABID. oxidized

## Sheet: S2(6)
Table S2(6). Autophagy-and necro(pto)sis related Ub-proteins
Table S2(6a). Control
	Recommended Protein Name	Gene	UniProt ID	Biological process, molecular function. GO annotation
1.	Phosphatidylinositol 3-kinase catalytic subunit type 3	PIK3C3	Q8NEB9	Autophagy; Cell cycle
2.	5'-AMP-activated protein kinase catalytic subunit alpha-2 PRKAA2	PRKAA2	P54646	Autophagy; Chromatin regulator
3.	Elongation factor 1-alpha 1	EEF1A1	P68104	regulation of chaperone-mediated autophagy oxidized
4.	Eukaryotic translation initiation factor 4 gamma 1	EIF4G1	Q04637	negative regulation of autophagy oxidized
5.	Tyrosine-protein kinase ABL1	ABL1	P00519	Apoptosis; Autophagy
6.	Sorting nexin-32	SNX32	Q86XE0	regulation of macroautophagy
7.	Vacuolar protein sorting-associated protein 13C	VPS13C	Q709C8	Involved in the regulation of PINK1/PRKN-mediated mitophagy in response to mitochondrial depolarization oxidized
8.	Eukaryotic translation initiation factor 4 gamma 1	EIF4G1	Q04637	negative regulation of autophagy not oxidized
Table S2(6b). DB1h
	Recommended Protein Name	Gene	UniProt ID	Biological process, molecular function. GO annotation
1.	Autophagy-related protein 2 homolog B	ATG2B	Q96BY7	Autophagy
2.	Microtubule-associated proteins 1A/1B light chain 3C	MAP1LC3C	Q9BXW4	Autophagy
3.	Sulfhydryl oxidase 1	QSOX1	O00391	negative regulation of macroautophagy
4.	Serine/threonine-protein phosphatase PGAM5, mitochondrial	PGAM5	Q96HS1	macroautophagy; necroptotic process
5.	Sorting nexin-32	SNX32	Q86XE0	regulation of macroautophagy
6.	Mixed lineage kinase domain-like protein	MLKL	Q8NB16	necroptotic process; Biological process: Necrosis
Table S2(6c). D4h
	Recommended Protein Name	Gene	UniProt ID	Biological process, molecular function. GO annotation
1.	UBX domain-containing protein 6	UBXN6	Q9BZV1	macroautophagy
2.	Vacuolar protein sorting-associated protein 51 homolog	VPS51	Q9UID3	autophagy
3.	Regulatory-associated protein of mTOR	RPTOR	Q8N122	regulation of macroautophagy
				negative regulation of autophagy
4.	Regulatory-associated protein of mTOR	RPTOR	Q8N122	regulation of macroautophagy
				negative regulation of autophagy
5.	Eukaryotic translation initiation factor 4 gamma 1	EIF4G1	Q04637	negative regulation of autophagy
6.	Sorting nexin-32	SNX32	Q86XE0	regulation of macroautophagy
7.	Sorting nexin-32	SNX32	Q86XE0	regulation of macroautophagy
8.	Synaptopodin-2	SYNPO2	Q9UMS6	autophagosome assembly; chaperone-mediated autophagy
9.	Mitofusin-1	MFN1	Q8IWA4	macroautophagy
Table S2(6d). DB4h
	Recommended Protein Name	Gene	UniProt ID	Biological process, molecular function. GO annotation
1.	UBX domain-containing protein 6	UBXN6	Q9BZV1	macroautophagy
2.
3.	Autophagy-related protein 16-2	ATG16L2	Q8NAA4	Autophagy
4.	RB1-inducible coiled-coil protein 1	RB1CC1	Q8TDY2	Autophagy
5.	Reticulophagy regulator 1	RETREG1	Q9H6L5	Autophagy. Endoplasmic reticulum-anchored autophagy receptor that mediates ER delivery into lysosomes through sequestration into autophagosomes
6.	WD repeat domain phosphoinositide-interacting protein 2	WIPI2	Q9Y4P8	Autophagy; protein lipidation involved in autophagosome assembly, protein localization to phagophore assembly site
7.	WD repeat-containing protein 26	WDR26	Q9H7D7	Protects cells by promoting hypoxia-mediated autophagy and mitophagy
8.	Eukaryotic translation initiation factor 4 gamma 1	EIF4G1	Q04637	negative regulation of autophagy, oxidized
9.	Sorting nexin-32	SNX32	Q86XE0	regulation of macroautophagy
10.	Hepatocyte growth factor	HGF	P14210	negative regulation of autophagy
11.	Synaptopodin-2	SYNPO2	Q9UMS6	autophagosome assembly; chaperone-mediated autophagy
12.	Mitofusin-1	MFN1	Q8IWA4	macroautophagy
13.	Rho-associated protein kinase 1	ROCK1	Q13464	positive regulation of autophagy oxidized
14.	Protein associated with UVRAG as autophagy enhancer	RUBCNL	Q9H714	Autophagy; autophagosome maturation; autophagosome-endosome fusion; autophagosome-lysosome fusion
15.	Cathepsin K	CTSK	P43235	autophagy of mitochondrion
16.	Probable E3 ubiquitin-protein ligase HERC1	HERC1	Q15751	negative regulation of autophagy oxidized
17.	Sterol regulatory element-binding protein 2	SREBF2	Q12772	regulation of autophagy of mitochondrion
18.	V-type proton ATPase subunit C 1	ATP6V1C1	P21283	regulation of macroautophagy
19.	Zinc finger FYVE domain-containing protein 1	ZFYVE1	Q9HBF4	macroautophagy oxidized
20.	Elongation factor 1-alpha 2	EEF1A2	Q05639	regulation of chaperone-mediated autophagy
21.	Baculoviral IAP repeat-containing protein 3	BIRC3	Q13489	Protects cells from spontaneous formation of the ripoptosome. negative regulation of necroptotic process
22.	Gasdermin-E	GSDME	O60443	positive regulation of intrinsic apoptotic signaling pathway. Biological process: Necrosis; pyroptosis oxidized

## Sheet: S2(7)
Table S2(7). Ub-proteins related with ER and Golgi organization and function
Table S2(7a). control
	Recommended Protein Name	Gene	UniProt ID	Molecular function, Biological processes, GO annotation
1.	Phospholipase DDHD2	DDHD2	O94830	May be involved in the maintenance of the endoplasmic reticulum and/or Golgi structures. May regulate the transport between Golgi apparatus and plasma membrane
2.	Tyrosine-protein kinase Lyn	LYN	P07948	Golgi apparatus
3.	Golgin subfamily B member 1	GOLGB1	Q14789	endoplasmic reticulum to Golgi vesicle-mediated transport, Golgi organization
4.	General vesicular transport factor p115	USO1	O60763	General vesicular transport factor required for intercisternal transport in the Golgi stack
5.	Protein dopey-2	DOP1B	Q9Y3R5	May be involved in protein traffic between late Golgi and early endosomes
6.	Protein OS-9	OS9	Q13438	Lectin which functions in endoplasmic reticulum (ER) quality control and ER-associated degradation (ERAD). retrograde protein transport, ER to cytosol
7.	Interferon-induced protein with tetratricopeptide repeats 2	IFIT2	P09913	Endoplasmic reticulum
8.	Protein O-mannosyl-transferase	TMTC4	Q5T4D3	protein glycosylation. ER
9.	Nucleotide exchange factor SIL1	SIL1	Q9H173	Required for protein translocation and folding in the ER. Functions as a nucleotide exchange factor for the ER lumenal chaperone HSPA5
10.	Phospholipid-transporting ATPase IB	ATP8A2	Q9NTI2	Golgi apparatus
11.	Ectonucleoside triphosphate diphosphohydrolase 6	ENTPD6	O75354	Might support glycosylation reactions in the Golgi apparatus
12.	Copper-transporting ATPase 2	ATP7B	P35670	Copper ion transmembrane transporter involved in the export of copper out of the cells. Golgi
13.	Dynein regulatory complex subunit 4	GAS8	O95995	microtubule binding. Golgi
14.	CAP-Gly domain-containing linker protein 3	CLIP3	Q96DZ5	Golgi
15.	Endoplasmic reticulum mannosyl-oligosaccharide 1,2-alpha-mannosidase	MAN1B1	Q9UKM7	Endoplasmic reticulum membrane, mannose trimming involved in glycoprotein ERAD pathway, ubiquitin-dependent ERAD pathway
16.	Protein adenylyltransferase FICD	FICD	Q9BVA6	ER. Hsp70 protein binding, response to endoplasmic reticulum stress. response to unfolded protein
17.	Heat shock 70 kDa protein 13	HSPA13	P48723	ER. heat shock protein binding,misfolded protein binding,protein binding involved in protein folding, ubiquitin-dependent ERAD pathway
18.	2-phosphoxylose phosphatase 1	PXYLP1	Q8TE99	glycosaminoglycan biosynthetic process. Golgi
19.	SRSF protein kinase 1	SRPK1	Q96SB4	ER
20.	PDZ domain-containing protein 2	PDZD2	O15018	ER
21.	Zinc transporter SLC39A7	SLC39A7	Q92504	transports Zn2+ from the ER/Golgi apparatus to the cytosol
22.	Pannexin-1	PANX1	Q96RD7	May play a role as a Ca2+-leak channel to regulate ER Ca2+ homeostasis. calcium channel activity; ER
Table S2(7b). DB1h
	Recommended Protein Name	Gene	UniProt ID	Molecular function, Biological processes, localization, GO annotation
1.	Long-chain-fatty-acid--CoA ligase 4	ACSL4	O60488	both synthesis of cellular lipids, and degradation via beta-oxidation.ER
2.	Golgin subfamily B member 1	GOLGB1	Q14789	endoplasmic reticulum to Golgi vesicle-mediated transport, Golgi organization
3.	Cytoplasmic dynein 2 heavy chain 1	DYNC2H1	Q8NCM8	Golgi apparatus, cytoplasmic vesicle and endoplasmic reticulum
4.	Citron Rho-interacting kinase	CIT	O14578	Golgi organization
5.	2'-5'-oligoadenylate synthase 1	OAS1	P00973	ER
6.	UDP-glucuronic acid decarboxylase 1	UXS1	Q8NBZ7	Golgi stack membrane
7.	Ryanodine receptor 2	RYR2	Q92736	Calcium channel that mediates the release of Ca2+ from the sarcoplasmic reticulum into the cytoplasm
8.	Endoplasmic reticulum mannosyl-oligosaccharide 1,2-alpha-mannosidase	MAN1B1	Q9UKM7	Endoplasmic reticulum membrane mannose trimming involved in glycoprotein ERAD pathway, ubiquitin-dependent ERAD pathway
9.	Glycerophosphodiester phosphodiesterase domain-containing protein 5	GDPD5	Q8WTR4	perinuclear endoplasmic reticulum
10.	Divergent protein kinase domain 1A	DIPK1A	Q5T7M9	Endoplasmic reticulum membrane
11.	3-hydroxymethyl-3-methylglutaryl-CoA lyase, cytoplasmic	HMGCLL1	Q8TB92	Endoplasmic reticulum membrane
12.	Microtubule-associated proteins 1A/1B light chain 3C	MAP1LC3C	Q9BXW4	Endomembrane system. protein exit from endoplasmic reticulum
13.	GRAM domain-containing protein 4	GRAMD4	Q6IC98	ER, mitochondrion
14.	Golgin subfamily A member 1	GOLGA1	Q92805	vesicular trafficking at the Golgi apparatus level. Involved in endosome-to-Golgi trafficking
15.	Phosphatidylinositol 4-kinase beta	PI4KB	Q9UBF8	ER, Golgi
16.	Ras-related protein Rab-30	RAB30	Q15771	Required for maintaining the structural integrity of the Golgi apparatus, possibly by mediating interactions with cytoplasmic scaffolding proteins
17.	Inositol 1,4,5-trisphosphate receptor type 2	ITPR2	Q14571	ER
18.	E3 ubiquitin-protein ligase RNF128	RNF128	Q8TEB7	Endomembrane system Partially colocalized with the endoplasmic reticulum resident HSPA5, with Golgi resident STX5, and with the late endosomal GTPase RAB7A
19.	Dolichyl-diphosphooligosaccharide--protein glycosyltransferase subunit 1	RPN1	P04843	protein glycosylation, protein N-linked glycosylation via asparagine. ER
20.	Sulfhydryl oxidase 1	QSOX1	O00391	protein disulfide isomerase activity, cell redox homeostasis. Golgi
21.	Membrane-associated phosphatidylinositol transfer protein 2	PITPNM2	Q9BZ72	Catalyzes the transfer of phosphatidylinositol and phosphatidylcholine between endomembranes endoplasmic reticulum, Golgi apparatus, vesicles and cell membrane and nuclear envelope. Endomembrane system
22.	Glutamate receptor-interacting protein 1	GRIP1	Q9Y3R0	intracellular signal transduction. ER
23.	1-acyl-sn-glycerol-3-phosphate acyltransferase gamma	AGPAT3	Q9NRZ7	Endoplasmic reticulum membrane converts lysophosphatidylinositol (LPI) into phosphatidylinositol
24.	Toll-like receptor 9	TLR9	Q9NR96	Relocalizes from endoplasmic reticulum to endosome and lysosome upon stimulation with agonist. Exit from the ER requires UNC93B1
25.	Protein Aster-B	GRAMD1B	Q3KR37	Cholesterol transporter that mediates non-vesicular transport of cholesterol from the plasma membrane (PM) to the endoplasmic reticulum (ER)
26.	Mitogen-activated protein kinase kinase kinase 4	MAP3K4	Q9Y6R4	Component of a protein kinase signal transduction cascade. Localized in perinuclear vesicular-like structures, probably Golgi-associated vesicles
27.	DnaJ homolog subfamily B member 11	DNAJB11	Q9UBS4	As a co-chaperone for HSPA5 it is required for proper folding, trafficking or degradation of proteins. IRE1-mediated unfolded protein response. ER
Table S2(7c). D4h
	Recommended Protein Name	Gene	UniProt ID	Molecular function, Biological processes, localization, GO annotation
1.	Kelch repeat and BTB domain-containing protein 8	KBTBD8	Q8NFY9	Golgi apparatus
2.	17-beta-hydroxysteroid dehydrogenase type 6	HSD17B6	O14756	NAD-dependent oxidoreductase with broad substrate specificity that shows both oxidative and reductive activity. ER
3.	Inositol 1,4,5-trisphosphate receptor type 2	ITPR2	Q14571	ER
4.	Ryanodine receptor 1	RYR-1	P21817	ER
5.	Ubiquitin carboxyl-terminal hydrolase 32	USP32	Q8NFA0	Golgi apparatus
6.	Vacuolar protein sorting-associated protein 51 homolog	VPS51	Q9UID3	Golgi apparatus
7.	Cytoplasmic dynein 2 heavy chain 1	DYNC2H1	Q8NCM8	May play a role in transport between endoplasmic reticulum and Golgi or organization of the Golgi in cells
8.	Golgin subfamily B member 1	GOLGB1	Q14789	endoplasmic reticulum to Golgi vesicle-mediated transport, Golgi organization
9.	Signal recognition particle subunit SRP68	SRP68	Q9UHB9	endoplasmic reticulum signal peptide binding targeting secretory proteins to the rough endoplasmic reticulum membrane
10.	WD repeat-containing protein 44	WDR44	Q5JSH3	Golgi
11.	Endoplasmin	HSP90B1	P14625	ER. Molecular chaperone that functions in the processing and transport of secreted proteins. ERAD pathway
12.	Alpha-2,8-sialyltransferase 8B	ST8SIA2	Q92186	protein glycosylation, which is part of Protein modification. Golgi apparatus
13.	Protein O-mannosyl-transferase TMTC4	TMTC4	Q5T4D3	protein glycosylation. ER
14.	Protein O-glucosyltransferase 3	POGLUT3	Q7Z4H8 У	protein O-linked glycosylation via serine. Endoplasmic reticulum lumen
15.	60S ribosomal protein L13	RPL13	P26373	endoplasmic reticulum
16.	Peptidyl-prolyl cis-trans isomerase FKBP10	FKBP10	Q96AY3	calcium ion binding, FK506 binding, peptidyl-prolyl cis-trans isomerase activity. ER
17.	Protein TESPA1	TESPA1	A2RU30	May play a role in the regulation of inositol 1,4,5-trisphosphate receptor-mediated Ca2+release and mitochondrial Ca2+ uptake via the mitochondria-associated endoplasmic reticulum membrane (MAM) compartment. ER
18.	DnaJ homolog subfamily B member 11	DNAJB11	Q9UBS4	As a co-chaperone for HSPA5 it is required for proper folding, trafficking or degradation of proteins, IRE1-mediated unfolded protein response. ER
19.	Roundabout homolog 1	ROBO1	Q9Y6N7	Endoplasmic reticulum-Golgi intermediate compartment membrane
20.	Probable phospholipid-transporting ATPase IIA	ATP9A	O75110	retrograde vesicle-mediated transport, Golgi to endoplasmic reticulum. Golgi
21.	Glutamate receptor 1	GRIA1	P42261	ER to Golgi vesicle-mediated transport
22.	Kinesin-like protein KIF13A	KIF13A	Q9H1H9	cargo loading into vesicle, endosome to lysosome transport, Golgi to plasma membrane protein transport
23.	Vesicular integral-membrane protein VIP36	LMAN2	Q12907	Golgi, ER
24.	Golgin subfamily A member 8O	GOLGA8O	A6NCC3	Golgi organization
25.	Coatomer subunit delta	ARCN1	P48444	Component of the coatomer. The coatomer complex is required for budding from Golgi membranes, and is essential for the retrograde Golgi-to-ER transport of dilysine-tagged proteins.
26.	Golgin subfamily A member 4	GOLGA4	Q13439	Involved in vesicular trafficking at the Golgi apparatus level. Involved in endosome-to-Golgi trafficking
27.	Cell migration-inducing and hyaluronan-binding protein	CEMIP	Q8WUJ3	ER retention sequence binding
28.	Dendrin	DDN	O94850	Endoplasmic reticulum membrane
29.	Citron Rho-interacting kinase	CIT	O14578	Golgi organization
30.	Sarcalumenin	SRL	Q86TD4	ER
31.	E3 ubiquitin-protein ligase MARCH4	MARCH4	Q9P2E8	Golgi apparatus membrane
32.	Serine palmitoyltransferase 3	SPTLC3	Q9NUV7	sphingolipid metabolism. ER
33.	Neutral alpha-glucosidase AB	GANAB	Q14697	ER, Golgi. N-glycan metabolism
34.	Thioredoxin-related transmembrane protein 1	TMX1	Q9H3N1	redox reactions through the reversible oxidation of its active center dithiol to a disulfide and catalyze dithiol-disulfide exchange reactions. ER
35.	Fibroblast growth factor receptor substrate 2	FRS2	Q8WU20	Endomembrane system
36.	Kinectin	KTN1	Q86UP2	ER post-translational protein modification
37.	Polycystin-2	PKD2	Q13563	ER, Golgi. voltage-gated potassium &Ca channel activity, release of sequestered calcium ion into cytosol, outward rectifier potassium channel activity, voltage-gated sodium и potassium channel activity
Table S(27d). DB4h
	Recommended Protein Name	Gene	UniProt ID	Molecular function, Biological processes, localization, GO annotation
1.	Ryanodine receptor 1	RYR1	P21817	ER
2.	Glucosidase 2 subunit beta	PRKCSH	P14314	post-translational protein modification. ER
3.	UDP-glucuronosyltransferase 1-6	UGT1A6	P19224	Detoxication. This isoform has specificity for phenols. ER membrane
4.	2'-5'-oligoadenylate synthase 1	OAS1	P00973	ER
5.	Protein bicaudal D homolog 2	BICD 2	Q8TD16	protein localization to Golgi apparatus, regulation of microtubule cytoskeleton organization, retrograde vesicle-mediated transport, Golgi to endoplasmic reticulum. Golgi.
6.	Cytoplasmic dynein 2 heavy chain 1	DYNC2H1	Q8NCM8	Golgi organization
7.	UDP-glucuronosyltransferase 2B4	UGT2B4	P06133	ER membrane, conjugation and subsequent elimination of potentially toxic xenobiotics and endogenous compounds
8.	Consortin	CNST	Q6PJW8	positive regulation of Golgi to plasma membrane protein transport. trans-Golgi network membrane
9.	Vesicle-associated membrane protein-associated protein A	VAPA	Q9P0L0	ER to Golgi vesicle-mediated transport. ER membrane
10.	CMP-sialic acid transporter	SLC35A1	P78382	Transports CMP-sialic acid from the cytosol into Golgi vesicles where glycosyltransferases function, cellular protein modification process. Golgi membrane
11.	Ras-related protein Rab-26	RAB26	Q9ULW5	key regulators of intracellular membrane trafficking, from the formation of transport Golgi vesicles to their fusion with membranes. Golgi apparatus
12.	Coatomer subunit alpha	COPA	P53621	endoplasmic reticulum to Golgi vesicle-mediated transport, retrograde vesicle-mediated transport, Golgi to endoplasmic reticulum, intra-Golgi vesicle-mediated transport
13.	Phospholipid-transporting ATPase IC	ATP8B1	O43520	Golgi organization, ion transmembrane transport
14.	Janus kinase and microtubule-interacting protein 2	JAKMIP2	Q96AA8	Golgi apparatus: kinase binding, microtubule binding
15.	PDZ domain-containing protein 2	PDZD2	O15018	Endoplasmic reticulum
16.	Ras-specific guanine nucleotide-releasing factor 2	RASGRF2	O14827	ER membrane. response to endoplasmic reticulum stress
17.	Nesprin-1	SYNE1	Q8NF91	forms a linking network between organelles and the actin cytoskeleton to maintain the subcellular spatial organization. Golgi organization
18.	Palmitoyltransferase ZDHHC	ZDHHC	Q9H6R6	Endoplasmic reticulum palmitoyl acyltransferase. Palmitoylates calnexin (CALX), which is required for its association with the ribosome-translocon complex and efficient folding of glycosylated proteins
19.	Transmembrane and TPR repeat-containing protein 3 = Protein O-mannosyl-transferase TMTC3	TMTC3	Q6ZXV5	positive regulation of proteasomal protein degradation in the ER, and the control of ER stress response. ER
20.	Reticulophagy regulator 1	RETREG1	Q9H6L5	Endoplasmic reticulum-anchored autophagy receptor that mediates ER delivery into lysosomes through sequestration into autophagosomes. ER membrane, Golgi
21.	25-hydroxycholesterol 7-alpha-hydroxylase	CYP7B1	O75881	ER membrane
22.	Cytochrome P450 2E1	CYP2E1	P05181	ER membrane. Inactivates a number of drugs and xenobiotics. oxidation-reduction process
23.	Fetal and adult testis-expressed transcript protein	FATE1	Q969F0	Involved in the regulation of (ER)-mitochondria coupling. Negatively regulates the ER-mitochondria distance and Ca2+transfer from ER to mitochondria possibly implicating it in the regulation of apoptosis. ER membrane
24.	Polypeptide N-acetylgalactosaminyltransferase 2	GALNT2	Q10471	protein glycosylation. Golgi apparatus. Resides preferentially in the trans and medial parts of the Golgi stack
25.	UDP-glucuronosyltransferase 2B4	UGT2B4	P06133	Endoplasmic reticulum membrane. Essential for the elimination and detoxification of drugs, xenobiotics and endogenous compounds
26.	Glycerophosphodiester phosphodiesterase domain-containing protein 5	GDPD5	Q8WTR4	perinuclear endoplasmic reticulum
27.	Sterol regulatory element-binding protein 2	SREBF2	Q12772	ER membrane, Golgi membrane
28.	DnaJ homolog subfamily C member 3	DNAJC3	Q13217	ER. Involved in the unfolded protein response (UPR) during endoplasmic reticulum (ER) stress
29.	Ubiquitin carboxyl-terminal hydrolase 20	USP20	Q9Y2K6	localizes in the endoplasmic reticulum
30.	Alpha-mannosidase 2	MAN2A1	Q16706	protein glycosylation. Golgi
31.	WD repeat domain phosphoinositide-interacting protein 2	WIPI2	Q9Y4P8	Localizes to omegasomes membranes which are endoplasmic reticulum connected structures at the origin of preautophagosomal structures. Enriched at preautophagosomal structure membranes in response to PtdIns3P
32.	S phase cyclin A-associated protein in the endoplasmic reticulum	SCAPER	Q9BY12	Predominantly located in the ER, only a small portion is detected in the nucleus; Zinc finger
33.	Zinc finger FYVE domain-containing protein 1	ZFYVE1	Q9HBF4	Resides predominantly in the cisternal stacks of the Golgi. Colocalizes with TRIM13 on the perinuclear endoplasmic reticulum
34.	Rho-associated protein kinase 1	ROCK1	Q13464	Golgi
35.	Transmembrane channel-like protein 6	TMC6	Q7Z403	Probable ion channel ER
36.	Copper-transporting ATPase 2	ATP7B	P35670	Copper ion transmembrane transporter involved in the export of copper out of the cells. Golgi
37.	N-alpha-acetyltransferase 35, NatC auxiliary subunit	NAA35	Q5VZE5	Retrograde transport at the Trans-Golgi-Network
38.	Oxysterol-binding protein-related protein 5	OSBPL5	Q9H0X9	ER membrane. Lipid transporter involved in lipid countertransport between the ER and the plasma membrane: Golgi to plasma membrane transport, cholesterol metabolic process
39.	Reticulon-4	RTN4	Q9NQC3	Regulates membrane morphogenesis in the ER by promoting tubular ER production, positive regulation of protein localization to ER
40.	UDP-glucuronic acid decarboxylase 1	UXS1	Q8NBZ7	UDP-alpha-D-xylose biosynthesis. Golgi apparatus
41.	Sterol-4-alpha-carboxylate 3-dehydrogenase, decarboxylating	NSDHL	Q15738	cholesterol biosynthetic process, cholesterol metabolic process, oxidoreductase activity. ER membrane
42.	Myogenesis-regulating glycosidase	MYORG	Q6NSJ0	ER membrane
43.	GPI transamidase component PIG-T	PIGT	Q969N2	glycosylphosphatidylinositol-anchor biosynthesis. ER membrane
44.	Probable E3 ubiquitin-protein ligase HERC1	HERC1	Q15751	Golgi apparatus
45.	Tripartite motif-containing protein 3	TRIM3	O75382	vesicular trafficking via its association with the CART complex. Golgi apparatus
46.	Guanine nucleotide exchange factor DBS	MCF2L	O15068	Endomembrane system. (ER, Golgi, nuclear envelope)
47.	MAP6 domain-containing protein 1	MAP6D1	Q9H9H5	N-terminal peptidyl-L-cysteine N-palmitoylation, Golgi

## Sheet: S2(8)
Table S2(8). Ub-proteins related with transcription and translation
Table S2(8a). Control
	Recommended Protein Name	Gene	UniProt ID	Biological process, molecular function. GO annotation
1.	Elongation factor 1-alpha 1	NTRK3	P68104	Protein biosynthesis, translation. Transcription regulation
2.	ELAV-like protein 1	ELAVL1	Q15717	positive regulation of translation, mRNA stabilization
3.	Eukaryotic translation initiation factor 4 gamma 1	EIF4G1	Q04637	Protein biosynthesis. Translation regulation
4.	RE1-silencing transcription factor	REST	Q13127	Transcriptional repressor.
5.	Zinc finger homeobox protein 3	ZFHX3	Q15911	Transcriptional regulator which can act as an activator or a repressor. Transcription regulation; oxidized
6.	Zinc finger protein 808	ZNF808	Q8N4W9	May be involved in transcriptional regulation.
7.	eIF-2-alpha kinase activator GCN1	GCN1	Q92616	Translation regulation, positive regulation of transcription from RNA polymerase II promoter in response to stress
8.	Zinc finger protein 716	ZNF716	A6NP11	May be involved in transcriptional regulation
9.	Zinc finger protein 354A	ZNF354A	O60765	regulation of transcription by RNA polymerase II
10.	CCR4-NOT transcription complex subunit 3 CNOT3	CNOT3	O75175	Transcription regulation. Translation regulation
11.	Zinc finger protein 253	ZNF253	O75346	negative regulation of transcription, DNA-templated
12.	Zinc finger E-box-binding homeobox 1	ZEB1	P37275	E-box binding transcriptional repressor. chromatin binding, regulation of transcription by RNA polymerase II
13.	Breast cancer type 1 susceptibility protein BRCA1	BRCA1	P38398	Transcription, Transcription regulation
14.	Probable 28S rRNA (cytosine(4447)-C(5))-methyltransferase	NOP2	P46087	RNA binding, regulation of transcription by RNA polymerase II
15.	Zinc finger protein 658B	ZNF658B	Q4V348	May be involved in transcriptional regulation
16.	AT-rich interactive domain-containing protein 2	ARID2	Q68CP9	transcriptional activation and repression of select genes by chromatin remodeling. negative regulation of cell proliferation Transcription. Transcription regulation
17.	Coiled-coil and C2 domain-containing protein 1A	CC2D1A	Q6P1N0	DNA-binding transcription repressor activity, RNA polymerase II-specific
18.	Zinc finger protein 507	ZNF507	Q8TCN5	Transcription. Transcription regulation
19.	Cadherin EGF LAG seven-pass G-type receptor 2	CELSR2	Q9HCU4	regulation of transcription, DNA-templated
20.	Zinc finger and BTB domain-containing protein 4	ZBTB4	Q9P1Z0	Transcriptional repressor with bimodal DNA-binding specificity.
21.	Krueppel-like factor 15	KLF15	Q9UIH9	Transcriptional regulator
22.	Zinc finger protein 229	ZNF229	Q9UJW7	Transcription. Transcription regulation
23.	CCR4-NOT transcription complex subunit 6	CNOT6	Q9ULM6	Transcription. Transcription regulation. Translation regulation
24.	Growth arrest and DNA damage-inducible proteins-interacting protein 1	GADD45GIP1	Q8TAE8	mitochondrial translational elongation
25.	Protein DEK	DEK	P35659	transcription by RNA polymerase II
26.	Host cell factor 1	HCFC1	P51610	activating transcription factor binding
27.	Histone H4	HIST1H4A	P62805	DNA-templated transcription, initiation
28.	Heterogeneous nuclear ribonucleoprotein Q	SYNCRIP	O60506	negative regulation of translation
29.	Splicing factor, suppressor of white-apricot homolog	SFSWAP	Q12872	Transcription. Transcription regulation
30.	Caprin-2	CAPRIN2	Q6IMN6	positive regulation of transcription by RNA polymerase II; negative regulation of translation
31.	Protein NLRC5	NLRC5	Q86WI3	positive regulation of transcription by RNA polymerase II
32.	SEC14-like protein 2	SEC14L2	O76054	Transcription regulation
33.	Little elongation complex subunit 2	ICE2	Q659A1	positive regulation of transcription by RNA polymerase III
34.	Nuclear receptor subfamily 4 group A member 1	NR4A1	P22736	DNA-binding transcription activator activity, RNA polymerase II-specific
35.	YLP motif-containing protein 1	YLPM1	P49750	Transcription regulation Repressor
36.	Eukaryotic translation initiation factor 4 gamma 1	EIF4G1	Q04637	Protein biosynthesis, Translation regulation
37.	Homeobox-containing protein 1	HMBOX1	Q6NT76	DNA-binding transcription factor activity, RNA polymerase II-specific
38.	Zinc finger and SCAN domain-containing protein 18	ZSCAN18	Q8TBC5	Transcription regulation
39.	Probable ATP-dependent RNA helicase DDX17	DDX17	Q92841	RNA helicase, Involved in transcription regulation
40.	Probable helicase senataxin	SETX	Q7Z333	positive regulation of transcription by RNA polymerase II
41.	Zinc finger and BTB domain-containing protein 26	ZBTB26	Q9HCK0	Transcription regulation
42.	Zinc finger and BTB domain-containing protein 40	ZBTB40	Q9NUA8	Transcription regulation
43.	Zinc finger transcription factor Trps1	TRPS1	Q9UHF7	Transcriptional repressor
44.	Myocardin-related transcription factor B	MRTFB	Q9ULH7	Acts as a transcriptional coactivator of serum response factor (SRF)
45.	Histone deacetylase 5	HDAC5	Q9UQL6	important role in transcriptional regulation
46.	RNA-binding protein FUS	FUS	P35637	DNA/RNA-binding protein, a role in transcription regulation,
47.	Poly [ADP-ribose] polymerase 1	PARP1	P09874	Transcription regulation
48.	DNA-dependent protein kinase catalytic subunit	PRKDC	P78527	transcription factor binding
49.	N-alpha-acetyltransferase 16, NatA auxiliary subunit	NAA16	Q6N069	positive regulation of transcription, DNA-templated
50.	DNA polymerase delta subunit 3	POLD3	Q15054	transcription-coupled nucleotide-excision repair
51.	Proteasome subunit beta type-11	PSMB11	A5LHX3	regulation of transcription from RNA polymerase II promoter in response to hypoxia
52.	Ataxin-7	ATXN7	O15265	Transcription regulation
53.	Lysine-specific demethylase	PHF2	O75151	Transcription regulation
54.	Tyrosine-protein kinase ABL1	ABL1	P00519	regulation of transcription, DNA-templated
55.	Junction plakoglobin	JUP	P14923	transcription coactivator activity
56.	Lysine-specific demethylase 5A	KDM5A	P29375	Transcription regulation
57.	GRB10-interacting GYF protein 2	GIGYF2	Q6Y7W6	negative regulation of translation
58.	Staphylococcal nuclease domain-containing protein 1	SND1	Q7KZF4	transcription coregulator activity
59.	Insulin-like growth factor 2 mRNA-binding protein 1	IGF2BP1	Q9NZI8	translation regulator activity
60.	Histone H4	HIST1H4A	P62805	DNA-templated transcription, initiation
Table S2(8b). DB1h
	Recommended Protein Name	Gene	UniProt ID	Biological process, molecular function. GO annotation
1.	ELAV-like protein 1	ELAVL1	Q15717	positive regulation of translation, mRNA stabilization
2.	Elongin-A3 member D	ELOA3D	A6NLF2	a general transcription elongation factor regulation of transcription by RNA polymerase II
3.	Transcription elongation regulator 1	TCERG1	O14776	Transcription. Transcription regulation
4.	Polyadenylate-binding protein 1	PABPC1	P11940	translational initiation
5.	Isoleucine-tRNA ligase, cytoplasmic	IARS	P41252	Protein biosynthesis
6.	Nuclear pore complex protein Nup98-Nup96	NUP98	P52948	role in transcription and alternative splicing activation
7.	Gem-associated protein 5	GEMIN5	Q8TEQ6	Protein biosynthesis. Translation regulation
8.	Zinc finger protein 592	ZNF592	Q92610	Transcription. Transcription regulation
9.	Integrator complex subunit 9	INTS9	Q9NV88	snRNA transcription by RNA polymerase II
10.	39S ribosomal protein L16, mitochondrial	MRPL16	Q9NX20	mitochondrial translational elongation
11.	Little elongation complex subunit 1	ICE1	Q9Y2F5	Transcription.Transcription regulation
12.	Myelin transcription factor1	MYT1	Q01538	DNA-binding transcription activator activity, RNA polymerase II-specific
13.	39S ribosomal protein L1, mitochondrial	MRPL16	Q9BYD6	mitochondrial translational elongation& termination
14.	60S ribosomal protein L26	RPL26	P61254	positive regulation of translation
15.	Securin	PTTG1	O95997	DNA-binding transcription factor activity
16.	DNA-dependent protein kinase catalytic subunit	PRKDC	P78527	involved in modulation of transcription
17.	Retinoblastoma-like protein 1	RBL1	P28749	RNA polymerase II activating transcription factor binding
18.	Leucine-rich PPR motif-containing protein, mitochondrial	LRPPRC	P42704	Transcription regulation
19.	F-box only protein 5	FBXO5	Q9UKT4	regulation of transcription involved in G1/S transition of mitotic cell cycle
20.	Histone H4	HIST1H4A	P62805	DNA-templated transcription, initiation
21.	Histone H4	HIST1H4A	P62805	DNA-templated transcription, initiation
22.	Histone H4	HIST1H4A	P62805	DNA-templated transcription, initiation
23.	Little elongation complex subunit 2	ICE2	Q659A1	positive regulation of transcription by RNA polymerase III
24.	Doublesex- and mab-3-related transcription factor C2	DMRTC2	Q8IXT2	Transcription. Transcription regulation
25.	LIM domain-containing protein ajuba	AJUBA	Q96IF1	Transcription
26.	60S ribosomal protein L26	RPL26	P61254	positive regulation of translation. translational initiation; translational initiation
27.	PHD finger protein 14	PHF14	O94880	negative regulation of transcription by RNA polymerase II
28.	Zinc finger protein 469	ZNF469	Q96JG9	Transcription regulation
29.	Homeobox protein Hox-B13	HOXB13	Q92826	Sequence-specific transcription factor
30.	Steroidogenic factor 1	NR5A1	Q13285	Transcriptional activator
31.	Zinc finger and BTB domain-containing protein 2	ZBTB2	Q8N680	Transcription regulation
32.	Zinc finger protein 202	ZNF202	O95125	Transcriptional repressor
33.	Histone-lysine N-methyltransferase NSD3	NSD3	Q9BZ95	histone methylation, positive regulation of transcription, DNA-templated
34.	Histone lysine demethylase PHF8	PHF8	Q9UPP1	rDNA transcription
35.	Putative zinc finger and SCAN domain-containing protein 5C	ZSCAN5C	A6NGD5	May be involved in transcriptional regulation. DNA-binding transcription factor activity, RNA polymerase II-specific
36.	Valine-tRNA ligase	VARS	P26640	tRNA aminoacylation for protein translation
37.	SAM pointed domain-containing Ets transcription factor	SPDEF	O95238	DNA-binding transcription factor activity, RNA polymerase II-specific
38.	RNA-binding protein FUS	FUS	P35637	DNA/RNA-binding protein, plays a role in transcription regulation, RNA splicing, RNA transport
39.	Nucleoprotein TPR	TPR	P12270	negative regulation of translational initiation, negative regulation of transcription by RNA polymerase II tubulin binding
40.	Integrin alpha-6	ITGA6	P23229	positive regulation of transcription by RNA polymerase II
41.	39S ribosomal protein L15, mitochondrial	MRPL15	Q9P015	mitochondrial translational elongation
42.	Steroidogenic factor 1	NR5A1	Q13285	Transcriptional activator. Transcription. Transcription regulation
43.	Glutamate receptor-interacting protein 1	GRIP1	Q9Y3R0	positive regulation of transcription, DNA-templated
44.	Zinc finger MYM-type protein 4	ZMYM4	Q5VZL5	regulation of transcription by RNA polymerase II
45.	Activity-dependent neuroprotector homeobox protein 2	ADNP2	Q6IQ32	May be involved in transcriptional regulation
46.	Toll-like receptor 9	TLR9	Q9NR96	positive regulation of transcription by RNA polymerase II
Table S2(8c). D4h
	Recommended Protein Name	Gene	UniProt ID	Biological process, molecular function. GO annotation
1.	ELAV-like protein 1	ELAVL1	Q15717	positive regulation of translation, mRNA stabilization
2.	LIM domain-containing protein ajuba	AJUBA	Q96IF1	Transcription
3.	LIM domain-containing protein ajuba	AJUBA	Q96IF1	Transcription
4.	Eukaryotic translation initiation factor 4 gamma 1	EIF4G1	Q04637	Protein biosynthesis. Translation regulation
5.	Cullin-associated NEDD8-dissociated protein 1	CAND1	Q86VP6	positive regulation of RNA polymerase II transcriptional preinitiation complex assembly
6.	Cullin-associated NEDD8-dissociated protein 1	CAND1	Q86VP6	positive regulation of RNA polymerase II transcriptional preinitiation complex assembly
7.	60S ribosomal protein L13	RPL13	P26373	translation
8.	Homeobox protein orthopedia	OTP	Q5XKR4	Transcription. Transcription regulation
9.	General transcription factor II-I repeat domain-containing protein 2B	GTF2IRD2B	Q6EKJ0	DNA binding. Transcription. Transcription regulation
10.	DNA-directed RNA polymerase I subunit RPA1	POLR1A	O95602	Transcription
11.	ATP-binding cassette sub-family F member 1	ABCF1	Q8NE71	positive regulation of translation
12.	Transcription factor IIIA (TFIIIA)	GTF3A	Q92664	DNA-binding transcription factor activity, RNA polymerase II-specific. Transcription
13.	Zinc finger and BTB domain-containing protein 6	ZBTB6	Q15916	May be involved in transcriptional regulation
14.	N-alpha-acetyltransferase 15, NatA auxiliary subunit	NAA15	Q9BXJ9	positive regulation of transcription, DNA-templated
15.	Interleukin-17A	IL17	Q16552	positive regulation of transcription by RNA polymerase II
16.	Kelch repeat and BTB domain-containing protein 8	ZBTB8	Q8NFY9	Translation regulation
17.	Transcription factor SOX-5	SOX5	P35711	DNA-binding transcription factor activity, RNA polymerase II-specific
18.	eIF-2-alpha kinase activator GCN1	GCN1	Q92616	positive activator of the EIF2AK4/GCN2 protein kinase activity. Translation regulation, positive regulation of transcription from RNA polymerase II promoter in response to stress
19.	Elongin-A3 member D	ELOA3D	A6NLF2	a general transcription elongation factor regulation of transcription by RNA polymerase II
20.	Storkhead-box protein 2	STOX2	Q9P2F5	regulation of transcription by RNA polymerase II
21.	Protein mono-ADP-ribosyltransferase	PARP9	Q8IXQ6	positive regulation of transcription, DNA-templated, negative regulation of transcription by RNA polymerase II
22.	Myelin transcription factor1	MYT1	Q01538	DNA-binding transcription activator activity, RNA polymerase II-specific
23.	Probable helicase senataxin	SETX	Q7Z333	transcription regulation
24.	Myocyte-specific enhancer factor 2D	MEF2D	Q14814	Transcription regulation
25.	Homeobox protein Hox-A4	HOXA4	Q00056	DNA-binding transcription activator activity, RNA polymerase II-specific
26.	Rhombotin-2	LMO2	P25791	DNA-binding transcription activator activity, RNA polymerase II-specific
27.	Zinc finger protein 646	ZNF646	O15015	Transcription
28.	Zinc finger protein 865	ZNF865	P0CJ78	Transcription. Transcription regulation
29.	RING finger protein unkempt homolog	UNK	Q9C0B0	negative regulation of cytoplasmic translation
30.	Cell cycle and apoptosis regulator protein 2	CCAR2	Q8N163	Transcription regulation
31.	ATPase family AAA domain-containing protein 2B	ATAD2B	Q9ULI0	positive regulation of transcription by RNA polymerase II
32.	Zinc finger imprinted 2	ZIM2	Q9NZV7	Transcription. Transcription regulation
33.	Receptor of activated protein C kinase 1	RACK1	P63244	negative regulation of endoplasmic reticulum unfolded protein response and translation
34.	ATP-binding cassette sub-family F member 1	ABCF1	Q8NE71	positive regulation of translation
35.	SNW domain-containing protein 1	SNW1	Q13573	negative regulation of transcription, DNA-templated
36.	Fibroblast growth factor 4	FGF4	P08620	positive regulation of transcription by RNA polymerase II
37.	Histone-lysine N-methyltransferase ASH1L	ASH1L	Q9NR48	Transcription regulation
38.	Histone-lysine N-methyltransferase PRDM9	PRDM9	Q9NQV7	chromatin DNA binding, histone-lysine N-methyltransferase activity DNA-binding transcription factor activity, RNA polymerase II-specific
39.	Doublesex- and mab-3-related transcription factor C2	DMRTC2	Q8IXT2	Transcription. Transcription regulation
40.	Visual system homeobox 2	VSX2	P58304	DNA-binding transcription factor activity, RNA polymerase II-specific
41.	Zinc finger protein GLIS3	GLIS3	Q8NEA6	both a repressor and activator of transcription
42.	Zinc finger protein 576	ZNF576	Q9H609	transcription
43.	Bifunctional glutamate/proline--tRNA ligase	ERPS	P07814	negative regulation of translation
44.	Eukaryotic translation initiation factor 4E transporter	EIF4ENIF1	Q9NRA8	inhibits translation initiation. negative regulation of translation
45.	Histone deacetylase 9	HDAC9	Q9UKV0	transcription factor binding
46.	Zinc finger protein 334	ZNF334	Q9HCZ1	Transcription regulation
47.	Dendrin	DDN	O94850	positive regulation of transcription by RNA polymerase II
48.	Zinc finger protein 518A	ZNF518A	Q6AHZ1	Transcription regulation
49.	Nuclear receptor subfamily 2 group E member 1	NR2E1	Q9Y466	DNA-binding transcription activator activity, RNA polymerase II-specific
50.	Ras-responsive element-binding protein 1	RREB1	Q92766	Transcription, Transcription regulation
51.	Zinc finger protein 717	ZNF717	Q9BY31	Transcription regulation
52.	SET-binding protein	SETBP1	Q9Y6X0	DNA-binding transcription factor activity, RNA polymerase II-specific
53.	LIM domain only protein 7	LMO7	Q8WWI1	DNA-binding transcription factor activity
54.	39S ribosomal protein L39, mitochondrial	MRPL39	Q9NYK5	mitochondrial translational elongation
55.	Pre-B-cell leukemia transcription factor-interacting protein 1	PBXIP1	Q96AQ6	transcription corepressor activity
56.	Zinc finger protein 318	ZNF318	Q5VUA4	Transcription. Transcription regulation
57.	Poly [ADP-ribose] polymerase 1	PARP1	P09874	Transcription. Transcription regulation
58.	Lysine-specific demethylase 4D	KDM4D	Q6B0I6	Transcription. Transcription regulation
59.	RNA-binding protein FUS	FUS	P35637	transcription regulation
60.	Transcriptional coactivator YAP1	YAP1	P46937	Plays a key role to control cell proliferation in response to cell contact
61.	Histone-lysine N-methyltransferase SETD1A	SETD1A	O15047	Transcription regulation
62.	Sentrin-specific protease 3	SENP3	Q9H4L4	transcriptional activation capability
63.	Regulatory-associated protein of mTOR	RPTOR	Q8N122	positive regulation of transcription by RNA polymerase III
64.	Regulatory-associated protein of mTOR	RPTOR	Q8N122	positive regulation of transcription by RNA polymerase III
65.	Lumican	LUM	P51884	positive regulation of transcription by RNA polymerase II
66.	Iron-responsive element-binding protein 2	IREB2	P48200	translation repressor activity. negative regulation of translation.
67.	Probable 28S rRNA (cytosine(4447)-C(5))-methyltransferase	NOP2	P46087	regulation of transcription by RNA polymerase II
68.	Threonine-tRNA ligase, mitochondrial	TARS2	Q9BW92	Protein biosynthesis
69.	Serrate RNA effector molecule homolog	SRRT	Q9BXP5	regulation of transcription, DNA-templated
Table S2(8d). DB4h
	Recommended Protein Name	Gene	UniProt ID	Biological process, molecular function. GO annotation
1.	ELAV-like protein 1	ELAVL1	Q15717	positive regulation of translation, mRNA stabilization
2.	ELAV-like protein 1	ELAVL1	Q15717	positive regulation of translation, mRNA stabilization
3.	Eukaryotic translation initiation factor 4 gamma 1	EIF4G1	Q04637	Protein biosynthesis. Translation regulation
4.	Programmed cell death protein 4	PDCD4	Q53EL6	Inhibits translation initiation and cap-dependent translation. negative regulation of transcription, DNA-templated
5.	Homeobox protein orthopedia	OTP	Q5XKR4	Transcription. Transcription regulation
6.	60S ribosomal protein L26	RPL26	P61254	positive regulation of translation
7.	ATP-binding cassette sub-family F member 1	ABCF1	Q8NE71	positive regulation of translation
8.	N-alpha-acetyltransferase 15, NatA auxiliary subunit	NAA15	Q9BXJ9	positive regulation of transcription, DNA-templated
9.	Cell cycle and apoptosis regulator protein 2	CCAR2	Q8N163	integrates transcript elongation with the regulation of alternative splicing. Transcription regulation
10.	39S ribosomal protein L16, mitochondrial	MRPL16	Q9NX20	mitochondrial translational elongation
11.	eIF-2-alpha kinase activator GCN1	GCN1	Q92616	Translation regulation, positive regulation of transcription from RNA polymerase II promoter in response to stress
12.	Protein argonaute-2	AGO2	Q9UKV8	translation initiation factor activity. May inhibit translation. positive regulation of transcription by RNA polymerase II
13.	DNA-directed RNA polymerase II subunit RPB1	POLR2A	P24928	catalyzes the transcription of DNA to synthesize precursors of mRNA and most snRNA and microRNA
14.	Cysteine/serine-rich nuclear protein 2	CSRNP2	Q9H175	Transcription. Transcription regulation
15.	Proliferation-associated protein 2G4	PA2G4	Q9UQ80	Transcription.Transcription regulation. Translation regulation
16.	DNA topoisomerase 2-alpha	TOP2A	P11388	positive regulation of transcription by RNA polymerase II
17.	RE1-silencing transcription factor	REST	Q13127	Transcriptional repressor
18.	Zinc finger homeobox protein 3	ZFHX3	Q15911	Transcriptional regulator which can act as an activator or a repressor
19.	Zinc finger protein 808	ZNF808	Q8N4W9	May be involved in transcriptional regulation
20.	Zinc finger protein 141	ZNF141	Q15928	Transcription. Transcription regulation (repressor)
21.	Zinc finger protein 189	ZNF189	O75820	DNA-binding transcription factor activity
22.	CCR4-NOT transcription complex subunit 2	CNOT2	Q9NZN8	Transcription regulation. Translation regulation
23.	Zinc finger protein ENSP00000375192	N/A	Q8WTZ3	DNA binding. Transcription regulation
24.	Eukaryotic translation initiation factor 4B	EIF4B	P23588	regulation of translational initiation. Protein biosynthesis
25.	Chromodomain-helicase-DNA-binding protein 7	CHD7	Q9P2D1	positive regulation of transcription by RNA polymerase II
26.	Methyl-CpG-binding domain protein 1	MBD1	Q9UIS9	Transcriptional regulation
27.	Zinc finger protein 439	ZNF439	Q8NDP4	Transcription regulation; oxidized
28.	Zinc finger protein 37A	ZNF37A	P17032	May be involved in transcriptional regulation
29.	AT-rich interactive domain-containing protein 5B	ARID5B	Q14865	Transcription coactivator that binds to the 5'-AATA[CT]-3' core sequence
30.	eIF-2-alpha kinase GCN2	GCN2	Q9P2K8	eukaryotic translation initiation factor 2alpha kinase activity. negative regulation of translational initiation in response to stress
31.	Protein strawberry notch homolog 1	SBNO1	A3KN83	regulation of transcription, DNA-templated
32.	Zinc finger protein 583	ZNF583	Q96ND8	Transcription regulation
33.	Transcription factor E2F2	E2F2	Q14209	DNA-binding transcription activator activity, RNA polymerase II-specific
34.	Cysteine-tRNA ligase, cytoplasmic	CARS	P49589	Protein biosynthesis
35.	Nuclear receptor-interacting protein 1	NRIP1	P48552	Transcription regulation
36.	Zinc finger protein 512B	ZNF512B	Q96KM6	Transcription regulation
37.	Protein odd-skipped-related 1	OSR1	Q8TAX0	Transcription regulation, negative regulation of sodium ion transmembrane transporter activity
38.	Eukaryotic translation initiation factor 4 gamma 3	EIF4G3	O43432	Thought to be a functional homolog of EIF4G1
39.	Ankyrin repeat domain-containing protein 30A	ANKRD30A	Q9BXX3	regulation of transcription, DNA-templated
40.	Protein lin-9 homolog	LIN9	Q5TKA1	Acts as a tumor suppressor. Inhibits DNA synthesis. transcription, DNA-templated
41.	Zinc finger protein 485	ZNF485	Q8NCK3	Transcription regulation
42.	Transcription factor 20	TCF20	Q9UGU0	RNA, metal, DNA binding
43.	RNA polymerase I-specific transcription initiation factor RRN3	RRN3	Q9NYV6	Required for efficient transcription initiation by RNA polymerase I
44.	Transcription factor SOX-1	SOX1	O00570	Transcriptional activator
45.	Zinc finger protein 28	ZNF28	P17035	May be involved in transcriptional regulation
46.	Zinc finger protein 519	ZNF519	Q8TB69	May be involved in transcriptional regulation
47.	RNA polymerase II elongation factor ELL2	ELL2	O00472	Transcription. Transcription regulation
48.	Translation initiation factor eIF-2B subunit alpha	EIF2B1	Q14232	translational initiation
49.	Zinc finger protein 316	ZNF316	A6NFI3	May be involved in transcriptional regulation
50.	Homeobox and leucine zipper protein Homez	Homez	Q8IX15	May function as a transcriptional regulator
51.	Zinc finger protein 708	ZNF708	P17019	May be involved in transcriptional regulation
52.	Zinc finger protein 624	ZNF624	Q9P2J8	May be involved in transcriptional regulation; oxidized
53.	Phospholipid-transporting ATPase IC	ATP8B1	O43520	negative regulation of transcription, DNA-templated
54.	DNA-dependent protein kinase catalytic subunit	PRKDC	P78527	involved in modulation of transcription
55.	DNA methyltransferase 1-associated protein 1	DMAP1	Q9NPF5	transcription corepressor activity
56.	RB1-inducible coiled-coil protein 1	RB1CC1	Q8TDY2	Transcription. Transcription regulation
57.	Histone-lysine N-methyltransferase, H3 lysine-79 specific	DOT1L	Q8TEK3	positive regulation of transcription by RNA polymerase II
58.	Histone-lysine N-methyltransferase EZH2	EZH2	Q15910	regulation of transcription, DNA-templated
59.	Histone-lysine N-methyltransferase SETDB1	SETDB1	Q15047	Transcription regulation
60.	Histone-lysine N-methyltransferase SETD2	SETD2	Q9BYW2	Transcription
61.	Histone-lysine N-methyltransferase 2C	KMT2C	Q8NEZ4	Transcription regulation
62.	N6-adenosine-methyltransferase catalytic subunit	METTL3	Q86U44	positive regulation of cap-independent translational initiation
63.	Sterol regulatory element-binding protein 2	SREBF2	Q12772	Transcriptional activator required for lipid homeostasis
64.	Interleukin-31 receptor subunit alpha	IL31RA	Q8NI17	positive regulation of transcription, DNA-templated
65.	Wilms tumor protein WT1	WT1	P19544	regulation of transcription, DNA-templated; negative regulation of translation
66.	Calcium/calmodulin-dependent protein kinase type IV	SRRT	Q16566	positive regulation of transcription, DNA-templated
67.	Cell division cycle 5-like protein	CDC5L	Q99459	transcription activator
68.	Mediator of RNA polymerase II transcription subunit 1	MED1	Q15648	Transcription regulation
69.	DnaJ homolog subfamily C member 3	DNAJC3	Q13217	positive regulation of translation initiation in response to endoplasmic reticulum stress
70.	Ubiquitin carboxyl-terminal hydrolase isozyme L5	UCHL5	Q9Y5K5	Transcription regulation
71.	YEATS domain-containing protein 2	YEATS2	Q9ULM3	DNA-binding transcription factor activity, RNA polymerase II-specific
72.	RNA-binding motif, single-stranded-interacting protein 3	RBMS3	Q6XE24	positive regulation of translation
73.	Neurite extension and migration factor	NEXMIF	Q5QGS0	Transcription regulation
74.	Rho GTPase-activating protein 35	ARHGAP35	Q9NRY4	Transcription regulation regulation of small GTPase mediated signal transduction
75.	Actin-like protein 6B	ACTL6B	O94805	regulation of transcription by RNA polymerase II
76.	Actin filament-associated protein 1-like 2	AFAP1L2	Q8N4X5	positive regulation of transcription, DNA-templated
77.	Cullin-associated NEDD8-dissociated protein 2	CAND2	O75155	positive regulation of transcription, DNA-templated, Transcription
78.	Protein AF-9	MLLT3	P42568	DNA-binding transcription factor activity, RNA polymerase II-specific. Transcription regulation
79.	Protein-tyrosine kinase 2-beta	PTK2B	Q14289	positive regulation of translation
80.	Serine/threonine-protein kinase	NLK	Q9UBE8	Transcription regulation
81.	Nuclear receptor subfamily 4 group A member 1	NR4A1	P22736	DNA-binding transcription activator activity, RNA polymerase II-specific
82.	Visual system homeobox 2	VSX2	P58304	DNA-binding transcription factor activity, RNA polymerase II-specific
83.	Zinc finger protein Helios	IKZF2	Q9UKS7	DNA-binding transcription factor activity
84.	Zinc finger protein 507	ZNF507	Q8TCN5	May be involved in transcriptional regulation; oxidized
85.	Zinc finger protein 844	ZNF844	Q08AG5	Transcription regulation
86.	Piwi-like protein 1	PIWIL1	Q96J94	regulation of translation
87.	RuvB-like 1	RUVBL1	Q9Y265	Transcription regulation
88.	Poly [ADP-ribose] polymerase 1	PARP1	P09874	Transcription regulation
89.	Protein mono-ADP-ribosyltransferase PARP9	PARP9	Q8IXQ6	transcription corepressor activity. negative regulation of transcription by RNA polymerase II
90.	Protein mono-ADP-ribosyltransferase PARP15	PARP15	Q460N3	Transcription regulation
91.	Zinc finger protein 44	ZNF44	P15621	Transcription regulation
92.	RNA exonuclease 4	REXO4	Q9GZR2	regulation of transcription, DNA-templated
93.	Zinc finger protein 865	ZNF865	P0CJ78	Transcription regulation
94.	Elongation factor 1-alpha 2	EEF1A2	Q05639	translation factor activity, RNA binding
95.	Ribosomal protein S6 kinase beta-1	RPS6KB1	P23443	Regulates protein synthesis through phosphorylation of EIF4B, RPS6 and EEF2K
96.	Tyrosine-protein kinase BAZ1B	BAZ1B	Q9UIG0	Transcription regulation
97.	Hepatocyte growth factor	HGF	P14210	positive regulation of DNA biosynthetic process positive regulation of transcription by RNA polymerase II
98.	Retinoblastoma-binding protein 5	RBBP5	Q15291	histone-lysine N-methyltransferase activity, transcription regulatory region DNA binding
99.	Lysine-specific demethylase 4D	KDM4D	Q6B0I6	Transcription regulation
100.	RNA-binding protein FUS	FUS	P35637	transcription regulation
101.	Fanconi anemia group J protein	BRIP1	Q9BX63	regulation of transcription by RNA polymerase II
102.	Neurogenic differentiation factor 2	NEUROD2	Q15784	Transcriptional regulator
103.	Diacylglycerol kinase theta	DGKQ	P52824	regulation of transcription by RNA polymerase II
104.	Transcription termination factor 2	TTF2	Q9UNY4	May contribute to mitotic transcription repression. termination of RNA polymerase II transcription. DNA-templated transcription, termination
105.	E3 ubiquitin-protein ligase BRE1A	RNF20	Q5VTR2	transcription coactivator activity. regulation of transcription, DNA-templated
106.	Sentrin-specif protease 1	SENP1	Q9P0U3	positive regulation of transcription by RNA polymerase II
107.	Deubiquitinase MYSM1	MYSM1	Q5VVJ2	Transcription regulation, Ubl conjugation pathway
108.	Protein Wiz	WIZ	O95785	DNA-binding transcription factor activity, RNA polymerase II-specific
109.	Ezrin	EZR	P15311	negative regulation of transcription by RNA polymerase II
110.	Pre-mRNA-processing factor 6	PRPF6	O94906	mRNA processing, mRNA splicing positive regulation of transcription by RNA polymerase II
111.	Protein ZGRF1 (GRF-type zinc finger domain-containing protein 1)	ZGRF1	Q86YA3	RNA binding; oxidized
112.	Telomere zinc finger-associated protein	ZBTB48	P10074	positive regulation of transcription, DNA-templated

## Sheet: S2(9)
Table S2(9). Ub-proteins of UPR, ERAD, UBL-conjugation and protein ubiquitination pathways ("folding&ubiquitination" group)
Table S2(9a). Control		6 oxidized proteins
	Recommended Protein Name	Gene	UniProt ID	Functions, biological process. GO annotation
1.	Breast cancer type 1 susceptibility protein	BRCA1	P38398	act as E3 ubiquitin-protein ligase. Cell cycle, DNA damage, DNA recombination, DNA repair, Transcription regulation, Ubl conjugation pathway. Autoubiquitinated, undergoes 'Lys-6'-linked polyubiquitination (does not promote degradation). Nucleus, cytoplasm. Zinc-finger (RING)
2.	E3 ubiquitin-protein ligase RAD18	RAD18	Q9NS91	DNA damage, DNA repair, Ubl conjugation pathway. protein ubiquitination. protein autoubiquitination. Nucleus, cytoskeleton. Zinc-finger (RING)
3.	E3 ubiquitin-protein ligase DZIP3	DZIP3	Q86Y13	protein polyubiquitination. Ubl conjugation pathway. Zinc-finger (RING)
4.	(E2-independent) E3 ubiquitin-conjugating enzyme FATS	C10orf90	Q96M02	protein polyubiquitination. Ubl conjugation pathway. Tumor suppressor that is required to sustain G2/M checkpoint after DNA damage. Cytoskeleton, cytoplasm
5.	Stress-70 protein, mitochondrial	HSPA9	P38646	unfolded protein binding Oxidized
6.	Heat shock 70 kDa protein 1A	HSPA1A	P0DMV8	UPR, positive regulation of proteasomal ubiquitin-dependent protein catabolic process, negative regulation of protein ubiquitination, cellular response to unfolded protein
7.	Aryl-hydrocarbon-interacting protein-like 1	AIPL1	Q9NZN9	UPR, unfolded protein binding
8.	Kelch-like protein 36	KLHL36	Q8N4N3	Ubl conjugation pathway
9.	DDB1- and CUL4-associated factor 10	DCAF10	Q5QP82	protein ubiquitination, Ubl conjugation pathwayOxidized
10.	Nucleotide exchange factor SIL1	SIL1	Q9H173	unfolded protein binding
11.	BTB/POZ domain-containing protein 1	BTBD1	Q9H0C5	Ubl conjugation pathway Oxidized
12.	Protein OS-9	OS9	Q13438	protein ubiquitination, Ubl conjugation pathway Oxidized
13.	Endoplasmic reticulum mannosyl-oligosaccharide 1,2-alpha-mannosidase (ER mannosidase 1)	MAN1B1	Q9UKM7	Glycosylation, ERAD, glycoprotein quality control, mannose trimming involved in glycoprotein ERAD pathway, ubiquitin-dependent ERAD pathway
14.	Protein adenylyltransferase FICD	FICD	Q9BVA6	UPR Oxidized
15.	Proteasome subunit beta type-11	PSMB11	A5LHX3	Protease. Threonine protease. Oxidized
16.	DDB1- and CUL4-associated factor 7	DCAF7	P61962	Ubl conjugation pathway, protein ubiquitination
17.	F-box only protein 4	FBXO4	Q9UKT5	Ubl conjugation pathway protein ubiquitination
18.	Polyubiquitin-B	UBB	P0CG47	positive regulation of protein ubiquitination
19.	Puromycin-sensitive aminopeptidase	NPEPPS	P55786	protein polyubiquitination
Table S2(9b). DB1h		2 oxidized protein
	Recommended Protein Name	Gene	UniProt ID	Functions, biological process. GO annotation
1.	E3 ubiquitin-protein ligase MIB1	MIB1	Q86YT6	Ubl conjugation pathway. Cytoplasm, cytoskeleton, PM.
				Zinc-finger (RING, ZZ)
2.	E3 ubiquitin-protein ligase RNF128	RNF128	Q8TEB7	protein deubiquitination. ubiquitin-dependent protein catabolic process. Ubl conjugation pathway. Cytoskeleton, endomembranes. Auto-ubiquitinated. Zinc-finger (RING). Partially colocalized with the endoplasmic reticulum resident HSPA5, with Golgi resident STX5, and with the late endosomal GTPase RAB7A
3.	BRCA1-associated RING domain protein 1	BARD1	Q99728	act as E3 ubiquitin-protein ligase. DNA damage, DNA repair, Ubl conjugation pathway. protein ubiquitination and deubiquitination. Processed during apoptosis. Nucleus. Zinc-finger (RING) Oxidized
4.	Stress-70 protein, mitochondrial	HSPA9	P38646	unfolded protein binding Oxidized
5.	Heat shock 70 kDa protein 1-like	HSPA1L	P34931	un/misfolded protein binding
6.	Polyubiquitin-B	UBB	P0CG47	positive regulation of protein ubiquitination
7.	Polyubiquitin-B	UBB	P0CG47	positive regulation of protein ubiquitination
8.	Endoplasmic reticulum mannosyl-oligosaccharide 1,2-alpha-mannosidase (ER mannosidase 1)	MAN1B1	Q9UKM7	ERAD, glycoprotein quality control, mannose trimming involved in glycoprotein ERAD pathway, ubiquitin-dependent ERAD pathway
9.	DNA-dependent protein kinase catalytic subunit	PRKDC	P78527	Ubl conjugation pathway, protein ubiquitination
10.	Microtubule-associated proteins 1A/1B light chain 3C	MAP1LC3C	Q9BXW4	Ubl conjugation pathway
11.	F-box only protein 5	FBXO5	Q9UKT4	Ubiquitination; Ubl conjugation pathway
12.	F-box only protein 4	FBXO4	Q9UKT5	protein ubiquitination.
				Ubl conjugation pathway
13.	Midasin	MDN1	Q9NU22	UPR. Chaperone, unfolded protein binding
14.	DnaJ homolog subfamily B member 11	DNAJB11	Q9UBS4	Chaperone, protein folding, IRE1-mediated unfolded protein response
15.	Prostaglandin E synthase 3	PTGES3	Q15185	unfolded protein binding
16.	Cullin-1	CUL1	Q13616	Ubl conjugation pathway
17.	F-box only protein 4	FBXO4	Q9UKT5	Ubl conjugation pathway
18.	Tubulin-specific chaperone C	TBCC	Q15814	protein folding
19.	Pre-mRNA-processing-splicing factor 8	PRPF8	Q6P2Q9	K63-linked polyubiquitin modification-dependent protein binding
Table S2(9c). D4h		1 oxidized protein
	Recommended Protein Name	Gene	UniProt ID	Functions, biological process. GO annotation
1.	E3 ubiquitin-protein ligase UBR5	UBR5	O95071	DNA damage, DNA repair, Ubl conjugation pathway. Recognizes and binds to proteins bearing specific N-terminal residues that are destabilizing according to the N-end rule, leading to their ubiquitination and subsequent degradation. Nucleus. Zinc-finger (HECT)
2.	E3 ubiquitin-protein ligase HERC2	HERC2	O95714	DNA damage, DNA repair, Ubl conjugation pathway; regulates ubiquitin-dependent retention of repair proteins on damaged chromosomes. Sumoylated with SUMO1 by PIAS4 in response to double-strand breaks. Nucleus; cytoplasm; cytoskeleton. Zinc-finger (HECT, ZZ)
3.	E3 ubiquitin-protein ligase MARCHF4	MARCHF4	Q9P2E8	Ubl conjugation pathway. Golgi. Zinc-finger (RING)
4.	Ubiquitin carboxyl-terminal hydrolase 49	USP49	Q70CQ1	protein deubiquitination
				Ubl conjugation pathway. Zinc-finger
5.	Ubiquitin carboxyl-terminal hydrolase 32	USP32	Q8NFA0	protein deubiquitination
				Ubl conjugation pathway
6.	E3 ubiquitin-protein transferase RMND5A	RMND5A	Q9H871	Ubl conjugation pathway Oxidized
7.	UBX domain-containing protein 6	UBXN6	Q9BZV1	May negatively regulate the ATPase activity of VCP, an ATP-driven segregase that associates with different cofactors to control a wide variety of cellular processes. Together with VCP and other cofactors, it may play a role in macroautophagy, regulating for instance the clearance of damaged lysosomes. ERAD pathway. Ubl conjugation pathway, macroautophagy. endosome to lysosome transport via multiv…
8.	Polyubiquitin-B	UBB	P0CG47	positive regulation of protein ubiquitination
9.	Polyubiquitin-B	UBB	P0CG47	positive regulation of protein ubiquitination
10.	Cullin-associated NEDD8-dissociated protein 1	CAND1	Q86VP6	Ubl conjugation pathway
11.	Kelch repeat and BTB domain-containing protein 8	KBTBD8	Q8NFY9	Ubl conjugation pathway
12.	Endoplasmin	HSP90B1	P14625	unfolded protein binding, protein folding, ubiquitin-dependent ERAD pathway
13.	Proteasome activator complex subunit 3	PSME3	P61289	protein deubiquitination
14.	F-box/WD repeat-containing protein 10	FBXW10	Q5XX13	Ubl conjugation pathway
15.	Peptidyl-prolyl cis-trans isomerase FKBP10	FKBP10	Q96AY3	accelerate the folding of proteins during protein synthesis
16.	Thimet oligopeptidase	THOP1	P52888	Ubiquitination & Proteasome degradation
17.	Cell cycle and apoptosis regulator protein 2	CCAR2	Q8N163	Ubl conjugation, negative regulation of proteasomal ubiquitin-dependent protein catabolic process
18.	Cullin-associated NEDD8-dissociated protein 1	CAND1	Q86VP6	Ubl conjugation pathway
19.	Puromycin-sensitive aminopeptidase	NPEPPS	P55786	protein polyubiquitination
20.	Receptor of activated protein C kinase 1	RACK1	P63244	negative regulation of endoplasmic reticulum unfolded protein response, positive regulation of proteasomal ubiquitin-dependent protein catabolic process
21.	DnaJ homolog subfamily B member 11	DNAJB11	Q9UBS4	IRE1-mediated unfolded protein response
22.	Calcyclin-binding protein	CACYBP	Q9HB71	Ubl conjugation pathway
23.	F-box only protein 16	FBXO16	Q8IX29	Ubl conjugation pathway
24.	LIM domain only protein 7	LMO7	Q8WWI1	Ubl conjugation pathway
25.	Sentrin-specific protease 3	SENP3	Q9H4L4	Ubl conjugation pathway. Thiol protease, protein desumoylation
26.	Protein O-mannosyl-transferase TMTC4	TMTC4	Q5T4D3	protein O-linked mannosylation protein glycosylation. Protein modification
27.	Tubulin-specific chaperone C	TBCC	Q15814	protein folding
Table S2(9d). DB4h		14 oxidized proteins
	Recommended Protein Name	Gene	UniProt ID	Functions, biological process. GO annotation
1.	E3 ubiquitin-protein ligase HERC2	HERC2	O95714	DNA damage, DNA repair, Ubl conjugation pathway; regulates ubiquitin-dependent retention of repair proteins on damaged chromosomes. Sumoylated with SUMO1 by PIAS4 in response to double-strand breaks. Nucleus; cytoplasm; cytoskeleton; Zinc-finger (HECT, ZZ) Oxidized
2.	E3 ubiquitin-protein ligase DZIP3	DZIP3	Q86Y13	protein polyubiquitination. Ubl conjugation pathway. cytoplasm. Zinc-finger (RING)
3.	E3 ubiquitin-protein ligase Itchy homolog	ITCH	Q96J02	Ubl conjugation pathway. protein de-, auto-& poly- ubiquitination. Involved in the regulation of apoptosis and reactive oxygen species levels through the ubiquitination and proteasomal degradation of TXNIP. Monoubiquitinated. Autopolyubiquitinated with 'Lys-63' linkages which does not lead to protein degradation. Endosome; nucleus; cytoplasm; PM. (HECT) Oxidized
4.	E3 ubiquitin-protein ligase ZNRF2	ZNRF2	Q8NHG8	protein polyubiquitination. Ubl conjugation pathway. Endosome; lysosome; PM. Zinc-finger (RING)
5.	E3 SUMO-protein ligase RanBP2 protein	RANBP2	P49792	Protein transport. Translocation. Component of the nuclear export pathway; Ubl conjugation pathway. Polyubiquitinated by PRKN, which leads to proteasomal degradation. Disulfide bond. Nucleus; nuclear pore complex. Zinc-finger (RANBP2-type)
				The inner channel of the NPC has a different redox environment from the cytoplasm and allows the formation of interchain disulfide bonds between some nucleoporins, the significant increase of these linkages upon oxidative stress reduces the permeability of the NPC.
6.	Baculoviral IAP repeat-containing protein 3	BIRC3	Q13489	act as an E3 ubiquitin-protein ligase. Ubl conjugation pathway. Apoptosis. Auto-ubiquitinated and degraded by the proteasome in apoptotic cells. Zinc-finger (RING)
7.	E3 ubiquitin-protein ligase BRE1A	RNF20	Q5VTR2	histone monoubiquitination; protein polyubiquitination; Ubl conjugation pathway. Nucleus. Zinc-finger (RING)
8.	Probable E3 ubiquitin-protein ligase HERC1	HERC1	Q15751	Transport (membrane trafficking), Ubl conjugation pathway. negative regulation of autophagy. Golgi, cytoplasm. (HECT) Oxidized
9.	Ubiquitin carboxyl-terminal hydrolase 24	USP24	Q9UPU5	cysteine-type endopeptidase activity. protein deubiquitination. ubiquitin-dependent protein catabolic process. Ubl conjugation pathway
10.	Ubiquitin carboxyl-terminal hydrolase isozyme L5	UCHL5	Q9Y5K5	Protease that specifically cleaves 'Lys-48'-linked polyubiquitin chains. Deubiquitinating enzyme associated with the 19S regulatory subunit of the 26S proteasome. DNA damage, DNA recombination, DNA repair, Transcription regulation, Ubl conjugation pathway. Oxidized
11.	Ubiquitin carboxyl-terminal hydrolase 20	USP20	Q9Y2K6	cysteine-type endopeptidase activity. Ubl conjugation pathway. protein deubiquitination. Zinc-finger
12.	Ubiquitin carboxyl-terminal hydrolase 51	USP51	Q70EK9	DNA damage, DNA repair, Ubl conjugation pathway, histone deubiquitination, ubiquitin-dependent protein catabolic process
13.	Deubiquitinase MYSM1	MYSM1	Q5VVJ2	Ubl conjugation pathway, thiol-dependent deubiquitinase, protein deubiquitination
14.	Ubiquitin carboxyl-terminal hydrolase 49	USP49	Q70CQ1	protein deubiquitination
				Ubl conjugation pathway. Zinc-finger
15.	Stress-70 protein, mitochondrial	HSP9A	P38646	unfolded protein binding
16.	UBX domain-containing protein 6	UBXN6	Q9BZV1	May negatively regulate the ATPase activity of VCP, an ATP-driven segregase that associates with different cofactors to control a wide variety of cellular processes. Together with VCP and other cofactors, it may play a role in macroautophagy, regulating for instance the clearance of damaged lysosomes. ERAD pathway. Ubl conjugation pathway, macroautophagy. endosome to lysosome transport via multiv…
17.	Glucosidase 2 subunit beta	PRKCSH	P14314	post-translational protein modification
18.	Polyubiquitin-B	UBB	P0CG47	positive regulation of protein ubiquitination
19.	Peptidyl-prolyl cis-trans isomerase FKBP11	FKBP11	Q9NYL4	chaperone-mediated protein folding
20.	Polyubiquitin-B	UBB	P0CG47	positive regulation of protein ubiquitination
21.	Mitochondrial ubiquitin ligase activator of NFKB 1	MUL1	Q969V5	protein sumoylation, Ubl conjugation pathway. Ubiquitinated by PRKN during mitophagy, leading to its degradation and enhancement of mitophagy
22.	Heat shock 70 kDa protein 1A	HSPA1A	P0DMV8	UPR
23.	Palmitoyltransferase ZDHHC6	ZDHHC6	Q9H6R6	Palmitoylates calnexin (CALX), which is required for its association with the ribosome-translocon complex and efficient folding of glycosylated proteins; Zinc-finger
	(Zinc finger protein 376)
24.	Bleomycin hydrolase	BLMH	Q13867	protein polyubiquitination
25.	DnaJ homolog subfamily C member 3	DNAJC3	Q13217	Unfolded protein response
26.	Microtubule-associated protein 1A	MAP1A	P78559	negative regulation of proteasomal ubiquitin-dependent protein catabolic process
27.	Kelch-like protein 36	KLHL36	Q8N4N3	Ubl conjugation pathway, protein ubiquitination
28.	Methyl-CpG-binding domain protein 5	MBD5	Q9P267	protein deubiquitination Oxidized
29.	WD repeat-containing protein 26	WDR26	Q9H7D7	Core component of the CTLH E3 ubiquitin-protein ligase complex that selectively accepts ubiquitin from UBE2H and mediates ubiquitination and subsequent proteasomal degradation of the transcription factor HBP1, Interacts with DDB1-CUL4A/B E3 ligase complexes
30.	Interferon-induced helicase C domain-containing protein 1	IFIH1	Q9BYX4	protein deubiquitination, protein sumoylation
31.	DNA-dependent protein kinase catalytic subunit	PRKDC	P78527	Ubl conjugation pathway, protein ubiquitination
32.	COP9 signalosome complex subunit 7b	COPS7B	Q9H9Q2	regulator of the ubiquitin (Ubl) conjugation pathway Oxidized
33.	Mucosa-associated lymphoid tissue lymphoma translocation protein 1	MALT1	Q9UDY8	Ubl conjugation pathway Oxidized
34.	Cullin-associated NEDD8-dissociated protein 2	CAND2	O75155	Ubl conjugation pathway Oxidized
35.	Mediator of RNA polymerase II transcription subunit 1	MED1	Q15648	ubiquitin protein ligase activity Oxidized
36.	Adenomatous polyposis coli protein	APC	P25054	protein deubiquitination Oxidized
37.	Tripartite motif-containing protein 3	O75382	O75382	protein polyubiquitination, proteasome-mediated ubiquitin-dependent protein catabolic process
38.	C-type natriuretic peptide	NPPC	P23582	protein folding
39.	Sentrin-specific protease 1	SENP1	Q9P0U3	Ubl conjugation pathway
40.	Cell cycle and apoptosis regulator protein 2	CCAR2	Q8N163	negative regulation of proteasomal ubiquitin-dependent protein catabolic process
41.	NudC domain-containing protein 3	NUDCD3	Q8IVD9	protein folding
42.	Neurogenic differentiation factor 2	NEUROD2	Q15784	protein ubiquitination Oxidized
43.	Cullin-9	CUL9	Q8IWT3	Ubl conjugation pathway
44.	Ubiquitin-associated and SH3 domain-containing protein B	UBASH3B	Q8TF42	Interacts with ubiquitin and with mono-ubiquitinated proteins
45.	Homologous-pairing protein 2 homolog	PSMC3IP	Q9P2W1	modulate the activity of proteasomes
46.	Puromycin-sensitive aminopeptidase	NPEPPS	P55786	protein polyubiquitination
47.	RuvB-like 1	RUVBL1	Q9Y265	protein deubiquitination, Ubl conjugation (PTM)
48.	Protein O-mannosyl-transferase TMTC3	TMTC3	Q6ZXV5	positive regulation of proteasomal protein catabolic process, control of ER stress response, protein O-linked mannosylation Oxidized
49.	Glutamine--fructose-6-phosphate aminotransferase GFPT2	GFPT2	O94808	protein N-linked glycosylation
50.	Sentrin-specific protease 1	SENP1	Q9P0U3	protein desumoylation
				Ubl conjugation pathway
51.	Fetal and adult testis-expressed transcript protein	FATE1	Q969F0	Localized to specific membrane structures termed mitochondria-associated membranes (MAMs) which connect the endoplasmic reticulum (ER) and the mitochondria. Also associated with the outer surface of mitochondria at sites that are not in close contact with the ER; ubiquitin protein ligase binding Oxidized
52.	Ras-specific guanine nucleotide-releasing factor 2	RASGRF2	O14827	Ubl conjugation; Ubiquitinated upon interaction with Ras. Ubiquitination leads to degradation through the 26S proteasome
53.	Protein-tyrosine kinase 2-beta	PTK2B	Q14289	ubiquitin protein ligase binding; regulation of ubiquitin-dependent protein catabolic process Oxidized

## Sheet: S2(10)
Table S2(10). Ub-proteins related with Ras superfamily			(proteins of Ras family listed below in e-h tables)
Table S2(10a). control (Rho, Ran, Rab)
	Recommended Protein Name	Gene	UniProt ID	Molecular functions, biological process. GO annotation
1.	Rho GTPase-activating protein 7	DLC1	Q96QB1	GTPase activation ц/скелет, адгезия, positive regulation of execution phase of apoptosis regulation of small GTPase mediated signal transduction, lipid binding
2.	TBC1 domain family member 12	TBC1D12	O60347	activation of GTPase activity, intracellular protein transport Rab GTPase binding
3.	Dynein regulatory complex subunit 4 GAS8	GAS8	O95995	microtubule binding Rab GTPase binding
4.	Protein ECT2	ECT2	Q9H8V3	catalyzes the exchange of GDP for GTP Rho guanyl-nucleotide exchange factor activity, activation of GTPase activity, cellular response to calcium ion. cellular response to hydrogen peroxide. cellular response to ionizing radiation. positive regulation of apoptotic process, regulation of Rho protein signal transduction, positive regulation of I-kappaB kinase/NF-kappaB signaling, regulation of smal…
5.	Alpha-catulin	CTNNAL1	Q9UBT7	cell adhesion. Rho protein signal transduction
6.	Unconventional myosin-Vb	MYO5B	Q9ULV0	May be involved in vesicular trafficking via its association with the CART complex. vesicle-mediated transport ц/пл endosomal transport Rab GTPase binding
7.	Kinesin-like protein KIF3A	KIF3A	Q9Y496	Microtubule-based anterograde translocator for membranous organelles. Rab GTPase binding, retrograde vesicle-mediated transport, Golgi to endoplasmic reticulum
8.	Protein unc-13 homolog B	UNC13B	O14795	GTP-dependent protein binding. Rab GTPase binding. intracellular signal transduction. Exocytosis
9.	Serine/threonine-protein kinase ULK1	ULK1	O75385	GTPase binding. Rab GTPase binding
10.	Protein ECT2	ECT2	Q9H8V3	regulation of Rho protein signal transduction. protein transport
11.	A-kinase anchor protein 13	AKAP13	Q12802	regulation of small GTPase mediated signal transduction. activate Rho family members
Table S2(10b). DB1h (Rho, Ran, Rab)
	Recommended Protein Name	Gene	UniProt ID	Molecular functions, biological process. GO annotation
1.	RANBP2-like and GRIP domain-containing protein 8	RGPD8	O14715	NLS-bearing protein import into nucleus, positive regulation of GTPase activity ядро Ran GTPase binding
2.	Citron Rho-interacting kinase	CIT	O14578	a role in cytokinesis. G2/M transition of mitotic cell cycle, Golgi organization, neuron apoptotic process Cell cycle, Cell division, Differentiation, Mitosis Putative RHO/RAC effector that binds to the GTP-bound forms of RHO and RAC1.
3.	TBC1 domain family member 24	TBC1D24	Q9ULP9	May act as a GTPase-activating protein for Rab family protein(s)
4.	E3 ubiquitin-protein ligase RNF128	RNF128	Q8TEB7	Partially colocalized with the endoplasmic reticulum resident HSPA5, with Golgi resident STX5, and with the late endosomal GTPase RAB7A
5.	Intersectin-2	ITSN2	Q9NZM3	calcium ion binding regulation of Rho protein signal transduction Rho guanyl-nucleotide exchange factor activity. regulation of Rho protein signal transduction
6.	Exportin-2	CSE1L	P55060	Ran GTPase binding Protein transport, Transport
7.	RAB6A-GEF complex partner protein 1	RIC1	Q4ADV7	positive regulation of GTPase activity. Rab GTPase binding
8.	A-kinase anchor protein 13	AKAP13	Q12802	regulation of small GTPase mediated signal transduction. activate Rho family members
9.	Ras-related protein Rab-30	RAB30	Q15771	key regulators of intracellular membrane trafficking, from the formation of transport vesicles to their fusion with membranes. Required for maintaining the structural integrity of the Golgi apparatus, possibly by mediating interactions with cytoplasmic scaffolding proteins
Table S2(10c). D4h (Rho, Ran, Rab)
	Recommended Protein Name	Gene	UniProt ID	Molecular functions, biological process. GO annotation
1.	Ran GTPase-activating protein 1	RANGAP1	P46060	GTPase activator activity. Ran GTPase binding. GTPase activation
2.	TBC1 domain family member 24	TBC1D24	Q9ULP9	May act as a GTPase-activating protein for Rab family protein(s) GTPase activation
3.	Rapamycin-insensitive companion of mTOR	RICTOR	Q6R327	mTORC2 seems to function upstream of Rho GTPases to regulate the actin cytoskeleton, probably by activating one or more Rho-type guanine nucleotide exchange factors
4.	Pleckstrin homology domain-containing family G member 1 PLEKHG1	PLEKHG1	Q9ULL1	regulation of Rho protein signal transduction
5.	Rho GTPase-activating protein 17	ARHGAP17	Q68EM7	regulation of actin cytoskeleton organization, regulation of small GTPase mediated signal transduction calcium ion regulated exocytosis
6.	TBC1 domain family member 30	TBC1D30	Q9Y2I9	activation of GTPase activity, intracellular protein transport Rab GTPase binding
7.	Kinesin-like protein KIF16B	KIF16B	Q96L93	Rab GTPase binding, microtubule-based movement; Motor protein
8.	Rho GTPase-activating protein 36 ARHGAP36	ARHGAP36	Q6ZRI8	regulation of small GTPase mediated signal transduction
9.	WD repeat-containing protein 44	WDR44	Q5JSH3	Downstream effector for RAB11. May be involved in vesicle recycling Golgi apparatus
10.	Synaptopodin-2	SYNPO2	Q9UMS6	autophagosome assembly, chaperone-mediated autophagy, positive regulation of actin filament bundle assembly, regulation of Rho-dependent protein serine/threonine kinase activity
11.	Exocyst complex component 5	EXOC5	O00471	Component of the exocyst complex involved in the docking of exocytic vesicles with fusion sites on the plasma membrane; protein transport Ral GTPase binding
12.	Citron Rho-interacting kinase	CIT	O14578	role in cytokinesis. Putative RHO/RAC effector that binds to the GTP-bound forms of RHO and RAC1
13.	Stathmin	STMN1	P16949	regulation of cytoskeleton organization; negative regulation of Rho protein signal transduction
14.	TBC1 domain family member 3I	TBC1D3I	A0A087WXS9	activation of GTPase activity,intracellular protein transport Rab GTPase binding
15.	A-kinase anchor protein 13 AKAP13	AKAP13	Q12802	regulation of small GTPase mediated signal transduction. activate Rho family members
16.	Transportin-1 1 оп	TNPO1	Q92973	protein import into nucleus, translocation. Ran GTPase binding, Protein transport, Transport, intraciliary transport involved in cilium assembly
17.	RUN domain-containing protein 1	RUNDC1	Q96C34	intracellular protein transport May play a role as p53/TP53 inhibitor and thus may have oncogenic activity. Rab GTPase binding
Table S2(10d). DB4h (Rho, Ran, Rab)
	Recommended Protein Name	Gene	UniProt ID	Molecular functions, biological process. GO annotation
1.	TBC1 domain family member 24	TBC1D24	Q9ULP9	May act as a GTPase-activating protein for Rab family protein(s)
2.	T-lymphoma invasion and metastasis-inducing protein 2	TIAM2	Q8IVF5	Modulates the activity of RHO-like proteins and connects extracellular signals to cytoskeletal activities. regulation of small GTPase mediated signal transduction. regulation of Rho protein signal transduction, regulation of lipid metabolic process
3.	TBC1 domain family member 10B	TBC1D10B	Q4KMP7	Acts as GTPase-activating protein for RAB3A, RAB22A, RAB27A, AND RAB35. Does not act on RAB2A and RAB6A. Rab GTPase binding GTPase activation
4.	Protein bicaudal D homolog 2	BICD2	Q8TD16	Regulates coat complex coatomer protein I (COPI)-independent Golgi-endoplasmic reticulum transport via its interaction with RAB6A and recruitment of the dynein-dynactin motor complex. Rab GTPase binding; Translocation
5.	Obscurin	OBSCN	Q5VST9	regulation of Rho protein signal transduction, G protein-coupled receptor signaling pathway
6.	Epidermal growth factor receptor kinase substrate 8-like protein 3	EPS8L3	Q8TE67	actin binding positive regulation of ruffle assembly, Rho protein signal transduction
7.	Rho-associated protein kinase 1	ROCK1	Q13464	Rho-dependent protein serine/threonine kinase activity, G protein-coupled receptor signaling pathway
8.	Rho GTPase-activating protein 35	ARHGAP35	Q9NRY4	Transcription regulation regulation of small GTPase mediated signal transduction
9.	E3 SUMO-protein ligase RanBP2	RANBP2	P49792	Ran GTPase binding; Protein transport
10.	FERM, ARHGEF and pleckstrin domain-containing protein 1	FARP1	Q9Y4F1	cytoskeletal protein binding, regulation of Rho protein signal transduction
11.	Integrin beta-1	ITGB1	P05556	negative regulation of Rho protein signal transduction
12.	Guanine nucleotide exchange factor DBS	MCF2L	O15068	Rho guanyl-nucleotide exchange factor activity . G protein-coupled receptor signaling pathway. regulation of small GTPase mediated signal transduction
13.	T-cell activation Rho GTPase-activating protein	TAGAP	Q8N103	regulation of small GTPase mediated signal transduction
14.	Probable E3 ubiquitin-protein ligase HERC1	HERC1	Q15751	Acts as a GEF for Arf and Rab, by exchanging bound GDP for free GTP. Binds phosphatidylinositol 4,5-bisphosphate, which is required for GEF activity
15.	Rapamycin-insensitive companion of mTOR	RICTOR	Q6R327	regulation of GTPase activity, mTORC2 seems to function upstream of Rho GTPases to regulate the actin cytoskeleton, probably by activating one or more Rho-type guanine nucleotide exchange factors
16.	Protein diaphanous homolog 1	DIAPH1	O60610	regulation of cytoskeleton organization, Rho GTPase binding. protein localization to microtubule
17.	Post-GPI attachment to proteins factor 6	TMEM8A	Q9HCN3	translocation of RAC1 from the cytosol to the plasma membrane by maintaining the steady state amount of CAV1-enriched plasma membrane subdomains, stabilizing RAC1 at the plasma membrane. Involved in lipid remodeling steps of GPI-anchor maturation. The Rac1 GTPase plays key roles in cytoskeletal organization, cell motility and a variety of physiological and disease-linked responses
18.	A-kinase anchor protein 13	AKAP13	Q12802	regulation of small GTPase mediated signal transduction. activate Rho family members
19.	Ras-related protein Rab-5C	RAB5C	P51148	Protein transport. Probably involved in vesicular traffic, plasma membrane to endosome transport, regulation of endocytosis
20.	Ras-related protein Rab-26	RAB26	Q9ULW5	key regulators of intracellular membrane trafficking, from the formation of transport Golgi vesicles to their fusion with membranes. regulated exocytosis
21.	Reticulon-4	RTN4	Q9NQC3	positive regulation of Rac protein signal transduction. Rac is a subfamily of the Rho family of GTPases
Ras family
Table S2(10e). Control
	Recommended Protein Name	Gene	UniProt ID	Molecular functions, biological process. GO annotation
1.	Ras-related and estrogen-regulated growth inhibitor	RERG	Q96A58	Binds GDP/GTP and possesses intrinsic GTPase activity; small GTPase mediated signal transduction
2.	SH3 domain-containing protein 19	SH3D19	Q5HYK7	May play a role in regulating A disintegrin and metalloproteases (ADAMs) in the signaling of EGFR-ligand shedding. May be involved in suppression of Ras-induced cellular transformation and Ras-mediated activation of ELK1. Plays a role in the regulation of cell morphology and cytoskeletal organization
3.	Tyrosine-protein kinase Lyn	LYN	P07948	negative regulation of MAP kinase activity positive regulation of Ras protein signal transduction
4.	Fructose-1,6-bisphosphatase 1	FBP1	P09467	negative regulation of Ras protein signal transduction, cellular response to drug
Table S2(10f). DB1h
	Recommended Protein Name	Gene	UniProt ID	Molecular functions, biological process. GO annotation
1.	Rap guanine nucleotide exchange factor 6	RAPGEF6	Q8TEU7	Ras protein signal transduction regulation of GTPase activity
2.	Ral guanine nucleotide dissociation stimulator	RALGDS	Q12967	effector molecule for R-Ras, H-Ras, K-Ras, and Rap; Ras protein signal transduction
3.	Filamin-A	FLNA	P21333	small GTPase binding; Rac GTPase binding; Ral GTPase binding Rho GTPase binding; SMAD binding
4.	RalBP1-associated Eps domain-containing protein 1	REPS1	Q96D71	May coordinate the cellular actions of activated EGF receptors and Ral-GTPases. membrane organization, receptor-mediated endocytosis
Table S2(10g). D4h
	Recommended Protein Name	Gene	UniProt ID	Molecular functions, biological process. GO annotation
1.	Fibroblast growth factor 4	FGF4	P08620	Ras guanyl-nucleotide exchange factor activity
2.	Ras-responsive element-binding protein 1	RREB1	Q92766	Transcription factor that binds specifically to the RAS-responsive elements (RRE) of gene promoters. May be involved in Ras/Raf-mediated cell differentiation by enhancing calcitonin expression
3.	RasGAP-activating-like protein 1	RASAL1	O95294	cellular response to calcium ion, MAPK cascade, negative regulation of Ras protein signal transduction
4.	Son of sevenless homolog 1	SOS1	Q07889	Ras protein signal transduction
Table S2(10h). DB4h
	Recommended Protein Name	Gene	UniProt ID	Molecular functions, biological process. GO annotation
1.	Son of sevenless homolog 1	SOS1	Q07889	Ras protein signal transduction
2.	Ras guanyl-releasing protein 3	RASGRP3	Q8IV61	Ras protein signal transduction, small GTPase mediated signal transduction
3.	Ras GTPase-activating-like protein IQGAP3	IQGAP3	Q86VI3	regulation of cell size, regulation of GTPase activity, Calmodulin-binding, Ras protein signal transduction
4.	Ras-specific guanine nucleotide-releasing factor 2	RASGRF2	O14827	calcium-regulated nucleotide exchange factor activating both Ras and RAC1 through the exchange of bound GDP for GTP. response to endoplasmic reticulum stress, calmodulin binding
5.	Histone-lysine N-methyltransferase SETDB1	SETDB1	Q15047	Ras protein signal transduction
6.	Ral guanine nucleotide dissociation stimulator	RALGDS	Q12967	Ras protein signal transduction Guanine-nucleotide releasing factor
7.	RalA-binding protein 1	RALBP1	Q15311	positive regulation of GTPase activity, regulation of small GTPase mediated signal transduction, Ral GTPase binding, small GTPase mediated signal transduction
8.	RalBP1-associated Eps domain-containing protein 2	REPS2	Q8NFH8	Ca binding, membrane organization ц/пл Involved in growth factor signaling through its influence on the Ral signaling pathway. Clathrin-mediated endocytosis

[truncated: 7 more sheets: S2(11), S2(12), S2(13), S2(14), S2(15), S2(16), S2(17)]
